# Supplementary material for: Accurate prediction of carbon dioxide capture by deep eutectic solvents using quantum chemistry and a neural network
Source: Royal Society of Chemistry journal article supplement (doi:10.1039/d2gc04425k), 2023-01-01
Supplement: d2gc04425k1.xlsx [file d2gc04425k1.xlsx]

## Sheet: Title
Accurate Prediction of Carbon Dioxide Capture by Deep Eutectic Solvents using Quantum Chemistry and a Neural Network
Mood Mohan*,1,2,3, Omar Demerdash3, Blake A. Simmons1,4, Jeremy C. Smith3,5, Michelle Kidder6, and Seema Singh*,1,2
1 Deconstruction Division, Joint BioEnergy Institute, 5885 Hollis Street, Emeryville, California 94608, United States
2 Bioresource and Environmental Security Department, Sandia National Laboratories, 7011 East Avenue, Livermore, California 94551, United States
3 Center for Molecular Biophysics, Oak Ridge National Laboratory, Oak Ridge, Tennessee 37831, United States
4 Biological Systems and Engineering Division, Lawrence Berkeley National Laboratory, 1 Cyclotron Road, Berkeley, California 94720, United States
5 Department of Biochemistry and Cellular and Molecular Biology, University of Tennessee, Knoxville, Tennessee 37996, United States
6 Manufacturing Science Division, Oak Ridge National Laboratory, Oak Ridge, Tennessee 37831-6201, United States
Corresponding Authors
* E-mail: moodm@ornl.gov; mohanchauhan08@gmail.com (M. Mohan)
Seema.Rose.Singh@gmail.com (Seema Singh)

## Sheet: CO2 Solubility DESs ML
																Williams plot
DES	T (K)	P (kPa)	S1	S2	S3	S4	S5	S6	S7	S8	S9	S10	ln(x)-experimental	Split	ln(x)-ANN	Leverage	Standadized Residuals
[Ach]Cl-1,2,4-triazole (1 : 1)	303.15	63.7	0.0229	0.369525	1.36967	4.43468	3.93895	1.36715	0.9535	1.4995	2.131	0.028325	-5.7138	Testing	-5.7675	0.00715571	0.895848
[Ach]Cl-1,2,4-triazole (1 : 1)	303.15	107.6	0.0229	0.369525	1.36967	4.43468	3.93895	1.36715	0.9535	1.4995	2.131	0.028325	-5.24	Training	-5.39288	0.00708654	1.28551
[Ach]Cl-1,2,4-triazole (1 : 1)	303.15	192.5	0.0229	0.369525	1.36967	4.43468	3.93895	1.36715	0.9535	1.4995	2.131	0.028325	-4.6777	Testing	-4.81518	0.00696099	1.03908
[Ach]Cl-1,2,4-triazole (1 : 1)	303.15	288.3	0.0229	0.369525	1.36967	4.43468	3.93895	1.36715	0.9535	1.4995	2.131	0.028325	-4.2977	Testing	-4.36167	0.00683232	1.12264
[Ach]Cl-1,2,4-triazole (1 : 1)	303.15	382.9	0.0229	0.369525	1.36967	4.43468	3.93895	1.36715	0.9535	1.4995	2.131	0.028325	-4.0286	Testing	-4.0506	0.00671877	1.08074
[Ach]Cl-1,2,4-triazole (1 : 1)	303.15	496.8	0.0229	0.369525	1.36967	4.43468	3.93895	1.36715	0.9535	1.4995	2.131	0.028325	-3.781	Testing	-3.77326	0.00659989	0.853206
[Ach]Cl-1,2,4-triazole (1 : 1)	303.15	587.7	0.0229	0.369525	1.36967	4.43468	3.93895	1.36715	0.9535	1.4995	2.131	0.028325	-3.6231	Training	-3.59015	0.00651898	0.627835
[Ach]Cl-1,2,4-triazole (1 : 1)	313.15	56.3	0.0229	0.369525	1.36967	4.43468	3.93895	1.36715	0.9535	1.4995	2.131	0.028325	-6.0748	Testing	-5.97945	0.00666126	0.689316
[Ach]Cl-1,2,4-triazole (1 : 1)	313.15	101.6	0.0229	0.369525	1.36967	4.43468	3.93895	1.36715	0.9535	1.4995	2.131	0.028325	-5.5215	Testing	-5.58456	0.00658401	1.17755
[Ach]Cl-1,2,4-triazole (1 : 1)	313.15	219.6	0.0229	0.369525	1.36967	4.43468	3.93895	1.36715	0.9535	1.4995	2.131	0.028325	-4.756	Training	-4.81109	0.00639724	1.03323
[Ach]Cl-1,2,4-triazole (1 : 1)	313.15	366.6	0.0229	0.369525	1.36967	4.43468	3.93895	1.36715	0.9535	1.4995	2.131	0.028325	-4.2475	Training	-4.2386	0.0061938	1.18043
[Ach]Cl-1,2,4-triazole (1 : 1)	313.15	444.5	0.0229	0.369525	1.36967	4.43468	3.93895	1.36715	0.9535	1.4995	2.131	0.028325	-4.057	Testing	-4.0321	0.00609915	1.01476
[Ach]Cl-1,2,4-triazole (1 : 1)	313.15	523.9	0.0229	0.369525	1.36967	4.43468	3.93895	1.36715	0.9535	1.4995	2.131	0.028325	-3.8922	Training	-3.8563	0.00601204	0.891483
[Ach]Cl-1,2,4-triazole (1 : 1)	313.15	572.2	0.0229	0.369525	1.36967	4.43468	3.93895	1.36715	0.9535	1.4995	2.131	0.028325	-3.7942	Testing	-3.76002	0.00596368	0.725353
[Ach]Cl-1,2,4-triazole (1 : 1)	323.15	58.4	0.0229	0.369525	1.36967	4.43468	3.93895	1.36715	0.9535	1.4995	2.131	0.028325	-6.2659	Training	-6.13775	0.00633834	0.760895
[Ach]Cl-1,2,4-triazole (1 : 1)	323.15	147.7	0.0229	0.369525	1.36967	4.43468	3.93895	1.36715	0.9535	1.4995	2.131	0.028325	-5.3391	Testing	-5.41758	0.00617858	1.29252
[Ach]Cl-1,2,4-triazole (1 : 1)	323.15	251.5	0.0229	0.369525	1.36967	4.43468	3.93895	1.36715	0.9535	1.4995	2.131	0.028325	-4.8796	Training	-4.83556	0.00600792	0.954008
[Ach]Cl-1,2,4-triazole (1 : 1)	323.15	340.7	0.0229	0.369525	1.36967	4.43468	3.93895	1.36715	0.9535	1.4995	2.131	0.028325	-4.5469	Testing	-4.49594	0.00587418	1.04289
[Ach]Cl-1,2,4-triazole (1 : 1)	323.15	439	0.0229	0.369525	1.36967	4.43468	3.93895	1.36715	0.9535	1.4995	2.131	0.028325	-4.2977	Training	-4.22263	0.00574064	0.984071
[Ach]Cl-1,2,4-triazole (1 : 1)	323.15	542	0.0229	0.369525	1.36967	4.43468	3.93895	1.36715	0.9535	1.4995	2.131	0.028325	-4.0745	Testing	-3.99703	0.00561627	0.721433
[Ach]Cl-1,2,4-triazole (1 : 1)	323.15	593.2	0.0229	0.369525	1.36967	4.43468	3.93895	1.36715	0.9535	1.4995	2.131	0.028325	-3.9846	Testing	-3.89799	0.00556038	0.569544
[Ach]Cl-1,2,4-triazole (1 : 1)	333.15	56.3	0.0229	0.369525	1.36967	4.43468	3.93895	1.36715	0.9535	1.4995	2.131	0.028325	-6.4378	Training	-6.36133	0.00621057	0.902546
[Ach]Cl-1,2,4-triazole (1 : 1)	333.15	116.3	0.0229	0.369525	1.36967	4.43468	3.93895	1.36715	0.9535	1.4995	2.131	0.028325	-5.684	Training	-5.85056	0.00609453	1.6117
[Ach]Cl-1,2,4-triazole (1 : 1)	333.15	186.5	0.0229	0.369525	1.36967	4.43468	3.93895	1.36715	0.9535	1.4995	2.131	0.028325	-5.2785	Training	-5.37562	0.00596562	1.3149
[Ach]Cl-1,2,4-triazole (1 : 1)	333.15	290.9	0.0229	0.369525	1.36967	4.43468	3.93895	1.36715	0.9535	1.4995	2.131	0.028325	-4.8409	Testing	-4.87623	0.00578759	1.14513
[Ach]Cl-1,2,4-triazole (1 : 1)	333.15	396.1	0.0229	0.369525	1.36967	4.43468	3.93895	1.36715	0.9535	1.4995	2.131	0.028325	-4.5564	Training	-4.53742	0.00562475	1.1223
[Ach]Cl-1,2,4-triazole (1 : 1)	333.15	487.4	0.0229	0.369525	1.36967	4.43468	3.93895	1.36715	0.9535	1.4995	2.131	0.028325	-4.3275	Testing	-4.31631	0.00549688	0.95249
[Ach]Cl-1,2,4-triazole (1 : 1)	333.15	581	0.0229	0.369525	1.36967	4.43468	3.93895	1.36715	0.9535	1.4995	2.131	0.028325	-4.1541	Testing	-4.12684	0.00537879	0.6958
Thymol-2,6-xylenol (1 : 1)	293.15	3905.7	0.017025	0.4162	0.24805	2.12257	6.3154	5.75355	2.83067	0.621175	0.00725	0	-0.9429	Training	-0.960444	0.0190576	0.361909
Thymol-2,6-xylenol (1 : 1)	293.15	3198.8	0.017025	0.4162	0.24805	2.12257	6.3154	5.75355	2.83067	0.621175	0.00725	0	-1.147	Testing	-1.17023	0.0157893	0.39846
Thymol-2,6-xylenol (1 : 1)	293.15	2593.2	0.017025	0.4162	0.24805	2.12257	6.3154	5.75355	2.83067	0.621175	0.00725	0	-1.3398	Testing	-1.34577	0.013586	0.425035
Thymol-2,6-xylenol (1 : 1)	293.15	1607	0.017025	0.4162	0.24805	2.12257	6.3154	5.75355	2.83067	0.621175	0.00725	0	-1.794	Testing	-1.81911	0.0111762	0.143252
Thymol-2,6-xylenol (1 : 1)	303.15	3984	0.017025	0.4162	0.24805	2.12257	6.3154	5.75355	2.83067	0.621175	0.00725	0	-1.0481	Testing	-1.06154	0.0186854	0.258373
Thymol-2,6-xylenol (1 : 1)	303.15	3256.3	0.017025	0.4162	0.24805	2.12257	6.3154	5.75355	2.83067	0.621175	0.00725	0	-1.2521	Training	-1.26051	0.0153341	0.398193
Thymol-2,6-xylenol (1 : 1)	303.15	2634.4	0.017025	0.4162	0.24805	2.12257	6.3154	5.75355	2.83067	0.621175	0.00725	0	-1.4321	Testing	-1.42786	0.0130999	0.423439
Thymol-2,6-xylenol (1 : 1)	303.15	1630	0.017025	0.4162	0.24805	2.12257	6.3154	5.75355	2.83067	0.621175	0.00725	0	-1.8965	Testing	-1.88083	0.0107176	0.132242
Thymol-2,6-xylenol (1 : 1)	313.15	4044.1	0.017025	0.4162	0.24805	2.12257	6.3154	5.75355	2.83067	0.621175	0.00725	0	-1.1783	Training	-1.15491	0.0183975	0.193881
Thymol-2,6-xylenol (1 : 1)	313.15	3302.9	0.017025	0.4162	0.24805	2.12257	6.3154	5.75355	2.83067	0.621175	0.00725	0	-1.3295	Testing	-1.3368	0.0150135	0.383171
Thymol-2,6-xylenol (1 : 1)	313.15	2669.6	0.017025	0.4162	0.24805	2.12257	6.3154	5.75355	2.83067	0.621175	0.00725	0	-1.5488	Testing	-1.4911	0.0127754	0.369975
Thymol-2,6-xylenol (1 : 1)	313.15	1650	0.017025	0.4162	0.24805	2.12257	6.3154	5.75355	2.83067	0.621175	0.00725	0	-1.9827	Testing	-1.92609	0.010437	0.161361
Thymol-2,6-xylenol (1 : 1)	323.15	4085.3	0.017025	0.4162	0.24805	2.12257	6.3154	5.75355	2.83067	0.621175	0.00725	0	-1.2455	Training	-1.23947	0.0181921	0.2516
Thymol-2,6-xylenol (1 : 1)	323.15	3338	0.017025	0.4162	0.24805	2.12257	6.3154	5.75355	2.83067	0.621175	0.00725	0	-1.4045	Training	-1.4008	0.014827	0.47163
Thymol-2,6-xylenol (1 : 1)	323.15	2698.8	0.017025	0.4162	0.24805	2.12257	6.3154	5.75355	2.83067	0.621175	0.00725	0	-1.6094	Training	-1.53902	0.0126138	0.496922
Thymol-2,6-xylenol (1 : 1)	323.15	1667	0.017025	0.4162	0.24805	2.12257	6.3154	5.75355	2.83067	0.621175	0.00725	0	-2.0691	Testing	-1.95729	0.0103353	0.192362
[Ch]Cl-Urea (1 : 1.5)	313.15	1070	0	0.47619	1.896	3.48228	1.7075	0.90319	0.73165	1.29903	2.26433	0.01547	-2.9759	Testing	-2.77223	0.0104178	1.25281
[Ch]Cl-Urea (1 : 1.5)	313.15	2520	0	0.47619	1.896	3.48228	1.7075	0.90319	0.73165	1.29903	2.26433	0.01547	-2.3434	Training	-2.22181	0.0103402	1.65366
[Ch]Cl-Urea (1 : 1.5)	313.15	4210	0	0.47619	1.896	3.48228	1.7075	0.90319	0.73165	1.29903	2.26433	0.01547	-2.1037	Training	-1.97891	0.0142325	0.872635
[Ch]Cl-Urea (1 : 1.5)	313.15	6090	0	0.47619	1.896	3.48228	1.7075	0.90319	0.73165	1.29903	2.26433	0.01547	-1.8389	Training	-1.85155	0.0235997	-0.000566732
[Ch]Cl-Urea (1 : 1.5)	323.15	850	0	0.47619	1.896	3.48228	1.7075	0.90319	0.73165	1.29903	2.26433	0.01547	-3.4112	Training	-3.23771	0.0103852	1.01821
[Ch]Cl-Urea (1 : 1.5)	323.15	2330	0	0.47619	1.896	3.48228	1.7075	0.90319	0.73165	1.29903	2.26433	0.01547	-2.5383	Training	-2.50562	0.00967311	1.59382
[Ch]Cl-Urea (1 : 1.5)	323.15	3690	0	0.47619	1.896	3.48228	1.7075	0.90319	0.73165	1.29903	2.26433	0.01547	-2.333	Training	-2.23871	0.0119177	0.994639
[Ch]Cl-Urea (1 : 1.5)	323.15	6130	0	0.47619	1.896	3.48228	1.7075	0.90319	0.73165	1.29903	2.26433	0.01547	-1.9379	Training	-1.906	0.0229037	-0.017079
[Ch]Cl-Urea (1 : 1.5)	333.15	1230	0	0.47619	1.896	3.48228	1.7075	0.90319	0.73165	1.29903	2.26433	0.01547	-3.2702	Training	-3.15639	0.00971027	0.990022
[Ch]Cl-Urea (1 : 1.5)	333.15	2590	0	0.47619	1.896	3.48228	1.7075	0.90319	0.73165	1.29903	2.26433	0.01547	-2.6736	Training	-2.7261	0.00954621	1.31603
[Ch]Cl-Urea (1 : 1.5)	333.15	4780	0	0.47619	1.896	3.48228	1.7075	0.90319	0.73165	1.29903	2.26433	0.01547	-2.3228	Testing	-2.11757	0.0151171	0.355189
[Ch]Cl-Urea (1 : 1.5)	333.15	6550	0	0.47619	1.896	3.48228	1.7075	0.90319	0.73165	1.29903	2.26433	0.01547	-2.1037	Training	-1.96787	0.0248803	-0.494584
[Ach]Cl-Imidazole (2 : 3)	303.15	30.2	0.00063	0.37779	1.06212	4.33936	3.25325	1.84092	1.21947	1.14857	1.71297	0.13784	-7.1309	Training	-6.30353	0.00613633	-1.98144
[Ach]Cl-Imidazole (2 : 3)	303.15	86.7	0.00063	0.37779	1.06212	4.33936	3.25325	1.84092	1.21947	1.14857	1.71297	0.13784	-5.4727	Training	-5.7494	0.00610592	0.92869
[Ach]Cl-Imidazole (2 : 3)	303.15	198.4	0.00063	0.37779	1.06212	4.33936	3.25325	1.84092	1.21947	1.14857	1.71297	0.13784	-4.646	Training	-4.89249	0.00605991	0.885521
[Ach]Cl-Imidazole (2 : 3)	303.15	300.3	0.00063	0.37779	1.06212	4.33936	3.25325	1.84092	1.21947	1.14857	1.71297	0.13784	-4.2904	Testing	-4.38756	0.00603428	0.876086
[Ach]Cl-Imidazole (2 : 3)	303.15	388.1	0.00063	0.37779	1.06212	4.33936	3.25325	1.84092	1.21947	1.14857	1.71297	0.13784	-4.0513	Training	-4.10032	0.00602469	0.865414
[Ach]Cl-Imidazole (2 : 3)	303.15	486.8	0.00063	0.37779	1.06212	4.33936	3.25325	1.84092	1.21947	1.14857	1.71297	0.13784	-3.8397	Training	-3.87074	0.00602773	0.6573
[Ach]Cl-Imidazole (2 : 3)	303.15	572.6	0.00063	0.37779	1.06212	4.33936	3.25325	1.84092	1.21947	1.14857	1.71297	0.13784	-3.6809	Training	-3.71328	0.00604225	0.416936
[Ach]Cl-Imidazole (2 : 3)	313.15	65.21	0.00063	0.37779	1.06212	4.33936	3.25325	1.84092	1.21947	1.14857	1.71297	0.13784	-5.9522	Training	-6.07113	0.00537332	0.68985
[Ach]Cl-Imidazole (2 : 3)	313.15	147.7	0.00063	0.37779	1.06212	4.33936	3.25325	1.84092	1.21947	1.14857	1.71297	0.13784	-5.2591	Training	-5.36217	0.00532498	0.853236
[Ach]Cl-Imidazole (2 : 3)	313.15	201.4	0.00063	0.37779	1.06212	4.33936	3.25325	1.84092	1.21947	1.14857	1.71297	0.13784	-4.9618	Training	-5.00024	0.00529901	0.595716
[Ach]Cl-Imidazole (2 : 3)	313.15	295.9	0.00063	0.37779	1.06212	4.33936	3.25325	1.84092	1.21947	1.14857	1.71297	0.13784	-4.5756	Training	-4.53475	0.00526381	0.729505
[Ach]Cl-Imidazole (2 : 3)	313.15	427.6	0.00063	0.37779	1.06212	4.33936	3.25325	1.84092	1.21947	1.14857	1.71297	0.13784	-4.1734	Testing	-4.1324	0.00523712	0.684835
[Ach]Cl-Imidazole (2 : 3)	313.15	547.6	0.00063	0.37779	1.06212	4.33936	3.25325	1.84092	1.21947	1.14857	1.71297	0.13784	-3.907	Training	-3.8899	0.00523546	0.503766
[Ach]Cl-Imidazole (2 : 3)	323.15	29.8	0.00063	0.37779	1.06212	4.33936	3.25325	1.84092	1.21947	1.14857	1.71297	0.13784	-6.5023	Testing	-6.56157	0.00484519	0.486662
[Ach]Cl-Imidazole (2 : 3)	323.15	111	0.00063	0.37779	1.06212	4.33936	3.25325	1.84092	1.21947	1.14857	1.71297	0.13784	-5.5215	Training	-5.79654	0.00478349	1.39975
[Ach]Cl-Imidazole (2 : 3)	323.15	148.6	0.00063	0.37779	1.06212	4.33936	3.25325	1.84092	1.21947	1.14857	1.71297	0.13784	-5.3185	Testing	-5.49855	0.00475827	1.14761
[Ach]Cl-Imidazole (2 : 3)	323.15	238.5	0.00063	0.37779	1.06212	4.33936	3.25325	1.84092	1.21947	1.14857	1.71297	0.13784	-4.8929	Testing	-4.94083	0.00470658	0.780972
[Ach]Cl-Imidazole (2 : 3)	323.15	329.1	0.00063	0.37779	1.06212	4.33936	3.25325	1.84092	1.21947	1.14857	1.71297	0.13784	-4.5952	Testing	-4.56171	0.00466675	0.833521
[Ach]Cl-Imidazole (2 : 3)	323.15	425.7	0.00063	0.37779	1.06212	4.33936	3.25325	1.84092	1.21947	1.14857	1.71297	0.13784	-4.3428	Testing	-4.28755	0.00463786	0.738844
[Ach]Cl-Imidazole (2 : 3)	323.15	529.8	0.00063	0.37779	1.06212	4.33936	3.25325	1.84092	1.21947	1.14857	1.71297	0.13784	-4.1352	Training	-4.07242	0.00462241	0.533952
[Ach]Cl-Imidazole (2 : 3)	323.15	589.2	0.00063	0.37779	1.06212	4.33936	3.25325	1.84092	1.21947	1.14857	1.71297	0.13784	-4.0342	Testing	-3.9686	0.00462089	0.303685
[Ach]Cl-Imidazole (2 : 3)	333.15	33	0.00063	0.37779	1.06212	4.33936	3.25325	1.84092	1.21947	1.14857	1.71297	0.13784	-6.8124	Testing	-6.68444	0.00447755	0.212249
[Ach]Cl-Imidazole (2 : 3)	333.15	92.3	0.00063	0.37779	1.06212	4.33936	3.25325	1.84092	1.21947	1.14857	1.71297	0.13784	-5.9915	Testing	-6.11716	0.00442469	1.0753
[Ach]Cl-Imidazole (2 : 3)	333.15	141.7	0.00063	0.37779	1.06212	4.33936	3.25325	1.84092	1.21947	1.14857	1.71297	0.13784	-5.6268	Training	-5.71049	0.00438469	1.11222
[Ach]Cl-Imidazole (2 : 3)	333.15	235.4	0.00063	0.37779	1.06212	4.33936	3.25325	1.84092	1.21947	1.14857	1.71297	0.13784	-5.116	Training	-5.11994	0.00431887	0.769987
[Ach]Cl-Imidazole (2 : 3)	333.15	346.1	0.00063	0.37779	1.06212	4.33936	3.25325	1.84092	1.21947	1.14857	1.71297	0.13784	-4.7444	Training	-4.6707	0.0042581	0.85405
[Ach]Cl-Imidazole (2 : 3)	333.15	441.6	0.00063	0.37779	1.06212	4.33936	3.25325	1.84092	1.21947	1.14857	1.71297	0.13784	-4.5099	Training	-4.41563	0.00422046	0.72305
[Ach]Cl-Imidazole (2 : 3)	333.15	536.3	0.00063	0.37779	1.06212	4.33936	3.25325	1.84092	1.21947	1.14857	1.71297	0.13784	-4.3125	Training	-4.22437	0.00419664	0.510072
[Ach]Cl-Imidazole (2 : 3)	333.15	594	0.00063	0.37779	1.06212	4.33936	3.25325	1.84092	1.21947	1.14857	1.71297	0.13784	-4.1997	Testing	-4.12329	0.00418873	0.319589
[TOA]Cl-DecA (1 : 1.5)	298.15	90	0.02955	0.31167	0.33528	3.03883	21.3422	13.4156	1.01635	1.19102	1.32186	0.16984	-4.0864	Testing	-4.1081	0.0126384	0.123074
[TOA]Cl-DecA (1 : 1.5)	298.15	190	0.02955	0.31167	0.33528	3.03883	21.3422	13.4156	1.01635	1.19102	1.32186	0.16984	-3.3581	Testing	-3.40097	0.0125902	0.057815
[TOA]Cl-DecA (1 : 1.5)	298.15	290	0.02955	0.31167	0.33528	3.03883	21.3422	13.4156	1.01635	1.19102	1.32186	0.16984	-2.9779	Training	-2.94288	0.012557	-0.175481
[TOA]Cl-DecA (1 : 1.5)	298.15	390	0.02955	0.31167	0.33528	3.03883	21.3422	13.4156	1.01635	1.19102	1.32186	0.16984	-2.6853	Training	-2.65545	0.0125388	-0.201408
[TOA]Cl-DecA (1 : 1.5)	298.15	490	0.02955	0.31167	0.33528	3.03883	21.3422	13.4156	1.01635	1.19102	1.32186	0.16984	-2.4663	Training	-2.46205	0.0125356	-0.401355
[TOA]Cl-DecA (1 : 1.5)	298.15	790	0.02955	0.31167	0.33528	3.03883	21.3422	13.4156	1.01635	1.19102	1.32186	0.16984	-2.0032	Training	-2.06958	0.012616	-1.05362
[TOA]Cl-DecA (1 : 1.5)	298.15	990	0.02955	0.31167	0.33528	3.03883	21.3422	13.4156	1.01635	1.19102	1.32186	0.16984	-1.8042	Testing	-1.85336	0.0127447	-0.763958
[TOA]Cl-DecA (1 : 1.5)	298.15	1490	0.02955	0.31167	0.33528	3.03883	21.3422	13.4156	1.01635	1.19102	1.32186	0.16984	-1.4486	Training	-1.4596	0.0133292	-0.300566
[TOA]Cl-DecA (1 : 1.5)	298.15	1990	0.02955	0.31167	0.33528	3.03883	21.3422	13.4156	1.01635	1.19102	1.32186	0.16984	-1.2056	Testing	-1.26678	0.0142889	-0.158243
[TOA]Cl-DecA (1 : 1.5)	308.15	90	0.02955	0.31167	0.33528	3.03883	21.3422	13.4156	1.01635	1.19102	1.32186	0.16984	-4.2064	Testing	-4.20448	0.0123678	0.345426
[TOA]Cl-DecA (1 : 1.5)	308.15	190	0.02955	0.31167	0.33528	3.03883	21.3422	13.4156	1.01635	1.19102	1.32186	0.16984	-3.4933	Training	-3.49897	0.0123076	0.286485
[TOA]Cl-DecA (1 : 1.5)	308.15	290	0.02955	0.31167	0.33528	3.03883	21.3422	13.4156	1.01635	1.19102	1.32186	0.16984	-3.0857	Testing	-3.04163	0.0122624	-0.0245367
[TOA]Cl-DecA (1 : 1.5)	308.15	390	0.02955	0.31167	0.33528	3.03883	21.3422	13.4156	1.01635	1.19102	1.32186	0.16984	-2.792	Training	-2.75398	0.0122322	-0.0117056
[TOA]Cl-DecA (1 : 1.5)	308.15	490	0.02955	0.31167	0.33528	3.03883	21.3422	13.4156	1.01635	1.19102	1.32186	0.16984	-2.5783	Testing	-2.55972	0.012217	-0.255714
[TOA]Cl-DecA (1 : 1.5)	308.15	690	0.02955	0.31167	0.33528	3.03883	21.3422	13.4156	1.01635	1.19102	1.32186	0.16984	-2.2538	Training	-2.2827	0.0122316	-0.89244
[TOA]Cl-DecA (1 : 1.5)	308.15	790	0.02955	0.31167	0.33528	3.03883	21.3422	13.4156	1.01635	1.19102	1.32186	0.16984	-2.1337	Training	-2.16465	0.0122615	-1.11271
[TOA]Cl-DecA (1 : 1.5)	308.15	990	0.02955	0.31167	0.33528	3.03883	21.3422	13.4156	1.01635	1.19102	1.32186	0.16984	-1.9324	Training	-1.94863	0.0123662	-0.796256
[TOA]Cl-DecA (1 : 1.5)	308.15	1190	0.02955	0.31167	0.33528	3.03883	21.3422	13.4156	1.01635	1.19102	1.32186	0.16984	-1.7702	Training	-1.76366	0.012531	-0.572247
[TOA]Cl-DecA (1 : 1.5)	308.15	1490	0.02955	0.31167	0.33528	3.03883	21.3422	13.4156	1.01635	1.19102	1.32186	0.16984	-1.5721	Training	-1.55593	0.0128907	-0.343106
[TOA]Cl-DecA (1 : 1.5)	308.15	1790	0.02955	0.31167	0.33528	3.03883	21.3422	13.4156	1.01635	1.19102	1.32186	0.16984	-1.4159	Training	-1.4189	0.0133855	-0.213035
[TOA]Cl-DecA (1 : 1.5)	308.15	1990	0.02955	0.31167	0.33528	3.03883	21.3422	13.4156	1.01635	1.19102	1.32186	0.16984	-1.3295	Training	-1.35239	0.0137905	-0.168249
[Ch]Cl-EG (1 : 2)	303.15	236	0	0.258588	1.09617	3.85012	2.89392	0.776026	0.72151	1.1821	1.88577	0.001292	-4.6831	Training	-4.7406	0.00370956	0.655725
[Ch]Cl-EG (1 : 2)	303.15	537	0	0.258588	1.09617	3.85012	2.89392	0.776026	0.72151	1.1821	1.88577	0.001292	-3.8281	Training	-3.85873	0.00331935	0.516859
[Ch]Cl-EG (1 : 2)	303.15	1004	0	0.258588	1.09617	3.85012	2.89392	0.776026	0.72151	1.1821	1.88577	0.001292	-3.2048	Training	-3.17792	0.00298312	-0.284382
[Ch]Cl-EG (1 : 2)	303.15	1923	0	0.258588	1.09617	3.85012	2.89392	0.776026	0.72151	1.1821	1.88577	0.001292	-2.552	Training	-2.54401	0.00327746	0.526207
[Ch]Cl-EG (1 : 2)	303.15	2760	0	0.258588	1.09617	3.85012	2.89392	0.776026	0.72151	1.1821	1.88577	0.001292	-2.1949	Training	-2.23151	0.00464866	0.703032
[Ch]Cl-EG (1 : 2)	303.15	3849	0	0.258588	1.09617	3.85012	2.89392	0.776026	0.72151	1.1821	1.88577	0.001292	-1.8938	Training	-1.89057	0.00800689	0.546481
[Ch]Cl-EG (1 : 2)	303.15	4971	0	0.258588	1.09617	3.85012	2.89392	0.776026	0.72151	1.1821	1.88577	0.001292	-1.6543	Training	-1.59865	0.0133288	0.217964
[Ch]Cl-EG (1 : 2)	303.15	5863	0	0.258588	1.09617	3.85012	2.89392	0.776026	0.72151	1.1821	1.88577	0.001292	-1.5343	Testing	-1.39064	0.0189081	-0.241489
[Ch]Cl-EG (1 : 2)	313.15	248	0	0.258588	1.09617	3.85012	2.89392	0.776026	0.72151	1.1821	1.88577	0.001292	-4.8549	Testing	-4.85956	0.00402163	0.557564
[Ch]Cl-EG (1 : 2)	313.15	565	0	0.258588	1.09617	3.85012	2.89392	0.776026	0.72151	1.1821	1.88577	0.001292	-4.0065	Testing	-3.99638	0.0035822	0.293538
[Ch]Cl-EG (1 : 2)	313.15	1055	0	0.258588	1.09617	3.85012	2.89392	0.776026	0.72151	1.1821	1.88577	0.001292	-3.3692	Testing	-3.34099	0.00319975	-0.491117
[Ch]Cl-EG (1 : 2)	313.15	1928	0	0.258588	1.09617	3.85012	2.89392	0.776026	0.72151	1.1821	1.88577	0.001292	-2.7693	Testing	-2.76792	0.00341142	0.216907
[Ch]Cl-EG (1 : 2)	313.15	2782	0	0.258588	1.09617	3.85012	2.89392	0.776026	0.72151	1.1821	1.88577	0.001292	-2.4006	Testing	-2.42667	0.00472542	0.40386
[Ch]Cl-EG (1 : 2)	313.15	3889	0	0.258588	1.09617	3.85012	2.89392	0.776026	0.72151	1.1821	1.88577	0.001292	-2.0676	Training	-2.08152	0.00805799	0.35311
[Ch]Cl-EG (1 : 2)	313.15	5040	0	0.258588	1.09617	3.85012	2.89392	0.776026	0.72151	1.1821	1.88577	0.001292	-1.8175	Training	-1.82303	0.0134736	0.0265289
[Ch]Cl-EG (1 : 2)	313.15	5902	0	0.258588	1.09617	3.85012	2.89392	0.776026	0.72151	1.1821	1.88577	0.001292	-1.6773	Training	-1.6454	0.0188319	-0.329424
[Ch]Cl-EG (1 : 2)	323.15	306	0	0.258588	1.09617	3.85012	2.89392	0.776026	0.72151	1.1821	1.88577	0.001292	-4.8571	Training	-4.81891	0.0044406	0.625859
[Ch]Cl-EG (1 : 2)	323.15	603	0	0.258588	1.09617	3.85012	2.89392	0.776026	0.72151	1.1821	1.88577	0.001292	-4.1613	Testing	-4.13472	0.0040147	0.100627
[Ch]Cl-EG (1 : 2)	323.15	1092	0	0.258588	1.09617	3.85012	2.89392	0.776026	0.72151	1.1821	1.88577	0.001292	-3.5624	Training	-3.53215	0.00360194	-0.701147
[Ch]Cl-EG (1 : 2)	323.15	1950	0	0.258588	1.09617	3.85012	2.89392	0.776026	0.72151	1.1821	1.88577	0.001292	-2.9899	Testing	-2.98944	0.00374514	-0.0670789
[Ch]Cl-EG (1 : 2)	323.15	2833	0	0.258588	1.09617	3.85012	2.89392	0.776026	0.72151	1.1821	1.88577	0.001292	-2.6063	Training	-2.62267	0.00504631	0.171024
[Ch]Cl-EG (1 : 2)	323.15	3948	0	0.258588	1.09617	3.85012	2.89392	0.776026	0.72151	1.1821	1.88577	0.001292	-2.2611	Training	-2.28446	0.00836139	0.0980083
[Ch]Cl-EG (1 : 2)	323.15	5110	0	0.258588	1.09617	3.85012	2.89392	0.776026	0.72151	1.1821	1.88577	0.001292	-2.0188	Training	-2.05956	0.013802	-0.255788
[Ch]Cl-EG (1 : 2)	323.15	6167	0	0.258588	1.09617	3.85012	2.89392	0.776026	0.72151	1.1821	1.88577	0.001292	-1.8234	Training	-1.85815	0.0205115	-0.636738
[Ch]Cl-EG (1 : 2)	333.15	332	0	0.258588	1.09617	3.85012	2.89392	0.776026	0.72151	1.1821	1.88577	0.001292	-4.9867	Training	-4.93497	0.00509291	0.5748
[Ch]Cl-EG (1 : 2)	333.15	637	0	0.258588	1.09617	3.85012	2.89392	0.776026	0.72151	1.1821	1.88577	0.001292	-4.322	Testing	-4.29375	0.00463272	-0.0778142
[Ch]Cl-EG (1 : 2)	333.15	1094	0	0.258588	1.09617	3.85012	2.89392	0.776026	0.72151	1.1821	1.88577	0.001292	-3.7839	Training	-3.75932	0.00420455	-0.976995
[Ch]Cl-EG (1 : 2)	333.15	1948	0	0.258588	1.09617	3.85012	2.89392	0.776026	0.72151	1.1821	1.88577	0.001292	-3.1995	Training	-3.21992	0.00424473	-0.276296
[Ch]Cl-EG (1 : 2)	333.15	2831	0	0.258588	1.09617	3.85012	2.89392	0.776026	0.72151	1.1821	1.88577	0.001292	-2.8406	Training	-2.83955	0.00543743	-0.131899
[Ch]Cl-EG (1 : 2)	333.15	3944	0	0.258588	1.09617	3.85012	2.89392	0.776026	0.72151	1.1821	1.88577	0.001292	-2.5396	Training	-2.50338	0.00860816	-0.307827
[Ch]Cl-EG (1 : 2)	333.15	5188	0	0.258588	1.09617	3.85012	2.89392	0.776026	0.72151	1.1821	1.88577	0.001292	-2.2286	Training	-2.29053	0.0143527	-0.564583
[Ch]Cl-EG (1 : 2)	333.15	6104	0	0.258588	1.09617	3.85012	2.89392	0.776026	0.72151	1.1821	1.88577	0.001292	-2.1026	Testing	-2.12827	0.0200677	-1.01354
[Ch]Cl-EG (1 : 2)	343.15	378	0	0.258588	1.09617	3.85012	2.89392	0.776026	0.72151	1.1821	1.88577	0.001292	-5.0743	Testing	-5.01044	0.00589129	0.434157
[Ch]Cl-EG (1 : 2)	343.15	659	0	0.258588	1.09617	3.85012	2.89392	0.776026	0.72151	1.1821	1.88577	0.001292	-4.5193	Testing	-4.47472	0.00544797	-0.256654
[Ch]Cl-EG (1 : 2)	343.15	1113	0	0.258588	1.09617	3.85012	2.89392	0.776026	0.72151	1.1821	1.88577	0.001292	-4.0051	Testing	-3.96475	0.00498218	-1.27678
[Ch]Cl-EG (1 : 2)	343.15	1960	0	0.258588	1.09617	3.85012	2.89392	0.776026	0.72151	1.1821	1.88577	0.001292	-3.4576	Training	-3.43116	0.00494022	-0.646656
[Ch]Cl-EG (1 : 2)	343.15	2862	0	0.258588	1.09617	3.85012	2.89392	0.776026	0.72151	1.1821	1.88577	0.001292	-3.0788	Testing	-3.03193	0.00607959	-0.497058
[Ch]Cl-EG (1 : 2)	343.15	4024	0	0.258588	1.09617	3.85012	2.89392	0.776026	0.72151	1.1821	1.88577	0.001292	-2.7417	Training	-2.69089	0.00934746	-0.60001
[Ch]Cl-EG (1 : 2)	343.15	5267	0	0.258588	1.09617	3.85012	2.89392	0.776026	0.72151	1.1821	1.88577	0.001292	-2.4796	Testing	-2.50492	0.0150868	-0.98845
[Ch]Cl-EG (1 : 2)	343.15	6323	0	0.258588	1.09617	3.85012	2.89392	0.776026	0.72151	1.1821	1.88577	0.001292	-2.3367	Training	-2.3231	0.0217848	-1.47587
[TOA]Br-DecA (1 : 2)	298.15	90	0.032505	0.342837	0.357628	2.86089	20.0166	12.4257	1.00395	1.4713	1.30073	0	-4.1734	Training	-4.19528	0.0096324	0.111849
[TOA]Br-DecA (1 : 2)	298.15	190	0.032505	0.342837	0.357628	2.86089	20.0166	12.4257	1.00395	1.4713	1.30073	0	-3.4389	Testing	-3.52431	0.00946681	0.0228383
[TOA]Br-DecA (1 : 2)	298.15	290	0.032505	0.342837	0.357628	2.86089	20.0166	12.4257	1.00395	1.4713	1.30073	0	-3.02	Testing	-3.08004	0.00931623	-0.127367
[TOA]Br-DecA (1 : 2)	298.15	390	0.032505	0.342837	0.357628	2.86089	20.0166	12.4257	1.00395	1.4713	1.30073	0	-2.7426	Testing	-2.78077	0.00918066	-0.188019
[TOA]Br-DecA (1 : 2)	298.15	490	0.032505	0.342837	0.357628	2.86089	20.0166	12.4257	1.00395	1.4713	1.30073	0	-2.5396	Testing	-2.56157	0.00906011	-0.42113
[TOA]Br-DecA (1 : 2)	298.15	790	0.032505	0.342837	0.357628	2.86089	20.0166	12.4257	1.00395	1.4713	1.30073	0	-2.0778	Training	-2.09811	0.0087885	-1.08712
[TOA]Br-DecA (1 : 2)	298.15	990	0.032505	0.342837	0.357628	2.86089	20.0166	12.4257	1.00395	1.4713	1.30073	0	-1.8702	Training	-1.86628	0.00868248	-0.75577
[TOA]Br-DecA (1 : 2)	298.15	1490	0.032505	0.342837	0.357628	2.86089	20.0166	12.4257	1.00395	1.4713	1.30073	0	-1.51	Testing	-1.45806	0.00868012	-0.332843
[TOA]Br-DecA (1 : 2)	298.15	1990	0.032505	0.342837	0.357628	2.86089	20.0166	12.4257	1.00395	1.4713	1.30073	0	-1.2605	Testing	-1.19137	0.00905304	-0.145422
[TOA]Br-DecA (1 : 2)	308.15	90	0.032505	0.342837	0.357628	2.86089	20.0166	12.4257	1.00395	1.4713	1.30073	0	-4.2977	Training	-4.2958	0.00980218	0.328485
[TOA]Br-DecA (1 : 2)	308.15	190	0.032505	0.342837	0.357628	2.86089	20.0166	12.4257	1.00395	1.4713	1.30073	0	-3.5756	Testing	-3.62645	0.00962461	0.20648
[TOA]Br-DecA (1 : 2)	308.15	290	0.032505	0.342837	0.357628	2.86089	20.0166	12.4257	1.00395	1.4713	1.30073	0	-3.1725	Testing	-3.18411	0.00946204	-0.0475528
[TOA]Br-DecA (1 : 2)	308.15	390	0.032505	0.342837	0.357628	2.86089	20.0166	12.4257	1.00395	1.4713	1.30073	0	-2.8842	Training	-2.88723	0.00931449	-0.0479504
[TOA]Br-DecA (1 : 2)	308.15	490	0.032505	0.342837	0.357628	2.86089	20.0166	12.4257	1.00395	1.4713	1.30073	0	-2.6679	Training	-2.67117	0.00918195	-0.254282
[TOA]Br-DecA (1 : 2)	308.15	790	0.032505	0.342837	0.357628	2.86089	20.0166	12.4257	1.00395	1.4713	1.30073	0	-2.2146	Training	-2.22202	0.00887438	-1.16111
[TOA]Br-DecA (1 : 2)	308.15	990	0.032505	0.342837	0.357628	2.86089	20.0166	12.4257	1.00395	1.4713	1.30073	0	-2.0047	Training	-2.00152	0.0087444	-0.824319
[TOA]Br-DecA (1 : 2)	308.15	1490	0.032505	0.342837	0.357628	2.86089	20.0166	12.4257	1.00395	1.4713	1.30073	0	-1.6394	Testing	-1.6136	0.00868211	-0.388225
[TOA]Br-DecA (1 : 2)	308.15	1990	0.032505	0.342837	0.357628	2.86089	20.0166	12.4257	1.00395	1.4713	1.30073	0	-1.3899	Training	-1.34737	0.0089951	-0.168176
[TOA]Br-DecA (1 : 2)	323.15	90	0.032505	0.342837	0.357628	2.86089	20.0166	12.4257	1.00395	1.4713	1.30073	0	-4.4741	Testing	-4.46126	0.0104081	0.627985
[TOA]Br-DecA (1 : 2)	323.15	190	0.032505	0.342837	0.357628	2.86089	20.0166	12.4257	1.00395	1.4713	1.30073	0	-3.7423	Testing	-3.79283	0.0102126	0.570839
[TOA]Br-DecA (1 : 2)	323.15	290	0.032505	0.342837	0.357628	2.86089	20.0166	12.4257	1.00395	1.4713	1.30073	0	-3.3439	Training	-3.35188	0.0100321	0.24586
[TOA]Br-DecA (1 : 2)	323.15	390	0.032505	0.342837	0.357628	2.86089	20.0166	12.4257	1.00395	1.4713	1.30073	0	-3.0576	Training	-3.05707	0.00986652	0.205038
[TOA]Br-DecA (1 : 2)	323.15	490	0.032505	0.342837	0.357628	2.86089	20.0166	12.4257	1.00395	1.4713	1.30073	0	-2.8387	Training	-2.84411	0.009716	0.00485399
[TOA]Br-DecA (1 : 2)	323.15	790	0.032505	0.342837	0.357628	2.86089	20.0166	12.4257	1.00395	1.4713	1.30073	0	-2.386	Testing	-2.40977	0.00935451	-1.09281
[TOA]Br-DecA (1 : 2)	323.15	990	0.032505	0.342837	0.357628	2.86089	20.0166	12.4257	1.00395	1.4713	1.30073	0	-2.176	Training	-2.2	0.00918857	-0.855147
[TOA]Br-DecA (1 : 2)	323.15	1490	0.032505	0.342837	0.357628	2.86089	20.0166	12.4257	1.00395	1.4713	1.30073	0	-1.8091	Testing	-1.82254	0.0090364	-0.414738
[TOA]Br-DecA (1 : 2)	323.15	1990	0.032505	0.342837	0.357628	2.86089	20.0166	12.4257	1.00395	1.4713	1.30073	0	-1.5549	Training	-1.53785	0.0092595	-0.184108
[TOA]Cl-DecA (1 : 2)	298.15	90	0.032505	0.342837	0.328473	2.77402	19.9623	12.5631	1.04849	1.26189	1.1449	0.144364	-4.1734	Training	-4.202	0.00989135	0.0857408
[TOA]Cl-DecA (1 : 2)	298.15	190	0.032505	0.342837	0.328473	2.77402	19.9623	12.5631	1.04849	1.26189	1.1449	0.144364	-3.4546	Training	-3.48414	0.00981839	-0.00328595
[TOA]Cl-DecA (1 : 2)	298.15	290	0.032505	0.342837	0.328473	2.77402	19.9623	12.5631	1.04849	1.26189	1.1449	0.144364	-3.0262	Testing	-3.01424	0.00976044	-0.167712
[TOA]Cl-DecA (1 : 2)	298.15	390	0.032505	0.342837	0.328473	2.77402	19.9623	12.5631	1.04849	1.26189	1.1449	0.144364	-2.7411	Training	-2.71326	0.0097175	-0.178081
[TOA]Cl-DecA (1 : 2)	298.15	490	0.032505	0.342837	0.328473	2.77402	19.9623	12.5631	1.04849	1.26189	1.1449	0.144364	-2.5295	Testing	-2.50577	0.00968958	-0.423692
[TOA]Cl-DecA (1 : 2)	298.15	690	0.032505	0.342837	0.328473	2.77402	19.9623	12.5631	1.04849	1.26189	1.1449	0.144364	-2.1982	Testing	-2.20608	0.00967876	-1.06307
[TOA]Cl-DecA (1 : 2)	298.15	790	0.032505	0.342837	0.328473	2.77402	19.9623	12.5631	1.04849	1.26189	1.1449	0.144364	-2.0754	Training	-2.07956	0.00969586	-1.13733
[TOA]Cl-DecA (1 : 2)	298.15	990	0.032505	0.342837	0.328473	2.77402	19.9623	12.5631	1.04849	1.26189	1.1449	0.144364	-1.8663	Training	-1.85274	0.00977511	-0.802429
[TOA]Cl-DecA (1 : 2)	298.15	1190	0.032505	0.342837	0.328473	2.77402	19.9623	12.5631	1.04849	1.26189	1.1449	0.144364	-1.7027	Training	-1.66365	0.0099144	-0.57511
[TOA]Cl-DecA (1 : 2)	298.15	1490	0.032505	0.342837	0.328473	2.77402	19.9623	12.5631	1.04849	1.26189	1.1449	0.144364	-1.5037	Testing	-1.45638	0.0102359	-0.373022
[TOA]Cl-DecA (1 : 2)	298.15	1790	0.032505	0.342837	0.328473	2.77402	19.9623	12.5631	1.04849	1.26189	1.1449	0.144364	-1.3448	Training	-1.32161	0.0106925	-0.207385
[TOA]Cl-DecA (1 : 2)	298.15	1990	0.032505	0.342837	0.328473	2.77402	19.9623	12.5631	1.04849	1.26189	1.1449	0.144364	-1.2577	Training	-1.25595	0.011072	-0.160945
[TOA]Cl-DecA (1 : 2)	308.15	90	0.032505	0.342837	0.328473	2.77402	19.9623	12.5631	1.04849	1.26189	1.1449	0.144364	-4.2759	Training	-4.30496	0.00985316	0.353922
[TOA]Cl-DecA (1 : 2)	308.15	190	0.032505	0.342837	0.328473	2.77402	19.9623	12.5631	1.04849	1.26189	1.1449	0.144364	-3.572	Training	-3.59103	0.00976821	0.229665
[TOA]Cl-DecA (1 : 2)	308.15	290	0.032505	0.342837	0.328473	2.77402	19.9623	12.5631	1.04849	1.26189	1.1449	0.144364	-3.1653	Testing	-3.12438	0.00969828	-0.0568368
[TOA]Cl-DecA (1 : 2)	308.15	390	0.032505	0.342837	0.328473	2.77402	19.9623	12.5631	1.04849	1.26189	1.1449	0.144364	-2.8612	Testing	-2.82586	0.00964336	-0.0555972
[TOA]Cl-DecA (1 : 2)	308.15	490	0.032505	0.342837	0.328473	2.77402	19.9623	12.5631	1.04849	1.26189	1.1449	0.144364	-2.6451	Training	-2.62041	0.00960345	-0.226867
[TOA]Cl-DecA (1 : 2)	308.15	690	0.032505	0.342837	0.328473	2.77402	19.9623	12.5631	1.04849	1.26189	1.1449	0.144364	-2.3351	Training	-2.32494	0.00956866	-0.929406
[TOA]Cl-DecA (1 : 2)	308.15	790	0.032505	0.342837	0.328473	2.77402	19.9623	12.5631	1.04849	1.26189	1.1449	0.144364	-2.2027	Training	-2.20102	0.00957378	-1.18885
[TOA]Cl-DecA (1 : 2)	308.15	990	0.032505	0.342837	0.328473	2.77402	19.9623	12.5631	1.04849	1.26189	1.1449	0.144364	-1.9988	Training	-1.98031	0.00962906	-0.866249
[TOA]Cl-DecA (1 : 2)	308.15	1190	0.032505	0.342837	0.328473	2.77402	19.9623	12.5631	1.04849	1.26189	1.1449	0.144364	-1.8295	Training	-1.79727	0.00974438	-0.625453
[TOA]Cl-DecA (1 : 2)	308.15	1490	0.032505	0.342837	0.328473	2.77402	19.9623	12.5631	1.04849	1.26189	1.1449	0.144364	-1.6296	Training	-1.59525	0.0100299	-0.392056
[TOA]Cl-DecA (1 : 2)	308.15	1790	0.032505	0.342837	0.328473	2.77402	19.9623	12.5631	1.04849	1.26189	1.1449	0.144364	-1.474	Training	-1.45933	0.0104506	-0.263403
[TOA]Cl-DecA (1 : 2)	308.15	1990	0.032505	0.342837	0.328473	2.77402	19.9623	12.5631	1.04849	1.26189	1.1449	0.144364	-1.3823	Training	-1.39004	0.0108061	-0.206086
[Ach]Cl-Imidazole (1 : 2)	303.15	26.6	0.000693	0.415569	0.992502	4.00307	2.98952	1.94044	1.2559	1.06751	1.5322	0.150299	-6.2659	Training	-6.25611	0.00578556	0.0761725
[Ach]Cl-Imidazole (1 : 2)	303.15	57.2	0.000693	0.415569	0.992502	4.00307	2.98952	1.94044	1.2559	1.06751	1.5322	0.150299	-5.684	Testing	-5.94673	0.0057673	0.851041
[Ach]Cl-Imidazole (1 : 2)	303.15	93.2	0.000693	0.415569	0.992502	4.00307	2.98952	1.94044	1.2559	1.06751	1.5322	0.150299	-5.2983	Training	-5.60672	0.00574763	1.17279
[Ach]Cl-Imidazole (1 : 2)	303.15	141.4	0.000693	0.415569	0.992502	4.00307	2.98952	1.94044	1.2559	1.06751	1.5322	0.150299	-4.9063	Testing	-5.20276	0.00572433	1.17734
[Ach]Cl-Imidazole (1 : 2)	303.15	240	0.000693	0.415569	0.992502	4.00307	2.98952	1.94044	1.2559	1.06751	1.5322	0.150299	-4.3982	Testing	-4.57428	0.00568753	1.00326
[Ach]Cl-Imidazole (1 : 2)	303.15	331.4	0.000693	0.415569	0.992502	4.00307	2.98952	1.94044	1.2559	1.06751	1.5322	0.150299	-4.1105	Training	-4.19264	0.00566645	1.0842
[Ach]Cl-Imidazole (1 : 2)	303.15	422	0.000693	0.415569	0.992502	4.00307	2.98952	1.94044	1.2559	1.06751	1.5322	0.150299	-3.8922	Testing	-3.93875	0.00565794	0.895494
[Ach]Cl-Imidazole (1 : 2)	303.15	525.7	0.000693	0.415569	0.992502	4.00307	2.98952	1.94044	1.2559	1.06751	1.5322	0.150299	-3.705	Training	-3.73171	0.00566331	0.648374
[Ach]Cl-Imidazole (1 : 2)	303.15	578.5	0.000693	0.415569	0.992502	4.00307	2.98952	1.94044	1.2559	1.06751	1.5322	0.150299	-3.6156	Training	-3.64461	0.00567225	0.480779
[Ach]Cl-Imidazole (1 : 2)	313.15	29.6	0.000693	0.415569	0.992502	4.00307	2.98952	1.94044	1.2559	1.06751	1.5322	0.150299	-6.9078	Training	-6.39695	0.00523263	-0.984669
[Ach]Cl-Imidazole (1 : 2)	313.15	59.9	0.000693	0.415569	0.992502	4.00307	2.98952	1.94044	1.2559	1.06751	1.5322	0.150299	-6.0323	Testing	-6.09295	0.00521105	0.496847
[Ach]Cl-Imidazole (1 : 2)	313.15	100	0.000693	0.415569	0.992502	4.00307	2.98952	1.94044	1.2559	1.06751	1.5322	0.150299	-5.5468	Training	-5.71988	0.00518461	0.974148
[Ach]Cl-Imidazole (1 : 2)	313.15	149.8	0.000693	0.415569	0.992502	4.00307	2.98952	1.94044	1.2559	1.06751	1.5322	0.150299	-5.1673	Testing	-5.31415	0.00515514	0.925562
[Ach]Cl-Imidazole (1 : 2)	313.15	242.3	0.000693	0.415569	0.992502	4.00307	2.98952	1.94044	1.2559	1.06751	1.5322	0.150299	-4.6995	Training	-4.73949	0.00511028	0.773064
[Ach]Cl-Imidazole (1 : 2)	313.15	335.8	0.000693	0.415569	0.992502	4.00307	2.98952	1.94044	1.2559	1.06751	1.5322	0.150299	-4.382	Training	-4.35502	0.00507798	0.852666
[Ach]Cl-Imidazole (1 : 2)	313.15	426.5	0.000693	0.415569	0.992502	4.00307	2.98952	1.94044	1.2559	1.06751	1.5322	0.150299	-4.1477	Training	-4.10402	0.00505919	0.755645
[Ach]Cl-Imidazole (1 : 2)	313.15	529.8	0.000693	0.415569	0.992502	4.00307	2.98952	1.94044	1.2559	1.06751	1.5322	0.150299	-3.9425	Testing	-3.89726	0.00505283	0.453654
[Ach]Cl-Imidazole (1 : 2)	313.15	588.2	0.000693	0.415569	0.992502	4.00307	2.98952	1.94044	1.2559	1.06751	1.5322	0.150299	-3.8351	Training	-3.79974	0.00505633	0.334153
[Ach]Cl-Imidazole (1 : 2)	323.15	27.5	0.000693	0.415569	0.992502	4.00307	2.98952	1.94044	1.2559	1.06751	1.5322	0.150299	-7.0131	Training	-6.60945	0.00487071	-0.685549
[Ach]Cl-Imidazole (1 : 2)	323.15	88.3	0.000693	0.415569	0.992502	4.00307	2.98952	1.94044	1.2559	1.06751	1.5322	0.150299	-5.8091	Testing	-6.01698	0.00482133	1.01676
[Ach]Cl-Imidazole (1 : 2)	323.15	142.6	0.000693	0.415569	0.992502	4.00307	2.98952	1.94044	1.2559	1.06751	1.5322	0.150299	-5.3602	Training	-5.56184	0.00478191	1.16395
[Ach]Cl-Imidazole (1 : 2)	323.15	232.3	0.000693	0.415569	0.992502	4.00307	2.98952	1.94044	1.2559	1.06751	1.5322	0.150299	-4.9063	Testing	-4.98526	0.0047265	0.746278
[Ach]Cl-Imidazole (1 : 2)	323.15	331.6	0.000693	0.415569	0.992502	4.00307	2.98952	1.94044	1.2559	1.06751	1.5322	0.150299	-4.5659	Testing	-4.56245	0.00467924	0.836587
[Ach]Cl-Imidazole (1 : 2)	323.15	424.1	0.000693	0.415569	0.992502	4.00307	2.98952	1.94044	1.2559	1.06751	1.5322	0.150299	-4.3275	Testing	-4.30073	0.00464853	0.738308
[Ach]Cl-Imidazole (1 : 2)	323.15	526.8	0.000693	0.415569	0.992502	4.00307	2.98952	1.94044	1.2559	1.06751	1.5322	0.150299	-4.1044	Testing	-4.08962	0.00462949	0.532789
[Ach]Cl-Imidazole (1 : 2)	323.15	587.1	0.000693	0.415569	0.992502	4.00307	2.98952	1.94044	1.2559	1.06751	1.5322	0.150299	-4.0063	Training	-3.98563	0.00462568	0.379245
[Ach]Cl-Imidazole (1 : 2)	333.15	30.6	0.000693	0.415569	0.992502	4.00307	2.98952	1.94044	1.2559	1.06751	1.5322	0.150299	-7.0131	Testing	-6.78293	0.00469158	-0.261867
[Ach]Cl-Imidazole (1 : 2)	333.15	60.2	0.000693	0.415569	0.992502	4.00307	2.98952	1.94044	1.2559	1.06751	1.5322	0.150299	-6.3771	Training	-6.48721	0.00466343	0.743891
[Ach]Cl-Imidazole (1 : 2)	333.15	99	0.000693	0.415569	0.992502	4.00307	2.98952	1.94044	1.2559	1.06751	1.5322	0.150299	-5.9145	Testing	-6.12707	0.00462853	1.08533
[Ach]Cl-Imidazole (1 : 2)	333.15	148.6	0.000693	0.415569	0.992502	4.00307	2.98952	1.94044	1.2559	1.06751	1.5322	0.150299	-5.5468	Testing	-5.7227	0.00458721	1.06795
[Ach]Cl-Imidazole (1 : 2)	333.15	235.9	0.000693	0.415569	0.992502	4.00307	2.98952	1.94044	1.2559	1.06751	1.5322	0.150299	-5.0832	Testing	-5.17232	0.00452344	0.7442
[Ach]Cl-Imidazole (1 : 2)	333.15	339.2	0.000693	0.415569	0.992502	4.00307	2.98952	1.94044	1.2559	1.06751	1.5322	0.150299	-4.7217	Training	-4.7409	0.00446277	0.909041
[Ach]Cl-Imidazole (1 : 2)	333.15	429.2	0.000693	0.415569	0.992502	4.00307	2.98952	1.94044	1.2559	1.06751	1.5322	0.150299	-4.4918	Training	-4.48921	0.00442296	0.806641
[Ach]Cl-Imidazole (1 : 2)	333.15	536.5	0.000693	0.415569	0.992502	4.00307	2.98952	1.94044	1.2559	1.06751	1.5322	0.150299	-4.2687	Training	-4.26736	0.0043914	0.563992
[Ach]Cl-Imidazole (1 : 2)	333.15	589.9	0.000693	0.415569	0.992502	4.00307	2.98952	1.94044	1.2559	1.06751	1.5322	0.150299	-4.1734	Testing	-4.17315	0.00438213	0.362143
[Ch]Cl-Urea (1 : 2)	313.15	1130	0	0.523809	1.90949	3.096	1.56587	0.968119	0.73933	1.27905	2.12809	0.016637	-2.5639	Training	-2.68939	0.0108642	2.19191
[Ch]Cl-Urea (1 : 2)	313.15	2850	0	0.523809	1.90949	3.096	1.56587	0.968119	0.73933	1.27905	2.12809	0.016637	-1.8971	Training	-2.08992	0.0108999	2.39681
[Ch]Cl-Urea (1 : 2)	313.15	4370	0	0.523809	1.90949	3.096	1.56587	0.968119	0.73933	1.27905	2.12809	0.016637	-1.6555	Training	-1.88734	0.0146278	1.75585
[Ch]Cl-Urea (1 : 2)	313.15	6230	0	0.523809	1.90949	3.096	1.56587	0.968119	0.73933	1.27905	2.12809	0.016637	-1.4567	Testing	-1.77078	0.023908	0.692046
[Ch]Cl-Urea (1 : 2)	323.15	1010	0	0.523809	1.90949	3.096	1.56587	0.968119	0.73933	1.27905	2.12809	0.016637	-2.8134	Training	-2.99836	0.0109113	1.94716
[Ch]Cl-Urea (1 : 2)	323.15	2240	0	0.523809	1.90949	3.096	1.56587	0.968119	0.73933	1.27905	2.12809	0.016637	-2.2349	Training	-2.38168	0.0101155	2.33405
[Ch]Cl-Urea (1 : 2)	323.15	3170	0	0.523809	1.90949	3.096	1.56587	0.968119	0.73933	1.27905	2.12809	0.016637	-2.025	Testing	-2.22175	0.0110216	2.01174
[Ch]Cl-Urea (1 : 2)	323.15	4740	0	0.523809	1.90949	3.096	1.56587	0.968119	0.73933	1.27905	2.12809	0.016637	-1.7148	Testing	-1.94176	0.0154969	1.50329
[Ch]Cl-Urea (1 : 2)	333.15	1000	0	0.523809	1.90949	3.096	1.56587	0.968119	0.73933	1.27905	2.12809	0.016637	-2.9759	Training	-3.22922	0.0109995	1.82038
[Ch]Cl-Urea (1 : 2)	333.15	2360	0	0.523809	1.90949	3.096	1.56587	0.968119	0.73933	1.27905	2.12809	0.016637	-2.3126	Testing	-2.59539	0.010069	2.22295
[Ch]Cl-Urea (1 : 2)	333.15	4800	0	0.523809	1.90949	3.096	1.56587	0.968119	0.73933	1.27905	2.12809	0.016637	-1.8643	Testing	-2.03958	0.0153584	1.35441
[Ch]Cl-Urea (1 : 2)	333.15	6310	0	0.523809	1.90949	3.096	1.56587	0.968119	0.73933	1.27905	2.12809	0.016637	-1.6195	Training	-1.85854	0.0231084	0.792749
BTEACl-AC (1 : 2)	298.15	325	0.042768	0.338019	0.372437	4.35719	4.27487	2.16733	1.00315	1.28923	1.32957	0.043214	-4.2733	Testing	-4.07308	0.00737943	-0.279786
BTEACl-AC (1 : 2)	298.15	551	0.042768	0.338019	0.372437	4.35719	4.27487	2.16733	1.00315	1.28923	1.32957	0.043214	-3.5528	Testing	-3.48369	0.00720027	-0.199948
BTEACl-AC (1 : 2)	298.15	957	0.042768	0.338019	0.372437	4.35719	4.27487	2.16733	1.00315	1.28923	1.32957	0.043214	-3.1157	Testing	-2.87948	0.007071	-1.13471
BTEACl-AC (1 : 2)	298.15	1377	0.042768	0.338019	0.372437	4.35719	4.27487	2.16733	1.00315	1.28923	1.32957	0.043214	-2.779	Testing	-2.49865	0.00719765	-0.682607
BTEACl-AC (1 : 2)	298.15	1664	0.042768	0.338019	0.372437	4.35719	4.27487	2.16733	1.00315	1.28923	1.32957	0.043214	-2.5215	Training	-2.32582	0.00743649	-0.279668
BTEACl-AC (1 : 2)	298.15	2054	0.042768	0.338019	0.372437	4.35719	4.27487	2.16733	1.00315	1.28923	1.32957	0.043214	-2.3249	Testing	-2.15352	0.00795921	-0.159308
BTMACl-AC (1 : 2)	298.15	219	0.042768	0.338019	0.624105	3.82192	3.70689	1.85102	0.931584	1.33443	1.33157	0.009418	-4.889	Training	-4.78384	0.00542795	-0.698087
BTMACl-AC (1 : 2)	298.15	530	0.042768	0.338019	0.624105	3.82192	3.70689	1.85102	0.931584	1.33443	1.33157	0.009418	-3.662	Training	-3.68387	0.00500591	-0.0291657
BTMACl-AC (1 : 2)	298.15	886	0.042768	0.338019	0.624105	3.82192	3.70689	1.85102	0.931584	1.33443	1.33157	0.009418	-2.7357	Testing	-3.02822	0.00470103	-0.000422931
BTMACl-AC (1 : 2)	298.15	1141	0.042768	0.338019	0.624105	3.82192	3.70689	1.85102	0.931584	1.33443	1.33157	0.009418	-2.4827	Training	-2.68975	0.00459959	0.431051
BTMACl-AC (1 : 2)	298.15	1563	0.042768	0.338019	0.624105	3.82192	3.70689	1.85102	0.931584	1.33443	1.33157	0.009418	-2.3302	Testing	-2.29331	0.00464613	0.410221
BTMACl-AC (1 : 2)	298.15	1874	0.042768	0.338019	0.624105	3.82192	3.70689	1.85102	0.931584	1.33443	1.33157	0.009418	-2.1816	Testing	-2.08943	0.00485153	0.511523
BTMACl-AC (1 : 2)	298.15	2037	0.042768	0.338019	0.624105	3.82192	3.70689	1.85102	0.931584	1.33443	1.33157	0.009418	-2.0883	Testing	-2.00293	0.00501717	0.600352
BTMACl-GLY (1 : 2)	298.15	394	0.002706	0.234267	0.961233	4.66563	3.9796	2.04893	0.92175	1.13699	1.92944	0.009418	-5.4331	Testing	-5.46016	0.00751807	-2.7805
BTMACl-GLY (1 : 2)	298.15	672	0.002706	0.234267	0.961233	4.66563	3.9796	2.04893	0.92175	1.13699	1.92944	0.009418	-5.0209	Training	-4.875	0.00721716	-3.82025
BTMACl-GLY (1 : 2)	298.15	999	0.002706	0.234267	0.961233	4.66563	3.9796	2.04893	0.92175	1.13699	1.92944	0.009418	-4.4866	Training	-4.37562	0.00701169	-3.66841
BTMACl-GLY (1 : 2)	298.15	1345	0.002706	0.234267	0.961233	4.66563	3.9796	2.04893	0.92175	1.13699	1.92944	0.009418	-3.8842	Training	-3.98607	0.00696906	-2.52002
BTMACl-GLY (1 : 2)	298.15	1711	0.002706	0.234267	0.961233	4.66563	3.9796	2.04893	0.92175	1.13699	1.92944	0.009418	-3.6412	Testing	-3.70914	0.00711955	-2.22938
BTMACl-GLY (1 : 2)	298.15	2026	0.002706	0.234267	0.961233	4.66563	3.9796	2.04893	0.92175	1.13699	1.92944	0.009418	-3.513	Testing	-3.5392	0.00741007	-2.17849
ChCl-Phenol (1 : 2)	293.15	99	0.031878	0.365013	0.762537	4.21038	2.74955	2.429	2.1419	0.939945	1.24956	0.001292	-5.5728	Testing	-5.58266	0.00460452	-0.410871
ChCl-Phenol (1 : 2)	293.15	197.2	0.031878	0.365013	0.762537	4.21038	2.74955	2.429	2.1419	0.939945	1.24956	0.001292	-4.8665	Training	-4.87244	0.00453435	-0.468835
ChCl-Phenol (1 : 2)	293.15	303.1	0.031878	0.365013	0.762537	4.21038	2.74955	2.429	2.1419	0.939945	1.24956	0.001292	-4.3741	Training	-4.37389	0.00447491	-0.088332
ChCl-Phenol (1 : 2)	293.15	397	0.031878	0.365013	0.762537	4.21038	2.74955	2.429	2.1419	0.939945	1.24956	0.001292	-4.1166	Training	-4.08792	0.00443628	-0.153466
ChCl-Phenol (1 : 2)	293.15	494.5	0.031878	0.365013	0.762537	4.21038	2.74955	2.429	2.1419	0.939945	1.24956	0.001292	-3.8728	Testing	-3.87617	0.00441017	-0.307328
ChCl-Phenol (1 : 2)	303.15	104.3	0.031878	0.365013	0.762537	4.21038	2.74955	2.429	2.1419	0.939945	1.24956	0.001292	-5.5994	Training	-5.71148	0.00392881	-0.0296013
ChCl-Phenol (1 : 2)	303.15	198.2	0.031878	0.365013	0.762537	4.21038	2.74955	2.429	2.1419	0.939945	1.24956	0.001292	-4.9477	Testing	-5.03632	0.0038509	-0.200806
ChCl-Phenol (1 : 2)	303.15	295.5	0.031878	0.365013	0.762537	4.21038	2.74955	2.429	2.1419	0.939945	1.24956	0.001292	-4.5564	Testing	-4.56742	0.00378414	-0.0583109
ChCl-Phenol (1 : 2)	303.15	400.6	0.031878	0.365013	0.762537	4.21038	2.74955	2.429	2.1419	0.939945	1.24956	0.001292	-4.2904	Testing	-4.2384	0.00372799	-0.181275
ChCl-Phenol (1 : 2)	303.15	510.1	0.031878	0.365013	0.762537	4.21038	2.74955	2.429	2.1419	0.939945	1.24956	0.001292	-4.0745	Training	-4.00051	0.00368713	-0.423719
ChCl-Phenol (1 : 2)	313.15	121.8	0.031878	0.365013	0.762537	4.21038	2.74955	2.429	2.1419	0.939945	1.24956	0.001292	-5.7138	Testing	-5.76761	0.00342699	-0.136472
ChCl-Phenol (1 : 2)	313.15	217.8	0.031878	0.365013	0.762537	4.21038	2.74955	2.429	2.1419	0.939945	1.24956	0.001292	-5.116	Testing	-5.12185	0.00333851	-0.37541
ChCl-Phenol (1 : 2)	313.15	322	0.031878	0.365013	0.762537	4.21038	2.74955	2.429	2.1419	0.939945	1.24956	0.001292	-4.6995	Testing	-4.66308	0.00325813	-0.14318
ChCl-Phenol (1 : 2)	313.15	417.4	0.031878	0.365013	0.762537	4.21038	2.74955	2.429	2.1419	0.939945	1.24956	0.001292	-4.4145	Training	-4.38428	0.00319883	-0.120277
ChCl-Phenol (1 : 2)	313.15	503	0.031878	0.365013	0.762537	4.21038	2.74955	2.429	2.1419	0.939945	1.24956	0.001292	-4.2064	Training	-4.19691	0.00315725	-0.24264
ChCl-Phenol (1 : 2)	323.15	115.2	0.031878	0.365013	0.762537	4.21038	2.74955	2.429	2.1419	0.939945	1.24956	0.001292	-6.0323	Training	-6.04728	0.00313544	-0.227044
ChCl-Phenol (1 : 2)	323.15	216.5	0.031878	0.365013	0.762537	4.21038	2.74955	2.429	2.1419	0.939945	1.24956	0.001292	-5.3391	Training	-5.35201	0.00302933	-0.399851
ChCl-Phenol (1 : 2)	323.15	320	0.031878	0.365013	0.762537	4.21038	2.74955	2.429	2.1419	0.939945	1.24956	0.001292	-4.9762	Testing	-4.88918	0.00293683	-0.33719
ChCl-Phenol (1 : 2)	323.15	424.8	0.031878	0.365013	0.762537	4.21038	2.74955	2.429	2.1419	0.939945	1.24956	0.001292	-4.6777	Training	-4.58049	0.00285955	-0.35372
TBABr-AC (1 : 2)	298.15	388	0.042768	0.338019	0.367932	3.34426	7.67017	3.32579	0.747185	1.45088	1.384	0.002703	-3.9129	Training	-3.56261	0.00404552	-0.401799
TBABr-AC (1 : 2)	298.15	715	0.042768	0.338019	0.367932	3.34426	7.67017	3.32579	0.747185	1.45088	1.384	0.002703	-2.9276	Training	-2.96215	0.00395495	-0.419197
TBABr-AC (1 : 2)	298.15	1302	0.042768	0.338019	0.367932	3.34426	7.67017	3.32579	0.747185	1.45088	1.384	0.002703	-2.4073	Training	-2.38098	0.00419504	-0.211375
TBABr-AC (1 : 2)	298.15	1730	0.042768	0.338019	0.367932	3.34426	7.67017	3.32579	0.747185	1.45088	1.384	0.002703	-2.1509	Training	-2.09086	0.00469615	0.0535311
TBABr-AC (1 : 2)	298.15	2011	0.042768	0.338019	0.367932	3.34426	7.67017	3.32579	0.747185	1.45088	1.384	0.002703	-1.9382	Training	-1.92238	0.00517468	0.332345
TBACl-AC (1 : 2)	298.15	348	0.042768	0.338019	0.329359	3.13341	7.59394	3.48823	0.723827	1.30274	1.19656	0.102918	-3.727	Testing	-3.57878	0.00287836	0.220771
TBACl-AC (1 : 2)	298.15	631	0.042768	0.338019	0.329359	3.13341	7.59394	3.48823	0.723827	1.30274	1.19656	0.102918	-2.9951	Testing	-3.0122	0.00290786	-0.0740568
TBACl-AC (1 : 2)	298.15	943	0.042768	0.338019	0.329359	3.13341	7.59394	3.48823	0.723827	1.30274	1.19656	0.102918	-2.5888	Training	-2.63613	0.00307972	-0.452009
TBACl-AC (1 : 2)	298.15	1319	0.042768	0.338019	0.329359	3.13341	7.59394	3.48823	0.723827	1.30274	1.19656	0.102918	-2.2604	Testing	-2.31367	0.00348099	-0.011806
TBACl-AC (1 : 2)	298.15	1673	0.042768	0.338019	0.329359	3.13341	7.59394	3.48823	0.723827	1.30274	1.19656	0.102918	-1.9853	Testing	-2.07874	0.00405273	0.349106
TBACl-AC (1 : 2)	298.15	2002	0.042768	0.338019	0.329359	3.13341	7.59394	3.48823	0.723827	1.30274	1.19656	0.102918	-1.8387	Training	-1.88852	0.00475275	0.476987
TEACl-AC (1 : 2)	298.15	281	0.042768	0.338019	0.347005	4.00003	4.08752	1.2156	0.72908	1.28209	1.36287	0.093653	-3.6469	Testing	-3.68877	0.00624669	1.5985
TEACl-AC (1 : 2)	298.15	530	0.042768	0.338019	0.347005	4.00003	4.08752	1.2156	0.72908	1.28209	1.36287	0.093653	-3.0352	Training	-3.05455	0.00616303	1.32625
TEACl-AC (1 : 2)	298.15	822	0.042768	0.338019	0.347005	4.00003	4.08752	1.2156	0.72908	1.28209	1.36287	0.093653	-2.6225	Testing	-2.65861	0.00618349	0.188206
TEACl-AC (1 : 2)	298.15	1304	0.042768	0.338019	0.347005	4.00003	4.08752	1.2156	0.72908	1.28209	1.36287	0.093653	-2.2027	Training	-2.24029	0.00649726	0.836808
TEACl-AC (1 : 2)	298.15	1699	0.042768	0.338019	0.347005	4.00003	4.08752	1.2156	0.72908	1.28209	1.36287	0.093653	-1.971	Training	-1.99778	0.0070144	1.06963
TEACl-AC (1 : 2)	298.15	2018	0.042768	0.338019	0.347005	4.00003	4.08752	1.2156	0.72908	1.28209	1.36287	0.093653	-1.8248	Training	-1.82937	0.00760298	1.16091
TBACl-LA (1 : 2)	308	93	0.039963	0.469755	0.719617	3.18855	7.69891	3.90967	0.929087	1.68363	1.25537	0.102918	-5.1832	Training	-5.08563	0.00605829	0.50473
TBACl-LA (1 : 2)	308	194	0.039963	0.469755	0.719617	3.18855	7.69891	3.90967	0.929087	1.68363	1.25537	0.102918	-4.3513	Training	-4.38996	0.00600202	0.665233
TBACl-LA (1 : 2)	308	293	0.039963	0.469755	0.719617	3.18855	7.69891	3.90967	0.929087	1.68363	1.25537	0.102918	-3.91	Training	-3.94014	0.00596172	0.783577
TBACl-LA (1 : 2)	308	392	0.039963	0.469755	0.719617	3.18855	7.69891	3.90967	0.929087	1.68363	1.25537	0.102918	-3.6242	Training	-3.64016	0.00593613	0.74875
TBACl-LA (1 : 2)	308	493	0.039963	0.469755	0.719617	3.18855	7.69891	3.90967	0.929087	1.68363	1.25537	0.102918	-3.4052	Training	-3.41973	0.00592518	0.541625
TBACl-LA (1 : 2)	308	793	0.039963	0.469755	0.719617	3.18855	7.69891	3.90967	0.929087	1.68363	1.25537	0.102918	-2.9275	Testing	-2.96455	0.00598297	-0.508623
TBACl-LA (1 : 2)	308	892	0.039963	0.469755	0.719617	3.18855	7.69891	3.90967	0.929087	1.68363	1.25537	0.102918	-2.8164	Testing	-2.8456	0.00603168	-0.554503
TBACl-LA (1 : 2)	308	993	0.039963	0.469755	0.719617	3.18855	7.69891	3.90967	0.929087	1.68363	1.25537	0.102918	-2.713	Testing	-2.73574	0.00609655	-0.393787
TBACl-LA (1 : 2)	308	1292	0.039963	0.469755	0.719617	3.18855	7.69891	3.90967	0.929087	1.68363	1.25537	0.102918	-2.4626	Testing	-2.46965	0.00637832	-0.0471283
TBACl-LA (1 : 2)	308	1393	0.039963	0.469755	0.719617	3.18855	7.69891	3.90967	0.929087	1.68363	1.25537	0.102918	-2.3963	Training	-2.39581	0.00650383	0.0647893
TBACl-LA (1 : 2)	308	1493	0.039963	0.469755	0.719617	3.18855	7.69891	3.90967	0.929087	1.68363	1.25537	0.102918	-2.3234	Training	-2.32836	0.00664318	0.157405
TBACl-LA (1 : 2)	308	1793	0.039963	0.469755	0.719617	3.18855	7.69891	3.90967	0.929087	1.68363	1.25537	0.102918	-2.1544	Training	-2.14686	0.00715128	0.317742
TBACl-LA (1 : 2)	308	1893	0.039963	0.469755	0.719617	3.18855	7.69891	3.90967	0.929087	1.68363	1.25537	0.102918	-2.1091	Testing	-2.08987	0.00735067	0.302399
TBACl-LA (1 : 2)	308	1992	0.039963	0.469755	0.719617	3.18855	7.69891	3.90967	0.929087	1.68363	1.25537	0.102918	-2.0618	Testing	-2.03397	0.00756286	0.334638
TBACl-LA (1 : 2)	318	93	0.039963	0.469755	0.719617	3.18855	7.69891	3.90967	0.929087	1.68363	1.25537	0.102918	-5.1534	Testing	-5.23292	0.00526622	1.02849
TBACl-LA (1 : 2)	318	194	0.039963	0.469755	0.719617	3.18855	7.69891	3.90967	0.929087	1.68363	1.25537	0.102918	-4.4524	Testing	-4.53771	0.00519784	0.882413
TBACl-LA (1 : 2)	318	293	0.039963	0.469755	0.719617	3.18855	7.69891	3.90967	0.929087	1.68363	1.25537	0.102918	-4.0763	Training	-4.08805	0.00514568	0.83236
TBACl-LA (1 : 2)	318	393	0.039963	0.469755	0.719617	3.18855	7.69891	3.90967	0.929087	1.68363	1.25537	0.102918	-3.7684	Testing	-3.78557	0.00510792	0.790145
TBACl-LA (1 : 2)	318	492	0.039963	0.469755	0.719617	3.18855	7.69891	3.90967	0.929087	1.68363	1.25537	0.102918	-3.537	Training	-3.56973	0.00508533	0.679158
TBACl-LA (1 : 2)	318	793	0.039963	0.469755	0.719617	3.18855	7.69891	3.90967	0.929087	1.68363	1.25537	0.102918	-3.0694	Training	-3.11516	0.00510701	-0.375682
TBACl-LA (1 : 2)	318	893	0.039963	0.469755	0.719617	3.18855	7.69891	3.90967	0.929087	1.68363	1.25537	0.102918	-2.9542	Training	-2.99611	0.00514431	-0.606104
TBACl-LA (1 : 2)	318	992	0.039963	0.469755	0.719617	3.18855	7.69891	3.90967	0.929087	1.68363	1.25537	0.102918	-2.8544	Testing	-2.88912	0.00519602	-0.476203
TBACl-LA (1 : 2)	318	1292	0.039963	0.469755	0.719617	3.18855	7.69891	3.90967	0.929087	1.68363	1.25537	0.102918	-2.603	Training	-2.61986	0.00544256	-0.0939231
TBACl-LA (1 : 2)	318	1393	0.039963	0.469755	0.719617	3.18855	7.69891	3.90967	0.929087	1.68363	1.25537	0.102918	-2.5401	Training	-2.54354	0.00555596	-0.0257488
TBACl-LA (1 : 2)	318	1493	0.039963	0.469755	0.719617	3.18855	7.69891	3.90967	0.929087	1.68363	1.25537	0.102918	-2.4742	Testing	-2.47279	0.00568332	0.0134002
TBACl-LA (1 : 2)	318	1793	0.039963	0.469755	0.719617	3.18855	7.69891	3.90967	0.929087	1.68363	1.25537	0.102918	-2.303	Testing	-2.27736	0.00615547	0.17569
TBACl-LA (1 : 2)	318	1892	0.039963	0.469755	0.719617	3.18855	7.69891	3.90967	0.929087	1.68363	1.25537	0.102918	-2.252	Training	-2.21544	0.00634093	0.257487
TBACl-LA (1 : 2)	318	1992	0.039963	0.469755	0.719617	3.18855	7.69891	3.90967	0.929087	1.68363	1.25537	0.102918	-2.2048	Training	-2.1532	0.0065432	0.289338
TEACl-LA (1 : 2)	308	97	0.039963	0.469755	0.737263	4.05518	4.19249	1.63704	0.93434	1.66297	1.42168	0.093653	-5.7764	Testing	-5.57973	0.00455524	-0.323317
TEACl-LA (1 : 2)	308	197	0.039963	0.469755	0.737263	4.05518	4.19249	1.63704	0.93434	1.66297	1.42168	0.093653	-4.942	Training	-4.89311	0.00446864	-0.108841
TEACl-LA (1 : 2)	308	294	0.039963	0.469755	0.737263	4.05518	4.19249	1.63704	0.93434	1.66297	1.42168	0.093653	-4.4918	Training	-4.45228	0.00439897	0.135802
TEACl-LA (1 : 2)	308	394	0.039963	0.469755	0.737263	4.05518	4.19249	1.63704	0.93434	1.66297	1.42168	0.093653	-4.1865	Training	-4.15049	0.00434193	0.139903
TEACl-LA (1 : 2)	308	493	0.039963	0.469755	0.737263	4.05518	4.19249	1.63704	0.93434	1.66297	1.42168	0.093653	-3.9555	Training	-3.93717	0.00430026	-0.0244935
TEACl-LA (1 : 2)	308	593	0.039963	0.469755	0.737263	4.05518	4.19249	1.63704	0.93434	1.66297	1.42168	0.093653	-3.7823	Testing	-3.76723	0.00427309	-0.36213
TEACl-LA (1 : 2)	308	693	0.039963	0.469755	0.737263	4.05518	4.19249	1.63704	0.93434	1.66297	1.42168	0.093653	-3.6164	Training	-3.6227	0.00426094	-0.658229
TEACl-LA (1 : 2)	308	793	0.039963	0.469755	0.737263	4.05518	4.19249	1.63704	0.93434	1.66297	1.42168	0.093653	-3.4858	Testing	-3.49464	0.0042638	-1.08218
TEACl-LA (1 : 2)	308	893	0.039963	0.469755	0.737263	4.05518	4.19249	1.63704	0.93434	1.66297	1.42168	0.093653	-3.3633	Testing	-3.3795	0.00428167	-1.17222
TEACl-LA (1 : 2)	308	993	0.039963	0.469755	0.737263	4.05518	4.19249	1.63704	0.93434	1.66297	1.42168	0.093653	-3.2702	Testing	-3.27584	0.00431454	-1.0346
TEACl-LA (1 : 2)	308	1093	0.039963	0.469755	0.737263	4.05518	4.19249	1.63704	0.93434	1.66297	1.42168	0.093653	-3.1898	Training	-3.18277	0.00436244	-0.908311
TEACl-LA (1 : 2)	308	1192	0.039963	0.469755	0.737263	4.05518	4.19249	1.63704	0.93434	1.66297	1.42168	0.093653	-3.102	Training	-3.10008	0.00442463	-0.779668
TEACl-LA (1 : 2)	308	1293	0.039963	0.469755	0.737263	4.05518	4.19249	1.63704	0.93434	1.66297	1.42168	0.093653	-3.0283	Training	-3.02418	0.00450325	-0.685958
TEACl-LA (1 : 2)	308	1392	0.039963	0.469755	0.737263	4.05518	4.19249	1.63704	0.93434	1.66297	1.42168	0.093653	-2.9552	Training	-2.95671	0.00459517	-0.592072
TEACl-LA (1 : 2)	308	1493	0.039963	0.469755	0.737263	4.05518	4.19249	1.63704	0.93434	1.66297	1.42168	0.093653	-2.8889	Training	-2.89348	0.0047041	-0.515858
TEACl-LA (1 : 2)	308	1592	0.039963	0.469755	0.737263	4.05518	4.19249	1.63704	0.93434	1.66297	1.42168	0.093653	-2.8263	Training	-2.8356	0.00482574	-0.446798
TEACl-LA (1 : 2)	308	1692	0.039963	0.469755	0.737263	4.05518	4.19249	1.63704	0.93434	1.66297	1.42168	0.093653	-2.7724	Training	-2.78001	0.00496355	-0.399106
TEACl-LA (1 : 2)	308	1793	0.039963	0.469755	0.737263	4.05518	4.19249	1.63704	0.93434	1.66297	1.42168	0.093653	-2.7186	Testing	-2.72569	0.00511797	-0.38146
TEACl-LA (1 : 2)	308	1893	0.039963	0.469755	0.737263	4.05518	4.19249	1.63704	0.93434	1.66297	1.42168	0.093653	-2.6706	Training	-2.67284	0.00528595	-0.318706
TEACl-LA (1 : 2)	308	1993	0.039963	0.469755	0.737263	4.05518	4.19249	1.63704	0.93434	1.66297	1.42168	0.093653	-2.6238	Training	-2.62024	0.00546893	-0.287802
TEACl-LA (1 : 2)	318	94	0.039963	0.469755	0.737263	4.05518	4.19249	1.63704	0.93434	1.66297	1.42168	0.093653	-5.5623	Training	-5.73746	0.00444921	0.777271
TEACl-LA (1 : 2)	318	193	0.039963	0.469755	0.737263	4.05518	4.19249	1.63704	0.93434	1.66297	1.42168	0.093653	-5.036	Training	-5.05054	0.00435109	0.25098
TEACl-LA (1 : 2)	318	294	0.039963	0.469755	0.737263	4.05518	4.19249	1.63704	0.93434	1.66297	1.42168	0.093653	-4.565	Testing	-4.58916	0.00426614	0.360841
TEACl-LA (1 : 2)	318	393	0.039963	0.469755	0.737263	4.05518	4.19249	1.63704	0.93434	1.66297	1.42168	0.093653	-4.3467	Training	-4.2917	0.00419774	0.210287
TEACl-LA (1 : 2)	318	492	0.039963	0.469755	0.737263	4.05518	4.19249	1.63704	0.93434	1.66297	1.42168	0.093653	-4.0965	Training	-4.07988	0.00414404	0.0912867
TEACl-LA (1 : 2)	318	593	0.039963	0.469755	0.737263	4.05518	4.19249	1.63704	0.93434	1.66297	1.42168	0.093653	-3.9327	Testing	-3.91066	0.00410443	-0.277448
TEACl-LA (1 : 2)	318	692	0.039963	0.469755	0.737263	4.05518	4.19249	1.63704	0.93434	1.66297	1.42168	0.093653	-3.7806	Training	-3.77046	0.00408046	-0.597303
TEACl-LA (1 : 2)	318	793	0.039963	0.469755	0.737263	4.05518	4.19249	1.63704	0.93434	1.66297	1.42168	0.093653	-3.6466	Training	-3.64433	0.00407116	-1.0054
TEACl-LA (1 : 2)	318	892	0.039963	0.469755	0.737263	4.05518	4.19249	1.63704	0.93434	1.66297	1.42168	0.093653	-3.5319	Training	-3.53346	0.00407691	-1.30742
TEACl-LA (1 : 2)	318	993	0.039963	0.469755	0.737263	4.05518	4.19249	1.63704	0.93434	1.66297	1.42168	0.093653	-3.4339	Training	-3.43157	0.00409794	-1.15625
TEACl-LA (1 : 2)	318	1092	0.039963	0.469755	0.737263	4.05518	4.19249	1.63704	0.93434	1.66297	1.42168	0.093653	-3.3385	Training	-3.34153	0.00413341	-1.00964
TEACl-LA (1 : 2)	318	1193	0.039963	0.469755	0.737263	4.05518	4.19249	1.63704	0.93434	1.66297	1.42168	0.093653	-3.2634	Testing	-3.2585	0.00418476	-0.930637
TEACl-LA (1 : 2)	318	1293	0.039963	0.469755	0.737263	4.05518	4.19249	1.63704	0.93434	1.66297	1.42168	0.093653	-3.1932	Training	-3.1837	0.00425069	-0.826385
TEACl-LA (1 : 2)	318	1392	0.039963	0.469755	0.737263	4.05518	4.19249	1.63704	0.93434	1.66297	1.42168	0.093653	-3.1283	Training	-3.11552	0.00433074	-0.751887
TEACl-LA (1 : 2)	318	1492	0.039963	0.469755	0.737263	4.05518	4.19249	1.63704	0.93434	1.66297	1.42168	0.093653	-3.0644	Training	-3.05115	0.00442654	-0.680551
TEACl-LA (1 : 2)	318	1593	0.039963	0.469755	0.737263	4.05518	4.19249	1.63704	0.93434	1.66297	1.42168	0.093653	-2.9927	Training	-2.98939	0.00453854	-0.59157
TEACl-LA (1 : 2)	318	1693	0.039963	0.469755	0.737263	4.05518	4.19249	1.63704	0.93434	1.66297	1.42168	0.093653	-2.9475	Testing	-2.93028	0.00466451	-0.5893
TEACl-LA (1 : 2)	318	1793	0.039963	0.469755	0.737263	4.05518	4.19249	1.63704	0.93434	1.66297	1.42168	0.093653	-2.8892	Training	-2.87224	0.00480549	-0.506353
TEACl-LA (1 : 2)	318	1892	0.039963	0.469755	0.737263	4.05518	4.19249	1.63704	0.93434	1.66297	1.42168	0.093653	-2.8399	Training	-2.81512	0.00495984	-0.46874
TEACl-LA (1 : 2)	318	1992	0.039963	0.469755	0.737263	4.05518	4.19249	1.63704	0.93434	1.66297	1.42168	0.093653	-2.7902	Testing	-2.75724	0.0051307	-0.458449
TMACl-LA (1 : 2)	308	98	0.039963	0.469755	0.979394	3.37737	3.27759	1.06878	0.940528	1.70309	1.39931	0.01088	-6.0076	Training	-5.90864	0.00531417	-0.586831
TMACl-LA (1 : 2)	308	194	0.039963	0.469755	0.979394	3.37737	3.27759	1.06878	0.940528	1.70309	1.39931	0.01088	-5.1743	Training	-5.24442	0.0051651	-0.333589
TMACl-LA (1 : 2)	308	295	0.039963	0.469755	0.979394	3.37737	3.27759	1.06878	0.940528	1.70309	1.39931	0.01088	-4.7537	Training	-4.7713	0.0050232	-0.194636
TMACl-LA (1 : 2)	308	393	0.039963	0.469755	0.979394	3.37737	3.27759	1.06878	0.940528	1.70309	1.39931	0.01088	-4.4245	Testing	-4.45514	0.00490016	-0.15325
TMACl-LA (1 : 2)	308	493	0.039963	0.469755	0.979394	3.37737	3.27759	1.06878	0.940528	1.70309	1.39931	0.01088	-4.2037	Testing	-4.21426	0.00478946	-0.345101
TMACl-LA (1 : 2)	308	592	0.039963	0.469755	0.979394	3.37737	3.27759	1.06878	0.940528	1.70309	1.39931	0.01088	-4.0041	Training	-4.02118	0.00469466	-0.554001
TMACl-LA (1 : 2)	308	692	0.039963	0.469755	0.979394	3.37737	3.27759	1.06878	0.940528	1.70309	1.39931	0.01088	-3.8378	Training	-3.8541	0.00461383	-0.878553
TMACl-LA (1 : 2)	308	793	0.039963	0.469755	0.979394	3.37737	3.27759	1.06878	0.940528	1.70309	1.39931	0.01088	-3.6993	Training	-3.70582	0.00454744	-1.27601
TMACl-LA (1 : 2)	308	893	0.039963	0.469755	0.979394	3.37737	3.27759	1.06878	0.940528	1.70309	1.39931	0.01088	-3.5852	Training	-3.57592	0.00449678	-1.45173
TMACl-LA (1 : 2)	308	993	0.039963	0.469755	0.979394	3.37737	3.27759	1.06878	0.940528	1.70309	1.39931	0.01088	-3.4841	Testing	-3.46125	0.00446114	-1.30301
TMACl-LA (1 : 2)	308	1093	0.039963	0.469755	0.979394	3.37737	3.27759	1.06878	0.940528	1.70309	1.39931	0.01088	-3.3835	Testing	-3.36073	0.00444051	-1.148
TMACl-LA (1 : 2)	308	1192	0.039963	0.469755	0.979394	3.37737	3.27759	1.06878	0.940528	1.70309	1.39931	0.01088	-3.3004	Testing	-3.27404	0.00443487	-1.03277
TMACl-LA (1 : 2)	308	1292	0.039963	0.469755	0.979394	3.37737	3.27759	1.06878	0.940528	1.70309	1.39931	0.01088	-3.2309	Testing	-3.1982	0.00444411	-0.949857
TMACl-LA (1 : 2)	308	1392	0.039963	0.469755	0.979394	3.37737	3.27759	1.06878	0.940528	1.70309	1.39931	0.01088	-3.1663	Training	-3.13282	0.00446836	-0.859231
TMACl-LA (1 : 2)	308	1492	0.039963	0.469755	0.979394	3.37737	3.27759	1.06878	0.940528	1.70309	1.39931	0.01088	-3.1062	Testing	-3.07655	0.00450762	-0.81717
TMACl-LA (1 : 2)	308	1593	0.039963	0.469755	0.979394	3.37737	3.27759	1.06878	0.940528	1.70309	1.39931	0.01088	-3.0316	Testing	-3.02764	0.00456251	-0.723213
TMACl-LA (1 : 2)	308	1692	0.039963	0.469755	0.979394	3.37737	3.27759	1.06878	0.940528	1.70309	1.39931	0.01088	-2.9761	Training	-2.98622	0.00463118	-0.648769
TMACl-LA (1 : 2)	308	1793	0.039963	0.469755	0.979394	3.37737	3.27759	1.06878	0.940528	1.70309	1.39931	0.01088	-2.9268	Training	-2.9495	0.00471639	-0.612751
TMACl-LA (1 : 2)	308	1892	0.039963	0.469755	0.979394	3.37737	3.27759	1.06878	0.940528	1.70309	1.39931	0.01088	-2.881	Testing	-2.91793	0.00481477	-0.607893
TMACl-LA (1 : 2)	308	1992	0.039963	0.469755	0.979394	3.37737	3.27759	1.06878	0.940528	1.70309	1.39931	0.01088	-2.8331	Testing	-2.88962	0.00492909	-0.575045
TMACl-LA (1 : 2)	318	95	0.039963	0.469755	0.979394	3.37737	3.27759	1.06878	0.940528	1.70309	1.39931	0.01088	-6.0748	Training	-6.02009	0.00522979	-0.181529
TMACl-LA (1 : 2)	318	194	0.039963	0.469755	0.979394	3.37737	3.27759	1.06878	0.940528	1.70309	1.39931	0.01088	-5.2419	Testing	-5.33506	0.00506397	-0.0191546
TMACl-LA (1 : 2)	318	293	0.039963	0.469755	0.979394	3.37737	3.27759	1.06878	0.940528	1.70309	1.39931	0.01088	-4.8171	Testing	-4.87402	0.00491287	0.0736774
TMACl-LA (1 : 2)	318	393	0.039963	0.469755	0.979394	3.37737	3.27759	1.06878	0.940528	1.70309	1.39931	0.01088	-4.5621	Training	-4.55526	0.00477518	-0.0030285
TMACl-LA (1 : 2)	318	493	0.039963	0.469755	0.979394	3.37737	3.27759	1.06878	0.940528	1.70309	1.39931	0.01088	-4.3245	Training	-4.32024	0.0046525	-0.158998
TMACl-LA (1 : 2)	318	593	0.039963	0.469755	0.979394	3.37737	3.27759	1.06878	0.940528	1.70309	1.39931	0.01088	-4.1477	Testing	-4.13208	0.00454483	-0.48565
TMACl-LA (1 : 2)	318	692	0.039963	0.469755	0.979394	3.37737	3.27759	1.06878	0.940528	1.70309	1.39931	0.01088	-3.9707	Testing	-3.97414	0.00445302	-0.771993
TMACl-LA (1 : 2)	318	792	0.039963	0.469755	0.979394	3.37737	3.27759	1.06878	0.940528	1.70309	1.39931	0.01088	-3.8467	Testing	-3.83506	0.00437522	-1.18823
TMACl-LA (1 : 2)	318	893	0.039963	0.469755	0.979394	3.37737	3.27759	1.06878	0.940528	1.70309	1.39931	0.01088	-3.731	Testing	-3.71174	0.00431188	-1.55257
TMACl-LA (1 : 2)	318	992	0.039963	0.469755	0.979394	3.37737	3.27759	1.06878	0.940528	1.70309	1.39931	0.01088	-3.6291	Training	-3.60568	0.00426466	-1.38502
TMACl-LA (1 : 2)	318	1093	0.039963	0.469755	0.979394	3.37737	3.27759	1.06878	0.940528	1.70309	1.39931	0.01088	-3.5429	Training	-3.51118	0.00423164	-1.26175
TMACl-LA (1 : 2)	318	1193	0.039963	0.469755	0.979394	3.37737	3.27759	1.06878	0.940528	1.70309	1.39931	0.01088	-3.4502	Testing	-3.4299	0.00421403	-1.13623
TMACl-LA (1 : 2)	318	1292	0.039963	0.469755	0.979394	3.37737	3.27759	1.06878	0.940528	1.70309	1.39931	0.01088	-3.3799	Training	-3.3601	0.00421139	-1.03506
TMACl-LA (1 : 2)	318	1393	0.039963	0.469755	0.979394	3.37737	3.27759	1.06878	0.940528	1.70309	1.39931	0.01088	-3.3113	Training	-3.2984	0.00422385	-0.953404
TMACl-LA (1 : 2)	318	1493	0.039963	0.469755	0.979394	3.37737	3.27759	1.06878	0.940528	1.70309	1.39931	0.01088	-3.2486	Testing	-3.24536	0.00425128	-0.903468
TMACl-LA (1 : 2)	318	1593	0.039963	0.469755	0.979394	3.37737	3.27759	1.06878	0.940528	1.70309	1.39931	0.01088	-3.1881	Training	-3.19902	0.00429372	-0.821608
TMACl-LA (1 : 2)	318	1692	0.039963	0.469755	0.979394	3.37737	3.27759	1.06878	0.940528	1.70309	1.39931	0.01088	-3.1311	Training	-3.15857	0.00435052	-0.765789
TMACl-LA (1 : 2)	318	1792	0.039963	0.469755	0.979394	3.37737	3.27759	1.06878	0.940528	1.70309	1.39931	0.01088	-3.0894	Training	-3.12213	0.00442282	-0.746943
TMACl-LA (1 : 2)	318	1892	0.039963	0.469755	0.979394	3.37737	3.27759	1.06878	0.940528	1.70309	1.39931	0.01088	-3.0384	Training	-3.08919	0.00451014	-0.706107
TMACl-LA (1 : 2)	318	1993	0.039963	0.469755	0.979394	3.37737	3.27759	1.06878	0.940528	1.70309	1.39931	0.01088	-2.9892	Testing	-3.05866	0.00461357	-0.6931
TEMACl-AC (1 : 2)	298.15	198	0.042768	0.338019	0.330311	3.69016	4.15324	0.987102	0.760853	1.3458	1.31651	0.01326	-5.0302	Testing	-4.59428	0.00736246	-1.04535
TEMACl-AC (1 : 2)	298.15	413	0.042768	0.338019	0.330311	3.69016	4.15324	0.987102	0.760853	1.3458	1.31651	0.01326	-4.176	Testing	-3.83586	0.00715319	-0.609617
TEMACl-AC (1 : 2)	298.15	806	0.042768	0.338019	0.330311	3.69016	4.15324	0.987102	0.760853	1.3458	1.31651	0.01326	-3.4137	Testing	-3.2335	0.00695001	-1.60801
TEMACl-AC (1 : 2)	298.15	1155	0.042768	0.338019	0.330311	3.69016	4.15324	0.987102	0.760853	1.3458	1.31651	0.01326	-3.0499	Testing	-2.90745	0.00696394	-1.12928
TEMACl-AC (1 : 2)	298.15	1410	0.042768	0.338019	0.330311	3.69016	4.15324	0.987102	0.760853	1.3458	1.31651	0.01326	-2.7848	Testing	-2.71533	0.00708971	-0.714145
TEMACl-AC (1 : 2)	298.15	1624	0.042768	0.338019	0.330311	3.69016	4.15324	0.987102	0.760853	1.3458	1.31651	0.01326	-2.6024	Training	-2.56909	0.00727059	-0.431188
TEMACl-AC (1 : 2)	298.15	1837	0.042768	0.338019	0.330311	3.69016	4.15324	0.987102	0.760853	1.3458	1.31651	0.01326	-2.4394	Training	-2.43175	0.00751889	-0.215655
TEMACl-EG (1 : 2)	298.15	138	0	0.258588	0.637541	3.77064	4.22647	1.12075	0.550082	0.885619	1.85524	0.01326	-5.2796	Training	-5.15626	0.0110654	0.00112718
TEMACl-EG (1 : 2)	298.15	314	0	0.258588	0.637541	3.77064	4.22647	1.12075	0.550082	0.885619	1.85524	0.01326	-4.1247	Training	-4.2281	0.0108178	0.803684
TEMACl-EG (1 : 2)	298.15	543	0	0.258588	0.637541	3.77064	4.22647	1.12075	0.550082	0.885619	1.85524	0.01326	-3.4898	Training	-3.5866	0.0105653	0.661194
TEMACl-EG (1 : 2)	298.15	802	0	0.258588	0.637541	3.77064	4.22647	1.12075	0.550082	0.885619	1.85524	0.01326	-3.2788	Testing	-3.10875	0.0103745	-0.721111
TEMACl-EG (1 : 2)	298.15	1041	0	0.258588	0.637541	3.77064	4.22647	1.12075	0.550082	0.885619	1.85524	0.01326	-3.0937	Testing	-2.76946	0.0102878	-0.588801
TEMACl-EG (1 : 2)	298.15	1345	0	0.258588	0.637541	3.77064	4.22647	1.12075	0.550082	0.885619	1.85524	0.01326	-3.0127	Testing	-2.43282	0.0103014	-0.638724
TEMACl-GLY (1 : 2)	298.15	150	0.002706	0.234267	0.667439	4.53387	4.42595	1.185	0.751019	1.14837	1.91437	0.01326	-6.3532	Testing	-6.13881	0.00843582	-2.83266
TEMACl-GLY (1 : 2)	298.15	420	0.002706	0.234267	0.667439	4.53387	4.42595	1.185	0.751019	1.14837	1.91437	0.01326	-5.1131	Training	-4.9576	0.00817462	-2.40998
TEMACl-GLY (1 : 2)	298.15	833	0.002706	0.234267	0.667439	4.53387	4.42595	1.185	0.751019	1.14837	1.91437	0.01326	-4.3612	Testing	-4.12266	0.00798679	-3.4021
TEMACl-GLY (1 : 2)	298.15	1238	0.002706	0.234267	0.667439	4.53387	4.42595	1.185	0.751019	1.14837	1.91437	0.01326	-3.6354	Testing	-3.59674	0.00805125	-2.03634
TEMACl-GLY (1 : 2)	298.15	1648	0.002706	0.234267	0.667439	4.53387	4.42595	1.185	0.751019	1.14837	1.91437	0.01326	-3.1574	Training	-3.24233	0.00836729	-1.23724
TEMACl-LA (1 : 2)	298.15	143	0.039963	0.469755	0.720569	3.7453	4.25821	1.40854	0.966113	1.72669	1.37532	0.01326	-5.3524	Training	-5.53534	0.00564609	-0.674033
TEMACl-LA (1 : 2)	298.15	418	0.039963	0.469755	0.720569	3.7453	4.25821	1.40854	0.966113	1.72669	1.37532	0.01326	-4.5174	Testing	-4.38829	0.0053615	-1.3143
TEMACl-LA (1 : 2)	298.15	938	0.039963	0.469755	0.720569	3.7453	4.25821	1.40854	0.966113	1.72669	1.37532	0.01326	-3.6446	Testing	-3.54139	0.00513365	-2.16677
TEMACl-LA (1 : 2)	298.15	1265	0.039963	0.469755	0.720569	3.7453	4.25821	1.40854	0.966113	1.72669	1.37532	0.01326	-3.3237	Testing	-3.22118	0.00519824	-1.67859
TEMACl-LA (1 : 2)	298.15	1500	0.039963	0.469755	0.720569	3.7453	4.25821	1.40854	0.966113	1.72669	1.37532	0.01326	-3.1268	Training	-3.04714	0.00534378	-1.3974
TEMACl-LA (1 : 2)	298.15	1863	0.039963	0.469755	0.720569	3.7453	4.25821	1.40854	0.966113	1.72669	1.37532	0.01326	-2.9736	Testing	-2.83179	0.00573152	-1.33459
TEMACl-LEV (1 : 2)	298.15	136	0	0	0.303317	5.96214	4.92339	1.18061	0.910244	1.848	1.53649	0.01326	-5.0033	Training	-5.12634	0.00485281	-0.216133
TEMACl-LEV (1 : 2)	298.15	409	0	0	0.303317	5.96214	4.92339	1.18061	0.910244	1.848	1.53649	0.01326	-3.965	Testing	-3.95047	0.00487828	-0.482889
TEMACl-LEV (1 : 2)	298.15	735	0	0	0.303317	5.96214	4.92339	1.18061	0.910244	1.848	1.53649	0.01326	-3.3391	Testing	-3.38912	0.00505525	-1.326
TEMACl-LEV (1 : 2)	298.15	1043	0	0	0.303317	5.96214	4.92339	1.18061	0.910244	1.848	1.53649	0.01326	-3.0059	Training	-3.04286	0.00536901	-1.10684
TEMACl-LEV (1 : 2)	298.15	1617	0	0	0.303317	5.96214	4.92339	1.18061	0.910244	1.848	1.53649	0.01326	-2.6914	Training	-2.59716	0.00633373	-0.820992
[Gua]Cl-EA (1 : 2)	298.15	226	0.01785	0.7854	0.975008	1.51059	3.21312	1.44097	0.682389	0.876801	1.52235	0.012342	-3.8294	Training	-3.84199	0.0151415	2.5694
[Gua]Cl-EA (1 : 2)	298.15	563	0.01785	0.7854	0.975008	1.51059	3.21312	1.44097	0.682389	0.876801	1.52235	0.012342	-2.8715	Testing	-2.99286	0.0144682	2.33211
[Gua]Cl-EA (1 : 2)	298.15	836	0.01785	0.7854	0.975008	1.51059	3.21312	1.44097	0.682389	0.876801	1.52235	0.012342	-2.5376	Training	-2.67223	0.0140477	1.24545
[Gua]Cl-EA (1 : 2)	298.15	1129	0.01785	0.7854	0.975008	1.51059	3.21312	1.44097	0.682389	0.876801	1.52235	0.012342	-2.4119	Testing	-2.46007	0.013721	1.1788
[Gua]Cl-EA (1 : 2)	298.15	1480	0.01785	0.7854	0.975008	1.51059	3.21312	1.44097	0.682389	0.876801	1.52235	0.012342	-2.3625	Training	-2.31211	0.0134992	1.07592
[Gua]Cl-EA (1 : 2)	298.15	1787	0.01785	0.7854	0.975008	1.51059	3.21312	1.44097	0.682389	0.876801	1.52235	0.012342	-2.3027	Training	-2.22842	0.0134568	0.972484
[Gua]Cl-EA (1 : 2)	298.15	2025	0.01785	0.7854	0.975008	1.51059	3.21312	1.44097	0.682389	0.876801	1.52235	0.012342	-2.2286	Training	-2.17228	0.0135212	0.957882
[Ch]Cl-EA (1 : 2)	308.2	651	0	0	1.09505	3.6505	3.72387	0.913669	0.632443	1.04168	1.79172	0.013634	-2.9957	Training	-3.05652	0.00633591	1.64663
[Ch]Cl-EA (1 : 2)	308.2	1527	0	0	1.09505	3.6505	3.72387	0.913669	0.632443	1.04168	1.79172	0.013634	-2.3539	Training	-2.30639	0.00630906	1.19623
[Ch]Cl-EA (1 : 2)	308.2	2453	0	0	1.09505	3.6505	3.72387	0.913669	0.632443	1.04168	1.79172	0.013634	-1.9878	Testing	-2.05462	0.00753305	1.26146
[Ch]Cl-EA (1 : 2)	308.2	3445	0	0	1.09505	3.6505	3.72387	0.913669	0.632443	1.04168	1.79172	0.013634	-1.7487	Testing	-1.83776	0.0102723	1.0401
[Ch]Cl-EA (1 : 2)	308.2	4376	0	0	1.09505	3.6505	3.72387	0.913669	0.632443	1.04168	1.79172	0.013634	-1.6348	Training	-1.5927	0.0141868	0.624407
[Ch]Cl-EA (1 : 2)	318.2	706	0	0	1.09505	3.6505	3.72387	0.913669	0.632443	1.04168	1.79172	0.013634	-3.1236	Testing	-3.05369	0.00697474	1.3282
[Ch]Cl-EA (1 : 2)	318.2	1661	0	0	1.09505	3.6505	3.72387	0.913669	0.632443	1.04168	1.79172	0.013634	-2.386	Testing	-2.30399	0.00696648	1.20222
[Ch]Cl-EA (1 : 2)	318.2	2618	0	0	1.09505	3.6505	3.72387	0.913669	0.632443	1.04168	1.79172	0.013634	-2.0636	Training	-2.05469	0.00833152	1.26201
[Ch]Cl-EA (1 : 2)	318.2	3527	0	0	1.09505	3.6505	3.72387	0.913669	0.632443	1.04168	1.79172	0.013634	-1.7838	Training	-1.87122	0.0109012	1.19865
[Ch]Cl-EA (1 : 2)	318.2	4504	0	0	1.09505	3.6505	3.72387	0.913669	0.632443	1.04168	1.79172	0.013634	-1.6713	Testing	-1.65949	0.015046	0.63611
[Ch]Cl-EA (1 : 2)	328.2	692	0	0	1.09505	3.6505	3.72387	0.913669	0.632443	1.04168	1.79172	0.013634	-3.1701	Testing	-3.17379	0.00784849	1.75224
[Ch]Cl-EA (1 : 2)	328.2	1691	0	0	1.09505	3.6505	3.72387	0.913669	0.632443	1.04168	1.79172	0.013634	-2.4304	Training	-2.36948	0.00773211	1.38349
[Ch]Cl-EA (1 : 2)	328.2	2544	0	0	1.09505	3.6505	3.72387	0.913669	0.632443	1.04168	1.79172	0.013634	-2.1371	Testing	-2.12444	0.00881841	1.33337
[Ch]Cl-EA (1 : 2)	328.2	3577	0	0	1.09505	3.6505	3.72387	0.913669	0.632443	1.04168	1.79172	0.013634	-1.8579	Testing	-1.92596	0.0115962	1.17291
[Ch]Cl-EA (1 : 2)	328.2	4499	0	0	1.09505	3.6505	3.72387	0.913669	0.632443	1.04168	1.79172	0.013634	-1.743	Training	-1.76124	0.0154283	0.769414
[TBA]Cl-DECA (1 : 2)	298.15	90	0.032505	0.342837	0.330547	2.70157	13.8496	8.0354	0.826424	1.26796	1.1764	0.102918	-4.3901	Testing	-4.43077	0.0037786	0.650288
[TBA]Cl-DECA (1 : 2)	298.15	190	0.032505	0.342837	0.330547	2.70157	13.8496	8.0354	0.826424	1.26796	1.1764	0.102918	-3.6613	Testing	-3.73312	0.00371924	0.586189
[TBA]Cl-DECA (1 : 2)	298.15	290	0.032505	0.342837	0.330547	2.70157	13.8496	8.0354	0.826424	1.26796	1.1764	0.102918	-3.2468	Training	-3.2719	0.00367489	0.596127
[TBA]Cl-DECA (1 : 2)	298.15	390	0.032505	0.342837	0.330547	2.70157	13.8496	8.0354	0.826424	1.26796	1.1764	0.102918	-2.9508	Training	-2.96595	0.00364556	0.57824
[TBA]Cl-DECA (1 : 2)	298.15	490	0.032505	0.342837	0.330547	2.70157	13.8496	8.0354	0.826424	1.26796	1.1764	0.102918	-2.7288	Testing	-2.74691	0.00363123	0.341894
[TBA]Cl-DECA (1 : 2)	298.15	690	0.032505	0.342837	0.330547	2.70157	13.8496	8.0354	0.826424	1.26796	1.1764	0.102918	-2.4024	Testing	-2.42851	0.00364761	-0.308843
[TBA]Cl-DECA (1 : 2)	298.15	790	0.032505	0.342837	0.330547	2.70157	13.8496	8.0354	0.826424	1.26796	1.1764	0.102918	-2.2759	Testing	-2.30021	0.00367832	-0.62172
[TBA]Cl-DECA (1 : 2)	298.15	990	0.032505	0.342837	0.330547	2.70157	13.8496	8.0354	0.826424	1.26796	1.1764	0.102918	-2.0675	Testing	-2.08357	0.00378477	-0.295015
[TBA]Cl-DECA (1 : 2)	298.15	1190	0.032505	0.342837	0.330547	2.70157	13.8496	8.0354	0.826424	1.26796	1.1764	0.102918	-1.8951	Training	-1.91115	0.00395126	-0.0161475
[TBA]Cl-DECA (1 : 2)	298.15	1490	0.032505	0.342837	0.330547	2.70157	13.8496	8.0354	0.826424	1.26796	1.1764	0.102918	-1.6858	Training	-1.71453	0.00431358	0.239475
[TBA]Cl-DECA (1 : 2)	298.15	1790	0.032505	0.342837	0.330547	2.70157	13.8496	8.0354	0.826424	1.26796	1.1764	0.102918	-1.5237	Testing	-1.56354	0.00481099	0.340042
[TBA]Cl-DECA (1 : 2)	298.15	1990	0.032505	0.342837	0.330547	2.70157	13.8496	8.0354	0.826424	1.26796	1.1764	0.102918	-1.4296	Testing	-1.47667	0.00521765	0.401798
[TBA]Cl-DECA (1 : 2)	308.15	90	0.032505	0.342837	0.330547	2.70157	13.8496	8.0354	0.826424	1.26796	1.1764	0.102918	-4.5952	Testing	-4.52789	0.00358863	0.675378
[TBA]Cl-DECA (1 : 2)	308.15	190	0.032505	0.342837	0.330547	2.70157	13.8496	8.0354	0.826424	1.26796	1.1764	0.102918	-3.8304	Testing	-3.83296	0.00351729	0.694727
[TBA]Cl-DECA (1 : 2)	308.15	290	0.032505	0.342837	0.330547	2.70157	13.8496	8.0354	0.826424	1.26796	1.1764	0.102918	-3.3962	Testing	-3.37405	0.00346096	0.6355
[TBA]Cl-DECA (1 : 2)	308.15	390	0.032505	0.342837	0.330547	2.70157	13.8496	8.0354	0.826424	1.26796	1.1764	0.102918	-3.1078	Testing	-3.0701	0.00341964	0.600347
[TBA]Cl-DECA (1 : 2)	308.15	490	0.032505	0.342837	0.330547	2.70157	13.8496	8.0354	0.826424	1.26796	1.1764	0.102918	-2.886	Testing	-2.85306	0.00339333	0.410814
[TBA]Cl-DECA (1 : 2)	308.15	690	0.032505	0.342837	0.330547	2.70157	13.8496	8.0354	0.826424	1.26796	1.1764	0.102918	-2.5536	Testing	-2.53921	0.00338574	-0.226016
[TBA]Cl-DECA (1 : 2)	308.15	790	0.032505	0.342837	0.330547	2.70157	13.8496	8.0354	0.826424	1.26796	1.1764	0.102918	-2.4236	Training	-2.41332	0.00340446	-0.604273
[TBA]Cl-DECA (1 : 2)	308.15	990	0.032505	0.342837	0.330547	2.70157	13.8496	8.0354	0.826424	1.26796	1.1764	0.102918	-2.21	Testing	-2.2008	0.00348694	-0.380763
[TBA]Cl-DECA (1 : 2)	308.15	1190	0.032505	0.342837	0.330547	2.70157	13.8496	8.0354	0.826424	1.26796	1.1764	0.102918	-2.041	Testing	-2.03034	0.00362946	-0.145388
[TBA]Cl-DECA (1 : 2)	308.15	1490	0.032505	0.342837	0.330547	2.70157	13.8496	8.0354	0.826424	1.26796	1.1764	0.102918	-1.8313	Training	-1.8315	0.00395582	0.144917
[TBA]Cl-DECA (1 : 2)	308.15	1790	0.032505	0.342837	0.330547	2.70157	13.8496	8.0354	0.826424	1.26796	1.1764	0.102918	-1.6644	Training	-1.67314	0.00441728	0.300288
[TBA]Cl-DECA (1 : 2)	308.15	1990	0.032505	0.342837	0.330547	2.70157	13.8496	8.0354	0.826424	1.26796	1.1764	0.102918	-1.5712	Training	-1.57948	0.00479998	0.361152
[TBA]Cl-DECA (1 : 2)	323.15	90	0.032505	0.342837	0.330547	2.70157	13.8496	8.0354	0.826424	1.26796	1.1764	0.102918	-4.756	Testing	-4.72682	0.00365499	1.05341
[TBA]Cl-DECA (1 : 2)	323.15	190	0.032505	0.342837	0.330547	2.70157	13.8496	8.0354	0.826424	1.26796	1.1764	0.102918	-4.0286	Testing	-4.03322	0.00356567	0.986069
[TBA]Cl-DECA (1 : 2)	323.15	290	0.032505	0.342837	0.330547	2.70157	13.8496	8.0354	0.826424	1.26796	1.1764	0.102918	-3.6082	Training	-3.5751	0.00349136	0.846591
[TBA]Cl-DECA (1 : 2)	323.15	390	0.032505	0.342837	0.330547	2.70157	13.8496	8.0354	0.826424	1.26796	1.1764	0.102918	-3.3104	Testing	-3.27164	0.00343206	0.780684
[TBA]Cl-DECA (1 : 2)	323.15	490	0.032505	0.342837	0.330547	2.70157	13.8496	8.0354	0.826424	1.26796	1.1764	0.102918	-3.0835	Training	-3.05524	0.00338778	0.651691
[TBA]Cl-DECA (1 : 2)	323.15	690	0.032505	0.342837	0.330547	2.70157	13.8496	8.0354	0.826424	1.26796	1.1764	0.102918	-2.7504	Testing	-2.74403	0.00334423	-0.0322339
[TBA]Cl-DECA (1 : 2)	323.15	790	0.032505	0.342837	0.330547	2.70157	13.8496	8.0354	0.826424	1.26796	1.1764	0.102918	-2.6255	Training	-2.61992	0.00334498	-0.41867
[TBA]Cl-DECA (1 : 2)	323.15	990	0.032505	0.342837	0.330547	2.70157	13.8496	8.0354	0.826424	1.26796	1.1764	0.102918	-2.4068	Testing	-2.41049	0.0033915	-0.470095
[TBA]Cl-DECA (1 : 2)	323.15	1190	0.032505	0.342837	0.330547	2.70157	13.8496	8.0354	0.826424	1.26796	1.1764	0.102918	-2.2293	Testing	-2.24092	0.00349807	-0.215017
[TBA]Cl-DECA (1 : 2)	323.15	1490	0.032505	0.342837	0.330547	2.70157	13.8496	8.0354	0.826424	1.26796	1.1764	0.102918	-2.0219	Training	-2.03793	0.0037705	0.0684568
[TBA]Cl-DECA (1 : 2)	323.15	1790	0.032505	0.342837	0.330547	2.70157	13.8496	8.0354	0.826424	1.26796	1.1764	0.102918	-1.8579	Testing	-1.87007	0.00417802	0.176785
[TBA]Cl-DECA (1 : 2)	323.15	1990	0.032505	0.342837	0.330547	2.70157	13.8496	8.0354	0.826424	1.26796	1.1764	0.102918	-1.7626	Testing	-1.76809	0.00452476	0.241322
[TOMA]Cl-DECA (1 : 2)	298.15	90	0.032505	0.342837	0.319089	2.62978	17.9589	10.5389	0.973083	1.37232	1.20185	0.022338	-4.32	Testing	-4.33203	0.00817196	0.0574042
[TOMA]Cl-DECA (1 : 2)	298.15	190	0.032505	0.342837	0.319089	2.62978	17.9589	10.5389	0.973083	1.37232	1.20185	0.022338	-3.5405	Testing	-3.65672	0.00802116	0.110828
[TOMA]Cl-DECA (1 : 2)	298.15	290	0.032505	0.342837	0.319089	2.62978	17.9589	10.5389	0.973083	1.37232	1.20185	0.022338	-3.1893	Training	-3.2071	0.00788537	-0.115579
[TOMA]Cl-DECA (1 : 2)	298.15	390	0.032505	0.342837	0.319089	2.62978	17.9589	10.5389	0.973083	1.37232	1.20185	0.022338	-2.8806	Training	-2.90165	0.00776459	-0.103438
[TOMA]Cl-DECA (1 : 2)	298.15	490	0.032505	0.342837	0.319089	2.62978	17.9589	10.5389	0.973083	1.37232	1.20185	0.022338	-2.6722	Training	-2.67684	0.00765882	-0.328448
[TOMA]Cl-DECA (1 : 2)	298.15	790	0.032505	0.342837	0.319089	2.62978	17.9589	10.5389	0.973083	1.37232	1.20185	0.022338	-2.2118	Testing	-2.20761	0.00743158	-1.14745
[TOMA]Cl-DECA (1 : 2)	298.15	990	0.032505	0.342837	0.319089	2.62978	17.9589	10.5389	0.973083	1.37232	1.20185	0.022338	-2.004	Training	-1.98136	0.00735515	-0.801942
[TOMA]Cl-DECA (1 : 2)	298.15	1490	0.032505	0.342837	0.319089	2.62978	17.9589	10.5389	0.973083	1.37232	1.20185	0.022338	-1.6342	Testing	-1.60475	0.00742674	-0.355856
[TOMA]Cl-DECA (1 : 2)	298.15	1990	0.032505	0.342837	0.319089	2.62978	17.9589	10.5389	0.973083	1.37232	1.20185	0.022338	-1.3771	Training	-1.37849	0.00787361	-0.11719
[TOMA]Cl-DECA (1 : 2)	308.15	90	0.032505	0.342837	0.319089	2.62978	17.9589	10.5389	0.973083	1.37232	1.20185	0.022338	-4.4918	Testing	-4.41998	0.00863485	0.159684
[TOMA]Cl-DECA (1 : 2)	308.15	190	0.032505	0.342837	0.319089	2.62978	17.9589	10.5389	0.973083	1.37232	1.20185	0.022338	-3.7339	Training	-3.74985	0.00847206	0.20295
[TOMA]Cl-DECA (1 : 2)	308.15	290	0.032505	0.342837	0.319089	2.62978	17.9589	10.5389	0.973083	1.37232	1.20185	0.022338	-3.3215	Testing	-3.30579	0.00832429	-0.0223692
[TOMA]Cl-DECA (1 : 2)	308.15	390	0.032505	0.342837	0.319089	2.62978	17.9589	10.5389	0.973083	1.37232	1.20185	0.022338	-3.0449	Testing	-3.00641	0.00819152	-0.0848751
[TOMA]Cl-DECA (1 : 2)	308.15	490	0.032505	0.342837	0.319089	2.62978	17.9589	10.5389	0.973083	1.37232	1.20185	0.022338	-2.8201	Testing	-2.78834	0.00807377	-0.267454
[TOMA]Cl-DECA (1 : 2)	308.15	790	0.032505	0.342837	0.319089	2.62978	17.9589	10.5389	0.973083	1.37232	1.20185	0.022338	-2.3434	Training	-2.34254	0.00781058	-1.19546
[TOMA]Cl-DECA (1 : 2)	308.15	990	0.032505	0.342837	0.319089	2.62978	17.9589	10.5389	0.973083	1.37232	1.20185	0.022338	-2.1371	Testing	-2.13164	0.00771017	-0.886092
[TOMA]Cl-DECA (1 : 2)	308.15	1490	0.032505	0.342837	0.319089	2.62978	17.9589	10.5389	0.973083	1.37232	1.20185	0.022338	-1.7597	Training	-1.77815	0.00772185	-0.3736
[TOMA]Cl-DECA (1 : 2)	308.15	1990	0.032505	0.342837	0.319089	2.62978	17.9589	10.5389	0.973083	1.37232	1.20185	0.022338	-1.5046	Training	-1.54991	0.00810879	-0.169188
[TOMA]Br-DECA (1 : 2)	298.15	90	0.032505	0.342837	0.375716	2.70267	17.8588	10.4367	0.94675	1.49969	1.28882	0	-4.2687	Testing	-4.29975	0.00640174	0.246507
[TOMA]Br-DECA (1 : 2)	298.15	190	0.032505	0.342837	0.375716	2.70267	17.8588	10.4367	0.94675	1.49969	1.28882	0	-3.5899	Training	-3.63548	0.00626663	0.104486
[TOMA]Br-DECA (1 : 2)	298.15	290	0.032505	0.342837	0.375716	2.70267	17.8588	10.4367	0.94675	1.49969	1.28882	0	-3.1869	Training	-3.19217	0.00614654	-0.0365966
[TOMA]Br-DECA (1 : 2)	298.15	390	0.032505	0.342837	0.375716	2.70267	17.8588	10.4367	0.94675	1.49969	1.28882	0	-2.8986	Training	-2.88857	0.00604146	-0.07269
[TOMA]Br-DECA (1 : 2)	298.15	490	0.032505	0.342837	0.375716	2.70267	17.8588	10.4367	0.94675	1.49969	1.28882	0	-2.6593	Training	-2.66317	0.00595138	-0.22464
[TOMA]Br-DECA (1 : 2)	298.15	790	0.032505	0.342837	0.375716	2.70267	17.8588	10.4367	0.94675	1.49969	1.28882	0	-2.2055	Testing	-2.18892	0.00577123	-1.04799
[TOMA]Br-DECA (1 : 2)	298.15	990	0.032505	0.342837	0.375716	2.70267	17.8588	10.4367	0.94675	1.49969	1.28882	0	-1.9936	Testing	-1.95855	0.00572618	-0.713172
[TOMA]Br-DECA (1 : 2)	298.15	1490	0.032505	0.342837	0.375716	2.70267	17.8588	10.4367	0.94675	1.49969	1.28882	0	-1.62	Testing	-1.56495	0.00587625	-0.238086
[TOMA]Br-DECA (1 : 2)	298.15	1990	0.032505	0.342837	0.375716	2.70267	17.8588	10.4367	0.94675	1.49969	1.28882	0	-1.3595	Training	-1.31855	0.00640159	0.0109762
[TOMA]Br-DECA (1 : 2)	298.15	90	0.032505	0.342837	0.375716	2.70267	17.8588	10.4367	0.94675	1.49969	1.28882	0	-4.4145	Training	-4.29975	0.00640174	-0.0566423
[TOMA]Br-DECA (1 : 2)	308.15	190	0.032505	0.342837	0.375716	2.70267	17.8588	10.4367	0.94675	1.49969	1.28882	0	-3.7214	Testing	-3.72379	0.00613281	0.262203
[TOMA]Br-DECA (1 : 2)	308.15	290	0.032505	0.342837	0.375716	2.70267	17.8588	10.4367	0.94675	1.49969	1.28882	0	-3.3132	Testing	-3.28539	0.00600073	0.0687392
[TOMA]Br-DECA (1 : 2)	308.15	390	0.032505	0.342837	0.375716	2.70267	17.8588	10.4367	0.94675	1.49969	1.28882	0	-3.0078	Testing	-2.98736	0.00588366	0.0729922
[TOMA]Br-DECA (1 : 2)	308.15	490	0.032505	0.342837	0.375716	2.70267	17.8588	10.4367	0.94675	1.49969	1.28882	0	-2.7839	Training	-2.76834	0.0057816	-0.0772607
[TOMA]Br-DECA (1 : 2)	308.15	790	0.032505	0.342837	0.375716	2.70267	17.8588	10.4367	0.94675	1.49969	1.28882	0	-2.3259	Testing	-2.31699	0.00556549	-1.08251
[TOMA]Br-DECA (1 : 2)	308.15	990	0.032505	0.342837	0.375716	2.70267	17.8588	10.4367	0.94675	1.49969	1.28882	0	-2.1186	Training	-2.10206	0.00549648	-0.736887
[TOMA]Br-DECA (1 : 2)	308.15	1490	0.032505	0.342837	0.375716	2.70267	17.8588	10.4367	0.94675	1.49969	1.28882	0	-1.7458	Testing	-1.73376	0.00558662	-0.285123
[TOMA]Br-DECA (1 : 2)	308.15	1990	0.032505	0.342837	0.375716	2.70267	17.8588	10.4367	0.94675	1.49969	1.28882	0	-1.4859	Testing	-1.48762	0.00605204	-0.0735957
[TOMA]Br-DECA (1 : 2)	323.15	90	0.032505	0.342837	0.375716	2.70267	17.8588	10.4367	0.94675	1.49969	1.28882	0	-4.5375	Training	-4.54036	0.00644843	0.928869
[TOMA]Br-DECA (1 : 2)	323.15	190	0.032505	0.342837	0.375716	2.70267	17.8588	10.4367	0.94675	1.49969	1.28882	0	-3.8728	Testing	-3.88557	0.00628337	0.662027
[TOMA]Br-DECA (1 : 2)	323.15	290	0.032505	0.342837	0.375716	2.70267	17.8588	10.4367	0.94675	1.49969	1.28882	0	-3.49	Testing	-3.45302	0.00613331	0.308881
[TOMA]Br-DECA (1 : 2)	323.15	390	0.032505	0.342837	0.375716	2.70267	17.8588	10.4367	0.94675	1.49969	1.28882	0	-3.1583	Training	-3.16163	0.00599826	0.418234
[TOMA]Br-DECA (1 : 2)	323.15	490	0.032505	0.342837	0.375716	2.70267	17.8588	10.4367	0.94675	1.49969	1.28882	0	-2.9375	Testing	-2.95016	0.00587823	0.182247
[TOMA]Br-DECA (1 : 2)	323.15	790	0.032505	0.342837	0.375716	2.70267	17.8588	10.4367	0.94675	1.49969	1.28882	0	-2.5035	Training	-2.52445	0.00560819	-0.904564
[TOMA]Br-DECA (1 : 2)	323.15	990	0.032505	0.342837	0.375716	2.70267	17.8588	10.4367	0.94675	1.49969	1.28882	0	-2.2877	Training	-2.32479	0.00550322	-0.762513
[TOMA]Br-DECA (1 : 2)	323.15	1490	0.032505	0.342837	0.375716	2.70267	17.8588	10.4367	0.94675	1.49969	1.28882	0	-1.9112	Testing	-1.97206	0.00550348	-0.301669
[TOMA]Br-DECA (1 : 2)	323.15	1990	0.032505	0.342837	0.375716	2.70267	17.8588	10.4367	0.94675	1.49969	1.28882	0	-1.6597	Testing	-1.7088	0.00587901	-0.109613
[Ch]Cl-EG (1 : 2)	303.15	643.6	0	0.258588	1.09617	3.85012	2.89392	0.776026	0.72151	1.1821	1.88577	0.001292	-3.6382	Training	-3.66949	0.00321376	0.200736
[Ch]Cl-EG (1 : 2)	303.15	734.2	0	0.258588	1.09617	3.85012	2.89392	0.776026	0.72151	1.1821	1.88577	0.001292	-3.4999	Training	-3.52754	0.00313744	-0.122551
[Ch]Cl-EG (1 : 2)	303.15	823.9	0	0.258588	1.09617	3.85012	2.89392	0.776026	0.72151	1.1821	1.88577	0.001292	-3.3785	Testing	-3.40001	0.00307401	-0.505859
[Ch]Cl-EG (1 : 2)	303.15	1046.2	0	0.258588	1.09617	3.85012	2.89392	0.776026	0.72151	1.1821	1.88577	0.001292	-3.135	Training	-3.13203	0.00296887	-0.153
[Ch]Cl-EG (1 : 2)	303.15	1246.2	0	0.258588	1.09617	3.85012	2.89392	0.776026	0.72151	1.1821	1.88577	0.001292	-2.9584	Training	-2.94327	0.00293767	0.105056
[TBA]Br-EG (1 : 2)	303.15	412	0	0.258588	0.675162	3.42475	7.74339	3.45944	0.536414	0.990696	1.92273	0.002703	-4.1931	Training	-4.22428	0.00597272	-0.458592
[TBA]Br-EG (1 : 2)	303.15	774.8	0	0.258588	0.675162	3.42475	7.74339	3.45944	0.536414	0.990696	1.92273	0.002703	-3.5032	Testing	-3.50528	0.00575934	-1.43923
[TBA]Br-EG (1 : 2)	303.15	887.6	0	0.258588	0.675162	3.42475	7.74339	3.45944	0.536414	0.990696	1.92273	0.002703	-3.4907	Training	-3.34052	0.00573326	-1.75382
[TBA]Br-EG (1 : 2)	303.15	1060.9	0	0.258588	0.675162	3.42475	7.74339	3.45944	0.536414	0.990696	1.92273	0.002703	-3.1489	Testing	-3.12046	0.00573041	-1.09853
[TBA]Br-EG (1 : 2)	303.15	1291.1	0	0.258588	0.675162	3.42475	7.74339	3.45944	0.536414	0.990696	1.92273	0.002703	-2.9243	Testing	-2.87829	0.00579634	-0.757887
[TBA]Br-DEG (1 : 2)	303.15	720.8	0	0.095766	0.722055	3.93931	9.88625	3.80304	0.626603	1.30951	2.0341	0.002703	-3.3962	Testing	-3.41254	0.00848255	-1.26281
[TBA]Br-DEG (1 : 2)	303.15	962.5	0	0.095766	0.722055	3.93931	9.88625	3.80304	0.626603	1.30951	2.0341	0.002703	-2.9077	Testing	-3.06274	0.00862696	-0.786039
[TBA]Br-DEG (1 : 2)	303.15	1005	0	0.095766	0.722055	3.93931	9.88625	3.80304	0.626603	1.30951	2.0341	0.002703	-2.8251	Training	-3.00874	0.00866142	-0.603718
[TBA]Br-DEG (1 : 2)	303.15	1096.3	0	0.095766	0.722055	3.93931	9.88625	3.80304	0.626603	1.30951	2.0341	0.002703	-2.6437	Testing	-2.89933	0.00874461	-0.278694
[TBA]Br-DEG (1 : 2)	303.15	1392.5	0	0.095766	0.722055	3.93931	9.88625	3.80304	0.626603	1.30951	2.0341	0.002703	-2.3096	Testing	-2.59811	0.00910064	0.264171
[TBA]Br-methyldiethanol amine (1 : 2)	303.15	610.5	0	0.003663	0.482937	3.90423	11.0451	4.07545	0.56849	1.03366	2.09631	0.004749	-3.0705	Testing	-2.72773	0.0130858	0.0373195
[TBA]Br-methyldiethanol amine (1 : 2)	303.15	734.6	0	0.003663	0.482937	3.90423	11.0451	4.07545	0.56849	1.03366	2.09631	0.004749	-2.7121	Training	-2.56207	0.0131657	0.0313875
[TBA]Br-methyldiethanol amine (1 : 2)	303.15	823	0	0.003663	0.482937	3.90423	11.0451	4.07545	0.56849	1.03366	2.09631	0.004749	-2.5797	Training	-2.45943	0.0132367	-0.0996883
[TBA]Br-methyldiethanol amine (1 : 2)	303.15	930.6	0	0.003663	0.482937	3.90423	11.0451	4.07545	0.56849	1.03366	2.09631	0.004749	-2.3147	Training	-2.34825	0.013339	0.441071
[TBA]Br-methyldiethanol amine (1 : 2)	303.15	1011.2	0	0.003663	0.482937	3.90423	11.0451	4.07545	0.56849	1.03366	2.09631	0.004749	-2.2838	Training	-2.27352	0.013427	0.449853
[TBA]Br-Decanoic acid (1 : 2)	303.15	488	0.032505	0.342837	0.36912	2.91242	13.9258	7.87296	0.849782	1.4161	1.36384	0.002703	-2.8577	Testing	-2.84911	0.00440942	0.335604
[TBA]Br-Decanoic acid (1 : 2)	303.15	564	0.032505	0.342837	0.36912	2.91242	13.9258	7.87296	0.849782	1.4161	1.36384	0.002703	-2.6564	Testing	-2.70663	0.00436774	0.267433
[TBA]Br-Decanoic acid (1 : 2)	303.15	654	0.032505	0.342837	0.36912	2.91242	13.9258	7.87296	0.849782	1.4161	1.36384	0.002703	-2.4889	Testing	-2.56149	0.0043296	0.0223981
[TBA]Br-Decanoic acid (1 : 2)	303.15	771	0.032505	0.342837	0.36912	2.91242	13.9258	7.87296	0.849782	1.4161	1.36384	0.002703	-2.3849	Training	-2.39988	0.00429819	-0.534379
[TBA]Br-Decanoic acid (1 : 2)	303.15	914	0.032505	0.342837	0.36912	2.91242	13.9258	7.87296	0.849782	1.4161	1.36384	0.002703	-2.2118	Testing	-2.23336	0.00428771	-0.351925
[TBA]Br-Decanoic acid (1 : 2)	303.15	1004	0.032505	0.342837	0.36912	2.91242	13.9258	7.87296	0.849782	1.4161	1.36384	0.002703	-2.1062	Training	-2.14269	0.00429686	-0.144414
[TBA]Br-Decanoic acid (1 : 2)	303.15	1117	0.032505	0.342837	0.36912	2.91242	13.9258	7.87296	0.849782	1.4161	1.36384	0.002703	-2.0318	Testing	-2.04177	0.00432555	-0.0933971
[TBA]Br-Decanoic acid (1 : 2)	313.15	470	0.032505	0.342837	0.36912	2.91242	13.9258	7.87296	0.849782	1.4161	1.36384	0.002703	-3.0619	Training	-3.00394	0.00413784	0.467337
[TBA]Br-Decanoic acid (1 : 2)	313.15	607	0.032505	0.342837	0.36912	2.91242	13.9258	7.87296	0.849782	1.4161	1.36384	0.002703	-2.8002	Testing	-2.76341	0.00404886	0.0648358
[TBA]Br-Decanoic acid (1 : 2)	313.15	653	0.032505	0.342837	0.36912	2.91242	13.9258	7.87296	0.849782	1.4161	1.36384	0.002703	-2.7426	Testing	-2.69556	0.0040253	-0.125334
[TBA]Br-Decanoic acid (1 : 2)	313.15	736	0.032505	0.342837	0.36912	2.91242	13.9258	7.87296	0.849782	1.4161	1.36384	0.002703	-2.577	Training	-2.58469	0.00399083	-0.295384
[TBA]Br-Decanoic acid (1 : 2)	313.15	841	0.032505	0.342837	0.36912	2.91242	13.9258	7.87296	0.849782	1.4161	1.36384	0.002703	-2.4546	Training	-2.46154	0.00396204	-0.588719
[TBA]Br-Decanoic acid (1 : 2)	313.15	1030	0.032505	0.342837	0.36912	2.91242	13.9258	7.87296	0.849782	1.4161	1.36384	0.002703	-2.2692	Testing	-2.27663	0.00395192	-0.331104
[TBA]Br-Decanoic acid (1 : 2)	313.15	1138	0.032505	0.342837	0.36912	2.91242	13.9258	7.87296	0.849782	1.4161	1.36384	0.002703	-2.1839	Testing	-2.18751	0.00397022	-0.217817
[TBA]Br-Hexanoic acid (1 : 2)	303.15	474	0.035112	0.340164	0.367668	2.91922	11.0371	5.56748	0.790316	1.41389	1.36697	0.002703	-2.9604	Training	-2.95571	0.00509578	0.822429
[TBA]Br-Hexanoic acid (1 : 2)	303.15	543	0.035112	0.340164	0.367668	2.91922	11.0371	5.56748	0.790316	1.41389	1.36697	0.002703	-2.7774	Training	-2.82387	0.00507322	0.759866
[TBA]Br-Hexanoic acid (1 : 2)	303.15	629	0.035112	0.340164	0.367668	2.91922	11.0371	5.56748	0.790316	1.41389	1.36697	0.002703	-2.678	Training	-2.68278	0.00505509	0.37762
[TBA]Br-Hexanoic acid (1 : 2)	303.15	722	0.035112	0.340164	0.367668	2.91922	11.0371	5.56748	0.790316	1.41389	1.36697	0.002703	-2.537	Testing	-2.55096	0.00504799	0.00670932
[TBA]Br-Hexanoic acid (1 : 2)	303.15	825	0.035112	0.340164	0.367668	2.91922	11.0371	5.56748	0.790316	1.41389	1.36697	0.002703	-2.4338	Training	-2.42366	0.00505528	-0.302716
[TBA]Br-Hexanoic acid (1 : 2)	303.15	1058	0.035112	0.340164	0.367668	2.91922	11.0371	5.56748	0.790316	1.41389	1.36697	0.002703	-2.1777	Training	-2.18805	0.00513052	0.116994
[TBA]Br-Hexanoic acid (1 : 2)	303.15	1103	0.035112	0.340164	0.367668	2.91922	11.0371	5.56748	0.790316	1.41389	1.36697	0.002703	-2.1111	Testing	-2.14904	0.00515444	0.197966
[TBA]Br-Hexanoic acid (1 : 2)	313.15	444	0.035112	0.340164	0.367668	2.91922	11.0371	5.56748	0.790316	1.41389	1.36697	0.002703	-3.1845	Testing	-3.16395	0.00468776	0.895306
[TBA]Br-Hexanoic acid (1 : 2)	313.15	534	0.035112	0.340164	0.367668	2.91922	11.0371	5.56748	0.790316	1.41389	1.36697	0.002703	-3.02	Testing	-2.98863	0.00464491	0.643317
[TBA]Br-Hexanoic acid (1 : 2)	313.15	657	0.035112	0.340164	0.367668	2.91922	11.0371	5.56748	0.790316	1.41389	1.36697	0.002703	-2.8117	Training	-2.79551	0.004606	0.302512
[TBA]Br-Hexanoic acid (1 : 2)	313.15	809	0.035112	0.340164	0.367668	2.91922	11.0371	5.56748	0.790316	1.41389	1.36697	0.002703	-2.6283	Training	-2.60227	0.0045893	-0.354841
[TBA]Br-Hexanoic acid (1 : 2)	313.15	942	0.035112	0.340164	0.367668	2.91922	11.0371	5.56748	0.790316	1.41389	1.36697	0.002703	-2.471	Training	-2.46046	0.00460313	-0.234515
[TBA]Br-Hexanoic acid (1 : 2)	313.15	1056	0.035112	0.340164	0.367668	2.91922	11.0371	5.56748	0.790316	1.41389	1.36697	0.002703	-2.4079	Training	-2.35367	0.00463612	-0.176235
[TBA]Br-Hexanoic acid (1 : 2)	313.15	1110	0.035112	0.340164	0.367668	2.91922	11.0371	5.56748	0.790316	1.41389	1.36697	0.002703	-2.3392	Testing	-2.30691	0.00465855	-0.0916772
[TBA]Br-Hexanoic acid (1 : 2)	323.15	480	0.035112	0.340164	0.367668	2.91922	11.0371	5.56748	0.790316	1.41389	1.36697	0.002703	-3.3077	Testing	-3.27189	0.00443215	0.789717
[TBA]Br-Hexanoic acid (1 : 2)	323.15	558	0.035112	0.340164	0.367668	2.91922	11.0371	5.56748	0.790316	1.41389	1.36697	0.002703	-3.1327	Testing	-3.1331	0.00438917	0.646508
[TBA]Br-Hexanoic acid (1 : 2)	323.15	653	0.035112	0.340164	0.367668	2.91922	11.0371	5.56748	0.790316	1.41389	1.36697	0.002703	-2.9858	Testing	-2.98999	0.00434916	0.318539
[TBA]Br-Hexanoic acid (1 : 2)	323.15	745	0.035112	0.340164	0.367668	2.91922	11.0371	5.56748	0.790316	1.41389	1.36697	0.002703	-2.87	Training	-2.87001	0.00432333	-0.024972
[TBA]Br-Hexanoic acid (1 : 2)	323.15	834	0.035112	0.340164	0.367668	2.91922	11.0371	5.56748	0.790316	1.41389	1.36697	0.002703	-2.7969	Testing	-2.76657	0.00431043	-0.517229
[TBA]Br-Hexanoic acid (1 : 2)	323.15	959	0.035112	0.340164	0.367668	2.91922	11.0371	5.56748	0.790316	1.41389	1.36697	0.002703	-2.7016	Testing	-2.63701	0.00431239	-0.569098
[TBA]Br-Hexanoic acid (1 : 2)	323.15	1105	0.035112	0.340164	0.367668	2.91922	11.0371	5.56748	0.790316	1.41389	1.36697	0.002703	-2.5434	Training	-2.503	0.00434437	-0.286226
[BHDE]Cl-Acetic acid (1 : 2)	298.15	210	0.042768	0.338019	0.677587	3.94407	3.54552	1.96829	1.17042	1.72881	1.05855	0.001003	-4.9458	Training	-5.04717	0.00393578	-1.00287
[BHDE]Cl-Acetic acid (1 : 2)	298.15	533	0.042768	0.338019	0.677587	3.94407	3.54552	1.96829	1.17042	1.72881	1.05855	0.001003	-3.8263	Training	-3.90477	0.00360502	-0.674254
[BHDE]Cl-Acetic acid (1 : 2)	298.15	857	0.042768	0.338019	0.677587	3.94407	3.54552	1.96829	1.17042	1.72881	1.05855	0.001003	-3.3858	Testing	-3.30173	0.00343057	-1.69074
[BHDE]Cl-Acetic acid (1 : 2)	298.15	1167	0.042768	0.338019	0.677587	3.94407	3.54552	1.96829	1.17042	1.72881	1.05855	0.001003	-3.0104	Testing	-2.87729	0.00341118	-1.06293
[BHDE]Cl-Acetic acid (1 : 2)	298.15	1440	0.042768	0.338019	0.677587	3.94407	3.54552	1.96829	1.17042	1.72881	1.05855	0.001003	-2.7334	Training	-2.60649	0.00351355	-0.610331
[BHDE]Cl-Acetic acid (1 : 2)	298.15	1771	0.042768	0.338019	0.677587	3.94407	3.54552	1.96829	1.17042	1.72881	1.05855	0.001003	-2.5279	Training	-2.37747	0.00378772	-0.388416
[BHDE]Cl-Acetic acid (1 : 2)	298.15	2026	0.042768	0.338019	0.677587	3.94407	3.54552	1.96829	1.17042	1.72881	1.05855	0.001003	-2.4508	Testing	-2.25214	0.0041111	-0.437374
[BHDE]Cl-Lactic acid (1 : 2)	298.15	283	0.039963	0.469755	1.06784	3.99921	3.6505	2.38973	1.37568	2.1097	1.11736	0.001003	-6.1625	Training	-5.8786	0.0109405	-4.27931
[BHDE]Cl-Lactic acid (1 : 2)	298.15	516	0.039963	0.469755	1.06784	3.99921	3.6505	2.38973	1.37568	2.1097	1.11736	0.001003	-5.1775	Testing	-5.11922	0.0107061	-3.58756
[BHDE]Cl-Lactic acid (1 : 2)	298.15	866	0.039963	0.469755	1.06784	3.99921	3.6505	2.38973	1.37568	2.1097	1.11736	0.001003	-4.145	Testing	-4.36897	0.0105071	-3.28624
[BHDE]Cl-Lactic acid (1 : 2)	298.15	1134	0.039963	0.469755	1.06784	3.99921	3.6505	2.38973	1.37568	2.1097	1.11736	0.001003	-3.769	Training	-3.88561	0.0104791	-2.64008
[BHDE]Cl-Lactic acid (1 : 2)	298.15	1458	0.039963	0.469755	1.06784	3.99921	3.6505	2.38973	1.37568	2.1097	1.11736	0.001003	-3.338	Testing	-3.42969	0.0105892	-1.87846
[BHDE]Cl-Lactic acid (1 : 2)	298.15	1722	0.039963	0.469755	1.06784	3.99921	3.6505	2.38973	1.37568	2.1097	1.11736	0.001003	-3.0146	Training	-3.1651	0.0107953	-1.3253
[BHDE]Cl-Lactic acid (1 : 2)	298.15	2086	0.039963	0.469755	1.06784	3.99921	3.6505	2.38973	1.37568	2.1097	1.11736	0.001003	-2.7861	Testing	-2.92701	0.0112512	-1.09015
[Ch]Cl-Phenol (1 : 2)	313.15	1990	0.031878	0.365013	0.762537	4.21038	2.74955	2.429	2.1419	0.939945	1.24956	0.001292	-2.4304	Training	-2.44981	0.00419005	0.46752
[Ch]Cl-Phenol (1 : 2)	313.15	3460	0.031878	0.365013	0.762537	4.21038	2.74955	2.429	2.1419	0.939945	1.24956	0.001292	-2.0691	Testing	-2.08893	0.00847348	0.110597
[Ch]Cl-Phenol (1 : 2)	313.15	5010	0.031878	0.365013	0.762537	4.21038	2.74955	2.429	2.1419	0.939945	1.24956	0.001292	-1.832	Training	-1.78278	0.0165033	-0.526062
[Ch]Cl-Phenol (1 : 2)	323.15	1710	0.031878	0.365013	0.762537	4.21038	2.74955	2.429	2.1419	0.939945	1.24956	0.001292	-2.6521	Training	-2.77674	0.00325264	0.416094
[Ch]Cl-Phenol (1 : 2)	323.15	2460	0.031878	0.365013	0.762537	4.21038	2.74955	2.429	2.1419	0.939945	1.24956	0.001292	-2.4079	Training	-2.44115	0.00462766	0.395359
[Ch]Cl-Phenol (1 : 2)	323.15	4390	0.031878	0.365013	0.762537	4.21038	2.74955	2.429	2.1419	0.939945	1.24956	0.001292	-1.998	Training	-2.05254	0.0120481	-0.174641
[Ch]Cl-Phenol (1 : 2)	323.15	5410	0.031878	0.365013	0.762537	4.21038	2.74955	2.429	2.1419	0.939945	1.24956	0.001292	-1.8689	Training	-1.86952	0.0182282	-0.682844
[Ch]Cl-Phenol (1 : 2)	333.15	2820	0.031878	0.365013	0.762537	4.21038	2.74955	2.429	2.1419	0.939945	1.24956	0.001292	-2.5627	Testing	-2.494	0.00515264	-0.0440532
[Ch]Cl-Phenol (1 : 2)	333.15	3810	0.031878	0.365013	0.762537	4.21038	2.74955	2.429	2.1419	0.939945	1.24956	0.001292	-2.2528	Testing	-2.30424	0.00867688	-0.0997307
[Ch]Cl-Phenol (1 : 2)	333.15	5610	0.031878	0.365013	0.762537	4.21038	2.74955	2.429	2.1419	0.939945	1.24956	0.001292	-1.9988	Training	-2.01109	0.0188538	-0.900017
[Ch]Cl-Phenol (1 : 2)	333.15	7620	0.031878	0.365013	0.762537	4.21038	2.74955	2.429	2.1419	0.939945	1.24956	0.001292	-1.755	Testing	-1.72931	0.0359657	-1.92467
[TEA]Br-Hexanoic acid (1 : 2)	303.15	412	0.035112	0.340164	0.37219	3.54263	7.58791	3.27915	0.803695	1.41617	1.42892	0	-3.4265	Training	-3.54956	0.00349438	0.832455
[TEA]Br-Hexanoic acid (1 : 2)	303.15	521	0.035112	0.340164	0.37219	3.54263	7.58791	3.27915	0.803695	1.41617	1.42892	0	-3.2493	Training	-3.30392	0.003434	0.469077
[TEA]Br-Hexanoic acid (1 : 2)	303.15	609	0.035112	0.340164	0.37219	3.54263	7.58791	3.27915	0.803695	1.41617	1.42892	0	-3.0769	Testing	-3.14237	0.00339826	0.20434
[TEA]Br-Hexanoic acid (1 : 2)	303.15	688	0.035112	0.340164	0.37219	3.54263	7.58791	3.27915	0.803695	1.41617	1.42892	0	-2.9394	Training	-3.01569	0.00337608	0.00315964
[TEA]Br-Hexanoic acid (1 : 2)	303.15	803	0.035112	0.340164	0.37219	3.54263	7.58791	3.27915	0.803695	1.41617	1.42892	0	-2.7504	Testing	-2.8537	0.00336054	-0.403945
[TEA]Br-Hexanoic acid (1 : 2)	303.15	913	0.035112	0.340164	0.37219	3.54263	7.58791	3.27915	0.803695	1.41617	1.42892	0	-2.6242	Testing	-2.71777	0.00336425	-0.274465
[TEA]Br-Hexanoic acid (1 : 2)	303.15	1130	0.035112	0.340164	0.37219	3.54263	7.58791	3.27915	0.803695	1.41617	1.42892	0	-2.4248	Testing	-2.48986	0.00342483	0.0180861
[TEA]Br-Hexanoic acid (1 : 2)	313.15	528	0.035112	0.340164	0.37219	3.54263	7.58791	3.27915	0.803695	1.41617	1.42892	0	-3.3843	Training	-3.3667	0.00352709	0.541623
[TEA]Br-Hexanoic acid (1 : 2)	313.15	627	0.035112	0.340164	0.37219	3.54263	7.58791	3.27915	0.803695	1.41617	1.42892	0	-3.2065	Training	-3.19345	0.00347688	0.25144
[TEA]Br-Hexanoic acid (1 : 2)	313.15	727	0.035112	0.340164	0.37219	3.54263	7.58791	3.27915	0.803695	1.41617	1.42892	0	-3.0366	Testing	-3.04361	0.0034411	-0.0992614
[TEA]Br-Hexanoic acid (1 : 2)	313.15	804	0.035112	0.340164	0.37219	3.54263	7.58791	3.27915	0.803695	1.41617	1.42892	0	-2.8914	Training	-2.94065	0.00342378	-0.273958
[TEA]Br-Hexanoic acid (1 : 2)	313.15	955	0.035112	0.340164	0.37219	3.54263	7.58791	3.27915	0.803695	1.41617	1.42892	0	-2.771	Training	-2.76213	0.00341565	-0.374438
[TEA]Br-Hexanoic acid (1 : 2)	313.15	1084	0.035112	0.340164	0.37219	3.54263	7.58791	3.27915	0.803695	1.41617	1.42892	0	-2.5783	Training	-2.62841	0.00343581	-0.0216921
[TEA]Br-Hexanoic acid (1 : 2)	313.15	1129	0.035112	0.340164	0.37219	3.54263	7.58791	3.27915	0.803695	1.41617	1.42892	0	-2.5396	Training	-2.58499	0.00344872	0.0339233
[TEA]Br-Hexanoic acid (1 : 2)	323.15	423	0.035112	0.340164	0.37219	3.54263	7.58791	3.27915	0.803695	1.41617	1.42892	0	-3.677	Training	-3.6969	0.00389273	1.04519
[TEA]Br-Hexanoic acid (1 : 2)	323.15	521	0.035112	0.340164	0.37219	3.54263	7.58791	3.27915	0.803695	1.41617	1.42892	0	-3.49	Testing	-3.48755	0.00381576	0.73262
[TEA]Br-Hexanoic acid (1 : 2)	323.15	685	0.035112	0.340164	0.37219	3.54263	7.58791	3.27915	0.803695	1.41617	1.42892	0	-3.2114	Testing	-3.21635	0.00371921	0.224402
[TEA]Br-Hexanoic acid (1 : 2)	323.15	821	0.035112	0.340164	0.37219	3.54263	7.58791	3.27915	0.803695	1.41617	1.42892	0	-3.0386	Training	-3.03413	0.00366976	-0.302033
[TEA]Br-Hexanoic acid (1 : 2)	323.15	900	0.035112	0.340164	0.37219	3.54263	7.58791	3.27915	0.803695	1.41617	1.42892	0	-2.9243	Training	-2.9399	0.00365379	-0.443575
[TEA]Br-Hexanoic acid (1 : 2)	323.15	1132	0.035112	0.340164	0.37219	3.54263	7.58791	3.27915	0.803695	1.41617	1.42892	0	-2.7121	Testing	-2.69742	0.00366103	-0.160305
[TEA]Br-Hexanoic acid (1 : 2)	323.15	1263	0.035112	0.340164	0.37219	3.54263	7.58791	3.27915	0.803695	1.41617	1.42892	0	-2.5996	Training	-2.57679	0.00370081	0.0346583
L-menthol-thymol (1 : 2)	293.15	4020.1	0.016269	0.405076	0.314622	1.28224	8.6209	6.9765	2.03233	0.531451	0.184132	0.00119	-0.9337	Testing	-1.08928	0.0128464	0.0638879
L-menthol-thymol (1 : 2)	293.15	3369.1	0.016269	0.405076	0.314622	1.28224	8.6209	6.9765	2.03233	0.531451	0.184132	0.00119	-1.0573	Testing	-1.17277	0.0103829	0.286365
L-menthol-thymol (1 : 2)	293.15	2486	0.016269	0.405076	0.314622	1.28224	8.6209	6.9765	2.03233	0.531451	0.184132	0.00119	-1.3406	Training	-1.31954	0.00805781	0.363178
L-menthol-thymol (1 : 2)	293.15	1628.1	0.016269	0.405076	0.314622	1.28224	8.6209	6.9765	2.03233	0.531451	0.184132	0.00119	-1.7193	Training	-1.668	0.00692009	0.151948
L-menthol-thymol (1 : 2)	303.15	4096.7	0.016269	0.405076	0.314622	1.28224	8.6209	6.9765	2.03233	0.531451	0.184132	0.00119	-1.0533	Testing	-1.14491	0.0136059	-0.0286671
L-menthol-thymol (1 : 2)	303.15	3424.7	0.016269	0.405076	0.314622	1.28224	8.6209	6.9765	2.03233	0.531451	0.184132	0.00119	-1.1523	Testing	-1.24398	0.0110768	0.267252
L-menthol-thymol (1 : 2)	303.15	2522.9	0.016269	0.405076	0.314622	1.28224	8.6209	6.9765	2.03233	0.531451	0.184132	0.00119	-1.4292	Training	-1.41361	0.00874795	0.373728
L-menthol-thymol (1 : 2)	303.15	1647.8	0.016269	0.405076	0.314622	1.28224	8.6209	6.9765	2.03233	0.531451	0.184132	0.00119	-1.7964	Testing	-1.78901	0.00765513	0.163486
L-menthol-thymol (1 : 2)	313.15	4154.3	0.016269	0.405076	0.314622	1.28224	8.6209	6.9765	2.03233	0.531451	0.184132	0.00119	-1.132	Testing	-1.21399	0.0144625	-0.0115602
L-menthol-thymol (1 : 2)	313.15	3470.3	0.016269	0.405076	0.314622	1.28224	8.6209	6.9765	2.03233	0.531451	0.184132	0.00119	-1.2676	Training	-1.32457	0.0119172	0.249731
L-menthol-thymol (1 : 2)	313.15	2554.1	0.016269	0.405076	0.314622	1.28224	8.6209	6.9765	2.03233	0.531451	0.184132	0.00119	-1.5055	Training	-1.50822	0.00960818	0.417905
L-menthol-thymol (1 : 2)	313.15	1666.2	0.016269	0.405076	0.314622	1.28224	8.6209	6.9765	2.03233	0.531451	0.184132	0.00119	-1.8663	Testing	-1.8981	0.00857274	0.23164
L-menthol-thymol (1 : 2)	323.15	4193.9	0.016269	0.405076	0.314622	1.28224	8.6209	6.9765	2.03233	0.531451	0.184132	0.00119	-1.177	Testing	-1.29626	0.0154223	0.0977371
L-menthol-thymol (1 : 2)	323.15	3505.9	0.016269	0.405076	0.314622	1.28224	8.6209	6.9765	2.03233	0.531451	0.184132	0.00119	-1.3409	Testing	-1.41205	0.0129057	0.255726
L-menthol-thymol (1 : 2)	323.15	2590	0.016269	0.405076	0.314622	1.28224	8.6209	6.9765	2.03233	0.531451	0.184132	0.00119	-1.5664	Testing	-1.59644	0.010658	0.449109
L-menthol-thymol (1 : 2)	323.15	1681.9	0.016269	0.405076	0.314622	1.28224	8.6209	6.9765	2.03233	0.531451	0.184132	0.00119	-1.9366	Training	-1.99036	0.0096727	0.34365
[Ch]Cl-Urea (1 : 2.5)	313.15	1150	0	0.56746	1.92185	2.74192	1.43604	1.02764	0.74637	1.26074	2.0032	0.0177068	-3.0791	Training	-2.93714	0.0120581	0.912975
[Ch]Cl-Urea (1 : 2.5)	313.15	2670	0	0.56746	1.92185	2.74192	1.43604	1.02764	0.74637	1.26074	2.0032	0.0177068	-2.4304	Training	-2.31888	0.0116029	1.23457
[Ch]Cl-Urea (1 : 2.5)	313.15	4530	0	0.56746	1.92185	2.74192	1.43604	1.02764	0.74637	1.26074	2.0032	0.0177068	-2.0794	Training	-2.0621	0.0157644	0.581133
[Ch]Cl-Urea (1 : 2.5)	313.15	6670	0	0.56746	1.92185	2.74192	1.43604	1.02764	0.74637	1.26074	2.0032	0.0177068	-1.8643	Training	-1.86172	0.026977	-0.616929
[Ch]Cl-Urea (1 : 2.5)	323.15	1060	0	0.56746	1.92185	2.74192	1.43604	1.02764	0.74637	1.26074	2.0032	0.0177068	-3.2442	Training	-3.16732	0.0122764	0.84385
[Ch]Cl-Urea (1 : 2.5)	323.15	2500	0	0.56746	1.92185	2.74192	1.43604	1.02764	0.74637	1.26074	2.0032	0.0177068	-2.551	Testing	-2.49733	0.0113915	1.27235
[Ch]Cl-Urea (1 : 2.5)	323.15	4120	0	0.56746	1.92185	2.74192	1.43604	1.02764	0.74637	1.26074	2.0032	0.0177068	-2.2349	Testing	-2.2148	0.0141167	0.738476
[Ch]Cl-Urea (1 : 2.5)	323.15	6200	0	0.56746	1.92185	2.74192	1.43604	1.02764	0.74637	1.26074	2.0032	0.0177068	-2.0099	Training	-1.91785	0.0233918	-0.336899
[Ch]Cl-Urea (1 : 2.5)	333.15	1080	0	0.56746	1.92185	2.74192	1.43604	1.02764	0.74637	1.26074	2.0032	0.0177068	-3.442	Training	-3.32118	0.0125103	0.609683
[Ch]Cl-Urea (1 : 2.5)	333.15	2540	0	0.56746	1.92185	2.74192	1.43604	1.02764	0.74637	1.26074	2.0032	0.0177068	-2.6882	Training	-2.67076	0.0115039	1.22763
[Ch]Cl-Urea (1 : 2.5)	333.15	4030	0	0.56746	1.92185	2.74192	1.43604	1.02764	0.74637	1.26074	2.0032	0.0177068	-2.4079	Training	-2.35174	0.0137759	0.702102
[Ch]Cl-Urea (1 : 2.5)	333.15	5980	0	0.56746	1.92185	2.74192	1.43604	1.02764	0.74637	1.26074	2.0032	0.0177068	-2.1456	Testing	-1.98603	0.0217839	-0.264195
ChCl-DEG (1 : 3)	293.15	112.8	0	0.108825	1.05878	3.95827	5.29764	1.23768	0.833087	1.5012	1.77493	0.00095	-5.5994	Testing	-5.52474	0.00450866	-0.82984
ChCl-DEG (1 : 3)	293.15	212.2	0	0.108825	1.05878	3.95827	5.29764	1.23768	0.833087	1.5012	1.77493	0.00095	-4.8796	Training	-4.90097	0.0044307	-0.744008
ChCl-DEG (1 : 3)	293.15	314.9	0	0.108825	1.05878	3.95827	5.29764	1.23768	0.833087	1.5012	1.77493	0.00095	-4.5099	Testing	-4.47192	0.00436574	-0.631034
ChCl-DEG (1 : 3)	293.15	409.8	0	0.108825	1.05878	3.95827	5.29764	1.23768	0.833087	1.5012	1.77493	0.00095	-4.2199	Training	-4.19439	0.00431979	-0.602486
ChCl-DEG (1 : 3)	293.15	512.9	0	0.108825	1.05878	3.95827	5.29764	1.23768	0.833087	1.5012	1.77493	0.00095	-3.9686	Testing	-3.96309	0.00428518	-0.769557
ChCl-DEG (1 : 3)	303.15	117.7	0	0.108825	1.05878	3.95827	5.29764	1.23768	0.833087	1.5012	1.77493	0.00095	-5.5994	Training	-5.62554	0.0040033	-0.38691
ChCl-DEG (1 : 3)	303.15	215.1	0	0.108825	1.05878	3.95827	5.29764	1.23768	0.833087	1.5012	1.77493	0.00095	-4.9762	Training	-5.02938	0.00391581	-0.55124
ChCl-DEG (1 : 3)	303.15	321.3	0	0.108825	1.05878	3.95827	5.29764	1.23768	0.833087	1.5012	1.77493	0.00095	-4.5564	Training	-4.59938	0.00383665	-0.320914
ChCl-DEG (1 : 3)	303.15	415.1	0	0.108825	1.05878	3.95827	5.29764	1.23768	0.833087	1.5012	1.77493	0.00095	-4.2977	Training	-4.33542	0.00378081	-0.382493
ChCl-DEG (1 : 3)	303.15	524	0	0.108825	1.05878	3.95827	5.29764	1.23768	0.833087	1.5012	1.77493	0.00095	-4.0804	Training	-4.1019	0.00373255	-0.65034
ChCl-DEG (1 : 3)	313.15	116.9	0	0.108825	1.05878	3.95827	5.29764	1.23768	0.833087	1.5012	1.77493	0.00095	-5.8091	Testing	-5.79285	0.00369037	-0.386791
ChCl-DEG (1 : 3)	313.15	219.6	0	0.108825	1.05878	3.95827	5.29764	1.23768	0.833087	1.5012	1.77493	0.00095	-5.1328	Training	-5.17434	0.0035861	-0.511822
ChCl-DEG (1 : 3)	313.15	327	0	0.108825	1.05878	3.95827	5.29764	1.23768	0.833087	1.5012	1.77493	0.00095	-4.6995	Training	-4.75379	0.00349399	-0.258189
ChCl-DEG (1 : 3)	313.15	417.7	0	0.108825	1.05878	3.95827	5.29764	1.23768	0.833087	1.5012	1.77493	0.00095	-4.4741	Testing	-4.5068	0.00342969	-0.404797
ChCl-DEG (1 : 3)	313.15	515.7	0	0.108825	1.05878	3.95827	5.29764	1.23768	0.833087	1.5012	1.77493	0.00095	-4.2545	Testing	-4.30096	0.00337409	-0.585357
ChCl-DEG (1 : 3)	323.15	122.5	0	0.108825	1.05878	3.95827	5.29764	1.23768	0.833087	1.5012	1.77493	0.00095	-5.9915	Training	-5.933	0.00355725	-0.378781
ChCl-DEG (1 : 3)	323.15	220.3	0	0.108825	1.05878	3.95827	5.29764	1.23768	0.833087	1.5012	1.77493	0.00095	-5.3817	Testing	-5.35616	0.0034467	-0.686274
ChCl-DEG (1 : 3)	323.15	321	0	0.108825	1.05878	3.95827	5.29764	1.23768	0.833087	1.5012	1.77493	0.00095	-4.9908	Training	-4.96224	0.00334787	-0.461892
ChCl-DEG (1 : 3)	323.15	421.2	0	0.108825	1.05878	3.95827	5.29764	1.23768	0.833087	1.5012	1.77493	0.00095	-4.6886	Training	-4.69179	0.00326463	-0.466556
ChCl-DEG (1 : 3)	323.15	518	0	0.108825	1.05878	3.95827	5.29764	1.23768	0.833087	1.5012	1.77493	0.00095	-4.4568	Training	-4.49373	0.00319854	-0.613271
ChCl-FA (1 : 3)	303.15	80.9	0	0.210375	0.897637	4.16775	2.79867	2.41979	1.82515	0.950738	1.27966	0.00095	-5.843	Training	-5.88914	0.00340861	-0.163333
ChCl-FA (1 : 3)	303.15	218.3	0	0.210375	0.897637	4.16775	2.79867	2.41979	1.82515	0.950738	1.27966	0.00095	-4.8796	Training	-4.91406	0.00326193	-0.204189
ChCl-FA (1 : 3)	303.15	323.7	0	0.210375	0.897637	4.16775	2.79867	2.41979	1.82515	0.950738	1.27966	0.00095	-4.4741	Training	-4.47749	0.00316861	-0.00193141
ChCl-FA (1 : 3)	303.15	425.3	0	0.210375	0.897637	4.16775	2.79867	2.41979	1.82515	0.950738	1.27966	0.00095	-4.2199	Training	-4.21692	0.00309445	-0.130135
ChCl-FA (1 : 3)	303.15	524.1	0	0.210375	0.897637	4.16775	2.79867	2.41979	1.82515	0.950738	1.27966	0.00095	-4.023	Testing	-4.04212	0.00303719	-0.402318
ChCl-FA (1 : 3)	303.15	582.8	0	0.210375	0.897637	4.16775	2.79867	2.41979	1.82515	0.950738	1.27966	0.00095	-3.9271	Testing	-3.95671	0.00301011	-0.593074
ChCl-FA (1 : 3)	313.15	80.8	0	0.210375	0.897637	4.16775	2.79867	2.41979	1.82515	0.950738	1.27966	0.00095	-6.0323	Testing	-6.017	0.00342397	-0.132589
ChCl-FA (1 : 3)	313.15	214.6	0	0.210375	0.897637	4.16775	2.79867	2.41979	1.82515	0.950738	1.27966	0.00095	-5.0672	Training	-5.05995	0.00326471	-0.179211
ChCl-FA (1 : 3)	313.15	321.4	0	0.210375	0.897637	4.16775	2.79867	2.41979	1.82515	0.950738	1.27966	0.00095	-4.6565	Testing	-4.60997	0.00315688	-0.0111321
ChCl-FA (1 : 3)	313.15	426.7	0	0.210375	0.897637	4.16775	2.79867	2.41979	1.82515	0.950738	1.27966	0.00095	-4.3741	Testing	-4.33735	0.00306733	-0.097488
ChCl-FA (1 : 3)	313.15	523.2	0	0.210375	0.897637	4.16775	2.79867	2.41979	1.82515	0.950738	1.27966	0.00095	-4.1669	Testing	-4.16481	0.00299987	-0.296236
ChCl-FA (1 : 3)	313.15	581.7	0	0.210375	0.897637	4.16775	2.79867	2.41979	1.82515	0.950738	1.27966	0.00095	-4.057	Training	-4.07824	0.00296578	-0.425555
ChCl-FA (1 : 3)	323.15	81.5	0	0.210375	0.897637	4.16775	2.79867	2.41979	1.82515	0.950738	1.27966	0.00095	-6.0748	Training	-6.15338	0.00362559	0.298931
ChCl-FA (1 : 3)	323.15	222.1	0	0.210375	0.897637	4.16775	2.79867	2.41979	1.82515	0.950738	1.27966	0.00095	-5.185	Testing	-5.16166	0.00344225	-0.104148
ChCl-FA (1 : 3)	323.15	329.6	0	0.210375	0.897637	4.16775	2.79867	2.41979	1.82515	0.950738	1.27966	0.00095	-4.7795	Training	-4.72323	0.0033221	0.117599
ChCl-FA (1 : 3)	323.15	428.9	0	0.210375	0.897637	4.16775	2.79867	2.41979	1.82515	0.950738	1.27966	0.00095	-4.5099	Testing	-4.46942	0.00322652	0.00555638
ChCl-FA (1 : 3)	323.15	528.6	0	0.210375	0.897637	4.16775	2.79867	2.41979	1.82515	0.950738	1.27966	0.00095	-4.3125	Training	-4.28977	0.00314545	-0.20655
ChCl-FA (1 : 3)	323.15	585.3	0	0.210375	0.897637	4.16775	2.79867	2.41979	1.82515	0.950738	1.27966	0.00095	-4.2131	Testing	-4.20457	0.00310599	-0.406995
ChCl-FA (1 : 3)	333.15	86.3	0	0.210375	0.897637	4.16775	2.79867	2.41979	1.82515	0.950738	1.27966	0.00095	-6.32	Training	-6.26827	0.00400815	0.143859
ChCl-FA (1 : 3)	333.15	224.4	0	0.210375	0.897637	4.16775	2.79867	2.41979	1.82515	0.950738	1.27966	0.00095	-5.3602	Training	-5.30518	0.00381226	-0.0567885
ChCl-FA (1 : 3)	333.15	330.3	0	0.210375	0.897637	4.16775	2.79867	2.41979	1.82515	0.950738	1.27966	0.00095	-4.9337	Training	-4.87356	0.00368143	0.189967
ChCl-FA (1 : 3)	333.15	430.4	0	0.210375	0.897637	4.16775	2.79867	2.41979	1.82515	0.950738	1.27966	0.00095	-4.6565	Testing	-4.615	0.00357325	0.0884918
ChCl-FA (1 : 3)	333.15	530.6	0	0.210375	0.897637	4.16775	2.79867	2.41979	1.82515	0.950738	1.27966	0.00095	-4.4397	Training	-4.43076	0.00348003	-0.0796737
ChCl-FA (1 : 3)	333.15	586.4	0	0.210375	0.897637	4.16775	2.79867	2.41979	1.82515	0.950738	1.27966	0.00095	-4.3505	Training	-4.34441	0.00343465	-0.269275
ChCl-LEV (1 : 3)	303.15	79.4	0	0	0.625687	5.86388	3.65454	0.91525	1.13987	2.23252	1.28615	0.00095	-5.4491	Testing	-5.44041	0.00482339	0.0675646
ChCl-LEV (1 : 3)	303.15	208.4	0	0	0.625687	5.86388	3.65454	0.91525	1.13987	2.23252	1.28615	0.00095	-4.5008	Testing	-4.50267	0.00479366	0.0216531
ChCl-LEV (1 : 3)	303.15	310.9	0	0	0.625687	5.86388	3.65454	0.91525	1.13987	2.23252	1.28615	0.00095	-4.1105	Testing	-4.03919	0.00478784	0.205114
ChCl-LEV (1 : 3)	303.15	411.9	0	0	0.625687	5.86388	3.65454	0.91525	1.13987	2.23252	1.28615	0.00095	-3.8397	Testing	-3.73653	0.00479754	0.122127
ChCl-LEV (1 : 3)	303.15	510.9	0	0	0.625687	5.86388	3.65454	0.91525	1.13987	2.23252	1.28615	0.00095	-3.6119	Training	-3.51951	0.0048219	-0.0107438
ChCl-LEV (1 : 3)	303.15	570	0	0	0.625687	5.86388	3.65454	0.91525	1.13987	2.23252	1.28615	0.00095	-3.4999	Testing	-3.41031	0.00484346	-0.202712
ChCl-LEV (1 : 3)	313.15	69.8	0	0	0.625687	5.86388	3.65454	0.91525	1.13987	2.23252	1.28615	0.00095	-5.7764	Testing	-5.71446	0.0045654	-0.0222742
ChCl-LEV (1 : 3)	313.15	202.5	0	0	0.625687	5.86388	3.65454	0.91525	1.13987	2.23252	1.28615	0.00095	-4.7105	Testing	-4.73281	0.00451737	0.121645
ChCl-LEV (1 : 3)	313.15	306.8	0	0	0.625687	5.86388	3.65454	0.91525	1.13987	2.23252	1.28615	0.00095	-4.2831	Training	-4.25863	0.00449817	0.309182
ChCl-LEV (1 : 3)	313.15	410.9	0	0	0.625687	5.86388	3.65454	0.91525	1.13987	2.23252	1.28615	0.00095	-4.0063	Testing	-3.95129	0.00449529	0.176294
ChCl-LEV (1 : 3)	313.15	508.5	0	0	0.625687	5.86388	3.65454	0.91525	1.13987	2.23252	1.28615	0.00095	-3.781	Testing	-3.74407	0.00450736	0.0117617
ChCl-LEV (1 : 3)	313.15	579.8	0	0	0.625687	5.86388	3.65454	0.91525	1.13987	2.23252	1.28615	0.00095	-3.6535	Training	-3.61902	0.00452522	-0.161651
ChCl-LEV (1 : 3)	323.15	80.8	0	0	0.625687	5.86388	3.65454	0.91525	1.13987	2.23252	1.28615	0.00095	-5.9145	Testing	-5.80915	0.00448526	-0.034759
ChCl-LEV (1 : 3)	323.15	210	0	0	0.625687	5.86388	3.65454	0.91525	1.13987	2.23252	1.28615	0.00095	-4.8929	Testing	-4.89462	0.0044248	0.0678434
ChCl-LEV (1 : 3)	323.15	314	0	0	0.625687	5.86388	3.65454	0.91525	1.13987	2.23252	1.28615	0.00095	-4.483	Training	-4.44446	0.00439434	0.226843
ChCl-LEV (1 : 3)	323.15	417.6	0	0	0.625687	5.86388	3.65454	0.91525	1.13987	2.23252	1.28615	0.00095	-4.1997	Training	-4.15433	0.00438014	0.153088
ChCl-LEV (1 : 3)	323.15	517.8	0	0	0.625687	5.86388	3.65454	0.91525	1.13987	2.23252	1.28615	0.00095	-3.9846	Training	-3.95397	0.00438173	-0.057516
ChCl-LEV (1 : 3)	323.15	579.7	0	0	0.625687	5.86388	3.65454	0.91525	1.13987	2.23252	1.28615	0.00095	-3.8728	Training	-3.85162	0.00439024	-0.237464
ChCl-LEV (1 : 3)	333.15	85.9	0	0	0.625687	5.86388	3.65454	0.91525	1.13987	2.23252	1.28615	0.00095	-5.9915	Training	-5.95071	0.00459399	0.23845
ChCl-LEV (1 : 3)	333.15	219.8	0	0	0.625687	5.86388	3.65454	0.91525	1.13987	2.23252	1.28615	0.00095	-5.0207	Training	-5.03817	0.00451678	0.138931
ChCl-LEV (1 : 3)	333.15	321.6	0	0	0.625687	5.86388	3.65454	0.91525	1.13987	2.23252	1.28615	0.00095	-4.5854	Testing	-4.62125	0.00447609	0.328931
ChCl-LEV (1 : 3)	333.15	425.2	0	0	0.625687	5.86388	3.65454	0.91525	1.13987	2.23252	1.28615	0.00095	-4.32	Training	-4.34657	0.00445065	0.256085
ChCl-LEV (1 : 3)	333.15	524.9	0	0	0.625687	5.86388	3.65454	0.91525	1.13987	2.23252	1.28615	0.00095	-4.1166	Training	-4.15849	0.00444139	0.0214058
ChCl-LEV (1 : 3)	333.15	583	0	0	0.625687	5.86388	3.65454	0.91525	1.13987	2.23252	1.28615	0.00095	-4.0009	Testing	-4.06795	0.00444287	-0.15558
ChCl-Phenol (1 : 3)	293.15	104.4	0.036225	0.414787	0.626363	3.78293	2.69851	2.7256	2.34468	0.863738	0.9254	0.00095	-5.4491	Testing	-5.59816	0.00364276	-0.426833
ChCl-Phenol (1 : 3)	293.15	206.3	0.036225	0.414787	0.626363	3.78293	2.69851	2.7256	2.34468	0.863738	0.9254	0.00095	-4.756	Training	-4.87964	0.00356255	-0.512192
ChCl-Phenol (1 : 3)	293.15	307.7	0.036225	0.414787	0.626363	3.78293	2.69851	2.7256	2.34468	0.863738	0.9254	0.00095	-4.3583	Training	-4.41924	0.00349821	-0.299666
ChCl-Phenol (1 : 3)	293.15	406.2	0.036225	0.414787	0.626363	3.78293	2.69851	2.7256	2.34468	0.863738	0.9254	0.00095	-4.1105	Training	-4.13376	0.00345048	-0.420752
ChCl-Phenol (1 : 3)	293.15	508.5	0.036225	0.414787	0.626363	3.78293	2.69851	2.7256	2.34468	0.863738	0.9254	0.00095	-3.8538	Testing	-3.9289	0.00341633	-0.573243
ChCl-Phenol (1 : 3)	303.15	113.1	0.036225	0.414787	0.626363	3.78293	2.69851	2.7256	2.34468	0.863738	0.9254	0.00095	-5.655	Training	-5.65478	0.00325811	-0.530634
ChCl-Phenol (1 : 3)	303.15	217.6	0.036225	0.414787	0.626363	3.78293	2.69851	2.7256	2.34468	0.863738	0.9254	0.00095	-4.9908	Training	-4.94532	0.0031649	-0.706477
ChCl-Phenol (1 : 3)	303.15	316.3	0.036225	0.414787	0.626363	3.78293	2.69851	2.7256	2.34468	0.863738	0.9254	0.00095	-4.5756	Testing	-4.51582	0.00309192	-0.460623
ChCl-Phenol (1 : 3)	303.15	418.3	0.036225	0.414787	0.626363	3.78293	2.69851	2.7256	2.34468	0.863738	0.9254	0.00095	-4.2759	Training	-4.23008	0.00303185	-0.45669
ChCl-Phenol (1 : 3)	303.15	514.2	0.036225	0.414787	0.626363	3.78293	2.69851	2.7256	2.34468	0.863738	0.9254	0.00095	-4.0342	Testing	-4.04059	0.00298963	-0.59821
ChCl-Phenol (1 : 3)	313.15	116	0.036225	0.414787	0.626363	3.78293	2.69851	2.7256	2.34468	0.863738	0.9254	0.00095	-5.7446	Training	-5.77709	0.00306512	-0.283821
ChCl-Phenol (1 : 3)	313.15	218.1	0.036225	0.414787	0.626363	3.78293	2.69851	2.7256	2.34468	0.863738	0.9254	0.00095	-5.0515	Training	-5.08894	0.00296208	-0.411601
ChCl-Phenol (1 : 3)	313.15	317.3	0.036225	0.414787	0.626363	3.78293	2.69851	2.7256	2.34468	0.863738	0.9254	0.00095	-4.6565	Training	-4.6581	0.00287694	-0.189669
ChCl-Phenol (1 : 3)	313.15	411.5	0.036225	0.414787	0.626363	3.78293	2.69851	2.7256	2.34468	0.863738	0.9254	0.00095	-4.3901	Testing	-4.39007	0.00280978	-0.267212
ChCl-Phenol (1 : 3)	313.15	506.8	0.036225	0.414787	0.626363	3.78293	2.69851	2.7256	2.34468	0.863738	0.9254	0.00095	-4.1605	Training	-4.19568	0.00275538	-0.377064
ChCl-Phenol (1 : 3)	323.15	123.4	0.036225	0.414787	0.626363	3.78293	2.69851	2.7256	2.34468	0.863738	0.9254	0.00095	-5.843	Training	-5.87429	0.00305342	-0.1383
ChCl-Phenol (1 : 3)	323.15	218.1	0.036225	0.414787	0.626363	3.78293	2.69851	2.7256	2.34468	0.863738	0.9254	0.00095	-5.2214	Training	-5.24671	0.00294702	-0.362353
ChCl-Phenol (1 : 3)	323.15	318.2	0.036225	0.414787	0.626363	3.78293	2.69851	2.7256	2.34468	0.863738	0.9254	0.00095	-4.8409	Testing	-4.81282	0.00284919	-0.222339
ChCl-Phenol (1 : 3)	323.15	412.5	0.036225	0.414787	0.626363	3.78293	2.69851	2.7256	2.34468	0.863738	0.9254	0.00095	-4.5469	Training	-4.54451	0.00277078	-0.171846
ChCl-Phenol (1 : 3)	323.15	513.6	0.036225	0.414787	0.626363	3.78293	2.69851	2.7256	2.34468	0.863738	0.9254	0.00095	-4.32	Training	-4.33835	0.00270155	-0.36101
ChCl-TEG (1 : 3)	293.15	109.3	0	0	0.441337	5.54767	6.15969	1.41535	1.17325	1.49891	1.73285	0.0150875	-5.2591	Training	-5.17038	0.00624088	-0.522085
ChCl-TEG (1 : 3)	293.15	208.6	0	0	0.441337	5.54767	6.15969	1.41535	1.17325	1.49891	1.73285	0.0150875	-4.5282	Testing	-4.55907	0.00625709	-0.529702
ChCl-TEG (1 : 3)	293.15	315.9	0	0	0.441337	5.54767	6.15969	1.41535	1.17325	1.49891	1.73285	0.0150875	-4.0984	Testing	-4.12858	0.00629125	-0.288455
ChCl-TEG (1 : 3)	293.15	403.3	0	0	0.441337	5.54767	6.15969	1.41535	1.17325	1.49891	1.73285	0.0150875	-3.849	Testing	-3.88569	0.00633185	-0.325349
ChCl-TEG (1 : 3)	293.15	504	0	0	0.441337	5.54767	6.15969	1.41535	1.17325	1.49891	1.73285	0.0150875	-3.5972	Training	-3.66946	0.00639284	-0.422633
ChCl-TEG (1 : 3)	303.15	119.3	0	0	0.441337	5.54767	6.15969	1.41535	1.17325	1.49891	1.73285	0.0150875	-5.3602	Testing	-5.26055	0.005867	-0.456952
ChCl-TEG (1 : 3)	303.15	212.9	0	0	0.441337	5.54767	6.15969	1.41535	1.17325	1.49891	1.73285	0.0150875	-4.7217	Training	-4.70527	0.00587207	-0.55005
ChCl-TEG (1 : 3)	303.15	319.4	0	0	0.441337	5.54767	6.15969	1.41535	1.17325	1.49891	1.73285	0.0150875	-4.2831	Training	-4.28947	0.00589383	-0.277425
ChCl-TEG (1 : 3)	303.15	416.7	0	0	0.441337	5.54767	6.15969	1.41535	1.17325	1.49891	1.73285	0.0150875	-3.9739	Training	-4.03042	0.0059286	-0.244723
ChCl-TEG (1 : 3)	303.15	512.7	0	0	0.441337	5.54767	6.15969	1.41535	1.17325	1.49891	1.73285	0.0150875	-3.7636	Training	-3.83425	0.00597683	-0.436531
ChCl-TEG (1 : 3)	313.15	114	0	0	0.441337	5.54767	6.15969	1.41535	1.17325	1.49891	1.73285	0.0150875	-5.5728	Testing	-5.48364	0.00568026	-0.356313
ChCl-TEG (1 : 3)	313.15	220.8	0	0	0.441337	5.54767	6.15969	1.41535	1.17325	1.49891	1.73285	0.0150875	-4.8536	Testing	-4.85521	0.00567345	-0.503208
ChCl-TEG (1 : 3)	313.15	318.2	0	0	0.441337	5.54767	6.15969	1.41535	1.17325	1.49891	1.73285	0.0150875	-4.5008	Training	-4.483	0.00568217	-0.34156
ChCl-TEG (1 : 3)	313.15	414.9	0	0	0.441337	5.54767	6.15969	1.41535	1.17325	1.49891	1.73285	0.0150875	-4.1734	Training	-4.22665	0.00570492	-0.261519
ChCl-TEG (1 : 3)	313.15	510.6	0	0	0.441337	5.54767	6.15969	1.41535	1.17325	1.49891	1.73285	0.0150875	-3.9425	Training	-4.03302	0.00574125	-0.402467
ChCl-TEG (1 : 3)	323.15	119.2	0	0	0.441337	5.54767	6.15969	1.41535	1.17325	1.49891	1.73285	0.0150875	-5.684	Training	-5.64528	0.00567942	-0.172193
ChCl-TEG (1 : 3)	323.15	216.7	0	0	0.441337	5.54767	6.15969	1.41535	1.17325	1.49891	1.73285	0.0150875	-5.036	Training	-5.07315	0.0056616	-0.383906
ChCl-TEG (1 : 3)	323.15	318.8	0	0	0.441337	5.54767	6.15969	1.41535	1.17325	1.49891	1.73285	0.0150875	-4.6565	Testing	-4.67935	0.00565824	-0.302611
ChCl-TEG (1 : 3)	323.15	418.6	0	0	0.441337	5.54767	6.15969	1.41535	1.17325	1.49891	1.73285	0.0150875	-4.3428	Training	-4.41621	0.00567007	-0.246623
ChCl-TEG (1 : 3)	323.15	516	0	0	0.441337	5.54767	6.15969	1.41535	1.17325	1.49891	1.73285	0.0150875	-4.1166	Testing	-4.22133	0.00569604	-0.43875
MTPPBr-LEV (1 : 3)	298.15	301	0	0	0.445937	6.45419	4.75397	3.47555	1.07241	2.10997	1.31256	0.00055	-5.469	Training	-5.3527	0.0163628	-3.44666
MTPPBr-LEV (1 : 3)	298.15	698	0	0	0.445937	6.45419	4.75397	3.47555	1.07241	2.10997	1.31256	0.00055	-4.3787	Testing	-4.20736	0.0163864	-3.68119
MTPPBr-LEV (1 : 3)	298.15	994	0	0	0.445937	6.45419	4.75397	3.47555	1.07241	2.10997	1.31256	0.00055	-3.5894	Testing	-3.614	0.016558	-2.58069
MTPPBr-LEV (1 : 3)	298.15	1209	0	0	0.445937	6.45419	4.75397	3.47555	1.07241	2.10997	1.31256	0.00055	-3.0839	Testing	-3.23324	0.0167651	-1.57703
MTPPBr-LEV (1 : 3)	298.15	1526	0	0	0.445937	6.45419	4.75397	3.47555	1.07241	2.10997	1.31256	0.00055	-2.7195	Training	-2.76115	0.017197	-0.96316
MTPPBr-LEV (1 : 3)	298.15	1759	0	0	0.445937	6.45419	4.75397	3.47555	1.07241	2.10997	1.31256	0.00055	-2.3898	Training	-2.47495	0.0176106	-0.36943
MTPPBr-LEV (1 : 3)	298.15	2068	0	0	0.445937	6.45419	4.75397	3.47555	1.07241	2.10997	1.31256	0.00055	-2.2235	Training	-2.15482	0.0182848	-0.222655
TEACl-AC (1 : 3)	298.15	397	0.0486	0.384113	0.331412	3.45149	3.71085	1.11684	0.8207	1.397	1.04781	0.0688625	-4.5303	Testing	-3.85929	0.00664229	-1.39011
TEACl-AC (1 : 3)	298.15	654	0.0486	0.384113	0.331412	3.45149	3.71085	1.11684	0.8207	1.397	1.04781	0.0688625	-3.6301	Testing	-3.41753	0.00652512	-1.11186
TEACl-AC (1 : 3)	298.15	957	0.0486	0.384113	0.331412	3.45149	3.71085	1.11684	0.8207	1.397	1.04781	0.0688625	-3.1721	Training	-3.09549	0.00651431	-1.35475
TEACl-AC (1 : 3)	298.15	1230	0.0486	0.384113	0.331412	3.45149	3.71085	1.11684	0.8207	1.397	1.04781	0.0688625	-2.8226	Training	-2.87909	0.0066226	-0.7461
TEACl-AC (1 : 3)	298.15	1634	0.0486	0.384113	0.331412	3.45149	3.71085	1.11684	0.8207	1.397	1.04781	0.0688625	-2.5477	Training	-2.61549	0.00698814	-0.418312
TEACl-AC (1 : 3)	298.15	2016	0.0486	0.384113	0.331412	3.45149	3.71085	1.11684	0.8207	1.397	1.04781	0.0688625	-2.3421	Training	-2.38527	0.00755911	-0.236833
TEACl-OCT (1 : 3)	298.15	353	0.03735	0.386925	0.333813	2.95709	9.21285	4.95864	0.900613	1.35793	1.02396	0.0688625	-3.7746	Testing	-3.47321	0.00381181	-0.366414
TEACl-OCT (1 : 3)	298.15	624	0.03735	0.386925	0.333813	2.95709	9.21285	4.95864	0.900613	1.35793	1.02396	0.0688625	-3.0227	Testing	-2.90113	0.00365285	-0.530441
TEACl-OCT (1 : 3)	298.15	940	0.03735	0.386925	0.333813	2.95709	9.21285	4.95864	0.900613	1.35793	1.02396	0.0688625	-2.4967	Training	-2.48832	0.00360672	-0.627183
TEACl-OCT (1 : 3)	298.15	1277	0.03735	0.386925	0.333813	2.95709	9.21285	4.95864	0.900613	1.35793	1.02396	0.0688625	-2.1821	Testing	-2.17726	0.00372268	-0.185039
TEACl-OCT (1 : 3)	298.15	1619	0.03735	0.386925	0.333813	2.95709	9.21285	4.95864	0.900613	1.35793	1.02396	0.0688625	-1.9553	Training	-1.94433	0.00401465	0.111409
TEACl-OCT (1 : 3)	298.15	2018	0.03735	0.386925	0.333813	2.95709	9.21285	4.95864	0.900613	1.35793	1.02396	0.0688625	-1.7595	Training	-1.72816	0.00457719	0.25616
[MTPP]Br-EG (1 : 3)	298.15	192	0	0.29385	0.825738	3.96385	3.96201	3.40753	0.663138	1.01636	1.67477	0.00055	-5.1033	Testing	-5.83762	0.0134303	-0.623006
[MTPP]Br-EG (1 : 3)	298.15	437	0	0.29385	0.825738	3.96385	3.96201	3.40753	0.663138	1.01636	1.67477	0.00055	-4.4162	Training	-4.812	0.0129787	-0.84796
[MTPP]Br-EG (1 : 3)	298.15	710	0	0.29385	0.825738	3.96385	3.96201	3.40753	0.663138	1.01636	1.67477	0.00055	-4.0024	Testing	-4.24487	0.0125815	-1.82907
[MTPP]Br-EG (1 : 3)	298.15	1134	0	0.29385	0.825738	3.96385	3.96201	3.40753	0.663138	1.01636	1.67477	0.00055	-3.6722	Training	-3.64855	0.0121865	-2.0521
[MTPP]Br-EG (1 : 3)	298.15	1528	0	0.29385	0.825738	3.96385	3.96201	3.40753	0.663138	1.01636	1.67477	0.00055	-3.4393	Training	-3.2925	0.0120613	-1.81564
[MTPP]Br-EG (1 : 3)	298.15	2018	0	0.29385	0.825738	3.96385	3.96201	3.40753	0.663138	1.01636	1.67477	0.00055	-3.087	Training	-3.01734	0.0122308	-1.37343
[Ch]Cl-1,4-butanediol (1 : 3)	293.15	110.9	0.00495	0.283275	0.7008	2.89234	5.50644	1.59681	0.748525	0.927225	1.62324	0.05855	-5.684	Training	-5.67049	0.0051936	-0.995527
[Ch]Cl-1,4-butanediol (1 : 3)	293.15	212.5	0.00495	0.283275	0.7008	2.89234	5.50644	1.59681	0.748525	0.927225	1.62324	0.05855	-4.9762	Training	-5.03253	0.00514687	-0.987223
[Ch]Cl-1,4-butanediol (1 : 3)	293.15	312.5	0.00495	0.283275	0.7008	2.89234	5.50644	1.59681	0.748525	0.927225	1.62324	0.05855	-4.6052	Training	-4.60694	0.005116	-0.827779
[Ch]Cl-1,4-butanediol (1 : 3)	293.15	412	0.00495	0.283275	0.7008	2.89234	5.50644	1.59681	0.748525	0.927225	1.62324	0.05855	-4.3351	Training	-4.303	0.00510019	-0.903316
[Ch]Cl-1,4-butanediol (1 : 3)	293.15	509.7	0.00495	0.283275	0.7008	2.89234	5.50644	1.59681	0.748525	0.927225	1.62324	0.05855	-4.1105	Training	-4.06775	0.00509912	-1.07351
[Ch]Cl-1,4-butanediol (1 : 3)	303.15	113.1	0.00495	0.283275	0.7008	2.89234	5.50644	1.59681	0.748525	0.927225	1.62324	0.05855	-5.7764	Training	-5.82596	0.00474727	-0.742814
[Ch]Cl-1,4-butanediol (1 : 3)	303.15	217.4	0.00495	0.283275	0.7008	2.89234	5.50644	1.59681	0.748525	0.927225	1.62324	0.05855	-5.116	Testing	-5.1775	0.00468735	-0.929004
[Ch]Cl-1,4-butanediol (1 : 3)	303.15	307.6	0.00495	0.283275	0.7008	2.89234	5.50644	1.59681	0.748525	0.927225	1.62324	0.05855	-4.7444	Testing	-4.7918	0.0046487	-0.702339
[Ch]Cl-1,4-butanediol (1 : 3)	303.15	406.3	0.00495	0.283275	0.7008	2.89234	5.50644	1.59681	0.748525	0.927225	1.62324	0.05855	-4.4482	Training	-4.48287	0.0046204	-0.687834
[Ch]Cl-1,4-butanediol (1 : 3)	303.15	497.5	0.00495	0.283275	0.7008	2.89234	5.50644	1.59681	0.748525	0.927225	1.62324	0.05855	-4.2545	Training	-4.25699	0.00460725	-0.884439
[Ch]Cl-1,4-butanediol (1 : 3)	313.15	121.4	0.00495	0.283275	0.7008	2.89234	5.50644	1.59681	0.748525	0.927225	1.62324	0.05855	-5.8781	Testing	-5.92633	0.00448311	-0.644931
[Ch]Cl-1,4-butanediol (1 : 3)	313.15	233.1	0.00495	0.283275	0.7008	2.89234	5.50644	1.59681	0.748525	0.927225	1.62324	0.05855	-5.2591	Testing	-5.25977	0.00440756	-0.937877
[Ch]Cl-1,4-butanediol (1 : 3)	313.15	321.6	0.00495	0.283275	0.7008	2.89234	5.50644	1.59681	0.748525	0.927225	1.62324	0.05855	-4.9199	Training	-4.89886	0.00436101	-0.753206
[Ch]Cl-1,4-butanediol (1 : 3)	313.15	410.2	0.00495	0.283275	0.7008	2.89234	5.50644	1.59681	0.748525	0.927225	1.62324	0.05855	-4.6356	Testing	-4.62664	0.00432617	-0.738792
[Ch]Cl-1,4-butanediol (1 : 3)	313.15	502.8	0.00495	0.283275	0.7008	2.89234	5.50644	1.59681	0.748525	0.927225	1.62324	0.05855	-4.4145	Testing	-4.39734	0.00430236	-0.877876
[Ch]Cl-1,4-butanediol (1 : 3)	323.15	122.8	0.00495	0.283275	0.7008	2.89234	5.50644	1.59681	0.748525	0.927225	1.62324	0.05855	-5.9915	Training	-6.06701	0.00441044	-0.403824
[Ch]Cl-1,4-butanediol (1 : 3)	323.15	218.3	0.00495	0.283275	0.7008	2.89234	5.50644	1.59681	0.748525	0.927225	1.62324	0.05855	-5.4727	Testing	-5.48088	0.00433345	-0.89555
[Ch]Cl-1,4-butanediol (1 : 3)	323.15	325.2	0.00495	0.283275	0.7008	2.89234	5.50644	1.59681	0.748525	0.927225	1.62324	0.05855	-5.0515	Testing	-5.0322	0.0042635	-0.671424
[Ch]Cl-1,4-butanediol (1 : 3)	323.15	425.9	0.00495	0.283275	0.7008	2.89234	5.50644	1.59681	0.748525	0.927225	1.62324	0.05855	-4.7677	Training	-4.72841	0.0042133	-0.699974
[Ch]Cl-1,4-butanediol (1 : 3)	323.15	525.9	0.00495	0.283275	0.7008	2.89234	5.50644	1.59681	0.748525	0.927225	1.62324	0.05855	-4.5756	Training	-4.48834	0.00417852	-0.963524
[Ch]Cl-2,3-butanediol (1 : 3)	293.15	114.3	0	0.191175	0.932737	3.1104	4.7624	2.0866	0.720738	1.12009	1.58296	0.0068	-5.7764	Training	-5.71645	0.00495323	-1.17857
[Ch]Cl-2,3-butanediol (1 : 3)	293.15	214	0	0.191175	0.932737	3.1104	4.7624	2.0866	0.720738	1.12009	1.58296	0.0068	-5.0995	Testing	-5.07148	0.00484356	-1.20557
[Ch]Cl-2,3-butanediol (1 : 3)	293.15	316.6	0	0.191175	0.932737	3.1104	4.7624	2.0866	0.720738	1.12009	1.58296	0.0068	-4.6995	Training	-4.63011	0.00474628	-0.983703
[Ch]Cl-2,3-butanediol (1 : 3)	293.15	407.9	0	0.191175	0.932737	3.1104	4.7624	2.0866	0.720738	1.12009	1.58296	0.0068	-4.4145	Testing	-4.35572	0.004673	-0.982143
[Ch]Cl-2,3-butanediol (1 : 3)	293.15	511.3	0	0.191175	0.932737	3.1104	4.7624	2.0866	0.720738	1.12009	1.58296	0.0068	-4.1865	Training	-4.11914	0.00460512	-1.16823
[Ch]Cl-2,3-butanediol (1 : 3)	303.15	114	0	0.191175	0.932737	3.1104	4.7624	2.0866	0.720738	1.12009	1.58296	0.0068	-5.8781	Training	-5.81733	0.00478337	-0.903135
[Ch]Cl-2,3-butanediol (1 : 3)	303.15	214.6	0	0.191175	0.932737	3.1104	4.7624	2.0866	0.720738	1.12009	1.58296	0.0068	-5.1499	Testing	-5.16793	0.00466068	-0.893307
[Ch]Cl-2,3-butanediol (1 : 3)	303.15	315.2	0	0.191175	0.932737	3.1104	4.7624	2.0866	0.720738	1.12009	1.58296	0.0068	-4.8036	Testing	-4.73526	0.00455318	-0.79847
[Ch]Cl-2,3-butanediol (1 : 3)	303.15	412.3	0	0.191175	0.932737	3.1104	4.7624	2.0866	0.720738	1.12009	1.58296	0.0068	-4.4918	Testing	-4.44506	0.00446383	-0.758975
[Ch]Cl-2,3-butanediol (1 : 3)	303.15	513.4	0	0.191175	0.932737	3.1104	4.7624	2.0866	0.720738	1.12009	1.58296	0.0068	-4.2759	Testing	-4.21615	0.00438583	-0.969925
[Ch]Cl-2,3-butanediol (1 : 3)	313.15	119.3	0	0.191175	0.932737	3.1104	4.7624	2.0866	0.720738	1.12009	1.58296	0.0068	-5.843	Training	-5.8982	0.00479305	-0.404404
[Ch]Cl-2,3-butanediol (1 : 3)	313.15	222.4	0	0.191175	0.932737	3.1104	4.7624	2.0866	0.720738	1.12009	1.58296	0.0068	-5.2214	Testing	-5.24984	0.00465596	-0.68062
[Ch]Cl-2,3-butanediol (1 : 3)	313.15	325.5	0	0.191175	0.932737	3.1104	4.7624	2.0866	0.720738	1.12009	1.58296	0.0068	-4.8409	Training	-4.82181	0.00453483	-0.497941
[Ch]Cl-2,3-butanediol (1 : 3)	313.15	424.9	0	0.191175	0.932737	3.1104	4.7624	2.0866	0.720738	1.12009	1.58296	0.0068	-4.5854	Training	-4.53516	0.00443316	-0.607281
[Ch]Cl-2,3-butanediol (1 : 3)	313.15	528.8	0	0.191175	0.932737	3.1104	4.7624	2.0866	0.720738	1.12009	1.58296	0.0068	-4.3662	Training	-4.30714	0.00434274	-0.834748
[Ch]Cl-2,3-butanediol (1 : 3)	323.15	124	0	0.191175	0.932737	3.1104	4.7624	2.0866	0.720738	1.12009	1.58296	0.0068	-5.9522	Training	-6.00703	0.00498976	-0.236128
[Ch]Cl-2,3-butanediol (1 : 3)	323.15	217	0	0.191175	0.932737	3.1104	4.7624	2.0866	0.720738	1.12009	1.58296	0.0068	-5.3602	Testing	-5.42148	0.00485491	-0.525884
[Ch]Cl-2,3-butanediol (1 : 3)	323.15	322	0	0.191175	0.932737	3.1104	4.7624	2.0866	0.720738	1.12009	1.58296	0.0068	-4.9477	Training	-4.9768	0.00471827	-0.283354
[Ch]Cl-2,3-butanediol (1 : 3)	323.15	421.5	0	0.191175	0.932737	3.1104	4.7624	2.0866	0.720738	1.12009	1.58296	0.0068	-4.6886	Testing	-4.68572	0.00460405	-0.413275
[Ch]Cl-2,3-butanediol (1 : 3)	323.15	514.1	0	0.191175	0.932737	3.1104	4.7624	2.0866	0.720738	1.12009	1.58296	0.0068	-4.4568	Training	-4.47779	0.00451111	-0.501469
[Ch]Cl-1,2-propanediol (1 : 3)	293.15	108.5	0.00015	0.2736	0.974775	3.12064	3.88903	1.50467	0.790975	1.13591	1.59207	0.002975	-5.7138	Testing	-5.77466	0.00281192	-0.754389
[Ch]Cl-1,2-propanediol (1 : 3)	293.15	204.7	0.00015	0.2736	0.974775	3.12064	3.88903	1.50467	0.790975	1.13591	1.59207	0.002975	-5.0672	Testing	-5.12841	0.00268626	-0.859322
[Ch]Cl-1,2-propanediol (1 : 3)	293.15	312.2	0.00015	0.2736	0.974775	3.12064	3.88903	1.50467	0.790975	1.13591	1.59207	0.002975	-4.6254	Training	-4.64403	0.00256228	-0.566863
[Ch]Cl-1,2-propanediol (1 : 3)	293.15	408.8	0.00015	0.2736	0.974775	3.12064	3.88903	1.50467	0.790975	1.13591	1.59207	0.002975	-4.3351	Training	-4.34179	0.00246567	-0.573823
[Ch]Cl-1,2-propanediol (1 : 3)	293.15	514.5	0.00015	0.2736	0.974775	3.12064	3.88903	1.50467	0.790975	1.13591	1.59207	0.002975	-4.1044	Training	-4.08852	0.002376	-0.787019
[Ch]Cl-1,2-propanediol (1 : 3)	303.15	117.5	0.00015	0.2736	0.974775	3.12064	3.88903	1.50467	0.790975	1.13591	1.59207	0.002975	-5.8781	Training	-5.90244	0.00274072	-0.771753
[Ch]Cl-1,2-propanediol (1 : 3)	303.15	222.1	0.00015	0.2736	0.974775	3.12064	3.88903	1.50467	0.790975	1.13591	1.59207	0.002975	-5.116	Testing	-5.23858	0.00259363	-0.661568
[Ch]Cl-1,2-propanediol (1 : 3)	303.15	317	0.00015	0.2736	0.974775	3.12064	3.88903	1.50467	0.790975	1.13591	1.59207	0.002975	-4.7795	Training	-4.83353	0.00247439	-0.523686
[Ch]Cl-1,2-propanediol (1 : 3)	303.15	422	0.00015	0.2736	0.974775	3.12064	3.88903	1.50467	0.790975	1.13591	1.59207	0.002975	-4.483	Testing	-4.51761	0.00235821	-0.600898
[Ch]Cl-1,2-propanediol (1 : 3)	303.15	517	0.00015	0.2736	0.974775	3.12064	3.88903	1.50467	0.790975	1.13591	1.59207	0.002975	-4.2687	Training	-4.2978	0.00226736	-0.751451
[Ch]Cl-1,2-propanediol (1 : 3)	313.15	125.4	0.00015	0.2736	0.974775	3.12064	3.88903	1.50467	0.790975	1.13591	1.59207	0.002975	-6.0323	Testing	-6.05103	0.00285661	-0.787984
[Ch]Cl-1,2-propanediol (1 : 3)	313.15	217.8	0.00015	0.2736	0.974775	3.12064	3.88903	1.50467	0.790975	1.13591	1.59207	0.002975	-5.4262	Testing	-5.47337	0.00271585	-0.917047
[Ch]Cl-1,2-propanediol (1 : 3)	313.15	317.6	0.00015	0.2736	0.974775	3.12064	3.88903	1.50467	0.790975	1.13591	1.59207	0.002975	-5.0056	Training	-5.04793	0.00257821	-0.620602
[Ch]Cl-1,2-propanediol (1 : 3)	313.15	420.5	0.00015	0.2736	0.974775	3.12064	3.88903	1.50467	0.790975	1.13591	1.59207	0.002975	-4.6777	Training	-4.74188	0.00245195	-0.583879
[Ch]Cl-1,2-propanediol (1 : 3)	313.15	515.4	0.00015	0.2736	0.974775	3.12064	3.88903	1.50467	0.790975	1.13591	1.59207	0.002975	-4.4654	Training	-4.52521	0.0023496	-0.763062
[Ch]Cl-1,2-propanediol (1 : 3)	323.15	123	0.00015	0.2736	0.974775	3.12064	3.88903	1.50467	0.790975	1.13591	1.59207	0.002975	-6.2659	Testing	-6.28437	0.00317564	-0.786874
[Ch]Cl-1,2-propanediol (1 : 3)	323.15	236	0.00015	0.2736	0.974775	3.12064	3.88903	1.50467	0.790975	1.13591	1.59207	0.002975	-5.5468	Training	-5.60237	0.0029913	-0.87255
[Ch]Cl-1,2-propanediol (1 : 3)	323.15	334.3	0.00015	0.2736	0.974775	3.12064	3.88903	1.50467	0.790975	1.13591	1.59207	0.002975	-5.1328	Testing	-5.21393	0.00284652	-0.623404
[Ch]Cl-1,2-propanediol (1 : 3)	323.15	426.3	0.00015	0.2736	0.974775	3.12064	3.88903	1.50467	0.790975	1.13591	1.59207	0.002975	-4.8536	Training	-4.95296	0.00272417	-0.599424
[Ch]Cl-1,2-propanediol (1 : 3)	323.15	524.7	0.00015	0.2736	0.974775	3.12064	3.88903	1.50467	0.790975	1.13591	1.59207	0.002975	-4.667	Training	-4.73509	0.00260736	-0.864495
[Ch]Cl-DEG (1 : 3)	303.15	564.2	0	0.108825	1.05878	3.95827	5.29764	1.23768	0.833087	1.5012	1.77493	0.00095	-4.0118	Training	-4.02766	0.00371923	-0.776679
[Ch]Cl-DEG (1 : 3)	303.15	678.3	0	0.108825	1.05878	3.95827	5.29764	1.23768	0.833087	1.5012	1.77493	0.00095	-3.8304	Training	-3.83944	0.00369465	-1.16673
[Ch]Cl-DEG (1 : 3)	303.15	735.6	0	0.108825	1.05878	3.95827	5.29764	1.23768	0.833087	1.5012	1.77493	0.00095	-3.7465	Testing	-3.75469	0.00368967	-1.38848
[Ch]Cl-DEG (1 : 3)	303.15	865.3	0	0.108825	1.05878	3.95827	5.29764	1.23768	0.833087	1.5012	1.77493	0.00095	-3.5899	Testing	-3.58259	0.00369661	-1.64711
[Ch]Cl-DEG (1 : 3)	303.15	934.2	0	0.108825	1.05878	3.95827	5.29764	1.23768	0.833087	1.5012	1.77493	0.00095	-3.4052	Training	-3.50153	0.00371057	-1.26167
[Ch]Cl-DEG (1 : 3)	303.15	1112	0	0.108825	1.05878	3.95827	5.29764	1.23768	0.833087	1.5012	1.77493	0.00095	-3.3467	Training	-3.3236	0.00377951	-1.26515
[TBA]Br-EG (1 : 3)	303.15	502.5	0	0.29385	0.695925	3.06076	6.42836	2.82032	0.5945	0.998175	1.67554	0.0019875	-4.0923	Training	-4.10408	0.00397657	-0.743102
[TBA]Br-EG (1 : 3)	303.15	744.4	0	0.29385	0.695925	3.06076	6.42836	2.82032	0.5945	0.998175	1.67554	0.0019875	-3.5099	Training	-3.64011	0.00377251	-1.10231
[TBA]Br-EG (1 : 3)	303.15	805.8	0	0.29385	0.695925	3.06076	6.42836	2.82032	0.5945	0.998175	1.67554	0.0019875	-3.4296	Training	-3.54193	0.00373469	-1.35315
[TBA]Br-EG (1 : 3)	303.15	895.2	0	0.29385	0.695925	3.06076	6.42836	2.82032	0.5945	0.998175	1.67554	0.0019875	-3.3187	Testing	-3.4092	0.00368974	-1.31306
[TBA]Br-EG (1 : 3)	303.15	1085.6	0	0.29385	0.695925	3.06076	6.42836	2.82032	0.5945	0.998175	1.67554	0.0019875	-3.1419	Training	-3.16071	0.003634	-1.03651
[TBA]Br-EG (1 : 3)	303.15	1249.1	0	0.29385	0.695925	3.06076	6.42836	2.82032	0.5945	0.998175	1.67554	0.0019875	-2.9584	Testing	-2.97788	0.00362956	-0.754577
[TBA]Br-DEG (1 : 3)	303.15	688.5	0	0.108825	0.749212	3.6455	8.86342	3.21077	0.696987	1.36046	1.8021	0.0019875	-3.2597	Testing	-3.04317	0.00459453	-0.656455
[TBA]Br-DEG (1 : 3)	303.15	896.3	0	0.108825	0.749212	3.6455	8.86342	3.21077	0.696987	1.36046	1.8021	0.0019875	-2.8319	Training	-2.7223	0.0046639	-0.527603
[TBA]Br-DEG (1 : 3)	303.15	1094.6	0	0.108825	0.749212	3.6455	8.86342	3.21077	0.696987	1.36046	1.8021	0.0019875	-2.5731	Training	-2.46948	0.00479054	-0.0738366
[TBA]Br-DEG (1 : 3)	303.15	1205	0	0.108825	0.749212	3.6455	8.86342	3.21077	0.696987	1.36046	1.8021	0.0019875	-2.4316	Testing	-2.34738	0.00488663	0.133367
[TBA]Br-methyldiethanol amine (1 : 3)	303.15	423.2	0	0.0041625	0.477488	3.60564	10.1803	3.52034	0.63095	1.047	1.87279	0.0043125	-2.4522	Testing	-2.58236	0.00856626	2.81968
[TBA]Br-methyldiethanol amine (1 : 3)	303.15	512.5	0	0.0041625	0.477488	3.60564	10.1803	3.52034	0.63095	1.047	1.87279	0.0043125	-2.331	Testing	-2.40027	0.00858302	2.47225
[TBA]Br-methyldiethanol amine (1 : 3)	303.15	614.1	0	0.0041625	0.477488	3.60564	10.1803	3.52034	0.63095	1.047	1.87279	0.0043125	-2.1481	Testing	-2.22861	0.00861664	2.18128
[TBA]Br-methyldiethanol amine (1 : 3)	303.15	732.1	0	0.0041625	0.477488	3.60564	10.1803	3.52034	0.63095	1.047	1.87279	0.0043125	-1.9126	Training	-2.06037	0.00867514	1.97146
[TBA]Br-methyldiethanol amine (1 : 3)	303.15	816.7	0	0.0041625	0.477488	3.60564	10.1803	3.52034	0.63095	1.047	1.87279	0.0043125	-1.791	Testing	-1.95511	0.00872994	1.67529
[TBA]Br-methyldiethanol amine (1 : 3)	303.15	1000	0	0.0041625	0.477488	3.60564	10.1803	3.52034	0.63095	1.047	1.87279	0.0043125	-1.5906	Training	-1.76205	0.00888555	2.07312
[Ach]Cl-Imidazole (1 : 3)	303.15	52.8	0.0007875	0.472237	0.888075	3.49863	2.59393	2.08973	1.31055	0.945913	1.26105	0.168988	-5.9145	Training	-5.77864	0.00621881	0.360433
[Ach]Cl-Imidazole (1 : 3)	303.15	91	0.0007875	0.472237	0.888075	3.49863	2.59393	2.08973	1.31055	0.945913	1.26105	0.168988	-5.2214	Testing	-5.42115	0.00619582	1.25422
[Ach]Cl-Imidazole (1 : 3)	303.15	200.3	0.0007875	0.472237	0.888075	3.49863	2.59393	2.08973	1.31055	0.945913	1.26105	0.168988	-4.5659	Testing	-4.60399	0.00614213	0.85714
[Ach]Cl-Imidazole (1 : 3)	303.15	291.4	0.0007875	0.472237	0.888075	3.49863	2.59393	2.08973	1.31055	0.945913	1.26105	0.168988	-4.1997	Testing	-4.16123	0.00611109	1.03081
[Ach]Cl-Imidazole (1 : 3)	303.15	385.4	0.0007875	0.472237	0.888075	3.49863	2.59393	2.08973	1.31055	0.945913	1.26105	0.168988	-3.9792	Testing	-3.87003	0.00609211	0.880479
[Ach]Cl-Imidazole (1 : 3)	303.15	478.6	0.0007875	0.472237	0.888075	3.49863	2.59393	2.08973	1.31055	0.945913	1.26105	0.168988	-3.7508	Testing	-3.6802	0.00608639	0.754094
[Ach]Cl-Imidazole (1 : 3)	303.15	567.6	0.0007875	0.472237	0.888075	3.49863	2.59393	2.08973	1.31055	0.945913	1.26105	0.168988	-3.5899	Testing	-3.54698	0.0060931	0.500798
[Ach]Cl-Imidazole (1 : 3)	313.15	29.2	0.0007875	0.472237	0.888075	3.49863	2.59393	2.08973	1.31055	0.945913	1.26105	0.168988	-6.0323	Testing	-6.24247	0.00596548	0.958703
[Ach]Cl-Imidazole (1 : 3)	313.15	59.9	0.0007875	0.472237	0.888075	3.49863	2.59393	2.08973	1.31055	0.945913	1.26105	0.168988	-5.684	Testing	-5.939	0.00594206	1.22775
[Ach]Cl-Imidazole (1 : 3)	313.15	87.8	0.0007875	0.472237	0.888075	3.49863	2.59393	2.08973	1.31055	0.945913	1.26105	0.168988	-5.3391	Training	-5.67852	0.005922	1.60545
[Ach]Cl-Imidazole (1 : 3)	313.15	140.2	0.0007875	0.472237	0.888075	3.49863	2.59393	2.08973	1.31055	0.945913	1.26105	0.168988	-4.9908	Testing	-5.24047	0.00588749	1.42657
[Ach]Cl-Imidazole (1 : 3)	313.15	233.6	0.0007875	0.472237	0.888075	3.49863	2.59393	2.08973	1.31055	0.945913	1.26105	0.168988	-4.5659	Testing	-4.6448	0.00583621	1.02198
[Ach]Cl-Imidazole (1 : 3)	313.15	337	0.0007875	0.472237	0.888075	3.49863	2.59393	2.08973	1.31055	0.945913	1.26105	0.168988	-4.2759	Testing	-4.22431	0.0057947	0.966611
[Ach]Cl-Imidazole (1 : 3)	313.15	424.5	0.0007875	0.472237	0.888075	3.49863	2.59393	2.08973	1.31055	0.945913	1.26105	0.168988	-4.057	Training	-3.9971	0.00577211	0.912143
[Ach]Cl-Imidazole (1 : 3)	313.15	522.8	0.0007875	0.472237	0.888075	3.49863	2.59393	2.08973	1.31055	0.945913	1.26105	0.168988	-3.8728	Training	-3.81805	0.00576044	0.642116
[Ach]Cl-Imidazole (1 : 3)	313.15	583.6	0.0007875	0.472237	0.888075	3.49863	2.59393	2.08973	1.31055	0.945913	1.26105	0.168988	-3.7766	Training	-3.72861	0.00576049	0.433178
[Ach]Cl-Imidazole (1 : 3)	323.15	26.3	0.0007875	0.472237	0.888075	3.49863	2.59393	2.08973	1.31055	0.945913	1.26105	0.168988	-6.5713	Training	-6.52377	0.00588683	0.302523
[Ach]Cl-Imidazole (1 : 3)	323.15	58	0.0007875	0.472237	0.888075	3.49863	2.59393	2.08973	1.31055	0.945913	1.26105	0.168988	-5.8781	Testing	-6.20834	0.00585874	1.31166
[Ach]Cl-Imidazole (1 : 3)	323.15	87.5	0.0007875	0.472237	0.888075	3.49863	2.59393	2.08973	1.31055	0.945913	1.26105	0.168988	-5.6268	Testing	-5.9314	0.00583395	1.3769
[Ach]Cl-Imidazole (1 : 3)	323.15	139.1	0.0007875	0.472237	0.888075	3.49863	2.59393	2.08973	1.31055	0.945913	1.26105	0.168988	-5.2214	Training	-5.49748	0.00579373	1.47674
[Ach]Cl-Imidazole (1 : 3)	323.15	238.7	0.0007875	0.472237	0.888075	3.49863	2.59393	2.08973	1.31055	0.945913	1.26105	0.168988	-4.8036	Training	-4.86334	0.0057274	0.922444
[Ach]Cl-Imidazole (1 : 3)	323.15	337.1	0.0007875	0.472237	0.888075	3.49863	2.59393	2.08973	1.31055	0.945913	1.26105	0.168988	-4.4741	Testing	-4.46278	0.00567649	0.939789
[Ach]Cl-Imidazole (1 : 3)	323.15	426	0.0007875	0.472237	0.888075	3.49863	2.59393	2.08973	1.31055	0.945913	1.26105	0.168988	-4.2616	Training	-4.22603	0.00564299	0.859603
[Ach]Cl-Imidazole (1 : 3)	323.15	531	0.0007875	0.472237	0.888075	3.49863	2.59393	2.08973	1.31055	0.945913	1.26105	0.168988	-4.0628	Training	-4.02818	0.00561871	0.576006
[Ach]Cl-Imidazole (1 : 3)	323.15	587.3	0.0007875	0.472237	0.888075	3.49863	2.59393	2.08973	1.31055	0.945913	1.26105	0.168988	-3.9633	Training	-3.94092	0.0056125	0.40717
[Ach]Cl-Imidazole (1 : 3)	333.15	28.6	0.0007875	0.472237	0.888075	3.49863	2.59393	2.08973	1.31055	0.945913	1.26105	0.168988	-7.1309	Training	-6.76756	0.0059909	-0.551207
[Ach]Cl-Imidazole (1 : 3)	333.15	58.3	0.0007875	0.472237	0.888075	3.49863	2.59393	2.08973	1.31055	0.945913	1.26105	0.168988	-6.4378	Training	-6.47132	0.00596107	0.556364
[Ach]Cl-Imidazole (1 : 3)	333.15	87.1	0.0007875	0.472237	0.888075	3.49863	2.59393	2.08973	1.31055	0.945913	1.26105	0.168988	-6.0748	Testing	-6.19968	0.00593342	0.845958
[Ach]Cl-Imidazole (1 : 3)	333.15	146.1	0.0007875	0.472237	0.888075	3.49863	2.59393	2.08973	1.31055	0.945913	1.26105	0.168988	-5.5728	Training	-5.70612	0.00588065	1.03122
[Ach]Cl-Imidazole (1 : 3)	333.15	239.7	0.0007875	0.472237	0.888075	3.49863	2.59393	2.08973	1.31055	0.945913	1.26105	0.168988	-5.0832	Training	-5.11522	0.00580766	0.696161
[Ach]Cl-Imidazole (1 : 3)	333.15	354.3	0.0007875	0.472237	0.888075	3.49863	2.59393	2.08973	1.31055	0.945913	1.26105	0.168988	-4.6995	Testing	-4.65853	0.0057362	0.729588
[Ach]Cl-Imidazole (1 : 3)	333.15	432.2	0.0007875	0.472237	0.888075	3.49863	2.59393	2.08973	1.31055	0.945913	1.26105	0.168988	-4.4918	Training	-4.4546	0.00569888	0.712799
[Ach]Cl-Imidazole (1 : 3)	333.15	525.8	0.0007875	0.472237	0.888075	3.49863	2.59393	2.08973	1.31055	0.945913	1.26105	0.168988	-4.2977	Testing	-4.26996	0.00566609	0.454175
[Ach]Cl-Imidazole (1 : 3)	333.15	591.6	0.0007875	0.472237	0.888075	3.49863	2.59393	2.08973	1.31055	0.945913	1.26105	0.168988	-4.1865	Training	-4.16116	0.0056509	0.290554
[Ch]Cl-Guaiacol (1 : 3)	293.15	51.5	0	0.1689	0.6585	4.55452	3.68593	2.98735	2.59416	0.897338	0.929225	0.00095	-6.1658	Training	-6.07191	0.00431884	-1.44182
[Ch]Cl-Guaiacol (1 : 3)	293.15	138.1	0	0.1689	0.6585	4.55452	3.68593	2.98735	2.59416	0.897338	0.929225	0.00095	-5.203	Testing	-5.29973	0.0042864	-0.736168
[Ch]Cl-Guaiacol (1 : 3)	293.15	236.7	0	0.1689	0.6585	4.55452	3.68593	2.98735	2.59416	0.897338	0.929225	0.00095	-4.667	Training	-4.66439	0.00426317	-0.839739
[Ch]Cl-Guaiacol (1 : 3)	293.15	329.2	0	0.1689	0.6585	4.55452	3.68593	2.98735	2.59416	0.897338	0.929225	0.00095	-4.3351	Testing	-4.27606	0.00425464	-0.740733
[Ch]Cl-Guaiacol (1 : 3)	293.15	427.5	0	0.1689	0.6585	4.55452	3.68593	2.98735	2.59416	0.897338	0.929225	0.00095	-4.0804	Training	-4.00669	0.00425966	-0.822248
[Ch]Cl-Guaiacol (1 : 3)	293.15	529.4	0	0.1689	0.6585	4.55452	3.68593	2.98735	2.59416	0.897338	0.929225	0.00095	-3.8397	Testing	-3.81196	0.00428017	-1.00113
[Ch]Cl-Guaiacol (1 : 3)	303.15	55.3	0	0.1689	0.6585	4.55452	3.68593	2.98735	2.59416	0.897338	0.929225	0.00095	-6.2146	Testing	-6.193	0.00390273	-1.12869
[Ch]Cl-Guaiacol (1 : 3)	303.15	132.3	0	0.1689	0.6585	4.55452	3.68593	2.98735	2.59416	0.897338	0.929225	0.00095	-5.4037	Training	-5.51086	0.00386454	-0.574524
[Ch]Cl-Guaiacol (1 : 3)	303.15	243.8	0	0.1689	0.6585	4.55452	3.68593	2.98735	2.59416	0.897338	0.929225	0.00095	-4.8036	Testing	-4.80373	0.00382501	-0.792478
[Ch]Cl-Guaiacol (1 : 3)	303.15	335.5	0	0.1689	0.6585	4.55452	3.68593	2.98735	2.59416	0.897338	0.929225	0.00095	-4.483	Training	-4.43807	0.00380649	-0.671843
[Ch]Cl-Guaiacol (1 : 3)	303.15	433.8	0	0.1689	0.6585	4.55452	3.68593	2.98735	2.59416	0.897338	0.929225	0.00095	-4.2267	Training	-4.18274	0.00380065	-0.771396
[Ch]Cl-Guaiacol (1 : 3)	303.15	533.2	0	0.1689	0.6585	4.55452	3.68593	2.98735	2.59416	0.897338	0.929225	0.00095	-4.0286	Training	-4.00192	0.0038095	-1.01645
[Ch]Cl-Guaiacol (1 : 3)	313.15	57.5	0	0.1689	0.6585	4.55452	3.68593	2.98735	2.59416	0.897338	0.929225	0.00095	-6.3771	Training	-6.32245	0.00367415	-1.02766
[Ch]Cl-Guaiacol (1 : 3)	313.15	145.7	0	0.1689	0.6585	4.55452	3.68593	2.98735	2.59416	0.897338	0.929225	0.00095	-5.4968	Training	-5.56755	0.00362087	-0.523786
[Ch]Cl-Guaiacol (1 : 3)	313.15	233.2	0	0.1689	0.6585	4.55452	3.68593	2.98735	2.59416	0.897338	0.929225	0.00095	-5.036	Training	-5.02529	0.00357954	-0.803117
[Ch]Cl-Guaiacol (1 : 3)	313.15	330.3	0	0.1689	0.6585	4.55452	3.68593	2.98735	2.59416	0.897338	0.929225	0.00095	-4.6777	Testing	-4.63181	0.00354714	-0.676002
[Ch]Cl-Guaiacol (1 : 3)	313.15	429.6	0	0.1689	0.6585	4.55452	3.68593	2.98735	2.59416	0.897338	0.929225	0.00095	-4.4063	Training	-4.37658	0.00352865	-0.723914
[Ch]Cl-Guaiacol (1 : 3)	313.15	529.4	0	0.1689	0.6585	4.55452	3.68593	2.98735	2.59416	0.897338	0.929225	0.00095	-4.1997	Training	-4.19977	0.00352497	-0.951745
[Ch]Cl-Guaiacol (1 : 3)	323.15	63.1	0	0.1689	0.6585	4.55452	3.68593	2.98735	2.59416	0.897338	0.929225	0.00095	-6.5713	Training	-6.41068	0.00362974	-1.07646
[Ch]Cl-Guaiacol (1 : 3)	323.15	160.6	0	0.1689	0.6585	4.55452	3.68593	2.98735	2.59416	0.897338	0.929225	0.00095	-5.5468	Training	-5.61193	0.00356066	-0.39797
[Ch]Cl-Guaiacol (1 : 3)	323.15	239.9	0	0.1689	0.6585	4.55452	3.68593	2.98735	2.59416	0.897338	0.929225	0.00095	-5.1673	Testing	-5.15093	0.00351499	-0.741474
[Ch]Cl-Guaiacol (1 : 3)	323.15	341.4	0	0.1689	0.6585	4.55452	3.68593	2.98735	2.59416	0.897338	0.929225	0.00095	-4.7915	Testing	-4.76533	0.00347031	-0.584588
[Ch]Cl-Guaiacol (1 : 3)	323.15	442.6	0	0.1689	0.6585	4.55452	3.68593	2.98735	2.59416	0.897338	0.929225	0.00095	-4.5375	Testing	-4.52581	0.00344116	-0.707925
[Ch]Cl-Guaiacol (1 : 3)	323.15	536.5	0	0.1689	0.6585	4.55452	3.68593	2.98735	2.59416	0.897338	0.929225	0.00095	-4.3583	Testing	-4.3706	0.00342787	-0.953282
DiethylammoniumCl-Guaiacol (1 : 3)	293.15	45.1	0.191263	0.429013	0.405388	4.2653	3.89695	3.11601	2.43045	0.522637	1.18836	0.154425	-6.0323	Testing	-5.90684	0.0194472	-0.798133
DiethylammoniumCl-Guaiacol (1 : 3)	293.15	137.1	0.191263	0.429013	0.405388	4.2653	3.89695	3.11601	2.43045	0.522637	1.18836	0.154425	-5.036	Training	-5.10176	0.0194318	-0.0672773
DiethylammoniumCl-Guaiacol (1 : 3)	293.15	222.8	0.191263	0.429013	0.405388	4.2653	3.89695	3.11601	2.43045	0.522637	1.18836	0.154425	-4.5469	Testing	-4.55307	0.0194288	-0.250521
DiethylammoniumCl-Guaiacol (1 : 3)	293.15	320.6	0.191263	0.429013	0.405388	4.2653	3.89695	3.11601	2.43045	0.522637	1.18836	0.154425	-4.1734	Training	-4.14248	0.019439	-0.0377423
DiethylammoniumCl-Guaiacol (1 : 3)	293.15	414.9	0.191263	0.429013	0.405388	4.2653	3.89695	3.11601	2.43045	0.522637	1.18836	0.154425	-3.912	Testing	-3.89308	0.0194624	-0.130561
DiethylammoniumCl-Guaiacol (1 : 3)	293.15	517.7	0.191263	0.429013	0.405388	4.2653	3.89695	3.11601	2.43045	0.522637	1.18836	0.154425	-3.6929	Training	-3.71049	0.0195031	-0.316335
DiethylammoniumCl-Guaiacol (1 : 3)	303.15	53.9	0.191263	0.429013	0.405388	4.2653	3.89695	3.11601	2.43045	0.522637	1.18836	0.154425	-6.0323	Testing	-5.93991	0.0192053	-0.451923
DiethylammoniumCl-Guaiacol (1 : 3)	303.15	133.6	0.191263	0.429013	0.405388	4.2653	3.89695	3.11601	2.43045	0.522637	1.18836	0.154425	-5.116	Testing	-5.24973	0.0191827	0.274559
DiethylammoniumCl-Guaiacol (1 : 3)	303.15	241.5	0.191263	0.429013	0.405388	4.2653	3.89695	3.11601	2.43045	0.522637	1.18836	0.154425	-4.5756	Testing	-4.58312	0.0191673	-0.0153223
DiethylammoniumCl-Guaiacol (1 : 3)	303.15	339.1	0.191263	0.429013	0.405388	4.2653	3.89695	3.11601	2.43045	0.522637	1.18836	0.154425	-4.2475	Training	-4.21004	0.0191685	0.0962552
DiethylammoniumCl-Guaiacol (1 : 3)	303.15	428.8	0.191263	0.429013	0.405388	4.2653	3.89695	3.11601	2.43045	0.522637	1.18836	0.154425	-4.0174	Testing	-3.98936	0.0191821	-0.039378
DiethylammoniumCl-Guaiacol (1 : 3)	303.15	513.5	0.191263	0.429013	0.405388	4.2653	3.89695	3.11601	2.43045	0.522637	1.18836	0.154425	-3.8351	Testing	-3.84051	0.0192061	-0.212811
DiethylammoniumCl-Guaiacol (1 : 3)	313.15	59.2	0.191263	0.429013	0.405388	4.2653	3.89695	3.11601	2.43045	0.522637	1.18836	0.154425	-6.0323	Testing	-6.02128	0.0191503	-0.0443425
DiethylammoniumCl-Guaiacol (1 : 3)	313.15	182.9	0.191263	0.429013	0.405388	4.2653	3.89695	3.11601	2.43045	0.522637	1.18836	0.154425	-4.9908	Training	-5.04188	0.0191055	0.241497
DiethylammoniumCl-Guaiacol (1 : 3)	313.15	271.2	0.191263	0.429013	0.405388	4.2653	3.89695	3.11601	2.43045	0.522637	1.18836	0.154425	-4.6052	Training	-4.58666	0.0190876	0.179844
DiethylammoniumCl-Guaiacol (1 : 3)	313.15	357.5	0.191263	0.429013	0.405388	4.2653	3.89695	3.11601	2.43045	0.522637	1.18836	0.154425	-4.3351	Testing	-4.29343	0.0190814	0.159216
DiethylammoniumCl-Guaiacol (1 : 3)	313.15	436.4	0.191263	0.429013	0.405388	4.2653	3.89695	3.11601	2.43045	0.522637	1.18836	0.154425	-4.1414	Testing	-4.10896	0.0190855	0.0530208
DiethylammoniumCl-Guaiacol (1 : 3)	313.15	524.6	0.191263	0.429013	0.405388	4.2653	3.89695	3.11601	2.43045	0.522637	1.18836	0.154425	-3.9686	Training	-3.95599	0.0191012	-0.133758
DiethylammoniumCl-Guaiacol (1 : 3)	323.15	56.6	0.191263	0.429013	0.405388	4.2653	3.89695	3.11601	2.43045	0.522637	1.18836	0.154425	-6.2659	Training	-6.18224	0.019286	-0.00387341
DiethylammoniumCl-Guaiacol (1 : 3)	323.15	143.4	0.191263	0.429013	0.405388	4.2653	3.89695	3.11601	2.43045	0.522637	1.18836	0.154425	-5.3602	Training	-5.4486	0.0192415	0.5851
DiethylammoniumCl-Guaiacol (1 : 3)	323.15	246	0.191263	0.429013	0.405388	4.2653	3.89695	3.11601	2.43045	0.522637	1.18836	0.154425	-4.8283	Testing	-4.83696	0.0192034	0.233873
DiethylammoniumCl-Guaiacol (1 : 3)	323.15	331.9	0.191263	0.429013	0.405388	4.2653	3.89695	3.11601	2.43045	0.522637	1.18836	0.154425	-4.5469	Testing	-4.50661	0.0191836	0.281711
DiethylammoniumCl-Guaiacol (1 : 3)	323.15	428.9	0.191263	0.429013	0.405388	4.2653	3.89695	3.11601	2.43045	0.522637	1.18836	0.154425	-4.2904	Training	-4.26029	0.0191746	0.234249
DiethylammoniumCl-Guaiacol (1 : 3)	323.15	525.4	0.191263	0.429013	0.405388	4.2653	3.89695	3.11601	2.43045	0.522637	1.18836	0.154425	-4.0864	Training	-4.0877	0.0191797	0.0239566
[Ach]Cl-Guaiacol (1 : 3)	293.15	53.7	0	0.1689	0.657787	4.64384	4.37761	3.1353	2.64424	1.01244	0.9027	0.0033125	-5.9522	Testing	-5.93271	0.00542595	-1.16253
[Ach]Cl-Guaiacol (1 : 3)	293.15	144.3	0	0.1689	0.657787	4.64384	4.37761	3.1353	2.64424	1.01244	0.9027	0.0033125	-5.0207	Testing	-5.13233	0.00539608	-0.591939
[Ach]Cl-Guaiacol (1 : 3)	293.15	234.1	0	0.1689	0.657787	4.64384	4.37761	3.1353	2.64424	1.01244	0.9027	0.0033125	-4.5008	Training	-4.55691	0.00537863	-0.613347
[Ach]Cl-Guaiacol (1 : 3)	293.15	331.7	0	0.1689	0.657787	4.64384	4.37761	3.1353	2.64424	1.01244	0.9027	0.0033125	-4.1352	Training	-4.14433	0.0053734	-0.449445
[Ach]Cl-Guaiacol (1 : 3)	293.15	428.8	0	0.1689	0.657787	4.64384	4.37761	3.1353	2.64424	1.01244	0.9027	0.0033125	-3.8776	Testing	-3.877	0.00538238	-0.562695
[Ach]Cl-Guaiacol (1 : 3)	293.15	528.6	0	0.1689	0.657787	4.64384	4.37761	3.1353	2.64424	1.01244	0.9027	0.0033125	-3.6652	Training	-3.68246	0.00540636	-0.751428
[Ach]Cl-Guaiacol (1 : 3)	303.15	53.8	0	0.1689	0.657787	4.64384	4.37761	3.1353	2.64424	1.01244	0.9027	0.0033125	-6.0748	Training	-6.06977	0.00501655	-0.930282
[Ach]Cl-Guaiacol (1 : 3)	303.15	139.6	0	0.1689	0.657787	4.64384	4.37761	3.1353	2.64424	1.01244	0.9027	0.0033125	-5.1673	Training	-5.31495	0.00497769	-0.319167
[Ach]Cl-Guaiacol (1 : 3)	303.15	227.1	0	0.1689	0.657787	4.64384	4.37761	3.1353	2.64424	1.01244	0.9027	0.0033125	-4.6777	Training	-4.74924	0.00494943	-0.539384
[Ach]Cl-Guaiacol (1 : 3)	303.15	329.5	0	0.1689	0.657787	4.64384	4.37761	3.1353	2.64424	1.01244	0.9027	0.0033125	-4.3125	Testing	-4.31616	0.00493096	-0.438745
[Ach]Cl-Guaiacol (1 : 3)	303.15	431.7	0	0.1689	0.657787	4.64384	4.37761	3.1353	2.64424	1.01244	0.9027	0.0033125	-4.0456	Training	-4.04332	0.00492822	-0.513362
[Ach]Cl-Guaiacol (1 : 3)	303.15	531.2	0	0.1689	0.657787	4.64384	4.37761	3.1353	2.64424	1.01244	0.9027	0.0033125	-3.8444	Training	-3.85825	0.00494061	-0.751807
[Ach]Cl-Guaiacol (1 : 3)	313.15	54.1	0	0.1689	0.657787	4.64384	4.37761	3.1353	2.64424	1.01244	0.9027	0.0033125	-6.2659	Training	-6.19654	0.00479437	-0.876954
[Ach]Cl-Guaiacol (1 : 3)	313.15	147.8	0	0.1689	0.657787	4.64384	4.37761	3.1353	2.64424	1.01244	0.9027	0.0033125	-5.2785	Testing	-5.39277	0.00474129	-0.249865
[Ach]Cl-Guaiacol (1 : 3)	313.15	235	0	0.1689	0.657787	4.64384	4.37761	3.1353	2.64424	1.01244	0.9027	0.0033125	-4.8159	Training	-4.8571	0.00470373	-0.480863
[Ach]Cl-Guaiacol (1 : 3)	313.15	338	0	0.1689	0.657787	4.64384	4.37761	3.1353	2.64424	1.01244	0.9027	0.0033125	-4.4482	Training	-4.44807	0.00467408	-0.350755
[Ach]Cl-Guaiacol (1 : 3)	313.15	434.5	0	0.1689	0.657787	4.64384	4.37761	3.1353	2.64424	1.01244	0.9027	0.0033125	-4.1997	Training	-4.20546	0.00466074	-0.45583
[Ach]Cl-Guaiacol (1 : 3)	313.15	535.3	0	0.1689	0.657787	4.64384	4.37761	3.1353	2.64424	1.01244	0.9027	0.0033125	-3.99	Testing	-4.02796	0.00466174	-0.706024
[Ach]Cl-Guaiacol (1 : 3)	323.15	55.9	0	0.1689	0.657787	4.64384	4.37761	3.1353	2.64424	1.01244	0.9027	0.0033125	-6.32	Training	-6.30031	0.00475834	-0.52653
[Ach]Cl-Guaiacol (1 : 3)	323.15	143.5	0	0.1689	0.657787	4.64384	4.37761	3.1353	2.64424	1.01244	0.9027	0.0033125	-5.3817	Training	-5.5552	0.00469805	0.125215
[Ach]Cl-Guaiacol (1 : 3)	323.15	239.4	0	0.1689	0.657787	4.64384	4.37761	3.1353	2.64424	1.01244	0.9027	0.0033125	-4.8929	Testing	-4.97616	0.00464526	-0.283492
[Ach]Cl-Guaiacol (1 : 3)	323.15	337.9	0	0.1689	0.657787	4.64384	4.37761	3.1353	2.64424	1.01244	0.9027	0.0033125	-4.5564	Testing	-4.59906	0.00460541	-0.196594
[Ach]Cl-Guaiacol (1 : 3)	323.15	438	0	0.1689	0.657787	4.64384	4.37761	3.1353	2.64424	1.01244	0.9027	0.0033125	-4.3051	Testing	-4.35783	0.00457984	-0.318449
[Ach]Cl-Guaiacol (1 : 3)	323.15	533	0	0.1689	0.657787	4.64384	4.37761	3.1353	2.64424	1.01244	0.9027	0.0033125	-4.1166	Testing	-4.19847	0.00456948	-0.549989
[Ach]Cl-Levulinic acid (1 : 3)	303.15	65.7	0	0	0.624975	5.95319	4.34622	1.0632	1.18995	2.34762	1.25962	0.0033125	-5.203	Testing	-5.32125	0.00532641	0.708623
[Ach]Cl-Levulinic acid (1 : 3)	303.15	120.4	0	0	0.624975	5.95319	4.34622	1.0632	1.18995	2.34762	1.25962	0.0033125	-4.6565	Training	-4.85642	0.00531174	1.07326
[Ach]Cl-Levulinic acid (1 : 3)	303.15	200	0	0	0.624975	5.95319	4.34622	1.0632	1.18995	2.34762	1.25962	0.0033125	-4.2131	Training	-4.32315	0.00529842	0.697943
[Ach]Cl-Levulinic acid (1 : 3)	303.15	283.4	0	0	0.624975	5.95319	4.34622	1.0632	1.18995	2.34762	1.25962	0.0033125	-3.868	Training	-3.92689	0.00529466	0.831386
[Ach]Cl-Levulinic acid (1 : 3)	303.15	388.3	0	0	0.624975	5.95319	4.34622	1.0632	1.18995	2.34762	1.25962	0.0033125	-3.572	Testing	-3.59107	0.00530476	0.727126
[Ach]Cl-Levulinic acid (1 : 3)	303.15	474.2	0	0	0.624975	5.95319	4.34622	1.0632	1.18995	2.34762	1.25962	0.0033125	-3.3873	Training	-3.39464	0.00532533	0.598485
[Ach]Cl-Levulinic acid (1 : 3)	303.15	542.7	0	0	0.624975	5.95319	4.34622	1.0632	1.18995	2.34762	1.25962	0.0033125	-3.2623	Training	-3.26571	0.00534967	0.402375
[Ach]Cl-Levulinic acid (1 : 3)	313.15	72.3	0	0	0.624975	5.95319	4.34622	1.0632	1.18995	2.34762	1.25962	0.0033125	-5.4037	Testing	-5.44136	0.00506783	0.628183
[Ach]Cl-Levulinic acid (1 : 3)	313.15	132.3	0	0	0.624975	5.95319	4.34622	1.0632	1.18995	2.34762	1.25962	0.0033125	-4.8796	Training	-4.95031	0.00504538	0.843455
[Ach]Cl-Levulinic acid (1 : 3)	313.15	215.1	0	0	0.624975	5.95319	4.34622	1.0632	1.18995	2.34762	1.25962	0.0033125	-4.3662	Testing	-4.43061	0.00502327	0.538224
[Ach]Cl-Levulinic acid (1 : 3)	313.15	315.4	0	0	0.624975	5.95319	4.34622	1.0632	1.18995	2.34762	1.25962	0.0033125	-4.0174	Training	-4.00635	0.00501028	0.690446
[Ach]Cl-Levulinic acid (1 : 3)	313.15	410.2	0	0	0.624975	5.95319	4.34622	1.0632	1.18995	2.34762	1.25962	0.0033125	-3.7942	Training	-3.73991	0.00501188	0.537752
[Ach]Cl-Levulinic acid (1 : 3)	313.15	511.8	0	0	0.624975	5.95319	4.34622	1.0632	1.18995	2.34762	1.25962	0.0033125	-3.5791	Testing	-3.533	0.00502857	0.274948
[Ach]Cl-Levulinic acid (1 : 3)	313.15	570.1	0	0	0.624975	5.95319	4.34622	1.0632	1.18995	2.34762	1.25962	0.0033125	-3.4738	Training	-3.43452	0.00504515	0.147622
[Ach]Cl-Levulinic acid (1 : 3)	323.15	77.5	0	0	0.624975	5.95319	4.34622	1.0632	1.18995	2.34762	1.25962	0.0033125	-5.655	Training	-5.57666	0.00499583	0.500756
[Ach]Cl-Levulinic acid (1 : 3)	323.15	129.9	0	0	0.624975	5.95319	4.34622	1.0632	1.18995	2.34762	1.25962	0.0033125	-5.1499	Training	-5.15321	0.00497005	0.757812
[Ach]Cl-Levulinic acid (1 : 3)	323.15	220.1	0	0	0.624975	5.95319	4.34622	1.0632	1.18995	2.34762	1.25962	0.0033125	-4.6356	Training	-4.59604	0.00493534	0.360542
[Ach]Cl-Levulinic acid (1 : 3)	323.15	317.1	0	0	0.624975	5.95319	4.34622	1.0632	1.18995	2.34762	1.25962	0.0033125	-4.2759	Training	-4.19859	0.00491164	0.509028
[Ach]Cl-Levulinic acid (1 : 3)	323.15	414.7	0	0	0.624975	5.95319	4.34622	1.0632	1.18995	2.34762	1.25962	0.0033125	-4.0118	Testing	-3.9341	0.00490204	0.388517
[Ach]Cl-Levulinic acid (1 : 3)	323.15	512.3	0	0	0.624975	5.95319	4.34622	1.0632	1.18995	2.34762	1.25962	0.0033125	-3.8122	Training	-3.74405	0.00490674	0.204351
[Ach]Cl-Levulinic acid (1 : 3)	323.15	576.4	0	0	0.624975	5.95319	4.34622	1.0632	1.18995	2.34762	1.25962	0.0033125	-3.6929	Testing	-3.64155	0.00491761	-0.0101005
[Ach]Cl-Levulinic acid (1 : 3)	333.15	83	0	0	0.624975	5.95319	4.34622	1.0632	1.18995	2.34762	1.25962	0.0033125	-5.684	Training	-5.69851	0.00510979	0.84435
[Ach]Cl-Levulinic acid (1 : 3)	333.15	133.5	0	0	0.624975	5.95319	4.34622	1.0632	1.18995	2.34762	1.25962	0.0033125	-5.24	Training	-5.29968	0.00507924	0.990924
[Ach]Cl-Levulinic acid (1 : 3)	333.15	223.6	0	0	0.624975	5.95319	4.34622	1.0632	1.18995	2.34762	1.25962	0.0033125	-4.7795	Training	-4.757	0.00503425	0.468237
[Ach]Cl-Levulinic acid (1 : 3)	333.15	320.6	0	0	0.624975	5.95319	4.34622	1.0632	1.18995	2.34762	1.25962	0.0033125	-4.4482	Testing	-4.37181	0.00499943	0.472399
[Ach]Cl-Levulinic acid (1 : 3)	333.15	415.2	0	0	0.624975	5.95319	4.34622	1.0632	1.18995	2.34762	1.25962	0.0033125	-4.1997	Testing	-4.12368	0.00497908	0.382755
[Ach]Cl-Levulinic acid (1 : 3)	333.15	513.3	0	0	0.624975	5.95319	4.34622	1.0632	1.18995	2.34762	1.25962	0.0033125	-3.9954	Testing	-3.93985	0.00497216	0.166027
[Ach]Cl-Levulinic acid (1 : 3)	333.15	571.6	0	0	0.624975	5.95319	4.34622	1.0632	1.18995	2.34762	1.25962	0.0033125	-3.8971	Testing	-3.8507	0.00497489	-0.0163516
[TEA]Cl-Levulinic acid (1 : 3)	303.15	66.1	0	0	0.300737	6.03329	4.58603	1.33674	0.990463	1.96768	1.29779	0.0688625	-5.4262	Testing	-5.42607	0.0048313	0.125378
[TEA]Cl-Levulinic acid (1 : 3)	303.15	125.6	0	0	0.300737	6.03329	4.58603	1.33674	0.990463	1.96768	1.29779	0.0688625	-4.8036	Training	-4.91885	0.0048377	0.572422
[TEA]Cl-Levulinic acid (1 : 3)	303.15	211.6	0	0	0.300737	6.03329	4.58603	1.33674	0.990463	1.96768	1.29779	0.0688625	-4.2904	Training	-4.35194	0.00485634	0.284987
[TEA]Cl-Levulinic acid (1 : 3)	303.15	302.8	0	0	0.300737	6.03329	4.58603	1.33674	0.990463	1.96768	1.29779	0.0688625	-3.9686	Testing	-3.93968	0.00488824	0.347657
[TEA]Cl-Levulinic acid (1 : 3)	303.15	404.1	0	0	0.300737	6.03329	4.58603	1.33674	0.990463	1.96768	1.29779	0.0688625	-3.6969	Training	-3.63452	0.00493831	0.30659
[TEA]Cl-Levulinic acid (1 : 3)	303.15	500.2	0	0	0.300737	6.03329	4.58603	1.33674	0.990463	1.96768	1.29779	0.0688625	-3.49	Testing	-3.42832	0.00500004	0.0680163
[TEA]Cl-Levulinic acid (1 : 3)	303.15	561.6	0	0	0.300737	6.03329	4.58603	1.33674	0.990463	1.96768	1.29779	0.0688625	-3.3814	Testing	-3.31978	0.00504674	-0.1123
[TEA]Cl-Levulinic acid (1 : 3)	313.15	77.6	0	0	0.300737	6.03329	4.58603	1.33674	0.990463	1.96768	1.29779	0.0688625	-5.5728	Training	-5.48809	0.00499765	0.12276
[TEA]Cl-Levulinic acid (1 : 3)	313.15	131.8	0	0	0.300737	6.03329	4.58603	1.33674	0.990463	1.96768	1.29779	0.0688625	-5.036	Training	-5.04292	0.00499771	0.422574
[TEA]Cl-Levulinic acid (1 : 3)	313.15	219.8	0	0	0.300737	6.03329	4.58603	1.33674	0.990463	1.96768	1.29779	0.0688625	-4.5469	Testing	-4.48656	0.00500718	0.024505
[TEA]Cl-Levulinic acid (1 : 3)	313.15	316.9	0	0	0.300737	6.03329	4.58603	1.33674	0.990463	1.96768	1.29779	0.0688625	-4.1734	Testing	-4.0757	0.00503113	0.207021
[TEA]Cl-Levulinic acid (1 : 3)	313.15	416.9	0	0	0.300737	6.03329	4.58603	1.33674	0.990463	1.96768	1.29779	0.0688625	-3.8971	Testing	-3.79708	0.00507059	0.14382
[TEA]Cl-Levulinic acid (1 : 3)	313.15	516.4	0	0	0.300737	6.03329	4.58603	1.33674	0.990463	1.96768	1.29779	0.0688625	-3.677	Training	-3.59899	0.00512475	-0.0104112
[TEA]Cl-Levulinic acid (1 : 3)	313.15	581.3	0	0	0.300737	6.03329	4.58603	1.33674	0.990463	1.96768	1.29779	0.0688625	-3.5614	Testing	-3.49271	0.00516808	-0.234854
[TEA]Cl-Levulinic acid (1 : 3)	323.15	78	0	0	0.300737	6.03329	4.58603	1.33674	0.990463	1.96768	1.29779	0.0688625	-5.655	Training	-5.66213	0.00535048	0.431784
[TEA]Cl-Levulinic acid (1 : 3)	323.15	144.1	0	0	0.300737	6.03329	4.58603	1.33674	0.990463	1.96768	1.29779	0.0688625	-5.0672	Training	-5.13522	0.00534325	0.639344
[TEA]Cl-Levulinic acid (1 : 3)	323.15	229.1	0	0	0.300737	6.03329	4.58603	1.33674	0.990463	1.96768	1.29779	0.0688625	-4.6052	Training	-4.62733	0.0053436	0.299032
[TEA]Cl-Levulinic acid (1 : 3)	323.15	325.9	0	0	0.300737	6.03329	4.58603	1.33674	0.990463	1.96768	1.29779	0.0688625	-4.2616	Training	-4.24031	0.0053572	0.416659
[TEA]Cl-Levulinic acid (1 : 3)	323.15	421.6	0	0	0.300737	6.03329	4.58603	1.33674	0.990463	1.96768	1.29779	0.0688625	-4.0118	Training	-3.98663	0.00538447	0.320399
[TEA]Cl-Levulinic acid (1 : 3)	323.15	526	0	0	0.300737	6.03329	4.58603	1.33674	0.990463	1.96768	1.29779	0.0688625	-3.8032	Training	-3.78888	0.00542991	0.0642804
[TEA]Cl-Levulinic acid (1 : 3)	323.15	585.4	0	0	0.300737	6.03329	4.58603	1.33674	0.990463	1.96768	1.29779	0.0688625	-3.6969	Training	-3.69646	0.00546306	-0.110728
[TEA]Cl-Levulinic acid (1 : 3)	333.15	84	0	0	0.300737	6.03329	4.58603	1.33674	0.990463	1.96768	1.29779	0.0688625	-5.8781	Training	-5.78402	0.00588903	0.307503
[TEA]Cl-Levulinic acid (1 : 3)	333.15	140.7	0	0	0.300737	6.03329	4.58603	1.33674	0.990463	1.96768	1.29779	0.0688625	-5.2983	Testing	-5.33663	0.00587614	0.615308
[TEA]Cl-Levulinic acid (1 : 3)	333.15	228.8	0	0	0.300737	6.03329	4.58603	1.33674	0.990463	1.96768	1.29779	0.0688625	-4.7795	Training	-4.8101	0.0058657	0.331053
[TEA]Cl-Levulinic acid (1 : 3)	333.15	331.2	0	0	0.300737	6.03329	4.58603	1.33674	0.990463	1.96768	1.29779	0.0688625	-4.4063	Training	-4.40915	0.0058682	0.478472
[TEA]Cl-Levulinic acid (1 : 3)	333.15	429.2	0	0	0.300737	6.03329	4.58603	1.33674	0.990463	1.96768	1.29779	0.0688625	-4.1541	Testing	-4.15953	0.00588534	0.328162
[TEA]Cl-Levulinic acid (1 : 3)	333.15	529.2	0	0	0.300737	6.03329	4.58603	1.33674	0.990463	1.96768	1.29779	0.0688625	-3.9373	Testing	-3.97709	0.00591768	0.127039
[TEA]Cl-Levulinic acid (1 : 3)	333.15	583.3	0	0	0.300737	6.03329	4.58603	1.33674	0.990463	1.96768	1.29779	0.0688625	-3.8351	Testing	-3.89534	0.00594144	-0.016745
[TEA]Br-Levulinic acid (1 : 3)	303.15	68.7	0	0	0.31945	6.00949	4.68414	1.20575	1.01361	2.09346	1.35888	0	-5.4968	Training	-5.49365	0.00420931	-0.0524692
[TEA]Br-Levulinic acid (1 : 3)	303.15	122.4	0	0	0.31945	6.00949	4.68414	1.20575	1.01361	2.09346	1.35888	0	-4.9199	Testing	-5.04424	0.00420227	0.308282
[TEA]Br-Levulinic acid (1 : 3)	303.15	210.3	0	0	0.31945	6.00949	4.68414	1.20575	1.01361	2.09346	1.35888	0	-4.4063	Training	-4.47512	0.00420008	0.0166516
[TEA]Br-Levulinic acid (1 : 3)	303.15	305.1	0	0	0.31945	6.00949	4.68414	1.20575	1.01361	2.09346	1.35888	0	-4.0342	Training	-4.05522	0.00421073	0.216019
[TEA]Br-Levulinic acid (1 : 3)	303.15	402.4	0	0	0.31945	6.00949	4.68414	1.20575	1.01361	2.09346	1.35888	0	-3.7636	Testing	-3.76112	0.00423568	0.118437
[TEA]Br-Levulinic acid (1 : 3)	303.15	500.5	0	0	0.31945	6.00949	4.68414	1.20575	1.01361	2.09346	1.35888	0	-3.5474	Training	-3.54392	0.00427522	-0.0354752
[TEA]Br-Levulinic acid (1 : 3)	303.15	564.4	0	0	0.31945	6.00949	4.68414	1.20575	1.01361	2.09346	1.35888	0	-3.4296	Training	-3.4271	0.00430875	-0.215592
[TEA]Br-Levulinic acid (1 : 3)	313.15	84.2	0	0	0.31945	6.00949	4.68414	1.20575	1.01361	2.09346	1.35888	0	-5.3817	Training	-5.49962	0.00415265	0.45298
[TEA]Br-Levulinic acid (1 : 3)	313.15	139.1	0	0	0.31945	6.00949	4.68414	1.20575	1.01361	2.09346	1.35888	0	-4.9477	Testing	-5.06841	0.0041402	0.451527
[TEA]Br-Levulinic acid (1 : 3)	313.15	230.1	0	0	0.31945	6.00949	4.68414	1.20575	1.01361	2.09346	1.35888	0	-4.4741	Training	-4.52831	0.00412952	0.156214
[TEA]Br-Levulinic acid (1 : 3)	313.15	329.1	0	0	0.31945	6.00949	4.68414	1.20575	1.01361	2.09346	1.35888	0	-4.1289	Testing	-4.13596	0.00413203	0.220767
[TEA]Br-Levulinic acid (1 : 3)	313.15	428.9	0	0	0.31945	6.00949	4.68414	1.20575	1.01361	2.09346	1.35888	0	-3.8776	Testing	-3.86838	0.00414944	0.101022
[TEA]Br-Levulinic acid (1 : 3)	313.15	525.9	0	0	0.31945	6.00949	4.68414	1.20575	1.01361	2.09346	1.35888	0	-3.6889	Training	-3.67616	0.0041807	-0.110364
[TEA]Br-Levulinic acid (1 : 3)	313.15	587.7	0	0	0.31945	6.00949	4.68414	1.20575	1.01361	2.09346	1.35888	0	-3.5791	Testing	-3.57395	0.00420797	-0.324476
[TEA]Br-Levulinic acid (1 : 3)	323.15	83.1	0	0	0.31945	6.00949	4.68414	1.20575	1.01361	2.09346	1.35888	0	-5.7138	Training	-5.65465	0.00428626	0.197966
[TEA]Br-Levulinic acid (1 : 3)	323.15	138.5	0	0	0.31945	6.00949	4.68414	1.20575	1.01361	2.09346	1.35888	0	-5.203	Training	-5.22251	0.00426698	0.414842
[TEA]Br-Levulinic acid (1 : 3)	323.15	236.2	0	0	0.31945	6.00949	4.68414	1.20575	1.01361	2.09346	1.35888	0	-4.667	Testing	-4.65662	0.00424421	0.0604625
[TEA]Br-Levulinic acid (1 : 3)	323.15	323.8	0	0	0.31945	6.00949	4.68414	1.20575	1.01361	2.09346	1.35888	0	-4.3505	Training	-4.31768	0.00423598	0.217905
[TEA]Br-Levulinic acid (1 : 3)	323.15	423.9	0	0	0.31945	6.00949	4.68414	1.20575	1.01361	2.09346	1.35888	0	-4.0804	Training	-4.05248	0.00424068	0.138062
[TEA]Br-Levulinic acid (1 : 3)	323.15	528.3	0	0	0.31945	6.00949	4.68414	1.20575	1.01361	2.09346	1.35888	0	-3.8728	Training	-3.85359	0.0042616	-0.120421
[TEA]Br-Levulinic acid (1 : 3)	323.15	578.8	0	0	0.31945	6.00949	4.68414	1.20575	1.01361	2.09346	1.35888	0	-3.7723	Training	-3.77403	0.00427759	-0.245263
[TEA]Br-Levulinic acid (1 : 3)	333.15	81.8	0	0	0.31945	6.00949	4.68414	1.20575	1.01361	2.09346	1.35888	0	-5.8091	Training	-5.79927	0.00460759	0.506422
[TEA]Br-Levulinic acid (1 : 3)	333.15	141	0	0	0.31945	6.00949	4.68414	1.20575	1.01361	2.09346	1.35888	0	-5.2785	Testing	-5.34249	0.00457995	0.652441
[TEA]Br-Levulinic acid (1 : 3)	333.15	233.4	0	0	0.31945	6.00949	4.68414	1.20575	1.01361	2.09346	1.35888	0	-4.7915	Training	-4.81367	0.00454732	0.266033
[TEA]Br-Levulinic acid (1 : 3)	333.15	327.9	0	0	0.31945	6.00949	4.68414	1.20575	1.01361	2.09346	1.35888	0	-4.4741	Testing	-4.45527	0.00452721	0.295655
[TEA]Br-Levulinic acid (1 : 3)	333.15	429.6	0	0	0.31945	6.00949	4.68414	1.20575	1.01361	2.09346	1.35888	0	-4.1931	Training	-4.19791	0.00452054	0.272665
[TEA]Br-Levulinic acid (1 : 3)	333.15	529.4	0	0	0.31945	6.00949	4.68414	1.20575	1.01361	2.09346	1.35888	0	-3.99	Testing	-4.01714	0.00452909	-8.68017e-05
[TEA]Br-Levulinic acid (1 : 3)	333.15	587.8	0	0	0.31945	6.00949	4.68414	1.20575	1.01361	2.09346	1.35888	0	-3.8971	Training	-3.93056	0.00454103	-0.162955
[TBA]Cl-Levulinic acid (1 : 3)	303.15	63.2	0	0	0.287762	5.39606	7.16427	3.00779	0.9866	1.98286	1.1755	0.075675	-5.24	Training	-5.13577	0.00494872	0.15942
[TBA]Cl-Levulinic acid (1 : 3)	303.15	118.8	0	0	0.287762	5.39606	7.16427	3.00779	0.9866	1.98286	1.1755	0.075675	-4.6152	Testing	-4.65999	0.00496714	0.593731
[TBA]Cl-Levulinic acid (1 : 3)	303.15	200.6	0	0	0.287762	5.39606	7.16427	3.00779	0.9866	1.98286	1.1755	0.075675	-4.1166	Training	-4.10968	0.00500267	0.358111
[TBA]Cl-Levulinic acid (1 : 3)	303.15	293	0	0	0.287762	5.39606	7.16427	3.00779	0.9866	1.98286	1.1755	0.075675	-3.7297	Training	-3.67973	0.00505489	0.486007
[TBA]Cl-Levulinic acid (1 : 3)	303.15	389.8	0	0	0.287762	5.39606	7.16427	3.00779	0.9866	1.98286	1.1755	0.075675	-3.4483	Testing	-3.3791	0.00512334	0.411679
[TBA]Cl-Levulinic acid (1 : 3)	303.15	494.3	0	0	0.287762	5.39606	7.16427	3.00779	0.9866	1.98286	1.1755	0.075675	-3.2164	Training	-3.15092	0.00521302	0.254822
[TBA]Cl-Levulinic acid (1 : 3)	303.15	559.1	0	0	0.287762	5.39606	7.16427	3.00779	0.9866	1.98286	1.1755	0.075675	-3.0944	Testing	-3.03649	0.00527687	0.040713
[TBA]Cl-Levulinic acid (1 : 3)	313.15	69.7	0	0	0.287762	5.39606	7.16427	3.00779	0.9866	1.98286	1.1755	0.075675	-5.1328	Training	-5.2607	0.00461466	0.807162
[TBA]Cl-Levulinic acid (1 : 3)	313.15	127.3	0	0	0.287762	5.39606	7.16427	3.00779	0.9866	1.98286	1.1755	0.075675	-4.6052	Training	-4.78354	0.00462749	1.02441
[TBA]Cl-Levulinic acid (1 : 3)	313.15	210.9	0	0	0.287762	5.39606	7.16427	3.00779	0.9866	1.98286	1.1755	0.075675	-4.1605	Testing	-4.24829	0.00465496	0.533302
[TBA]Cl-Levulinic acid (1 : 3)	313.15	310	0	0	0.287762	5.39606	7.16427	3.00779	0.9866	1.98286	1.1755	0.075675	-3.8167	Training	-3.82091	0.00470112	0.60027
[TBA]Cl-Levulinic acid (1 : 3)	313.15	409.1	0	0	0.287762	5.39606	7.16427	3.00779	0.9866	1.98286	1.1755	0.075675	-3.5474	Training	-3.54117	0.00476202	0.525712
[TBA]Cl-Levulinic acid (1 : 3)	313.15	509.6	0	0	0.287762	5.39606	7.16427	3.00779	0.9866	1.98286	1.1755	0.075675	-3.3382	Testing	-3.33941	0.00483883	0.257209
[TBA]Cl-Levulinic acid (1 : 3)	313.15	578.6	0	0	0.287762	5.39606	7.16427	3.00779	0.9866	1.98286	1.1755	0.075675	-3.2114	Training	-3.22641	0.00490035	0.103562
[TBA]Cl-Levulinic acid (1 : 3)	323.15	79.1	0	0	0.287762	5.39606	7.16427	3.00779	0.9866	1.98286	1.1755	0.075675	-5.3817	Training	-5.36332	0.00446668	0.561067
[TBA]Cl-Levulinic acid (1 : 3)	323.15	131.6	0	0	0.287762	5.39606	7.16427	3.00779	0.9866	1.98286	1.1755	0.075675	-4.9063	Testing	-4.94084	0.00447261	0.695542
[TBA]Cl-Levulinic acid (1 : 3)	323.15	229.6	0	0	0.287762	5.39606	7.16427	3.00779	0.9866	1.98286	1.1755	0.075675	-4.3428	Testing	-4.34736	0.00449477	0.332115
[TBA]Cl-Levulinic acid (1 : 3)	323.15	323.4	0	0	0.287762	5.39606	7.16427	3.00779	0.9866	1.98286	1.1755	0.075675	-3.9954	Testing	-3.97588	0.00452947	0.477352
[TBA]Cl-Levulinic acid (1 : 3)	323.15	424.2	0	0	0.287762	5.39606	7.16427	3.00779	0.9866	1.98286	1.1755	0.075675	-3.7255	Testing	-3.71138	0.00458149	0.393686
[TBA]Cl-Levulinic acid (1 : 3)	323.15	524.4	0	0	0.287762	5.39606	7.16427	3.00779	0.9866	1.98286	1.1755	0.075675	-3.5166	Training	-3.52325	0.00464832	0.212951
[TBA]Cl-Levulinic acid (1 : 3)	323.15	591.6	0	0	0.287762	5.39606	7.16427	3.00779	0.9866	1.98286	1.1755	0.075675	-3.3962	Testing	-3.41947	0.00470158	-0.0209333
[TBA]Cl-Levulinic acid (1 : 3)	333.15	85	0	0	0.287762	5.39606	7.16427	3.00779	0.9866	1.98286	1.1755	0.075675	-5.5215	Training	-5.48766	0.00450405	0.63553
[TBA]Cl-Levulinic acid (1 : 3)	333.15	144.5	0	0	0.287762	5.39606	7.16427	3.00779	0.9866	1.98286	1.1755	0.075675	-4.9762	Testing	-5.02552	0.00450449	0.80783
[TBA]Cl-Levulinic acid (1 : 3)	333.15	236.5	0	0	0.287762	5.39606	7.16427	3.00779	0.9866	1.98286	1.1755	0.075675	-4.4918	Training	-4.49392	0.00451563	0.415573
[TBA]Cl-Levulinic acid (1 : 3)	333.15	335.5	0	0	0.287762	5.39606	7.16427	3.00779	0.9866	1.98286	1.1755	0.075675	-4.1477	Training	-4.12001	0.00454181	0.518591
[TBA]Cl-Levulinic acid (1 : 3)	333.15	431.7	0	0	0.287762	5.39606	7.16427	3.00779	0.9866	1.98286	1.1755	0.075675	-3.8922	Training	-3.87909	0.00458134	0.43222
[TBA]Cl-Levulinic acid (1 : 3)	333.15	533	0	0	0.287762	5.39606	7.16427	3.00779	0.9866	1.98286	1.1755	0.075675	-3.6652	Training	-3.69536	0.00463798	0.241857
[TBA]Cl-Levulinic acid (1 : 3)	333.15	589.8	0	0	0.287762	5.39606	7.16427	3.00779	0.9866	1.98286	1.1755	0.075675	-3.5649	Testing	-3.60982	0.00467648	0.0339951
[TBA]Br-Levulinic acid (1 : 3)	303.15	70.2	0	0	0.316125	5.5511	7.22032	2.88835	1.00378	2.09179	1.31333	0.0019875	-5.185	Training	-5.13261	0.00502907	0.211286
[TBA]Br-Levulinic acid (1 : 3)	303.15	122.9	0	0	0.316125	5.5511	7.22032	2.88835	1.00378	2.09179	1.31333	0.0019875	-4.6052	Training	-4.69582	0.00502858	0.639598
[TBA]Br-Levulinic acid (1 : 3)	303.15	206.2	0	0	0.316125	5.5511	7.22032	2.88835	1.00378	2.09179	1.31333	0.0019875	-4.1166	Testing	-4.15722	0.00503632	0.26306
[TBA]Br-Levulinic acid (1 : 3)	303.15	301.7	0	0	0.316125	5.5511	7.22032	2.88835	1.00378	2.09179	1.31333	0.0019875	-3.7508	Testing	-3.73067	0.00505801	0.375833
[TBA]Br-Levulinic acid (1 : 3)	303.15	401.5	0	0	0.316125	5.5511	7.22032	2.88835	1.00378	2.09179	1.31333	0.0019875	-3.4705	Training	-3.42765	0.00509531	0.366431
[TBA]Br-Levulinic acid (1 : 3)	303.15	500.4	0	0	0.316125	5.5511	7.22032	2.88835	1.00378	2.09179	1.31333	0.0019875	-3.2623	Training	-3.2081	0.00514701	0.148843
[TBA]Br-Levulinic acid (1 : 3)	303.15	568.2	0	0	0.316125	5.5511	7.22032	2.88835	1.00378	2.09179	1.31333	0.0019875	-3.1419	Training	-3.08398	0.00519094	-0.0531189
[TBA]Br-Levulinic acid (1 : 3)	313.15	82.6	0	0	0.316125	5.5511	7.22032	2.88835	1.00378	2.09179	1.31333	0.0019875	-5.203	Testing	-5.19561	0.00458746	0.412571
[TBA]Br-Levulinic acid (1 : 3)	313.15	198	0	0	0.316125	5.5511	7.22032	2.88835	1.00378	2.09179	1.31333	0.0019875	-4.3275	Testing	-4.38398	0.00458015	0.41849
[TBA]Br-Levulinic acid (1 : 3)	313.15	290.6	0	0	0.316125	5.5511	7.22032	2.88835	1.00378	2.09179	1.31333	0.0019875	-3.9477	Testing	-3.96094	0.00458874	0.430835
[TBA]Br-Levulinic acid (1 : 3)	313.15	400.4	0	0	0.316125	5.5511	7.22032	2.88835	1.00378	2.09179	1.31333	0.0019875	-3.6306	Testing	-3.62864	0.00461561	0.393249
[TBA]Br-Levulinic acid (1 : 3)	313.15	499.9	0	0	0.316125	5.5511	7.22032	2.88835	1.00378	2.09179	1.31333	0.0019875	-3.4112	Training	-3.41627	0.00465559	0.242355
[TBA]Br-Levulinic acid (1 : 3)	313.15	568.4	0	0	0.316125	5.5511	7.22032	2.88835	1.00378	2.09179	1.31333	0.0019875	-3.2914	Testing	-3.29743	0.00469174	-0.00264414
[TBA]Br-Levulinic acid (1 : 3)	323.15	101.1	0	0	0.316125	5.5511	7.22032	2.88835	1.00378	2.09179	1.31333	0.0019875	-5.185	Training	-5.19812	0.00432897	0.679685
[TBA]Br-Levulinic acid (1 : 3)	323.15	201.4	0	0	0.316125	5.5511	7.22032	2.88835	1.00378	2.09179	1.31333	0.0019875	-4.5659	Training	-4.52944	0.00431225	0.34956
[TBA]Br-Levulinic acid (1 : 3)	323.15	306.9	0	0	0.316125	5.5511	7.22032	2.88835	1.00378	2.09179	1.31333	0.0019875	-4.1105	Testing	-4.07428	0.00431095	0.372075
[TBA]Br-Levulinic acid (1 : 3)	323.15	402.3	0	0	0.316125	5.5511	7.22032	2.88835	1.00378	2.09179	1.31333	0.0019875	-3.8304	Training	-3.80346	0.00432416	0.393706
[TBA]Br-Levulinic acid (1 : 3)	323.15	502.9	0	0	0.316125	5.5511	7.22032	2.88835	1.00378	2.09179	1.31333	0.0019875	-3.6009	Training	-3.59853	0.00435289	0.214278
[TBA]Br-Levulinic acid (1 : 3)	323.15	566.6	0	0	0.316125	5.5511	7.22032	2.88835	1.00378	2.09179	1.31333	0.0019875	-3.4835	Testing	-3.49378	0.00437894	-0.0019573
[TBA]Br-Levulinic acid (1 : 3)	333.15	85.3	0	0	0.316125	5.5511	7.22032	2.88835	1.00378	2.09179	1.31333	0.0019875	-5.5728	Testing	-5.45689	0.00426626	0.509055
[TBA]Br-Levulinic acid (1 : 3)	333.15	142.3	0	0	0.316125	5.5511	7.22032	2.88835	1.00378	2.09179	1.31333	0.0019875	-5.036	Testing	-5.02314	0.00424672	0.753888
[TBA]Br-Levulinic acid (1 : 3)	333.15	230.7	0	0	0.316125	5.5511	7.22032	2.88835	1.00378	2.09179	1.31333	0.0019875	-4.519	Training	-4.51906	0.00422606	0.446934
[TBA]Br-Levulinic acid (1 : 3)	333.15	326	0	0	0.316125	5.5511	7.22032	2.88835	1.00378	2.09179	1.31333	0.0019875	-4.1799	Testing	-4.15556	0.00421693	0.510116
[TBA]Br-Levulinic acid (1 : 3)	333.15	423.2	0	0	0.316125	5.5511	7.22032	2.88835	1.00378	2.09179	1.31333	0.0019875	-3.912	Training	-3.90602	0.00422166	0.492744
[TBA]Br-Levulinic acid (1 : 3)	333.15	523.5	0	0	0.316125	5.5511	7.22032	2.88835	1.00378	2.09179	1.31333	0.0019875	-3.6969	Training	-3.72059	0.00424141	0.281422
[TBA]Br-Levulinic acid (1 : 3)	333.15	586.4	0	0	0.316125	5.5511	7.22032	2.88835	1.00378	2.09179	1.31333	0.0019875	-3.5863	Training	-3.62625	0.0042615	0.0914592
[Ch]Cl-Phenol (1 : 3)	313.15	2100	0.036225	0.414787	0.626363	3.78293	2.69851	2.7256	2.34468	0.863738	0.9254	0.00095	-2.443	Testing	-2.52316	0.00386501	0.0542323
[Ch]Cl-Phenol (1 : 3)	313.15	3660	0.036225	0.414787	0.626363	3.78293	2.69851	2.7256	2.34468	0.863738	0.9254	0.00095	-1.987	Testing	-2.089	0.00864343	-0.108437
[TMA]Cl-Phenol (1 : 3)	313.15	2360	0.036225	0.414787	0.47945	3.45395	2.95728	2.72925	2.19981	0.628387	0.920588	0.008	-2.3592	Testing	-2.53758	0.00502319	-0.0184488
[TMA]Cl-Phenol (1 : 3)	313.15	4470	0.036225	0.414787	0.47945	3.45395	2.95728	2.72925	2.19981	0.628387	0.920588	0.008	-1.974	Training	-2.09425	0.0129831	-0.754121
[TEA]Cl-Phenol (1 : 3)	313.15	2120	0.036225	0.414787	0.301413	3.95234	3.63	3.14709	2.19526	0.598888	0.937037	0.0688625	-2.5956	Training	-2.53217	0.00737326	-0.520283
[TEA]Cl-Phenol (1 : 3)	313.15	3410	0.036225	0.414787	0.301413	3.95234	3.63	3.14709	2.19526	0.598888	0.937037	0.0688625	-2.1681	Training	-2.17686	0.0116311	-0.53827
[TBA]Br-Hexanoic acid (1 : 3)	303.15	556	0.0399	0.38655	0.3465	2.4863	10.1712	5.21582	0.883025	1.47907	1.044	0.0019875	-2.8525	Training	-2.88647	0.00397544	0.453636
[TBA]Br-Hexanoic acid (1 : 3)	303.15	650	0.0399	0.38655	0.3465	2.4863	10.1712	5.21582	0.883025	1.47907	1.044	0.0019875	-2.6956	Training	-2.73895	0.00393476	0.149923
[TBA]Br-Hexanoic acid (1 : 3)	303.15	747	0.0399	0.38655	0.3465	2.4863	10.1712	5.21582	0.883025	1.47907	1.044	0.0019875	-2.5485	Testing	-2.60765	0.00390669	-0.230526
[TBA]Br-Hexanoic acid (1 : 3)	303.15	910	0.0399	0.38655	0.3465	2.4863	10.1712	5.21582	0.883025	1.47907	1.044	0.0019875	-2.3709	Training	-2.42069	0.00389132	-0.320969
[TBA]Br-Hexanoic acid (1 : 3)	303.15	987	0.0399	0.38655	0.3465	2.4863	10.1712	5.21582	0.883025	1.47907	1.044	0.0019875	-2.2916	Training	-2.34369	0.00389794	-0.194878
[TBA]Br-Hexanoic acid (1 : 3)	303.15	1090	0.0399	0.38655	0.3465	2.4863	10.1712	5.21582	0.883025	1.47907	1.044	0.0019875	-2.1821	Training	-2.24974	0.00392069	-0.0181173
[TBA]Br-Hexanoic acid (1 : 3)	303.15	1183	0.0399	0.38655	0.3465	2.4863	10.1712	5.21582	0.883025	1.47907	1.044	0.0019875	-2.1136	Training	-2.17238	0.00395492	0.0696777
[TBA]Br-Hexanoic acid (1 : 3)	313.15	466	0.0399	0.38655	0.3465	2.4863	10.1712	5.21582	0.883025	1.47907	1.044	0.0019875	-3.2365	Training	-3.20174	0.00401114	0.633664
[TBA]Br-Hexanoic acid (1 : 3)	313.15	580	0.0399	0.38655	0.3465	2.4863	10.1712	5.21582	0.883025	1.47907	1.044	0.0019875	-2.9858	Testing	-2.99617	0.00393445	0.364244
[TBA]Br-Hexanoic acid (1 : 3)	313.15	688	0.0399	0.38655	0.3465	2.4863	10.1712	5.21582	0.883025	1.47907	1.044	0.0019875	-2.8753	Testing	-2.83765	0.00387979	-0.139577
[TBA]Br-Hexanoic acid (1 : 3)	313.15	838	0.0399	0.38655	0.3465	2.4863	10.1712	5.21582	0.883025	1.47907	1.044	0.0019875	-2.6409	Training	-2.65357	0.00383293	-0.628136
[TBA]Br-Hexanoic acid (1 : 3)	313.15	946	0.0399	0.38655	0.3465	2.4863	10.1712	5.21582	0.883025	1.47907	1.044	0.0019875	-2.5307	Training	-2.53928	0.0038201	-0.478048
[TBA]Br-Hexanoic acid (1 : 3)	313.15	1044	0.0399	0.38655	0.3465	2.4863	10.1712	5.21582	0.883025	1.47907	1.044	0.0019875	-2.4453	Testing	-2.44558	0.00382361	-0.383258
[TBA]Br-Hexanoic acid (1 : 3)	313.15	1146	0.0399	0.38655	0.3465	2.4863	10.1712	5.21582	0.883025	1.47907	1.044	0.0019875	-2.357	Testing	-2.35619	0.00384257	-0.258326
[TBA]Br-Hexanoic acid (1 : 3)	323.15	502	0.0399	0.38655	0.3465	2.4863	10.1712	5.21582	0.883025	1.47907	1.044	0.0019875	-3.3668	Testing	-3.32692	0.00415218	0.463254
[TBA]Br-Hexanoic acid (1 : 3)	323.15	644	0.0399	0.38655	0.3465	2.4863	10.1712	5.21582	0.883025	1.47907	1.044	0.0019875	-3.1442	Testing	-3.09739	0.00405029	-0.0199657
[TBA]Br-Hexanoic acid (1 : 3)	323.15	748	0.0399	0.38655	0.3465	2.4863	10.1712	5.21582	0.883025	1.47907	1.044	0.0019875	-2.9151	Testing	-2.95944	0.00399488	-0.220724
[TBA]Br-Hexanoic acid (1 : 3)	323.15	861	0.0399	0.38655	0.3465	2.4863	10.1712	5.21582	0.883025	1.47907	1.044	0.0019875	-2.8117	Training	-2.82805	0.00395307	-0.755076
[TBA]Br-Hexanoic acid (1 : 3)	323.15	977	0.0399	0.38655	0.3465	2.4863	10.1712	5.21582	0.883025	1.47907	1.044	0.0019875	-2.6708	Training	-2.70785	0.00393009	-0.58456
[TBA]Br-Hexanoic acid (1 : 3)	323.15	1083	0.0399	0.38655	0.3465	2.4863	10.1712	5.21582	0.883025	1.47907	1.044	0.0019875	-2.6255	Training	-2.60792	0.00392675	-0.561987
[TBA]Br-Hexanoic acid (1 : 3)	323.15	1112	0.0399	0.38655	0.3465	2.4863	10.1712	5.21582	0.883025	1.47907	1.044	0.0019875	-2.5705	Testing	-2.58194	0.00392877	-0.48207
Betain-1,2-propanediol (1 : 3.5)	308.15	185.5	0.000155556	0.283733	0.813083	2.65296	4.03369	1.59564	0.726739	0.956806	1.19776	0.191933	-5.4037	Training	-5.44111	0.00543806	-0.850943
Betain-1,2-propanediol (1 : 3.5)	308.15	297.8	0.000155556	0.283733	0.813083	2.65296	4.03369	1.59564	0.726739	0.956806	1.19776	0.191933	-4.8929	Testing	-4.88527	0.00542578	-0.695435
Betain-1,2-propanediol (1 : 3.5)	308.15	401.5	0.000155556	0.283733	0.813083	2.65296	4.03369	1.59564	0.726739	0.956806	1.19776	0.191933	-4.5469	Testing	-4.55849	0.00543126	-0.623106
Betain-1,2-propanediol (1 : 3.5)	308.15	502.3	0.000155556	0.283733	0.813083	2.65296	4.03369	1.59564	0.726739	0.956806	1.19776	0.191933	-4.3428	Testing	-4.33118	0.00545205	-0.859297
Betain-1,2-propanediol (1 : 3.5)	308.15	602	0.000155556	0.283733	0.813083	2.65296	4.03369	1.59564	0.726739	0.956806	1.19776	0.191933	-4.1352	Training	-4.14781	0.00548762	-1.0646
Betain-1,2-propanediol (1 : 3.5)	318.15	195	0.000155556	0.283733	0.813083	2.65296	4.03369	1.59564	0.726739	0.956806	1.19776	0.191933	-5.5215	Training	-5.54106	0.00550827	-0.788852
Betain-1,2-propanediol (1 : 3.5)	318.15	313	0.000155556	0.283733	0.813083	2.65296	4.03369	1.59564	0.726739	0.956806	1.19776	0.191933	-5.0056	Training	-4.97962	0.00548342	-0.606291
Betain-1,2-propanediol (1 : 3.5)	318.15	430	0.000155556	0.283733	0.813083	2.65296	4.03369	1.59564	0.726739	0.956806	1.19776	0.191933	-4.646	Training	-4.63145	0.00547941	-0.595819
Betain-1,2-propanediol (1 : 3.5)	318.15	527.8	0.000155556	0.283733	0.813083	2.65296	4.03369	1.59564	0.726739	0.956806	1.19776	0.191933	-4.4312	Training	-4.41936	0.00549183	-0.789907
Betain-1,2-propanediol (1 : 3.5)	318.15	633	0.000155556	0.283733	0.813083	2.65296	4.03369	1.59564	0.726739	0.956806	1.19776	0.191933	-4.2267	Training	-4.22753	0.00552121	-1.06146
Betain-1,2-propanediol (1 : 3.5)	328.15	204.5	0.000155556	0.283733	0.813083	2.65296	4.03369	1.59564	0.726739	0.956806	1.19776	0.191933	-5.6268	Training	-5.62902	0.00576371	-0.697205
Betain-1,2-propanediol (1 : 3.5)	328.15	327.8	0.000155556	0.283733	0.813083	2.65296	4.03369	1.59564	0.726739	0.956806	1.19776	0.191933	-5.0995	Training	-5.06388	0.00572521	-0.492552
Betain-1,2-propanediol (1 : 3.5)	328.15	442	0.000155556	0.283733	0.813083	2.65296	4.03369	1.59564	0.726739	0.956806	1.19776	0.191933	-4.733	Training	-4.73286	0.00570991	-0.445669
Betain-1,2-propanediol (1 : 3.5)	328.15	552.5	0.000155556	0.283733	0.813083	2.65296	4.03369	1.59564	0.726739	0.956806	1.19776	0.191933	-4.519	Training	-4.49612	0.00571374	-0.732802
Betain-1,2-propanediol (1 : 3.5)	328.15	662.8	0.000155556	0.283733	0.813083	2.65296	4.03369	1.59564	0.726739	0.956806	1.19776	0.191933	-4.3125	Testing	-4.29627	0.00573584	-1.05183
Betain-1,2-propanediol (1 : 3.5)	338.15	213.5	0.000155556	0.283733	0.813083	2.65296	4.03369	1.59564	0.726739	0.956806	1.19776	0.191933	-5.7138	Testing	-5.71325	0.00620461	-0.578416
Betain-1,2-propanediol (1 : 3.5)	338.15	341.8	0.000155556	0.283733	0.813083	2.65296	4.03369	1.59564	0.726739	0.956806	1.19776	0.191933	-5.185	Training	-5.14468	0.00615139	-0.353209
Betain-1,2-propanediol (1 : 3.5)	338.15	461.3	0.000155556	0.283733	0.813083	2.65296	4.03369	1.59564	0.726739	0.956806	1.19776	0.191933	-4.8159	Testing	-4.80954	0.00612404	-0.367511
Betain-1,2-propanediol (1 : 3.5)	338.15	576.3	0.000155556	0.283733	0.813083	2.65296	4.03369	1.59564	0.726739	0.956806	1.19776	0.191933	-4.5952	Testing	-4.56757	0.00611797	-0.665145
Betain-1,2-propanediol (1 : 3.5)	338.15	691.8	0.000155556	0.283733	0.813083	2.65296	4.03369	1.59564	0.726739	0.956806	1.19776	0.191933	-4.382	Testing	-4.35971	0.00613185	-0.983682
Betain-1,2-propanediol (1 : 3.5)	348.15	222.3	0.000155556	0.283733	0.813083	2.65296	4.03369	1.59564	0.726739	0.956806	1.19776	0.191933	-5.8091	Training	-5.79846	0.00683097	-0.425536
Betain-1,2-propanediol (1 : 3.5)	348.15	355.5	0.000155556	0.283733	0.813083	2.65296	4.03369	1.59564	0.726739	0.956806	1.19776	0.191933	-5.2591	Testing	-5.22674	0.006762	-0.217063
Betain-1,2-propanediol (1 : 3.5)	348.15	480	0.000155556	0.283733	0.813083	2.65296	4.03369	1.59564	0.726739	0.956806	1.19776	0.191933	-4.8796	Training	-4.88764	0.00672161	-0.181068
Betain-1,2-propanediol (1 : 3.5)	348.15	599.5	0.000155556	0.283733	0.813083	2.65296	4.03369	1.59564	0.726739	0.956806	1.19776	0.191933	-4.6565	Testing	-4.64018	0.00670473	-0.537179
Betain-1,2-propanediol (1 : 3.5)	348.15	719.8	0.000155556	0.283733	0.813083	2.65296	4.03369	1.59564	0.726739	0.956806	1.19776	0.191933	-4.4482	Training	-4.42557	0.00670939	-0.882234
Betain-1,2-propanediol (1 : 4)	308.15	193.8	0.00016	0.29184	0.80304	2.55891	4.04473	1.62824	0.7377	0.96262	1.16937	0.17301	-5.3602	Training	-5.37682	0.00457388	-0.91932
Betain-1,2-propanediol (1 : 4)	308.15	303.3	0.00016	0.29184	0.80304	2.55891	4.04473	1.62824	0.7377	0.96262	1.16937	0.17301	-4.8536	Training	-4.85524	0.00454492	-0.641981
Betain-1,2-propanediol (1 : 4)	308.15	405.3	0.00016	0.29184	0.80304	2.55891	4.04473	1.62824	0.7377	0.96262	1.16937	0.17301	-4.519	Training	-4.54082	0.00453414	-0.582957
Betain-1,2-propanediol (1 : 4)	308.15	504.5	0.00016	0.29184	0.80304	2.55891	4.04473	1.62824	0.7377	0.96262	1.16937	0.17301	-4.3275	Testing	-4.31875	0.00453864	-0.861585
Betain-1,2-propanediol (1 : 4)	308.15	605	0.00016	0.29184	0.80304	2.55891	4.04473	1.62824	0.7377	0.96262	1.16937	0.17301	-4.1166	Training	-4.13424	0.00455826	-1.06487
Betain-1,2-propanediol (1 : 4)	318.15	202.8	0.00016	0.29184	0.80304	2.55891	4.04473	1.62824	0.7377	0.96262	1.16937	0.17301	-5.4968	Training	-5.4902	0.00474865	-0.892737
Betain-1,2-propanediol (1 : 4)	318.15	317.8	0.00016	0.29184	0.80304	2.55891	4.04473	1.62824	0.7377	0.96262	1.16937	0.17301	-4.9618	Testing	-4.96187	0.00470649	-0.584841
Betain-1,2-propanediol (1 : 4)	318.15	420	0.00016	0.29184	0.80304	2.55891	4.04473	1.62824	0.7377	0.96262	1.16937	0.17301	-4.6565	Testing	-4.65689	0.00468568	-0.596301
Betain-1,2-propanediol (1 : 4)	318.15	528.5	0.00016	0.29184	0.80304	2.55891	4.04473	1.62824	0.7377	0.96262	1.16937	0.17301	-4.4228	Testing	-4.41854	0.00468075	-0.818061
Betain-1,2-propanediol (1 : 4)	318.15	634	0.00016	0.29184	0.80304	2.55891	4.04473	1.62824	0.7377	0.96262	1.16937	0.17301	-4.2064	Testing	-4.2263	0.00469289	-1.05881
Betain-1,2-propanediol (1 : 4)	328.15	211	0.00016	0.29184	0.80304	2.55891	4.04473	1.62824	0.7377	0.96262	1.16937	0.17301	-5.5728	Testing	-5.59439	0.00510919	-0.730585
Betain-1,2-propanediol (1 : 4)	328.15	331.8	0.00016	0.29184	0.80304	2.55891	4.04473	1.62824	0.7377	0.96262	1.16937	0.17301	-5.0515	Testing	-5.05683	0.00505244	-0.457969
Betain-1,2-propanediol (1 : 4)	328.15	438.5	0.00016	0.29184	0.80304	2.55891	4.04473	1.62824	0.7377	0.96262	1.16937	0.17301	-4.7444	Training	-4.74909	0.00502053	-0.470221
Betain-1,2-propanediol (1 : 4)	328.15	552	0.00016	0.29184	0.80304	2.55891	4.04473	1.62824	0.7377	0.96262	1.16937	0.17301	-4.5099	Testing	-4.50474	0.00500535	-0.752011
Betain-1,2-propanediol (1 : 4)	328.15	662.5	0.00016	0.29184	0.80304	2.55891	4.04473	1.62824	0.7377	0.96262	1.16937	0.17301	-4.2977	Training	-4.30478	0.00500914	-1.02181
Betain-1,2-propanediol (1 : 4)	338.15	220	0.00016	0.29184	0.80304	2.55891	4.04473	1.62824	0.7377	0.96262	1.16937	0.17301	-5.684	Testing	-5.68564	0.0056547	-0.645646
Betain-1,2-propanediol (1 : 4)	338.15	345.5	0.00016	0.29184	0.80304	2.55891	4.04473	1.62824	0.7377	0.96262	1.16937	0.17301	-5.1328	Testing	-5.1448	0.00558284	-0.309515
Betain-1,2-propanediol (1 : 4)	338.15	456.8	0.00016	0.29184	0.80304	2.55891	4.04473	1.62824	0.7377	0.96262	1.16937	0.17301	-4.8283	Testing	-4.83343	0.00553889	-0.386863
Betain-1,2-propanediol (1 : 4)	338.15	574.5	0.00016	0.29184	0.80304	2.55891	4.04473	1.62824	0.7377	0.96262	1.16937	0.17301	-4.5756	Training	-4.58437	0.00551264	-0.605268
Betain-1,2-propanediol (1 : 4)	338.15	689.8	0.00016	0.29184	0.80304	2.55891	4.04473	1.62824	0.7377	0.96262	1.16937	0.17301	-4.3662	Training	-4.37733	0.00550709	-0.93773
Betain-1,2-propanediol (1 : 4)	348.15	225.8	0.00016	0.29184	0.80304	2.55891	4.04473	1.62824	0.7377	0.96262	1.16937	0.17301	-5.7764	Training	-5.79262	0.00638801	-0.433597
Betain-1,2-propanediol (1 : 4)	348.15	359	0.00016	0.29184	0.80304	2.55891	4.04473	1.62824	0.7377	0.96262	1.16937	0.17301	-5.2214	Training	-5.2322	0.00629771	-0.143462
Betain-1,2-propanediol (1 : 4)	348.15	474.3	0.00016	0.29184	0.80304	2.55891	4.04473	1.62824	0.7377	0.96262	1.16937	0.17301	-4.8929	Training	-4.91831	0.00624104	-0.194322
Betain-1,2-propanediol (1 : 4)	348.15	596.8	0.00016	0.29184	0.80304	2.55891	4.04473	1.62824	0.7377	0.96262	1.16937	0.17301	-4.646	Training	-4.66317	0.0062027	-0.489797
Betain-1,2-propanediol (1 : 4)	348.15	716.8	0.00016	0.29184	0.80304	2.55891	4.04473	1.62824	0.7377	0.96262	1.16937	0.17301	-4.4312	Testing	-4.44995	0.00618698	-0.862607
ChCl-DEG (1 : 4)	293.15	110.4	0	0.11608	1.01195	3.73249	5.44256	1.30326	0.84497	1.50136	1.65147	0.00076	-5.5468	Training	-5.49015	0.00415503	-0.754083
ChCl-DEG (1 : 4)	293.15	210.5	0	0.11608	1.01195	3.73249	5.44256	1.30326	0.84497	1.50136	1.65147	0.00076	-4.8409	Training	-4.85401	0.00407153	-0.753272
ChCl-DEG (1 : 4)	293.15	313.8	0	0.11608	1.01195	3.73249	5.44256	1.30326	0.84497	1.50136	1.65147	0.00076	-4.3982	Training	-4.41735	0.00400112	-0.447985
ChCl-DEG (1 : 4)	293.15	412.3	0	0.11608	1.01195	3.73249	5.44256	1.30326	0.84497	1.50136	1.65147	0.00076	-4.1105	Testing	-4.12756	0.00394891	-0.501343
ChCl-DEG (1 : 4)	293.15	508.8	0	0.11608	1.01195	3.73249	5.44256	1.30326	0.84497	1.50136	1.65147	0.00076	-3.8873	Training	-3.90917	0.00391188	-0.639626
ChCl-DEG (1 : 4)	303.15	115.8	0	0.11608	1.01195	3.73249	5.44256	1.30326	0.84497	1.50136	1.65147	0.00076	-5.684	Testing	-5.59301	0.0038051	-0.687418
ChCl-DEG (1 : 4)	303.15	218.4	0	0.11608	1.01195	3.73249	5.44256	1.30326	0.84497	1.50136	1.65147	0.00076	-5.0207	Testing	-4.96398	0.00370824	-0.813475
ChCl-DEG (1 : 4)	303.15	318.7	0	0.11608	1.01195	3.73249	5.44256	1.30326	0.84497	1.50136	1.65147	0.00076	-4.6152	Training	-4.55657	0.00362882	-0.554248
ChCl-DEG (1 : 4)	303.15	417.2	0	0.11608	1.01195	3.73249	5.44256	1.30326	0.84497	1.50136	1.65147	0.00076	-4.32	Testing	-4.27695	0.00356553	-0.588136
ChCl-DEG (1 : 4)	303.15	519	0	0.11608	1.01195	3.73249	5.44256	1.30326	0.84497	1.50136	1.65147	0.00076	-4.0923	Training	-4.05646	0.00351541	-0.755557
ChCl-DEG (1 : 4)	313.15	116.5	0	0.11608	1.01195	3.73249	5.44256	1.30326	0.84497	1.50136	1.65147	0.00076	-5.8091	Training	-5.75581	0.00364662	-0.462305
ChCl-DEG (1 : 4)	313.15	217.1	0	0.11608	1.01195	3.73249	5.44256	1.30326	0.84497	1.50136	1.65147	0.00076	-5.1328	Training	-5.14432	0.00353954	-0.606846
ChCl-DEG (1 : 4)	313.15	313.5	0	0.11608	1.01195	3.73249	5.44256	1.30326	0.84497	1.50136	1.65147	0.00076	-4.733	Training	-4.75324	0.00345119	-0.353468
ChCl-DEG (1 : 4)	313.15	416	0	0.11608	1.01195	3.73249	5.44256	1.30326	0.84497	1.50136	1.65147	0.00076	-4.4312	Testing	-4.46454	0.00337255	-0.404143
ChCl-DEG (1 : 4)	313.15	518.2	0	0.11608	1.01195	3.73249	5.44256	1.30326	0.84497	1.50136	1.65147	0.00076	-4.2199	Training	-4.24821	0.00330983	-0.609529
ChCl-DEG (1 : 4)	323.15	116.7	0	0.11608	1.01195	3.73249	5.44256	1.30326	0.84497	1.50136	1.65147	0.00076	-6.0748	Training	-5.94303	0.00367596	-0.583574
ChCl-DEG (1 : 4)	323.15	221.2	0	0.11608	1.01195	3.73249	5.44256	1.30326	0.84497	1.50136	1.65147	0.00076	-5.4037	Training	-5.31794	0.00355254	-0.834809
ChCl-DEG (1 : 4)	323.15	327.4	0	0.11608	1.01195	3.73249	5.44256	1.30326	0.84497	1.50136	1.65147	0.00076	-4.9337	Testing	-4.90598	0.00344391	-0.512184
ChCl-DEG (1 : 4)	323.15	419.2	0	0.11608	1.01195	3.73249	5.44256	1.30326	0.84497	1.50136	1.65147	0.00076	-4.646	Testing	-4.65847	0.00336366	-0.491259
ChCl-DEG (1 : 4)	323.15	526.9	0	0.11608	1.01195	3.73249	5.44256	1.30326	0.84497	1.50136	1.65147	0.00076	-4.4145	Training	-4.43769	0.00328563	-0.690104
ChCl-FA (1 : 4)	303.15	82.5	0	0.2244	0.84007	3.95593	2.777	2.56418	1.90317	0.9142	1.12319	0.00076	-5.7446	Training	-5.76115	0.00300651	-0.0614418
ChCl-FA (1 : 4)	303.15	212.1	0	0.2244	0.84007	3.95593	2.777	2.56418	1.90317	0.9142	1.12319	0.00076	-4.8036	Testing	-4.82019	0.00286039	-0.117809
ChCl-FA (1 : 4)	303.15	319.3	0	0.2244	0.84007	3.95593	2.777	2.56418	1.90317	0.9142	1.12319	0.00076	-4.3741	Training	-4.3563	0.00275857	0.162564
ChCl-FA (1 : 4)	303.15	412.5	0	0.2244	0.84007	3.95593	2.777	2.56418	1.90317	0.9142	1.12319	0.00076	-4.0984	Testing	-4.10404	0.00268407	0.106703
ChCl-FA (1 : 4)	303.15	519.3	0	0.2244	0.84007	3.95593	2.777	2.56418	1.90317	0.9142	1.12319	0.00076	-3.8873	Training	-3.90647	0.00261473	-0.121947
ChCl-FA (1 : 4)	303.15	581.5	0	0.2244	0.84007	3.95593	2.777	2.56418	1.90317	0.9142	1.12319	0.00076	-3.781	Testing	-3.81432	0.00258223	-0.34676
ChCl-FA (1 : 4)	313.15	70.3	0	0.2244	0.84007	3.95593	2.777	2.56418	1.90317	0.9142	1.12319	0.00076	-5.9915	Testing	-6.00238	0.00321561	0.0459553
ChCl-FA (1 : 4)	313.15	192.2	0	0.2244	0.84007	3.95593	2.777	2.56418	1.90317	0.9142	1.12319	0.00076	-5.0515	Testing	-5.06455	0.00306062	0.0874109
ChCl-FA (1 : 4)	313.15	295.4	0	0.2244	0.84007	3.95593	2.777	2.56418	1.90317	0.9142	1.12319	0.00076	-4.6152	Training	-4.56915	0.00294684	0.206032
ChCl-FA (1 : 4)	313.15	403.5	0	0.2244	0.84007	3.95593	2.777	2.56418	1.90317	0.9142	1.12319	0.00076	-4.32	Training	-4.25174	0.0028448	0.128115
ChCl-FA (1 : 4)	313.15	502.8	0	0.2244	0.84007	3.95593	2.777	2.56418	1.90317	0.9142	1.12319	0.00076	-4.1044	Testing	-4.05855	0.00276653	-0.109307
ChCl-FA (1 : 4)	313.15	568.8	0	0.2244	0.84007	3.95593	2.777	2.56418	1.90317	0.9142	1.12319	0.00076	-4.0009	Training	-3.9563	0.00272269	-0.303848
ChCl-FA (1 : 4)	323.15	65.2	0	0.2244	0.84007	3.95593	2.777	2.56418	1.90317	0.9142	1.12319	0.00076	-6.1658	Testing	-6.19637	0.00360459	0.231867
ChCl-FA (1 : 4)	323.15	188.1	0	0.2244	0.84007	3.95593	2.777	2.56418	1.90317	0.9142	1.12319	0.00076	-5.24	Training	-5.2354	0.00343275	0.263981
ChCl-FA (1 : 4)	323.15	296.2	0	0.2244	0.84007	3.95593	2.777	2.56418	1.90317	0.9142	1.12319	0.00076	-4.7677	Testing	-4.71086	0.00330034	0.240245
ChCl-FA (1 : 4)	323.15	399.3	0	0.2244	0.84007	3.95593	2.777	2.56418	1.90317	0.9142	1.12319	0.00076	-4.4654	Testing	-4.40391	0.00319041	0.215499
ChCl-FA (1 : 4)	323.15	494.2	0	0.2244	0.84007	3.95593	2.777	2.56418	1.90317	0.9142	1.12319	0.00076	-4.2475	Testing	-4.21257	0.00310331	0.0528124
ChCl-FA (1 : 4)	323.15	565.8	0	0.2244	0.84007	3.95593	2.777	2.56418	1.90317	0.9142	1.12319	0.00076	-4.1105	Training	-4.09768	0.00304655	-0.09947
ChCl-FA (1 : 4)	333.15	86.8	0	0.2244	0.84007	3.95593	2.777	2.56418	1.90317	0.9142	1.12319	0.00076	-6.1193	Training	-6.15784	0.00413952	0.507304
ChCl-FA (1 : 4)	333.15	220.3	0	0.2244	0.84007	3.95593	2.777	2.56418	1.90317	0.9142	1.12319	0.00076	-5.2214	Testing	-5.20897	0.00394225	0.201885
ChCl-FA (1 : 4)	333.15	326.1	0	0.2244	0.84007	3.95593	2.777	2.56418	1.90317	0.9142	1.12319	0.00076	-4.8283	Training	-4.76259	0.00380492	0.365795
ChCl-FA (1 : 4)	333.15	426.6	0	0.2244	0.84007	3.95593	2.777	2.56418	1.90317	0.9142	1.12319	0.00076	-4.5282	Training	-4.49468	0.00369002	0.354013
ChCl-FA (1 : 4)	333.15	529.6	0	0.2244	0.84007	3.95593	2.777	2.56418	1.90317	0.9142	1.12319	0.00076	-4.3351	Testing	-4.30131	0.003588	0.033967
ChCl-FA (1 : 4)	333.15	585.4	0	0.2244	0.84007	3.95593	2.777	2.56418	1.90317	0.9142	1.12319	0.00076	-4.2267	Training	-4.2137	0.00353938	-0.0729097
ChCl-LEV (1 : 4)	303.15	72.5	0	0	0.54999	5.76513	3.68992	0.95934	1.17221	2.28144	1.13011	0.00076	-5.5468	Training	-5.48098	0.00503856	-0.150129
ChCl-LEV (1 : 4)	303.15	201.2	0	0	0.54999	5.76513	3.68992	0.95934	1.17221	2.28144	1.13011	0.00076	-4.519	Training	-4.52889	0.00500752	-0.0218707
ChCl-LEV (1 : 4)	303.15	305.3	0	0	0.54999	5.76513	3.68992	0.95934	1.17221	2.28144	1.13011	0.00076	-4.0923	Training	-4.0517	0.0050006	0.178649
ChCl-LEV (1 : 4)	303.15	410.6	0	0	0.54999	5.76513	3.68992	0.95934	1.17221	2.28144	1.13011	0.00076	-3.7854	Training	-3.73995	0.00501015	0.148492
ChCl-LEV (1 : 4)	303.15	508.4	0	0	0.54999	5.76513	3.68992	0.95934	1.17221	2.28144	1.13011	0.00076	-3.572	Training	-3.53285	0.00503393	-0.0489052
ChCl-LEV (1 : 4)	303.15	574.9	0	0	0.54999	5.76513	3.68992	0.95934	1.17221	2.28144	1.13011	0.00076	-3.4546	Testing	-3.41604	0.00505829	-0.279679
ChCl-LEV (1 : 4)	313.15	60	0	0	0.54999	5.76513	3.68992	0.95934	1.17221	2.28144	1.13011	0.00076	-5.843	Testing	-5.75317	0.00494189	-0.150009
ChCl-LEV (1 : 4)	313.15	176.9	0	0	0.54999	5.76513	3.68992	0.95934	1.17221	2.28144	1.13011	0.00076	-4.7677	Testing	-4.84201	0.00489646	0.292747
ChCl-LEV (1 : 4)	313.15	282.4	0	0	0.54999	5.76513	3.68992	0.95934	1.17221	2.28144	1.13011	0.00076	-4.3051	Training	-4.31534	0.00487306	0.281852
ChCl-LEV (1 : 4)	313.15	380.1	0	0	0.54999	5.76513	3.68992	0.95934	1.17221	2.28144	1.13011	0.00076	-3.99	Training	-4.00312	0.0048663	0.325633
ChCl-LEV (1 : 4)	313.15	485.1	0	0	0.54999	5.76513	3.68992	0.95934	1.17221	2.28144	1.13011	0.00076	-3.7679	Training	-3.77241	0.004875	0.0971278
ChCl-LEV (1 : 4)	313.15	565.9	0	0	0.54999	5.76513	3.68992	0.95934	1.17221	2.28144	1.13011	0.00076	-3.6009	Testing	-3.6339	0.00489297	-0.122163
ChCl-LEV (1 : 4)	323.15	83	0	0	0.54999	5.76513	3.68992	0.95934	1.17221	2.28144	1.13011	0.00076	-5.7446	Testing	-5.71242	0.00501493	0.1753
ChCl-LEV (1 : 4)	323.15	219.6	0	0	0.54999	5.76513	3.68992	0.95934	1.17221	2.28144	1.13011	0.00076	-4.7795	Testing	-4.77724	0.0049522	0.017178
ChCl-LEV (1 : 4)	323.15	321.1	0	0	0.54999	5.76513	3.68992	0.95934	1.17221	2.28144	1.13011	0.00076	-4.382	Training	-4.36324	0.00492373	0.264243
ChCl-LEV (1 : 4)	323.15	423.5	0	0	0.54999	5.76513	3.68992	0.95934	1.17221	2.28144	1.13011	0.00076	-4.0923	Training	-4.09428	0.00491068	0.214233
ChCl-LEV (1 : 4)	323.15	523.8	0	0	0.54999	5.76513	3.68992	0.95934	1.17221	2.28144	1.13011	0.00076	-3.8873	Training	-3.90829	0.00491315	-0.0209691
ChCl-LEV (1 : 4)	323.15	584.2	0	0	0.54999	5.76513	3.68992	0.95934	1.17221	2.28144	1.13011	0.00076	-3.7766	Testing	-3.8165	0.00492193	-0.224898
ChCl-LEV (1 : 4)	333.15	82.6	0	0	0.54999	5.76513	3.68992	0.95934	1.17221	2.28144	1.13011	0.00076	-6.0323	Testing	-5.87981	0.00528616	0.0159357
ChCl-LEV (1 : 4)	333.15	218.5	0	0	0.54999	5.76513	3.68992	0.95934	1.17221	2.28144	1.13011	0.00076	-4.9337	Training	-4.95685	0.00520731	0.219785
ChCl-LEV (1 : 4)	333.15	326	0	0	0.54999	5.76513	3.68992	0.95934	1.17221	2.28144	1.13011	0.00076	-4.5756	Testing	-4.52963	0.00516458	0.173193
ChCl-LEV (1 : 4)	333.15	426.2	0	0	0.54999	5.76513	3.68992	0.95934	1.17221	2.28144	1.13011	0.00076	-4.2831	Training	-4.27809	0.00514037	0.185709
ChCl-LEV (1 : 4)	333.15	528.5	0	0	0.54999	5.76513	3.68992	0.95934	1.17221	2.28144	1.13011	0.00076	-4.0864	Testing	-4.09859	0.0051312	-0.117764
ChCl-LEV (1 : 4)	333.15	587.4	0	0	0.54999	5.76513	3.68992	0.95934	1.17221	2.28144	1.13011	0.00076	-3.99	Training	-4.01487	0.00513305	-0.278301
ChCl-Phenol (1 : 4)	293.15	108.2	0.03864	0.44244	0.55071	3.54545	2.67016	2.89038	2.45733	0.8214	0.74531	0.00076	-5.4491	Testing	-5.56499	0.0037565	-0.609028
ChCl-Phenol (1 : 4)	293.15	212.1	0.03864	0.44244	0.55071	3.54545	2.67016	2.89038	2.45733	0.8214	0.74531	0.00076	-4.7915	Testing	-4.8519	0.00367064	-0.77864
ChCl-Phenol (1 : 4)	293.15	312.6	0.03864	0.44244	0.55071	3.54545	2.67016	2.89038	2.45733	0.8214	0.74531	0.00076	-4.382	Testing	-4.41413	0.00360302	-0.536599
ChCl-Phenol (1 : 4)	293.15	401.6	0.03864	0.44244	0.55071	3.54545	2.67016	2.89038	2.45733	0.8214	0.74531	0.00076	-4.1227	Testing	-4.16503	0.00355579	-0.561803
ChCl-Phenol (1 : 4)	293.15	509.2	0.03864	0.44244	0.55071	3.54545	2.67016	2.89038	2.45733	0.8214	0.74531	0.00076	-3.849	Testing	-3.95925	0.00351457	-0.68451
ChCl-Phenol (1 : 4)	303.15	115	0.03864	0.44244	0.55071	3.54545	2.67016	2.89038	2.45733	0.8214	0.74531	0.00076	-5.655	Training	-5.61558	0.00353709	-0.682493
ChCl-Phenol (1 : 4)	303.15	220	0.03864	0.44244	0.55071	3.54545	2.67016	2.89038	2.45733	0.8214	0.74531	0.00076	-5.0056	Testing	-4.91782	0.0034389	-0.897205
ChCl-Phenol (1 : 4)	303.15	323.9	0.03864	0.44244	0.55071	3.54545	2.67016	2.89038	2.45733	0.8214	0.74531	0.00076	-4.5854	Testing	-4.4861	0.00335803	-0.654287
ChCl-Phenol (1 : 4)	303.15	420.9	0.03864	0.44244	0.55071	3.54545	2.67016	2.89038	2.45733	0.8214	0.74531	0.00076	-4.2977	Training	-4.23179	0.00329716	-0.646715
ChCl-Phenol (1 : 4)	303.15	523.3	0.03864	0.44244	0.55071	3.54545	2.67016	2.89038	2.45733	0.8214	0.74531	0.00076	-4.0628	Training	-4.04578	0.00324822	-0.826295
ChCl-Phenol (1 : 4)	313.15	117.1	0.03864	0.44244	0.55071	3.54545	2.67016	2.89038	2.45733	0.8214	0.74531	0.00076	-5.7446	Testing	-5.71057	0.00350877	-0.449031
ChCl-Phenol (1 : 4)	313.15	214.2	0.03864	0.44244	0.55071	3.54545	2.67016	2.89038	2.45733	0.8214	0.74531	0.00076	-5.0832	Training	-5.06325	0.00340606	-0.57838
ChCl-Phenol (1 : 4)	313.15	320.4	0.03864	0.44244	0.55071	3.54545	2.67016	2.89038	2.45733	0.8214	0.74531	0.00076	-4.646	Testing	-4.61383	0.00330993	-0.336819
ChCl-Phenol (1 : 4)	313.15	415.8	0.03864	0.44244	0.55071	3.54545	2.67016	2.89038	2.45733	0.8214	0.74531	0.00076	-4.382	Testing	-4.35979	0.00323801	-0.396163
ChCl-Phenol (1 : 4)	313.15	504.5	0.03864	0.44244	0.55071	3.54545	2.67016	2.89038	2.45733	0.8214	0.74531	0.00076	-4.1541	Training	-4.19282	0.0031834	-0.465243
ChCl-Phenol (1 : 4)	323.15	118.2	0.03864	0.44244	0.55071	3.54545	2.67016	2.89038	2.45733	0.8214	0.74531	0.00076	-5.9145	Training	-5.81411	0.00366856	-0.332226
ChCl-Phenol (1 : 4)	323.15	221.4	0.03864	0.44244	0.55071	3.54545	2.67016	2.89038	2.45733	0.8214	0.74531	0.00076	-5.2785	Testing	-5.14043	0.00354768	-0.67302
ChCl-Phenol (1 : 4)	323.15	325.1	0.03864	0.44244	0.55071	3.54545	2.67016	2.89038	2.45733	0.8214	0.74531	0.00076	-4.8409	Testing	-4.71564	0.00344231	-0.388361
ChCl-Phenol (1 : 4)	323.15	418.4	0.03864	0.44244	0.55071	3.54545	2.67016	2.89038	2.45733	0.8214	0.74531	0.00076	-4.519	Testing	-4.47153	0.0033613	-0.298715
ChCl-Phenol (1 : 4)	323.15	529.1	0.03864	0.44244	0.55071	3.54545	2.67016	2.89038	2.45733	0.8214	0.74531	0.00076	-4.3275	Training	-4.27015	0.00328214	-0.609815
ChCl-TEG (1 : 4)	293.15	119	0	0	0.35335	5.42785	6.36208	1.49278	1.20781	1.49892	1.60659	0.01584	-5.116	Testing	-4.93896	0.00643844	-0.533406
ChCl-TEG (1 : 4)	293.15	215	0	0	0.35335	5.42785	6.36208	1.49278	1.20781	1.49892	1.60659	0.01584	-4.5099	Training	-4.36476	0.00645687	-0.660382
ChCl-TEG (1 : 4)	293.15	322.1	0	0	0.35335	5.42785	6.36208	1.49278	1.20781	1.49892	1.60659	0.01584	-4.0745	Testing	-3.94288	0.00649376	-0.427717
ChCl-TEG (1 : 4)	293.15	404.3	0	0	0.35335	5.42785	6.36208	1.49278	1.20781	1.49892	1.60659	0.01584	-3.8213	Testing	-3.71466	0.00653375	-0.419211
ChCl-TEG (1 : 4)	293.15	513.5	0	0	0.35335	5.42785	6.36208	1.49278	1.20781	1.49892	1.60659	0.01584	-3.5756	Testing	-3.47898	0.00660257	-0.618081
ChCl-TEG (1 : 4)	303.15	109.3	0	0	0.35335	5.42785	6.36208	1.49278	1.20781	1.49892	1.60659	0.01584	-5.3185	Testing	-5.19174	0.00622803	-0.332203
ChCl-TEG (1 : 4)	303.15	211.5	0	0	0.35335	5.42785	6.36208	1.49278	1.20781	1.49892	1.60659	0.01584	-4.6052	Training	-4.5675	0.00623439	-0.418604
ChCl-TEG (1 : 4)	303.15	310.4	0	0	0.35335	5.42785	6.36208	1.49278	1.20781	1.49892	1.60659	0.01584	-4.2131	Testing	-4.17005	0.00625547	-0.233353
ChCl-TEG (1 : 4)	303.15	410.5	0	0	0.35335	5.42785	6.36208	1.49278	1.20781	1.49892	1.60659	0.01584	-3.912	Training	-3.89263	0.00629176	-0.207923
ChCl-TEG (1 : 4)	303.15	513	0	0	0.35335	5.42785	6.36208	1.49278	1.20781	1.49892	1.60659	0.01584	-3.701	Training	-3.67725	0.00634451	-0.444729
ChCl-TEG (1 : 4)	313.15	119.6	0	0	0.35335	5.42785	6.36208	1.49278	1.20781	1.49892	1.60659	0.01584	-5.4727	Testing	-5.32196	0.00620477	-0.369733
ChCl-TEG (1 : 4)	313.15	219.3	0	0	0.35335	5.42785	6.36208	1.49278	1.20781	1.49892	1.60659	0.01584	-4.8159	Testing	-4.73699	0.00620038	-0.556299
ChCl-TEG (1 : 4)	313.15	315.2	0	0	0.35335	5.42785	6.36208	1.49278	1.20781	1.49892	1.60659	0.01584	-4.3901	Training	-4.36313	0.00621024	-0.212345
ChCl-TEG (1 : 4)	313.15	415	0	0	0.35335	5.42785	6.36208	1.49278	1.20781	1.49892	1.60659	0.01584	-4.0864	Training	-4.09246	0.00623515	-0.210591
ChCl-TEG (1 : 4)	313.15	519	0	0	0.35335	5.42785	6.36208	1.49278	1.20781	1.49892	1.60659	0.01584	-3.9021	Testing	-3.87866	0.00627703	-0.546992
ChCl-TEG (1 : 4)	323.15	118.8	0	0	0.35335	5.42785	6.36208	1.49278	1.20781	1.49892	1.60659	0.01584	-5.7138	Testing	-5.54936	0.00636913	-0.414064
ChCl-TEG (1 : 4)	323.15	221.4	0	0	0.35335	5.42785	6.36208	1.49278	1.20781	1.49892	1.60659	0.01584	-5.0207	Testing	-4.94815	0.00635241	-0.606507
ChCl-TEG (1 : 4)	323.15	318.6	0	0	0.35335	5.42785	6.36208	1.49278	1.20781	1.49892	1.60659	0.01584	-4.646	Training	-4.57256	0.00635116	-0.399817
ChCl-TEG (1 : 4)	323.15	420.2	0	0	0.35335	5.42785	6.36208	1.49278	1.20781	1.49892	1.60659	0.01584	-4.3125	Training	-4.3001	0.006365	-0.340523
ChCl-TEG (1 : 4)	323.15	520.3	0	0	0.35335	5.42785	6.36208	1.49278	1.20781	1.49892	1.60659	0.01584	-4.0923	Testing	-4.09579	0.0063938	-0.563715
MTPPBr-1,2-PRO (1 : 4)	298.15	220	0.00016	0.29184	0.77855	3.31126	4.81959	3.6363	0.74608	1.01368	1.47756	0.0026	-5.8421	Training	-5.44482	0.00913374	-2.91869
MTPPBr-1,2-PRO (1 : 4)	298.15	528	0.00016	0.29184	0.77855	3.31126	4.81959	3.6363	0.74608	1.01368	1.47756	0.0026	-4.3889	Training	-4.39706	0.00871366	-1.69341
MTPPBr-1,2-PRO (1 : 4)	298.15	861	0.00016	0.29184	0.77855	3.31126	4.81959	3.6363	0.74608	1.01368	1.47756	0.0026	-3.5307	Testing	-3.80958	0.0084197	-1.77618
MTPPBr-1,2-PRO (1 : 4)	298.15	1120	0.00016	0.29184	0.77855	3.31126	4.81959	3.6363	0.74608	1.01368	1.47756	0.0026	-3.2783	Testing	-3.47002	0.00830613	-1.39361
MTPPBr-1,2-PRO (1 : 4)	298.15	1547	0.00016	0.29184	0.77855	3.31126	4.81959	3.6363	0.74608	1.01368	1.47756	0.0026	-3.0317	Testing	-3.07922	0.00833876	-1.15584
MTPPBr-1,2-PRO (1 : 4)	298.15	1834	0.00016	0.29184	0.77855	3.31126	4.81959	3.6363	0.74608	1.01368	1.47756	0.0026	-2.8045	Testing	-2.8976	0.00851449	-0.853578
MTPPBr-1,2-PRO (1 : 4)	298.15	2026	0.00016	0.29184	0.77855	3.31126	4.81959	3.6363	0.74608	1.01368	1.47756	0.0026	-2.6923	Training	-2.7982	0.00870108	-0.721849
MTPPBr-AC (1 : 4)	298.15	173	0.05184	0.40972	0.43891	3.48346	3.63595	2.77302	0.93716	1.57468	0.8846	0.00044	-4.7505	Testing	-4.68591	0.0082266	-0.144874
MTPPBr-AC (1 : 4)	298.15	380	0.05184	0.40972	0.43891	3.48346	3.63595	2.77302	0.93716	1.57468	0.8846	0.00044	-3.6961	Training	-3.67211	0.00790212	0.576678
MTPPBr-AC (1 : 4)	298.15	652	0.05184	0.40972	0.43891	3.48346	3.63595	2.77302	0.93716	1.57468	0.8846	0.00044	-3.1117	Training	-3.0166	0.00757353	0.00615044
MTPPBr-AC (1 : 4)	298.15	938	0.05184	0.40972	0.43891	3.48346	3.63595	2.77302	0.93716	1.57468	0.8846	0.00044	-2.5485	Training	-2.56046	0.00734781	0.025277
MTPPBr-AC (1 : 4)	298.15	1134	0.05184	0.40972	0.43891	3.48346	3.63595	2.77302	0.93716	1.57468	0.8846	0.00044	-2.2303	Training	-2.31673	0.00726403	0.621324
MTPPBr-AC (1 : 4)	298.15	1524	0.05184	0.40972	0.43891	3.48346	3.63595	2.77302	0.93716	1.57468	0.8846	0.00044	-1.7501	Testing	-1.94927	0.00726884	1.38139
MTPPBr-AC (1 : 4)	298.15	1843	0.05184	0.40972	0.43891	3.48346	3.63595	2.77302	0.93716	1.57468	0.8846	0.00044	-1.5493	Training	-1.72946	0.00744253	1.66606
MTPPBr-AC (1 : 4)	298.15	2014	0.05184	0.40972	0.43891	3.48346	3.63595	2.77302	0.93716	1.57468	0.8846	0.00044	-1.3269	Testing	-1.63279	0.00759852	1.97927
TMACl-AC (1 : 4)	298.15	294	0.05184	0.40972	0.46518	2.74803	2.96341	0.7277	0.87524	1.48444	0.85962	0.0064	-4.7884	Training	-4.72116	0.00822451	-1.14877
TMACl-AC (1 : 4)	298.15	519	0.05184	0.40972	0.46518	2.74803	2.96341	0.7277	0.87524	1.48444	0.85962	0.0064	-3.8977	Training	-4.15606	0.00795353	-0.657733
TMACl-AC (1 : 4)	298.15	731	0.05184	0.40972	0.46518	2.74803	2.96341	0.7277	0.87524	1.48444	0.85962	0.0064	-3.8153	Testing	-3.84499	0.00776773	-1.98153
TMACl-AC (1 : 4)	298.15	1015	0.05184	0.40972	0.46518	2.74803	2.96341	0.7277	0.87524	1.48444	0.85962	0.0064	-3.646	Training	-3.54452	0.00762456	-2.48295
TMACl-AC (1 : 4)	298.15	1312	0.05184	0.40972	0.46518	2.74803	2.96341	0.7277	0.87524	1.48444	0.85962	0.0064	-3.4722	Training	-3.30026	0.00760435	-2.30887
TMACl-AC (1 : 4)	298.15	1741	0.05184	0.40972	0.46518	2.74803	2.96341	0.7277	0.87524	1.48444	0.85962	0.0064	-3.1161	Testing	-3.00119	0.00780892	-1.80946
TPACl-EA (1 : 4)	298.15	481	0	0	0.6831	2.73149	5.65802	2.03657	0.50858	0.7109	1.38066	0.07876	-3.4884	Testing	-3.18212	0.00690293	0.540308
TPACl-EA (1 : 4)	298.15	784	0	0	0.6831	2.73149	5.65802	2.03657	0.50858	0.7109	1.38066	0.07876	-2.8829	Training	-2.74946	0.00680759	-0.155371
TPACl-EA (1 : 4)	298.15	1057	0	0	0.6831	2.73149	5.65802	2.03657	0.50858	0.7109	1.38066	0.07876	-2.5235	Testing	-2.49374	0.00683971	0.171696
TPACl-EA (1 : 4)	298.15	1317	0	0	0.6831	2.73149	5.65802	2.03657	0.50858	0.7109	1.38066	0.07876	-2.3364	Testing	-2.33192	0.00697431	0.402116
TPACl-EA (1 : 4)	298.15	1700	0	0	0.6831	2.73149	5.65802	2.03657	0.50858	0.7109	1.38066	0.07876	-2.2289	Training	-2.19548	0.00735742	0.395546
TPACl-EA (1 : 4)	298.15	2009	0	0	0.6831	2.73149	5.65802	2.03657	0.50858	0.7109	1.38066	0.07876	-2.142	Training	-2.13689	0.00782699	0.354586
[MTPP]Br-GLY (1 : 4)	298.15	161	0.00328	0.28396	0.84755	4.50614	3.96651	3.0129	0.92524	1.33536	1.60928	0.00044	-6.642	Training	-6.48105	0.00736125	-3.82755
[MTPP]Br-GLY (1 : 4)	298.15	443	0.00328	0.28396	0.84755	4.50614	3.96651	3.0129	0.92524	1.33536	1.60928	0.00044	-5.3462	Training	-5.18857	0.00694254	-3.24233
[MTPP]Br-GLY (1 : 4)	298.15	875	0.00328	0.28396	0.84755	4.50614	3.96651	3.0129	0.92524	1.33536	1.60928	0.00044	-4.1444	Testing	-4.28712	0.00653261	-3.03693
[MTPP]Br-GLY (1 : 4)	298.15	1225	0.00328	0.28396	0.84755	4.50614	3.96651	3.0129	0.92524	1.33536	1.60928	0.00044	-3.5538	Training	-3.77024	0.00640591	-1.94377
[MTPP]Br-GLY (1 : 4)	298.15	1696	0.00328	0.28396	0.84755	4.50614	3.96651	3.0129	0.92524	1.33536	1.60928	0.00044	-3.3218	Testing	-3.32602	0.00652564	-1.77203
[MTPP]Br-GLY (1 : 4)	298.15	2026	0.00328	0.28396	0.84755	4.50614	3.96651	3.0129	0.92524	1.33536	1.60928	0.00044	-3.2126	Training	-3.13484	0.00680792	-1.77583
[Ch]Cl-1,4-butanediol (1 : 4)	293.15	109.5	0.00528	0.30216	0.63011	2.59549	5.66528	1.68634	0.75477	0.88912	1.48967	0.0622	-5.7764	Testing	-5.70815	0.00507981	-1.31223
[Ch]Cl-1,4-butanediol (1 : 4)	293.15	214.5	0.00528	0.30216	0.63011	2.59549	5.66528	1.68634	0.75477	0.88912	1.48967	0.0622	-5.0832	Training	-5.05954	0.00502892	-1.36838
[Ch]Cl-1,4-butanediol (1 : 4)	293.15	316.4	0.00528	0.30216	0.63011	2.59549	5.66528	1.68634	0.75477	0.88912	1.48967	0.0622	-4.6777	Training	-4.63909	0.00499535	-1.141
[Ch]Cl-1,4-butanediol (1 : 4)	293.15	411.6	0.00528	0.30216	0.63011	2.59549	5.66528	1.68634	0.75477	0.88912	1.48967	0.0622	-4.3982	Testing	-4.35723	0.00497807	-1.17655
[Ch]Cl-1,4-butanediol (1 : 4)	293.15	513.4	0.00528	0.30216	0.63011	2.59549	5.66528	1.68634	0.75477	0.88912	1.48967	0.0622	-4.1734	Testing	-4.12022	0.00497465	-1.37179
[Ch]Cl-1,4-butanediol (1 : 4)	303.15	105.8	0.00528	0.30216	0.63011	2.59549	5.66528	1.68634	0.75477	0.88912	1.48967	0.0622	-5.9145	Training	-5.91375	0.00479722	-1.05166
[Ch]Cl-1,4-butanediol (1 : 4)	303.15	205.8	0.00528	0.30216	0.63011	2.59549	5.66528	1.68634	0.75477	0.88912	1.48967	0.0622	-5.2591	Training	-5.27781	0.00473583	-1.27985
[Ch]Cl-1,4-butanediol (1 : 4)	303.15	304.7	0.00528	0.30216	0.63011	2.59549	5.66528	1.68634	0.75477	0.88912	1.48967	0.0622	-4.8036	Testing	-4.85014	0.00468988	-0.930738
[Ch]Cl-1,4-butanediol (1 : 4)	303.15	403.3	0.00528	0.30216	0.63011	2.59549	5.66528	1.68634	0.75477	0.88912	1.48967	0.0622	-4.5099	Testing	-4.54541	0.00465869	-0.943755
[Ch]Cl-1,4-butanediol (1 : 4)	303.15	503.6	0.00528	0.30216	0.63011	2.59549	5.66528	1.68634	0.75477	0.88912	1.48967	0.0622	-4.3051	Training	-4.30392	0.00464193	-1.16167
[Ch]Cl-1,4-butanediol (1 : 4)	313.15	119.5	0.00528	0.30216	0.63011	2.59549	5.66528	1.68634	0.75477	0.88912	1.48967	0.0622	-5.9522	Testing	-5.97799	0.00468895	-0.89405
[Ch]Cl-1,4-butanediol (1 : 4)	313.15	223.2	0.00528	0.30216	0.63011	2.59549	5.66528	1.68634	0.75477	0.88912	1.48967	0.0622	-5.3185	Training	-5.35307	0.00461528	-1.1032
[Ch]Cl-1,4-butanediol (1 : 4)	313.15	312.5	0.00528	0.30216	0.63011	2.59549	5.66528	1.68634	0.75477	0.88912	1.48967	0.0622	-4.9477	Training	-4.98194	0.00456478	-0.867433
[Ch]Cl-1,4-butanediol (1 : 4)	313.15	410	0.00528	0.30216	0.63011	2.59549	5.66528	1.68634	0.75477	0.88912	1.48967	0.0622	-4.646	Testing	-4.68378	0.00452331	-0.873071
[Ch]Cl-1,4-butanediol (1 : 4)	313.15	507.2	0.00528	0.30216	0.63011	2.59549	5.66528	1.68634	0.75477	0.88912	1.48967	0.0622	-4.4312	Testing	-4.44955	0.00449617	-1.05913
[Ch]Cl-1,4-butanediol (1 : 4)	323.15	123	0.00528	0.30216	0.63011	2.59549	5.66528	1.68634	0.75477	0.88912	1.48967	0.0622	-6.1193	Training	-6.10591	0.00477416	-0.822459
[Ch]Cl-1,4-butanediol (1 : 4)	323.15	221.6	0.00528	0.30216	0.63011	2.59549	5.66528	1.68634	0.75477	0.88912	1.48967	0.0622	-5.5468	Training	-5.51102	0.00469244	-1.18953
[Ch]Cl-1,4-butanediol (1 : 4)	323.15	332.6	0.00528	0.30216	0.63011	2.59549	5.66528	1.68634	0.75477	0.88912	1.48967	0.0622	-5.0832	Testing	-5.06004	0.00461791	-0.908556
[Ch]Cl-1,4-butanediol (1 : 4)	323.15	425.3	0.00528	0.30216	0.63011	2.59549	5.66528	1.68634	0.75477	0.88912	1.48967	0.0622	-4.8159	Training	-4.78826	0.00456983	-0.923445
[Ch]Cl-1,4-butanediol (1 : 4)	323.15	519	0.00528	0.30216	0.63011	2.59549	5.66528	1.68634	0.75477	0.88912	1.48967	0.0622	-4.5854	Testing	-4.56688	0.00453435	-1.06629
[Ch]Cl-2,3-butanediol (1 : 4)	293.15	107.1	0	0.20392	0.87751	2.82809	4.87164	2.20878	0.72513	1.09484	1.44671	0.007	-5.5728	Training	-5.64163	0.00425001	-0.674871
[Ch]Cl-2,3-butanediol (1 : 4)	293.15	207.2	0	0.20392	0.87751	2.82809	4.87164	2.20878	0.72513	1.09484	1.44671	0.007	-4.9477	Training	-4.98602	0.00413203	-0.892709
[Ch]Cl-2,3-butanediol (1 : 4)	293.15	309.7	0	0.20392	0.87751	2.82809	4.87164	2.20878	0.72513	1.09484	1.44671	0.007	-4.519	Testing	-4.54346	0.00402681	-0.638646
[Ch]Cl-2,3-butanediol (1 : 4)	293.15	403	0	0.20392	0.87751	2.82809	4.87164	2.20878	0.72513	1.09484	1.44671	0.007	-4.2131	Training	-4.26759	0.00394474	-0.561172
[Ch]Cl-2,3-butanediol (1 : 4)	293.15	508.5	0	0.20392	0.87751	2.82809	4.87164	2.20878	0.72513	1.09484	1.44671	0.007	-3.9739	Training	-4.03595	0.00386769	-0.752835
[Ch]Cl-2,3-butanediol (1 : 4)	303.15	117.6	0	0.20392	0.87751	2.82809	4.87164	2.20878	0.72513	1.09484	1.44671	0.007	-5.655	Training	-5.65125	0.00424422	-0.546492
[Ch]Cl-2,3-butanediol (1 : 4)	303.15	218.7	0	0.20392	0.87751	2.82809	4.87164	2.20878	0.72513	1.09484	1.44671	0.007	-4.9908	Training	-5.01791	0.00411461	-0.635171
[Ch]Cl-2,3-butanediol (1 : 4)	303.15	320.1	0	0.20392	0.87751	2.82809	4.87164	2.20878	0.72513	1.09484	1.44671	0.007	-4.5854	Training	-4.59947	0.00400003	-0.40444
[Ch]Cl-2,3-butanediol (1 : 4)	303.15	409.2	0	0.20392	0.87751	2.82809	4.87164	2.20878	0.72513	1.09484	1.44671	0.007	-4.3125	Testing	-4.34345	0.00391209	-0.426815
[Ch]Cl-2,3-butanediol (1 : 4)	303.15	511.2	0	0.20392	0.87751	2.82809	4.87164	2.20878	0.72513	1.09484	1.44671	0.007	-4.0923	Testing	-4.12195	0.00382605	-0.63413
[Ch]Cl-2,3-butanediol (1 : 4)	313.15	110.9	0	0.20392	0.87751	2.82809	4.87164	2.20878	0.72513	1.09484	1.44671	0.007	-5.8091	Training	-5.81563	0.0044488	-0.280481
[Ch]Cl-2,3-butanediol (1 : 4)	313.15	217.2	0	0.20392	0.87751	2.82809	4.87164	2.20878	0.72513	1.09484	1.44671	0.007	-5.0995	Testing	-5.13789	0.00429913	-0.466737
[Ch]Cl-2,3-butanediol (1 : 4)	313.15	318	0	0.20392	0.87751	2.82809	4.87164	2.20878	0.72513	1.09484	1.44671	0.007	-4.7444	Training	-4.71789	0.00417288	-0.323324
[Ch]Cl-2,3-butanediol (1 : 4)	313.15	414.9	0	0.20392	0.87751	2.82809	4.87164	2.20878	0.72513	1.09484	1.44671	0.007	-4.4397	Testing	-4.43962	0.00406589	-0.328464
[Ch]Cl-2,3-butanediol (1 : 4)	313.15	511	0	0.20392	0.87751	2.82809	4.87164	2.20878	0.72513	1.09484	1.44671	0.007	-4.2336	Training	-4.23139	0.0039737	-0.500847
[Ch]Cl-2,3-butanediol (1 : 4)	323.15	116.4	0	0.20392	0.87751	2.82809	4.87164	2.20878	0.72513	1.09484	1.44671	0.007	-5.8091	Training	-5.90738	0.00482279	0.131682
[Ch]Cl-2,3-butanediol (1 : 4)	323.15	214.1	0	0.20392	0.87751	2.82809	4.87164	2.20878	0.72513	1.09484	1.44671	0.007	-5.2591	Training	-5.28627	0.0046737	-0.315321
[Ch]Cl-2,3-butanediol (1 : 4)	323.15	315.9	0	0.20392	0.87751	2.82809	4.87164	2.20878	0.72513	1.09484	1.44671	0.007	-4.8536	Training	-4.85547	0.00453359	-0.12446
[Ch]Cl-2,3-butanediol (1 : 4)	323.15	425.7	0	0.20392	0.87751	2.82809	4.87164	2.20878	0.72513	1.09484	1.44671	0.007	-4.5469	Training	-4.54167	0.00439992	-0.187389
[Ch]Cl-2,3-butanediol (1 : 4)	323.15	512.5	0	0.20392	0.87751	2.82809	4.87164	2.20878	0.72513	1.09484	1.44671	0.007	-4.3428	Testing	-4.35491	0.00430705	-0.357317
[Ch]Cl-1,2-propanediol (1 : 4)	293.15	104.4	0.00016	0.29184	0.92235	2.83901	3.94004	1.58806	0.80005	1.11172	1.45643	0.00292	-5.7764	Testing	-5.7652	0.00244051	-0.919306
[Ch]Cl-1,2-propanediol (1 : 4)	293.15	209.6	0.00016	0.29184	0.92235	2.83901	3.94004	1.58806	0.80005	1.11172	1.45643	0.00292	-5.0515	Training	-5.06606	0.00229462	-0.931301
[Ch]Cl-1,2-propanediol (1 : 4)	293.15	307.6	0.00016	0.29184	0.92235	2.83901	3.94004	1.58806	0.80005	1.11172	1.45643	0.00292	-4.667	Training	-4.63259	0.00217367	-0.725583
[Ch]Cl-1,2-propanediol (1 : 4)	293.15	401.1	0.00016	0.29184	0.92235	2.83901	3.94004	1.58806	0.80005	1.11172	1.45643	0.00292	-4.3662	Testing	-4.34187	0.00207171	-0.707944
[Ch]Cl-1,2-propanediol (1 : 4)	293.15	501.5	0.00016	0.29184	0.92235	2.83901	3.94004	1.58806	0.80005	1.11172	1.45643	0.00292	-4.1044	Training	-4.10454	0.00197684	-0.787088
[Ch]Cl-1,2-propanediol (1 : 4)	303.15	117.2	0.00016	0.29184	0.92235	2.83901	3.94004	1.58806	0.80005	1.11172	1.45643	0.00292	-5.9145	Testing	-5.88124	0.00254844	-0.963354
[Ch]Cl-1,2-propanediol (1 : 4)	303.15	220.1	0.00016	0.29184	0.92235	2.83901	3.94004	1.58806	0.80005	1.11172	1.45643	0.00292	-5.2983	Training	-5.23151	0.00239521	-1.14822
[Ch]Cl-1,2-propanediol (1 : 4)	303.15	321.7	0.00016	0.29184	0.92235	2.83901	3.94004	1.58806	0.80005	1.11172	1.45643	0.00292	-4.8929	Training	-4.80624	0.00225951	-0.918922
[Ch]Cl-1,2-propanediol (1 : 4)	303.15	415.6	0.00016	0.29184	0.92235	2.83901	3.94004	1.58806	0.80005	1.11172	1.45643	0.00292	-4.5952	Training	-4.53008	0.00214788	-0.889007
[Ch]Cl-1,2-propanediol (1 : 4)	303.15	517.5	0.00016	0.29184	0.92235	2.83901	3.94004	1.58806	0.80005	1.11172	1.45643	0.00292	-4.3505	Training	-4.30036	0.00204171	-1.04183
[Ch]Cl-1,2-propanediol (1 : 4)	313.15	121.6	0.00016	0.29184	0.92235	2.83901	3.94004	1.58806	0.80005	1.11172	1.45643	0.00292	-6.1658	Training	-6.07472	0.00285496	-1.10833
[Ch]Cl-1,2-propanediol (1 : 4)	313.15	225.2	0.00016	0.29184	0.92235	2.83901	3.94004	1.58806	0.80005	1.11172	1.45643	0.00292	-5.4491	Testing	-5.43611	0.00268901	-1.11375
[Ch]Cl-1,2-propanediol (1 : 4)	313.15	325.1	0.00016	0.29184	0.92235	2.83901	3.94004	1.58806	0.80005	1.11172	1.45643	0.00292	-5.116	Training	-5.02775	0.00254425	-1.02884
[Ch]Cl-1,2-propanediol (1 : 4)	313.15	421.4	0.00016	0.29184	0.92235	2.83901	3.94004	1.58806	0.80005	1.11172	1.45643	0.00292	-4.8159	Training	-4.75091	0.00241889	-1.01048
[Ch]Cl-1,2-propanediol (1 : 4)	313.15	525.6	0.00016	0.29184	0.92235	2.83901	3.94004	1.58806	0.80005	1.11172	1.45643	0.00292	-4.5469	Training	-4.52213	0.00229892	-1.12235
[Ch]Cl-1,2-propanediol (1 : 4)	323.15	122.5	0.00016	0.29184	0.92235	2.83901	3.94004	1.58806	0.80005	1.11172	1.45643	0.00292	-6.2146	Testing	-6.30007	0.0033541	-0.750894
[Ch]Cl-1,2-propanediol (1 : 4)	323.15	226.6	0.00016	0.29184	0.92235	2.83901	3.94004	1.58806	0.80005	1.11172	1.45643	0.00292	-5.6268	Testing	-5.66385	0.00317505	-1.1022
[Ch]Cl-1,2-propanediol (1 : 4)	323.15	326.5	0.00016	0.29184	0.92235	2.83901	3.94004	1.58806	0.80005	1.11172	1.45643	0.00292	-5.2591	Testing	-5.25971	0.00301853	-0.952828
[Ch]Cl-1,2-propanediol (1 : 4)	323.15	425	0.00016	0.29184	0.92235	2.83901	3.94004	1.58806	0.80005	1.11172	1.45643	0.00292	-4.9477	Testing	-4.98041	0.00287887	-0.924112
[Ch]Cl-1,2-propanediol (1 : 4)	323.15	519.8	0.00016	0.29184	0.92235	2.83901	3.94004	1.58806	0.80005	1.11172	1.45643	0.00292	-4.7444	Testing	-4.77368	0.00275821	-1.11994
Betain-diethylene glycol (1 : 4)	308.15	200.5	0	0.11608	0.89264	3.45239	5.54725	1.34344	0.78262	1.35226	1.36441	0.17085	-4.8536	Training	-4.87375	0.00670274	-0.12992
Betain-diethylene glycol (1 : 4)	308.15	343.3	0	0.11608	0.89264	3.45239	5.54725	1.34344	0.78262	1.35226	1.36441	0.17085	-4.2831	Training	-4.28871	0.00674815	0.106359
Betain-diethylene glycol (1 : 4)	308.15	439.8	0	0.11608	0.89264	3.45239	5.54725	1.34344	0.78262	1.35226	1.36441	0.17085	-4.0118	Training	-4.04385	0.00679616	0.0551923
Betain-diethylene glycol (1 : 4)	308.15	525	0	0.11608	0.89264	3.45239	5.54725	1.34344	0.78262	1.35226	1.36441	0.17085	-3.8304	Training	-3.87522	0.00685017	-0.127429
Betain-diethylene glycol (1 : 4)	308.15	632.5	0	0.11608	0.89264	3.45239	5.54725	1.34344	0.78262	1.35226	1.36441	0.17085	-3.6344	Training	-3.69204	0.00693387	-0.43559
Betain-diethylene glycol (1 : 4)	318.15	223.3	0	0.11608	0.89264	3.45239	5.54725	1.34344	0.78262	1.35226	1.36441	0.17085	-4.9337	Testing	-4.9197	0.00641154	-0.162043
Betain-diethylene glycol (1 : 4)	318.15	362.8	0	0.11608	0.89264	3.45239	5.54725	1.34344	0.78262	1.35226	1.36441	0.17085	-4.4063	Training	-4.38766	0.0064436	0.117087
Betain-diethylene glycol (1 : 4)	318.15	464.5	0	0.11608	0.89264	3.45239	5.54725	1.34344	0.78262	1.35226	1.36441	0.17085	-4.1289	Testing	-4.13907	0.00648539	0.0062464
Betain-diethylene glycol (1 : 4)	318.15	554.3	0	0.11608	0.89264	3.45239	5.54725	1.34344	0.78262	1.35226	1.36441	0.17085	-3.9425	Testing	-3.96381	0.00653519	-0.19357
Betain-diethylene glycol (1 : 4)	318.15	668.5	0	0.11608	0.89264	3.45239	5.54725	1.34344	0.78262	1.35226	1.36441	0.17085	-3.7465	Training	-3.76788	0.00661601	-0.517047
Betain-diethylene glycol (1 : 4)	328.15	234	0	0.11608	0.89264	3.45239	5.54725	1.34344	0.78262	1.35226	1.36441	0.17085	-5.0207	Testing	-5.03373	0.00630263	-0.00569128
Betain-diethylene glycol (1 : 4)	328.15	381.3	0	0.11608	0.89264	3.45239	5.54725	1.34344	0.78262	1.35226	1.36441	0.17085	-4.519	Testing	-4.49246	0.00632207	0.120753
Betain-diethylene glycol (1 : 4)	328.15	488.5	0	0.11608	0.89264	3.45239	5.54725	1.34344	0.78262	1.35226	1.36441	0.17085	-4.2405	Training	-4.23752	0.00635668	0.0488746
Betain-diethylene glycol (1 : 4)	328.15	583	0	0.11608	0.89264	3.45239	5.54725	1.34344	0.78262	1.35226	1.36441	0.17085	-4.0456	Testing	-4.05441	0.00640151	-0.201199
Betain-diethylene glycol (1 : 4)	328.15	703.3	0	0.11608	0.89264	3.45239	5.54725	1.34344	0.78262	1.35226	1.36441	0.17085	-3.8538	Training	-3.84652	0.00647796	-0.578542
Betain-diethylene glycol (1 : 4)	338.15	245.5	0	0.11608	0.89264	3.45239	5.54725	1.34344	0.78262	1.35226	1.36441	0.17085	-5.1499	Testing	-5.15414	0.00637863	0.0472108
Betain-diethylene glycol (1 : 4)	338.15	399	0	0.11608	0.89264	3.45239	5.54725	1.34344	0.78262	1.35226	1.36441	0.17085	-4.6152	Training	-4.6094	0.00638385	0.247304
Betain-diethylene glycol (1 : 4)	338.15	511.5	0	0.11608	0.89264	3.45239	5.54725	1.34344	0.78262	1.35226	1.36441	0.17085	-4.3351	Testing	-4.34723	0.00641013	0.0641703
Betain-diethylene glycol (1 : 4)	338.15	610.5	0	0.11608	0.89264	3.45239	5.54725	1.34344	0.78262	1.35226	1.36441	0.17085	-4.1414	Training	-4.15603	0.00644898	-0.150487
Betain-diethylene glycol (1 : 4)	338.15	736.8	0	0.11608	0.89264	3.45239	5.54725	1.34344	0.78262	1.35226	1.36441	0.17085	-3.9477	Testing	-3.93661	0.00651989	-0.623197
Betain-diethylene glycol (1 : 4)	348.15	256.3	0	0.11608	0.89264	3.45239	5.54725	1.34344	0.78262	1.35226	1.36441	0.17085	-5.2591	Training	-5.29351	0.00663956	0.191077
Betain-diethylene glycol (1 : 4)	348.15	416.3	0	0.11608	0.89264	3.45239	5.54725	1.34344	0.78262	1.35226	1.36441	0.17085	-4.7105	Training	-4.74251	0.0066292	0.339788
Betain-diethylene glycol (1 : 4)	348.15	533.8	0	0.11608	0.89264	3.45239	5.54725	1.34344	0.78262	1.35226	1.36441	0.17085	-4.4312	Training	-4.47285	0.00664606	0.156808
Betain-diethylene glycol (1 : 4)	348.15	637.3	0	0.11608	0.89264	3.45239	5.54725	1.34344	0.78262	1.35226	1.36441	0.17085	-4.2336	Testing	-4.27323	0.00667808	-0.152455
Betain-diethylene glycol (1 : 4)	348.15	769.3	0	0.11608	0.89264	3.45239	5.54725	1.34344	0.78262	1.35226	1.36441	0.17085	-4.0399	Training	-4.04321	0.00674225	-0.608307
[Ch]Cl-1,2-butanediol (1 : 4)	303.15	371.3	0.0016	0.22732	0.91411	2.58649	5.22108	2.2261	0.74201	1.1082	1.39947	0.00108	-4.4312	Testing	-4.39451	0.0027297	-0.498675
[Ch]Cl-1,2-butanediol (1 : 4)	303.15	797.5	0.0016	0.22732	0.91411	2.58649	5.22108	2.2261	0.74201	1.1082	1.39947	0.00108	-3.6574	Training	-3.64717	0.0023517	-1.70149
[Ch]Cl-1,2-butanediol (1 : 4)	303.15	1225.5	0.0016	0.22732	0.91411	2.58649	5.22108	2.2261	0.74201	1.1082	1.39947	0.00108	-3.2289	Training	-3.22825	0.00224649	-1.28875
[Ch]Cl-1,2-butanediol (1 : 4)	303.15	1646.3	0.0016	0.22732	0.91411	2.58649	5.22108	2.2261	0.74201	1.1082	1.39947	0.00108	-2.8842	Testing	-2.9727	0.00241113	-0.829371
[Ch]Cl-1,2-butanediol (1 : 4)	303.15	2076.8	0.0016	0.22732	0.91411	2.58649	5.22108	2.2261	0.74201	1.1082	1.39947	0.00108	-2.6664	Testing	-2.78055	0.00285463	-0.661093
[Ch]Cl-1,2-butanediol (1 : 4)	303.15	2507.8	0.0016	0.22732	0.91411	2.58649	5.22108	2.2261	0.74201	1.1082	1.39947	0.00108	-2.4901	Testing	-2.61047	0.00357732	-0.589404
[Ch]Cl-1,2-butanediol (1 : 4)	303.15	2956.8	0.0016	0.22732	0.91411	2.58649	5.22108	2.2261	0.74201	1.1082	1.39947	0.00108	-2.332	Testing	-2.44347	0.00462675	-0.573976
[Ch]Cl-1,2-butanediol (1 : 4)	313.15	388.3	0.0016	0.22732	0.91411	2.58649	5.22108	2.2261	0.74201	1.1082	1.39947	0.00108	-4.5564	Training	-4.49205	0.00311208	-0.448067
[Ch]Cl-1,2-butanediol (1 : 4)	313.15	835.8	0.0016	0.22732	0.91411	2.58649	5.22108	2.2261	0.74201	1.1082	1.39947	0.00108	-3.7898	Training	-3.74291	0.00268012	-1.84746
[Ch]Cl-1,2-butanediol (1 : 4)	313.15	1285.5	0.0016	0.22732	0.91411	2.58649	5.22108	2.2261	0.74201	1.1082	1.39947	0.00108	-3.3524	Training	-3.32147	0.00254887	-1.37914
[Ch]Cl-1,2-butanediol (1 : 4)	313.15	1729.8	0.0016	0.22732	0.91411	2.58649	5.22108	2.2261	0.74201	1.1082	1.39947	0.00108	-3.0018	Training	-3.05215	0.0027173	-0.904507
[Ch]Cl-1,2-butanediol (1 : 4)	313.15	2186	0.0016	0.22732	0.91411	2.58649	5.22108	2.2261	0.74201	1.1082	1.39947	0.00108	-2.7855	Training	-2.83406	0.00319858	-0.756903
[Ch]Cl-1,2-butanediol (1 : 4)	313.15	2644.3	0.0016	0.22732	0.91411	2.58649	5.22108	2.2261	0.74201	1.1082	1.39947	0.00108	-2.6064	Testing	-2.63533	0.00399663	-0.721143
[Ch]Cl-1,2-butanediol (1 : 4)	313.15	3125	0.0016	0.22732	0.91411	2.58649	5.22108	2.2261	0.74201	1.1082	1.39947	0.00108	-2.4511	Testing	-2.44426	0.00517247	-0.73699
[Ch]Cl-1,2-butanediol (1 : 4)	323.15	404.5	0.0016	0.22732	0.91411	2.58649	5.22108	2.2261	0.74201	1.1082	1.39947	0.00108	-4.6565	Training	-4.6106	0.00367929	-0.359036
[Ch]Cl-1,2-butanediol (1 : 4)	323.15	871.5	0.0016	0.22732	0.91411	2.58649	5.22108	2.2261	0.74201	1.1082	1.39947	0.00108	-3.8922	Testing	-3.85674	0.00319073	-1.90239
[Ch]Cl-1,2-butanediol (1 : 4)	323.15	1343.3	0.0016	0.22732	0.91411	2.58649	5.22108	2.2261	0.74201	1.1082	1.39947	0.00108	-3.4609	Training	-3.42814	0.00302959	-1.43231
[Ch]Cl-1,2-butanediol (1 : 4)	323.15	1808.8	0.0016	0.22732	0.91411	2.58649	5.22108	2.2261	0.74201	1.1082	1.39947	0.00108	-3.0944	Training	-3.1433	0.00319807	-0.936989
[Ch]Cl-1,2-butanediol (1 : 4)	323.15	2289	0.0016	0.22732	0.91411	2.58649	5.22108	2.2261	0.74201	1.1082	1.39947	0.00108	-2.8735	Training	-2.90076	0.00371271	-0.797649
[Ch]Cl-1,2-butanediol (1 : 4)	323.15	2775	0.0016	0.22732	0.91411	2.58649	5.22108	2.2261	0.74201	1.1082	1.39947	0.00108	-2.7016	Training	-2.6779	0.00458599	-0.778791
[Ch]Cl-1,2-butanediol (1 : 4)	323.15	3285.3	0.0016	0.22732	0.91411	2.58649	5.22108	2.2261	0.74201	1.1082	1.39947	0.00108	-2.5396	Training	-2.47194	0.00588453	-0.802719
[Ch]Cl-1,2-butanediol (1 : 4)	333.15	420.5	0.0016	0.22732	0.91411	2.58649	5.22108	2.2261	0.74201	1.1082	1.39947	0.00108	-4.756	Training	-4.74648	0.00443067	-0.267151
[Ch]Cl-1,2-butanediol (1 : 4)	333.15	907	0.0016	0.22732	0.91411	2.58649	5.22108	2.2261	0.74201	1.1082	1.39947	0.00108	-3.99	Testing	-3.98519	0.00388221	-1.94559
[Ch]Cl-1,2-butanediol (1 : 4)	333.15	1399.8	0.0016	0.22732	0.91411	2.58649	5.22108	2.2261	0.74201	1.1082	1.39947	0.00108	-3.5614	Training	-3.54848	0.00368886	-1.46553
[Ch]Cl-1,2-butanediol (1 : 4)	333.15	1886.3	0.0016	0.22732	0.91411	2.58649	5.22108	2.2261	0.74201	1.1082	1.39947	0.00108	-3.1749	Testing	-3.24714	0.00385556	-0.957154
[Ch]Cl-1,2-butanediol (1 : 4)	333.15	2391.8	0.0016	0.22732	0.91411	2.58649	5.22108	2.2261	0.74201	1.1082	1.39947	0.00108	-2.9642	Training	-2.98136	0.00440513	-0.84462
[Ch]Cl-1,2-butanediol (1 : 4)	333.15	2903.8	0.0016	0.22732	0.91411	2.58649	5.22108	2.2261	0.74201	1.1082	1.39947	0.00108	-2.7887	Training	-2.73992	0.00535278	-0.837984
[Ch]Cl-1,2-butanediol (1 : 4)	333.15	3443.3	0.0016	0.22732	0.91411	2.58649	5.22108	2.2261	0.74201	1.1082	1.39947	0.00108	-2.6228	Testing	-2.52606	0.00677709	-0.894717
[Ch]Cl-DEG (1 : 4)	303.15	524.2	0	0.11608	1.01195	3.73249	5.44256	1.30326	0.84497	1.50136	1.65147	0.00076	-4.0804	Training	-4.0464	0.00351327	-0.764744
[Ch]Cl-DEG (1 : 4)	303.15	617.3	0	0.11608	1.01195	3.73249	5.44256	1.30326	0.84497	1.50136	1.65147	0.00076	-3.917	Training	-3.88023	0.00348179	-1.04663
[Ch]Cl-DEG (1 : 4)	303.15	726.5	0	0.11608	1.01195	3.73249	5.44256	1.30326	0.84497	1.50136	1.65147	0.00076	-3.7508	Training	-3.71068	0.00346144	-1.43745
[Ch]Cl-DEG (1 : 4)	303.15	846.3	0	0.11608	1.01195	3.73249	5.44256	1.30326	0.84497	1.50136	1.65147	0.00076	-3.5972	Training	-3.54846	0.00345971	-1.77281
[Ch]Cl-DEG (1 : 4)	303.15	924.3	0	0.11608	1.01195	3.73249	5.44256	1.30326	0.84497	1.50136	1.65147	0.00076	-3.5099	Training	-3.45466	0.00347016	-1.62861
[Ch]Cl-DEG (1 : 4)	303.15	1032.2	0	0.11608	1.01195	3.73249	5.44256	1.30326	0.84497	1.50136	1.65147	0.00076	-3.4022	Testing	-3.33933	0.00349967	-1.46728
[Ch]Cl-DEG (1 : 4)	303.15	1119.7	0	0.11608	1.01195	3.73249	5.44256	1.30326	0.84497	1.50136	1.65147	0.00076	-3.3215	Testing	-3.25744	0.00353644	-1.34863
[TBA]Br-EG (1 : 4)	303.15	542.8	0	0.31344	0.70746	2.85855	5.69779	2.46526	0.62677	1.00233	1.53821	0.00159	-3.9739	Testing	-4.02784	0.0041411	-0.704552
[TBA]Br-EG (1 : 4)	303.15	669.5	0	0.31344	0.70746	2.85855	5.69779	2.46526	0.62677	1.00233	1.53821	0.00159	-3.7132	Training	-3.78941	0.00400977	-0.974999
[TBA]Br-EG (1 : 4)	303.15	802.1	0	0.31344	0.70746	2.85855	5.69779	2.46526	0.62677	1.00233	1.53821	0.00159	-3.5336	Testing	-3.5766	0.00389813	-1.50854
[TBA]Br-EG (1 : 4)	303.15	832.5	0	0.31344	0.70746	2.85855	5.69779	2.46526	0.62677	1.00233	1.53821	0.00159	-3.4802	Training	-3.53187	0.00387626	-1.59403
[TBA]Br-EG (1 : 4)	303.15	1075.9	0	0.31344	0.70746	2.85855	5.69779	2.46526	0.62677	1.00233	1.53821	0.00159	-3.234	Training	-3.21699	0.00375113	-1.21848
[TBA]Br-EG (1 : 4)	303.15	1374.2	0	0.31344	0.70746	2.85855	5.69779	2.46526	0.62677	1.00233	1.53821	0.00159	-3.0038	Testing	-2.91101	0.00371907	-0.930115
[TBA]Br-DEG (1 : 4)	303.15	590	0	0.11608	0.7643	3.48227	8.29519	2.88174	0.73609	1.38877	1.67321	0.00159	-3.0555	Training	-2.97553	0.00348777	0.592361
[TBA]Br-DEG (1 : 4)	303.15	639.9	0	0.11608	0.7643	3.48227	8.29519	2.88174	0.73609	1.38877	1.67321	0.00159	-2.9898	Training	-2.88373	0.00348588	0.389544
[TBA]Br-DEG (1 : 4)	303.15	756.9	0	0.11608	0.7643	3.48227	8.29519	2.88174	0.73609	1.38877	1.67321	0.00159	-2.8184	Training	-2.68812	0.0034961	-0.0449679
[TBA]Br-DEG (1 : 4)	303.15	908.8	0	0.11608	0.7643	3.48227	8.29519	2.88174	0.73609	1.38877	1.67321	0.00159	-2.5396	Testing	-2.46683	0.00354003	0.117603
[TBA]Br-DEG (1 : 4)	303.15	1047.7	0	0.11608	0.7643	3.48227	8.29519	2.88174	0.73609	1.38877	1.67321	0.00159	-2.4113	Testing	-2.29129	0.00361051	0.306406
[TBA]Br-methyldiethanol amine (1 : 4)	303.15	502.5	0	0.00444	0.47446	3.43975	9.69983	3.21194	0.66565	1.05441	1.74861	0.00407	-2.2082	Testing	-2.27175	0.00702297	2.84458
[TBA]Br-methyldiethanol amine (1 : 4)	303.15	664.3	0	0.00444	0.47446	3.43975	9.69983	3.21194	0.66565	1.05441	1.74861	0.00407	-1.9555	Testing	-1.99985	0.00706803	2.2918
[TBA]Br-methyldiethanol amine (1 : 4)	303.15	711.9	0	0.00444	0.47446	3.43975	9.69983	3.21194	0.66565	1.05441	1.74861	0.00407	-1.7832	Training	-1.93168	0.00708876	2.44006
[TBA]Br-methyldiethanol amine (1 : 4)	303.15	834	0	0.00444	0.47446	3.43975	9.69983	3.21194	0.66565	1.05441	1.74861	0.00407	-1.6756	Testing	-1.77488	0.00715751	1.91582
[TBA]Br-methyldiethanol amine (1 : 4)	303.15	904	0	0.00444	0.47446	3.43975	9.69983	3.21194	0.66565	1.05441	1.74861	0.00407	-1.6005	Testing	-1.69517	0.00720701	2.03518
[TBA]Br-methyldiethanol amine (1 : 4)	303.15	1021	0	0.00444	0.47446	3.43975	9.69983	3.21194	0.66565	1.05441	1.74861	0.00407	-1.4908	Training	-1.57636	0.00730617	2.27863
[Ch]Cl-Guaiacol (1 : 4)	293.15	52.1	0	0.18016	0.58499	4.36849	3.7234	3.16958	2.72345	0.85724	0.74939	0.00076	-6.1193	Training	-6.0634	0.0045186	-1.48012
[Ch]Cl-Guaiacol (1 : 4)	293.15	143.2	0	0.18016	0.58499	4.36849	3.7234	3.16958	2.72345	0.85724	0.74939	0.00076	-5.116	Testing	-5.25512	0.0044837	-0.758749
[Ch]Cl-Guaiacol (1 : 4)	293.15	231.9	0	0.18016	0.58499	4.36849	3.7234	3.16958	2.72345	0.85724	0.74939	0.00076	-4.6356	Training	-4.68148	0.00446168	-0.872183
[Ch]Cl-Guaiacol (1 : 4)	293.15	326.5	0	0.18016	0.58499	4.36849	3.7234	3.16958	2.72345	0.85724	0.74939	0.00076	-4.2977	Training	-4.2767	0.00445121	-0.752243
[Ch]Cl-Guaiacol (1 : 4)	293.15	430	0	0.18016	0.58499	4.36849	3.7234	3.16958	2.72345	0.85724	0.74939	0.00076	-4.0174	Training	-3.99525	0.00445515	-0.832373
[Ch]Cl-Guaiacol (1 : 4)	293.15	526	0	0.18016	0.58499	4.36849	3.7234	3.16958	2.72345	0.85724	0.74939	0.00076	-3.8122	Training	-3.8164	0.00447318	-1.03624
[Ch]Cl-Guaiacol (1 : 4)	303.15	100.3	0	0.18016	0.58499	4.36849	3.7234	3.16958	2.72345	0.85724	0.74939	0.00076	-5.655	Training	-5.73893	0.0042399	-0.73388
[Ch]Cl-Guaiacol (1 : 4)	303.15	151.3	0	0.18016	0.58499	4.36849	3.7234	3.16958	2.72345	0.85724	0.74939	0.00076	-5.2214	Testing	-5.32845	0.00421641	-0.644584
[Ch]Cl-Guaiacol (1 : 4)	303.15	264.2	0	0.18016	0.58499	4.36849	3.7234	3.16958	2.72345	0.85724	0.74939	0.00076	-4.667	Testing	-4.66992	0.00417828	-0.757755
[Ch]Cl-Guaiacol (1 : 4)	303.15	341.7	0	0.18016	0.58499	4.36849	3.7234	3.16958	2.72345	0.85724	0.74939	0.00076	-4.4145	Testing	-4.38236	0.00416318	-0.717799
[Ch]Cl-Guaiacol (1 : 4)	303.15	437.4	0	0.18016	0.58499	4.36849	3.7234	3.16958	2.72345	0.85724	0.74939	0.00076	-4.1605	Testing	-4.14385	0.00415697	-0.802435
[Ch]Cl-Guaiacol (1 : 4)	303.15	545.9	0	0.18016	0.58499	4.36849	3.7234	3.16958	2.72345	0.85724	0.74939	0.00076	-3.9425	Training	-3.95851	0.00416657	-1.04517
[Ch]Cl-Guaiacol (1 : 4)	313.15	53.4	0	0.18016	0.58499	4.36849	3.7234	3.16958	2.72345	0.85724	0.74939	0.00076	-6.5713	Testing	-6.28372	0.00419926	-1.55651
[Ch]Cl-Guaiacol (1 : 4)	313.15	142.5	0	0.18016	0.58499	4.36849	3.7234	3.16958	2.72345	0.85724	0.74939	0.00076	-5.4262	Training	-5.51443	0.00414381	-0.437144
[Ch]Cl-Guaiacol (1 : 4)	313.15	235.9	0	0.18016	0.58499	4.36849	3.7234	3.16958	2.72345	0.85724	0.74939	0.00076	-4.9337	Training	-4.93598	0.00409847	-0.721755
[Ch]Cl-Guaiacol (1 : 4)	313.15	335.5	0	0.18016	0.58499	4.36849	3.7234	3.16958	2.72345	0.85724	0.74939	0.00076	-4.5756	Testing	-4.54358	0.00406455	-0.614293
[Ch]Cl-Guaiacol (1 : 4)	313.15	431.8	0	0.18016	0.58499	4.36849	3.7234	3.16958	2.72345	0.85724	0.74939	0.00076	-4.3275	Testing	-4.30654	0.00404591	-0.716826
[Ch]Cl-Guaiacol (1 : 4)	313.15	542.9	0	0.18016	0.58499	4.36849	3.7234	3.16958	2.72345	0.85724	0.74939	0.00076	-4.1044	Testing	-4.12346	0.0040417	-0.981453
[Ch]Cl-Guaiacol (1 : 4)	323.15	54.7	0	0.18016	0.58499	4.36849	3.7234	3.16958	2.72345	0.85724	0.74939	0.00076	-6.5713	Testing	-6.36761	0.00431988	-1.07879
[Ch]Cl-Guaiacol (1 : 4)	323.15	143.6	0	0.18016	0.58499	4.36849	3.7234	3.16958	2.72345	0.85724	0.74939	0.00076	-5.5728	Training	-5.61264	0.00425405	-0.292908
[Ch]Cl-Guaiacol (1 : 4)	323.15	238.5	0	0.18016	0.58499	4.36849	3.7234	3.16958	2.72345	0.85724	0.74939	0.00076	-5.0672	Training	-5.03997	0.00419687	-0.614081
[Ch]Cl-Guaiacol (1 : 4)	323.15	336.7	0	0.18016	0.58499	4.36849	3.7234	3.16958	2.72345	0.85724	0.74939	0.00076	-4.7105	Training	-4.66654	0.00415194	-0.475529
[Ch]Cl-Guaiacol (1 : 4)	323.15	435.2	0	0.18016	0.58499	4.36849	3.7234	3.16958	2.72345	0.85724	0.74939	0.00076	-4.4568	Testing	-4.43498	0.00412141	-0.607159
[Ch]Cl-Guaiacol (1 : 4)	323.15	535.3	0	0.18016	0.58499	4.36849	3.7234	3.16958	2.72345	0.85724	0.74939	0.00076	-4.2616	Training	-4.27673	0.00410531	-0.839603
DiethylammoniumCl-Guaiacol (1 : 4)	293.15	49.6	0.15301	0.38825	0.3825	4.13711	3.89222	3.27251	2.59248	0.55748	0.9567	0.12354	-5.9915	Training	-5.87357	0.0118366	-0.945846
DiethylammoniumCl-Guaiacol (1 : 4)	293.15	134.6	0.15301	0.38825	0.3825	4.13711	3.89222	3.27251	2.59248	0.55748	0.9567	0.12354	-5.0056	Training	-5.12104	0.0118178	-0.135052
DiethylammoniumCl-Guaiacol (1 : 4)	293.15	224.4	0.15301	0.38825	0.3825	4.13711	3.89222	3.27251	2.59248	0.55748	0.9567	0.12354	-4.5008	Training	-4.53356	0.0118097	-0.309934
DiethylammoniumCl-Guaiacol (1 : 4)	293.15	323.1	0.15301	0.38825	0.3825	4.13711	3.89222	3.27251	2.59248	0.55748	0.9567	0.12354	-4.1414	Training	-4.11296	0.0118148	-0.168587
DiethylammoniumCl-Guaiacol (1 : 4)	293.15	411.3	0.15301	0.38825	0.3825	4.13711	3.89222	3.27251	2.59248	0.55748	0.9567	0.12354	-3.8873	Testing	-3.87249	0.0118317	-0.232835
DiethylammoniumCl-Guaiacol (1 : 4)	293.15	516.1	0.15301	0.38825	0.3825	4.13711	3.89222	3.27251	2.59248	0.55748	0.9567	0.12354	-3.6535	Testing	-3.67813	0.0118669	-0.428328
DiethylammoniumCl-Guaiacol (1 : 4)	303.15	61.7	0.15301	0.38825	0.3825	4.13711	3.89222	3.27251	2.59248	0.55748	0.9567	0.12354	-5.8781	Testing	-5.87924	0.0117187	-0.412005
DiethylammoniumCl-Guaiacol (1 : 4)	303.15	142.6	0.15301	0.38825	0.3825	4.13711	3.89222	3.27251	2.59248	0.55748	0.9567	0.12354	-5.0672	Testing	-5.18721	0.0116924	0.0491167
DiethylammoniumCl-Guaiacol (1 : 4)	303.15	227.5	0.15301	0.38825	0.3825	4.13711	3.89222	3.27251	2.59248	0.55748	0.9567	0.12354	-4.6052	Training	-4.64908	0.0116752	-0.137044
DiethylammoniumCl-Guaiacol (1 : 4)	303.15	345.8	0.15301	0.38825	0.3825	4.13711	3.89222	3.27251	2.59248	0.55748	0.9567	0.12354	-4.1865	Testing	-4.17775	0.0116694	-0.0321709
DiethylammoniumCl-Guaiacol (1 : 4)	303.15	425.4	0.15301	0.38825	0.3825	4.13711	3.89222	3.27251	2.59248	0.55748	0.9567	0.12354	-3.9846	Training	-3.97971	0.0116774	-0.0901241
DiethylammoniumCl-Guaiacol (1 : 4)	303.15	524.8	0.15301	0.38825	0.3825	4.13711	3.89222	3.27251	2.59248	0.55748	0.9567	0.12354	-3.7766	Training	-3.80302	0.0117006	-0.311774
DiethylammoniumCl-Guaiacol (1 : 4)	313.15	54.2	0.15301	0.38825	0.3825	4.13711	3.89222	3.27251	2.59248	0.55748	0.9567	0.12354	-6.2146	Training	-6.07357	0.0117954	-0.534554
DiethylammoniumCl-Guaiacol (1 : 4)	313.15	141.1	0.15301	0.38825	0.3825	4.13711	3.89222	3.27251	2.59248	0.55748	0.9567	0.12354	-5.24	Training	-5.32563	0.0117561	0.215539
DiethylammoniumCl-Guaiacol (1 : 4)	313.15	242.2	0.15301	0.38825	0.3825	4.13711	3.89222	3.27251	2.59248	0.55748	0.9567	0.12354	-4.7105	Testing	-4.70641	0.0117246	-0.0844984
DiethylammoniumCl-Guaiacol (1 : 4)	313.15	346.8	0.15301	0.38825	0.3825	4.13711	3.89222	3.27251	2.59248	0.55748	0.9567	0.12354	-4.3428	Testing	-4.30903	0.0117082	0.0317982
DiethylammoniumCl-Guaiacol (1 : 4)	313.15	431.8	0.15301	0.38825	0.3825	4.13711	3.89222	3.27251	2.59248	0.55748	0.9567	0.12354	-4.1227	Testing	-4.10148	0.0117069	-0.0561253
DiethylammoniumCl-Guaiacol (1 : 4)	313.15	529.2	0.15301	0.38825	0.3825	4.13711	3.89222	3.27251	2.59248	0.55748	0.9567	0.12354	-3.917	Training	-3.9309	0.0117188	-0.233333
DiethylammoniumCl-Guaiacol (1 : 4)	323.15	58.9	0.15301	0.38825	0.3825	4.13711	3.89222	3.27251	2.59248	0.55748	0.9567	0.12354	-6.2659	Testing	-6.14654	0.0120535	-0.260805
DiethylammoniumCl-Guaiacol (1 : 4)	323.15	148.4	0.15301	0.38825	0.3825	4.13711	3.89222	3.27251	2.59248	0.55748	0.9567	0.12354	-5.2983	Testing	-5.39304	0.0120031	0.412752
DiethylammoniumCl-Guaiacol (1 : 4)	323.15	230.1	0.15301	0.38825	0.3825	4.13711	3.89222	3.27251	2.59248	0.55748	0.9567	0.12354	-4.8796	Training	-4.89052	0.0119676	0.0794688
DiethylammoniumCl-Guaiacol (1 : 4)	323.15	337.7	0.15301	0.38825	0.3825	4.13711	3.89222	3.27251	2.59248	0.55748	0.9567	0.12354	-4.483	Training	-4.46165	0.0119361	0.244892
DiethylammoniumCl-Guaiacol (1 : 4)	323.15	430.4	0.15301	0.38825	0.3825	4.13711	3.89222	3.27251	2.59248	0.55748	0.9567	0.12354	-4.2405	Training	-4.22956	0.0119229	0.152905
DiethylammoniumCl-Guaiacol (1 : 4)	323.15	526.8	0.15301	0.38825	0.3825	4.13711	3.89222	3.27251	2.59248	0.55748	0.9567	0.12354	-4.0456	Training	-4.05835	0.0119228	-0.078186
[Ach]Cl-Guaiacol (1 : 4)	293.15	55.1	0	0.18016	0.58442	4.43994	4.27675	3.28794	2.76351	0.94932	0.72817	0.00265	-5.9522	Training	-5.85758	0.00568056	-1.27711
[Ach]Cl-Guaiacol (1 : 4)	293.15	138.4	0	0.18016	0.58442	4.43994	4.27675	3.28794	2.76351	0.94932	0.72817	0.00265	-4.9908	Testing	-5.11855	0.00565111	-0.520071
[Ach]Cl-Guaiacol (1 : 4)	293.15	227.6	0	0.18016	0.58442	4.43994	4.27675	3.28794	2.76351	0.94932	0.72817	0.00265	-4.5008	Testing	-4.53401	0.00563111	-0.693549
[Ach]Cl-Guaiacol (1 : 4)	293.15	326.4	0	0.18016	0.58442	4.43994	4.27675	3.28794	2.76351	0.94932	0.72817	0.00265	-4.1477	Training	-4.1096	0.00562291	-0.54505
[Ach]Cl-Guaiacol (1 : 4)	293.15	422.1	0	0.18016	0.58442	4.43994	4.27675	3.28794	2.76351	0.94932	0.72817	0.00265	-3.8873	Testing	-3.84743	0.00562893	-0.640083
[Ach]Cl-Guaiacol (1 : 4)	293.15	524.9	0	0.18016	0.58442	4.43994	4.27675	3.28794	2.76351	0.94932	0.72817	0.00265	-3.6809	Testing	-3.65475	0.00565072	-0.885016
[Ach]Cl-Guaiacol (1 : 4)	303.15	54.8	0	0.18016	0.58442	4.43994	4.27675	3.28794	2.76351	0.94932	0.72817	0.00265	-6.1193	Training	-5.9672	0.0054314	-1.1563
[Ach]Cl-Guaiacol (1 : 4)	303.15	140.6	0	0.18016	0.58442	4.43994	4.27675	3.28794	2.76351	0.94932	0.72817	0.00265	-5.185	Training	-5.21808	0.0053909	-0.481818
[Ach]Cl-Guaiacol (1 : 4)	303.15	263.7	0	0.18016	0.58442	4.43994	4.27675	3.28794	2.76351	0.94932	0.72817	0.00265	-4.5282	Testing	-4.48624	0.0053521	-0.577776
[Ach]Cl-Guaiacol (1 : 4)	303.15	338.6	0	0.18016	0.58442	4.43994	4.27675	3.28794	2.76351	0.94932	0.72817	0.00265	-4.2759	Training	-4.20834	0.00533961	-0.493749
[Ach]Cl-Guaiacol (1 : 4)	303.15	431.8	0	0.18016	0.58442	4.43994	4.27675	3.28794	2.76351	0.94932	0.72817	0.00265	-4.0342	Training	-3.97407	0.00533584	-0.591217
[Ach]Cl-Guaiacol (1 : 4)	303.15	558.6	0	0.18016	0.58442	4.43994	4.27675	3.28794	2.76351	0.94932	0.72817	0.00265	-3.781	Training	-3.76161	0.00535165	-0.90266
[Ach]Cl-Guaiacol (1 : 4)	313.15	55.5	0	0.18016	0.58442	4.43994	4.27675	3.28794	2.76351	0.94932	0.72817	0.00265	-6.1193	Training	-6.05659	0.00536902	-0.658286
[Ach]Cl-Guaiacol (1 : 4)	313.15	140.8	0	0.18016	0.58442	4.43994	4.27675	3.28794	2.76351	0.94932	0.72817	0.00265	-5.24	Training	-5.32298	0.00531859	-0.104905
[Ach]Cl-Guaiacol (1 : 4)	313.15	235.8	0	0.18016	0.58442	4.43994	4.27675	3.28794	2.76351	0.94932	0.72817	0.00265	-4.733	Training	-4.73613	0.00527528	-0.394687
[Ach]Cl-Guaiacol (1 : 4)	313.15	330.2	0	0.18016	0.58442	4.43994	4.27675	3.28794	2.76351	0.94932	0.72817	0.00265	-4.4063	Testing	-4.36294	0.00524566	-0.329838
[Ach]Cl-Guaiacol (1 : 4)	313.15	438.8	0	0.18016	0.58442	4.43994	4.27675	3.28794	2.76351	0.94932	0.72817	0.00265	-4.1289	Testing	-4.09891	0.00522814	-0.451005
[Ach]Cl-Guaiacol (1 : 4)	313.15	531.5	0	0.18016	0.58442	4.43994	4.27675	3.28794	2.76351	0.94932	0.72817	0.00265	-3.9373	Training	-3.9481	0.00522719	-0.635721
[Ach]Cl-Guaiacol (1 : 4)	323.15	53	0	0.18016	0.58442	4.43994	4.27675	3.28794	2.76351	0.94932	0.72817	0.00265	-6.3771	Testing	-6.1671	0.00549631	-0.734529
[Ach]Cl-Guaiacol (1 : 4)	323.15	165.3	0	0.18016	0.58442	4.43994	4.27675	3.28794	2.76351	0.94932	0.72817	0.00265	-5.24	Testing	-5.24752	0.00541832	-0.0678598
[Ach]Cl-Guaiacol (1 : 4)	323.15	241.6	0	0.18016	0.58442	4.43994	4.27675	3.28794	2.76351	0.94932	0.72817	0.00265	-4.8536	Training	-4.81584	0.00537612	-0.27948
[Ach]Cl-Guaiacol (1 : 4)	323.15	339.3	0	0.18016	0.58442	4.43994	4.27675	3.28794	2.76351	0.94932	0.72817	0.00265	-4.519	Training	-4.45338	0.00533485	-0.189593
[Ach]Cl-Guaiacol (1 : 4)	323.15	437.4	0	0.18016	0.58442	4.43994	4.27675	3.28794	2.76351	0.94932	0.72817	0.00265	-4.2545	Training	-4.22853	0.00530783	-0.268322
[Ach]Cl-Guaiacol (1 : 4)	323.15	536	0	0.18016	0.58442	4.43994	4.27675	3.28794	2.76351	0.94932	0.72817	0.00265	-4.057	Training	-4.07652	0.00529523	-0.509056
[TBP]Br-Phenol (1 : 4)	313.15	234.5	0.03864	0.44244	0.26119	3.16577	5.8873	4.52008	2.34969	0.77516	0.69415	0	-3.537	Training	-3.51075	0.00521607	2.20013
[TBP]Br-Phenol (1 : 4)	313.15	463.6	0.03864	0.44244	0.26119	3.16577	5.8873	4.52008	2.34969	0.77516	0.69415	0	-2.9394	Testing	-2.79743	0.00512094	1.89416
[TBP]Br-Phenol (1 : 4)	313.15	737	0.03864	0.44244	0.26119	3.16577	5.8873	4.52008	2.34969	0.77516	0.69415	0	-2.3507	Training	-2.34464	0.00511053	1.39832
[TBP]Br-Phenol (1 : 4)	313.15	932	0.03864	0.44244	0.26119	3.16577	5.8873	4.52008	2.34969	0.77516	0.69415	0	-2.0939	Testing	-2.07263	0.00517165	0.994211
[TBP]Br-Phenol (1 : 4)	313.15	1188.8	0.03864	0.44244	0.26119	3.16577	5.8873	4.52008	2.34969	0.77516	0.69415	0	-1.8496	Testing	-1.76012	0.00533923	1.35972
[TBP]Br-Phenol (1 : 4)	313.15	1578.5	0.03864	0.44244	0.26119	3.16577	5.8873	4.52008	2.34969	0.77516	0.69415	0	-1.5857	Testing	-1.43472	0.00578262	1.66676
[TBP]Br-Phenol (1 : 4)	323.15	163.8	0.03864	0.44244	0.26119	3.16577	5.8873	4.52008	2.34969	0.77516	0.69415	0	-3.9739	Testing	-4.07927	0.00512892	2.67089
[TBP]Br-Phenol (1 : 4)	323.15	399	0.03864	0.44244	0.26119	3.16577	5.8873	4.52008	2.34969	0.77516	0.69415	0	-3.2189	Testing	-3.11023	0.00497919	2.13416
[TBP]Br-Phenol (1 : 4)	323.15	608.4	0.03864	0.44244	0.26119	3.16577	5.8873	4.52008	2.34969	0.77516	0.69415	0	-2.6897	Training	-2.70198	0.00491575	1.9618
[TBP]Br-Phenol (1 : 4)	323.15	786.9	0.03864	0.44244	0.26119	3.16577	5.8873	4.52008	2.34969	0.77516	0.69415	0	-2.3903	Testing	-2.42938	0.00491364	1.32534
[TBP]Br-Phenol (1 : 4)	323.15	1018.7	0.03864	0.44244	0.26119	3.16577	5.8873	4.52008	2.34969	0.77516	0.69415	0	-2.0899	Testing	-2.11111	0.00498229	1.18027
[TBP]Br-Phenol (1 : 4)	323.15	1241.2	0.03864	0.44244	0.26119	3.16577	5.8873	4.52008	2.34969	0.77516	0.69415	0	-1.8951	Training	-1.85261	0.00512405	1.52368
[TBP]Br-Phenol (1 : 4)	333.15	203.4	0.03864	0.44244	0.26119	3.16577	5.8873	4.52008	2.34969	0.77516	0.69415	0	-3.9954	Training	-4.0236	0.0051481	2.51243
[TBP]Br-Phenol (1 : 4)	333.15	481.2	0.03864	0.44244	0.26119	3.16577	5.8873	4.52008	2.34969	0.77516	0.69415	0	-3.1869	Training	-3.10367	0.00496335	2.14118
[TBP]Br-Phenol (1 : 4)	333.15	601.7	0.03864	0.44244	0.26119	3.16577	5.8873	4.52008	2.34969	0.77516	0.69415	0	-2.8387	Testing	-2.88348	0.00491923	2.02244
[TBP]Br-Phenol (1 : 4)	333.15	856	0.03864	0.44244	0.26119	3.16577	5.8873	4.52008	2.34969	0.77516	0.69415	0	-2.4236	Training	-2.49127	0.00489766	1.2558
[TBP]Br-Phenol (1 : 4)	333.15	1024.7	0.03864	0.44244	0.26119	3.16577	5.8873	4.52008	2.34969	0.77516	0.69415	0	-2.1568	Training	-2.25945	0.00493691	1.32704
[TBP]Br-Phenol (1 : 4)	333.15	1272.9	0.03864	0.44244	0.26119	3.16577	5.8873	4.52008	2.34969	0.77516	0.69415	0	-1.9449	Training	-1.97167	0.00507232	1.63012
[TBP]Br-DEG (1 : 4)	313.15	183.5	0	0.11608	0.72243	3.35281	8.6597	2.93296	0.73733	1.45512	1.60031	0	-3.7465	Testing	-3.74502	0.0041968	2.45092
[TBP]Br-DEG (1 : 4)	313.15	379.8	0	0.11608	0.72243	3.35281	8.6597	2.93296	0.73733	1.45512	1.60031	0	-3.0303	Testing	-2.97544	0.00409379	2.3806
[TBP]Br-DEG (1 : 4)	313.15	621.6	0	0.11608	0.72243	3.35281	8.6597	2.93296	0.73733	1.45512	1.60031	0	-2.4225	Training	-2.45187	0.00404641	2.16647
[TBP]Br-DEG (1 : 4)	313.15	892.3	0	0.11608	0.72243	3.35281	8.6597	2.93296	0.73733	1.45512	1.60031	0	-2.0212	Testing	-2.03745	0.00409749	1.44595
[TBP]Br-DEG (1 : 4)	313.15	1024.5	0	0.11608	0.72243	3.35281	8.6597	2.93296	0.73733	1.45512	1.60031	0	-1.8534	Training	-1.87038	0.00416241	1.80286
[TBP]Br-DEG (1 : 4)	313.15	1398.1	0	0.11608	0.72243	3.35281	8.6597	2.93296	0.73733	1.45512	1.60031	0	-1.5498	Training	-1.48477	0.00448771	2.22275
[TBP]Br-DEG (1 : 4)	323.15	94.4	0	0.11608	0.72243	3.35281	8.6597	2.93296	0.73733	1.45512	1.60031	0	-4.3428	Training	-4.40172	0.0040069	3.23087
[TBP]Br-DEG (1 : 4)	323.15	270.7	0	0.11608	0.72243	3.35281	8.6597	2.93296	0.73733	1.45512	1.60031	0	-3.5649	Testing	-3.40009	0.00386703	2.34241
[TBP]Br-DEG (1 : 4)	323.15	464.2	0	0.11608	0.72243	3.35281	8.6597	2.93296	0.73733	1.45512	1.60031	0	-2.752	Training	-2.82619	0.00376722	2.95912
[TBP]Br-DEG (1 : 4)	323.15	700.8	0	0.11608	0.72243	3.35281	8.6597	2.93296	0.73733	1.45512	1.60031	0	-2.3289	Training	-2.37699	0.00372155	2.2613
[TBP]Br-DEG (1 : 4)	323.15	895.4	0	0.11608	0.72243	3.35281	8.6597	2.93296	0.73733	1.45512	1.60031	0	-2.0433	Testing	-2.08799	0.00374697	1.63686
[TBP]Br-DEG (1 : 4)	323.15	1148	0	0.11608	0.72243	3.35281	8.6597	2.93296	0.73733	1.45512	1.60031	0	-1.7856	Testing	-1.77712	0.00386475	2.03672
[TBP]Br-DEG (1 : 4)	333.15	164.8	0	0.11608	0.72243	3.35281	8.6597	2.93296	0.73733	1.45512	1.60031	0	-4.0804	Training	-4.00747	0.00386863	3.10268
[TBP]Br-DEG (1 : 4)	333.15	397.4	0	0.11608	0.72243	3.35281	8.6597	2.93296	0.73733	1.45512	1.60031	0	-3.1869	Testing	-3.07226	0.00369062	2.76038
[TBP]Br-DEG (1 : 4)	333.15	642.3	0	0.11608	0.72243	3.35281	8.6597	2.93296	0.73733	1.45512	1.60031	0	-2.5601	Testing	-2.5493	0.00359097	2.49003
[TBP]Br-DEG (1 : 4)	333.15	903.8	0	0.11608	0.72243	3.35281	8.6597	2.93296	0.73733	1.45512	1.60031	0	-2.1312	Training	-2.14161	0.00358395	1.74121
[TBP]Br-DEG (1 : 4)	333.15	1103.6	0	0.11608	0.72243	3.35281	8.6597	2.93296	0.73733	1.45512	1.60031	0	-1.8878	Training	-1.88399	0.00364777	2.15737
[TBP]Br-DEG (1 : 4)	333.15	1396.5	0	0.11608	0.72243	3.35281	8.6597	2.93296	0.73733	1.45512	1.60031	0	-1.6327	Training	-1.56398	0.00384963	2.52694
[ATPP]Br-Phenol (1 : 4)	313.15	218.2	0.03864	0.44244	0.33124	3.87525	3.95697	5.02433	2.52818	0.739	0.60583	0.0118	-3.5066	Training	-3.44159	0.00724957	2.64577
[ATPP]Br-Phenol (1 : 4)	313.15	397.4	0.03864	0.44244	0.33124	3.87525	3.95697	5.02433	2.52818	0.739	0.60583	0.0118	-2.8002	Testing	-2.71356	0.00709213	2.93439
[ATPP]Br-Phenol (1 : 4)	313.15	631.6	0.03864	0.44244	0.33124	3.87525	3.95697	5.02433	2.52818	0.739	0.60583	0.0118	-2.3076	Testing	-2.27916	0.00695904	2.42825
[ATPP]Br-Phenol (1 : 4)	313.15	886.6	0.03864	0.44244	0.33124	3.87525	3.95697	5.02433	2.52818	0.739	0.60583	0.0118	-1.9477	Testing	-1.94255	0.00690775	1.60793
[ATPP]Br-Phenol (1 : 4)	313.15	1093.3	0.03864	0.44244	0.33124	3.87525	3.95697	5.02433	2.52818	0.739	0.60583	0.0118	-1.7254	Testing	-1.67514	0.0069378	1.96161
[ATPP]Br-Phenol (1 : 4)	313.15	1333.2	0.03864	0.44244	0.33124	3.87525	3.95697	5.02433	2.52818	0.739	0.60583	0.0118	-1.5446	Testing	-1.37844	0.00705309	2.19315
[ATPP]Br-Phenol (1 : 4)	323.15	231.4	0.03864	0.44244	0.33124	3.87525	3.95697	5.02433	2.52818	0.739	0.60583	0.0118	-3.3785	Training	-3.4791	0.00760412	3.29589
[ATPP]Br-Phenol (1 : 4)	323.15	415.3	0.03864	0.44244	0.33124	3.87525	3.95697	5.02433	2.52818	0.739	0.60583	0.0118	-3.0262	Testing	-2.78754	0.00742481	2.71787
[ATPP]Br-Phenol (1 : 4)	323.15	683.8	0.03864	0.44244	0.33124	3.87525	3.95697	5.02433	2.52818	0.739	0.60583	0.0118	-2.4361	Training	-2.33312	0.00725417	2.27699
[ATPP]Br-Phenol (1 : 4)	323.15	904.6	0.03864	0.44244	0.33124	3.87525	3.95697	5.02433	2.52818	0.739	0.60583	0.0118	-2.081	Testing	-2.05126	0.00719493	1.52943
[ATPP]Br-Phenol (1 : 4)	323.15	1125.7	0.03864	0.44244	0.33124	3.87525	3.95697	5.02433	2.52818	0.739	0.60583	0.0118	-1.8024	Testing	-1.77436	0.00720894	2.00236
[ATPP]Br-Phenol (1 : 4)	323.15	1325.9	0.03864	0.44244	0.33124	3.87525	3.95697	5.02433	2.52818	0.739	0.60583	0.0118	-1.6225	Testing	-1.53885	0.00728493	2.26285
[ATPP]Br-Phenol (1 : 4)	333.15	182.7	0.03864	0.44244	0.33124	3.87525	3.95697	5.02433	2.52818	0.739	0.60583	0.0118	-3.8971	Training	-3.90768	0.0082211	3.36546
[ATPP]Br-Phenol (1 : 4)	333.15	472.8	0.03864	0.44244	0.33124	3.87525	3.95697	5.02433	2.52818	0.739	0.60583	0.0118	-2.9375	Testing	-2.79423	0.00790538	2.95218
[ATPP]Br-Phenol (1 : 4)	333.15	664.5	0.03864	0.44244	0.33124	3.87525	3.95697	5.02433	2.52818	0.739	0.60583	0.0118	-2.5549	Testing	-2.49329	0.00776607	2.49012
[ATPP]Br-Phenol (1 : 4)	333.15	821.3	0.03864	0.44244	0.33124	3.87525	3.95697	5.02433	2.52818	0.739	0.60583	0.0118	-2.2692	Testing	-2.29202	0.00769313	2.04902
[ATPP]Br-Phenol (1 : 4)	333.15	1066.4	0.03864	0.44244	0.33124	3.87525	3.95697	5.02433	2.52818	0.739	0.60583	0.0118	-1.9562	Training	-1.9876	0.00765306	2.0122
[ATPP]Br-Phenol (1 : 4)	333.15	1345.1	0.03864	0.44244	0.33124	3.87525	3.95697	5.02433	2.52818	0.739	0.60583	0.0118	-1.7176	Training	-1.66733	0.00771705	2.35409
[ATPP]Br-DEG (1 : 4)	303.15	160	0	0.11608	0.79248	4.06229	6.72937	3.43721	0.91582	1.41896	1.51199	0.0118	-3.341	Testing	-3.62786	0.00282033	3.54789
[ATPP]Br-DEG (1 : 4)	303.15	340	0	0.11608	0.79248	4.06229	6.72937	3.43721	0.91582	1.41896	1.51199	0.0118	-2.5666	Training	-2.71988	0.00266664	3.66173
[ATPP]Br-DEG (1 : 4)	303.15	491	0	0.11608	0.79248	4.06229	6.72937	3.43721	0.91582	1.41896	1.51199	0.0118	-2.1768	Testing	-2.28931	0.00257522	3.39496
[ATPP]Br-DEG (1 : 4)	303.15	739	0	0.11608	0.79248	4.06229	6.72937	3.43721	0.91582	1.41896	1.51199	0.0118	-1.7493	Training	-1.79709	0.00249934	2.73033
[ATPP]Br-DEG (1 : 4)	303.15	870	0	0.11608	0.79248	4.06229	6.72937	3.43721	0.91582	1.41896	1.51199	0.0118	-1.5242	Training	-1.58463	0.00249653	2.69909
[ATPP]Br-TEG (1 : 4)	303.15	142	0	0	0.13388	5.75765	7.64889	3.62673	1.27866	1.41652	1.46711	0.02688	-3.3187	Testing	-3.42489	0.00665838	3.30921
[ATPP]Br-TEG (1 : 4)	303.15	333	0	0	0.13388	5.75765	7.64889	3.62673	1.27866	1.41652	1.46711	0.02688	-2.4569	Training	-2.4689	0.00668584	3.31392
[ATPP]Br-TEG (1 : 4)	303.15	490	0	0	0.13388	5.75765	7.64889	3.62673	1.27866	1.41652	1.46711	0.02688	-2.062	Training	-2.06114	0.00674942	3.12075
[ATPP]Br-TEG (1 : 4)	303.15	718	0	0	0.13388	5.75765	7.64889	3.62673	1.27866	1.41652	1.46711	0.02688	-1.6471	Training	-1.65726	0.00690764	2.46527
[ATPP]Br-TEG (1 : 4)	303.15	874	0	0	0.13388	5.75765	7.64889	3.62673	1.27866	1.41652	1.46711	0.02688	-1.4077	Training	-1.42782	0.00706085	2.43586
[ATPP]Br-TEG (1 : 4)	303.15	1070	0	0	0.13388	5.75765	7.64889	3.62673	1.27866	1.41652	1.46711	0.02688	-1.1957	Training	-1.17563	0.00730513	2.7808
[Ch]Cl-Phenol (1 : 4)	313.15	2360	0.03864	0.44244	0.55071	3.54545	2.67016	2.89038	2.45733	0.8214	0.74531	0.00076	-2.3592	Testing	-2.52079	0.00474855	-0.0953397
[Ch]Cl-Phenol (1 : 4)	313.15	4470	0.03864	0.44244	0.55071	3.54545	2.67016	2.89038	2.45733	0.8214	0.74531	0.00076	-1.974	Training	-1.84292	0.0128083	-0.832551
[TBA]Br-Hexanoic acid (1 : 4)	303.15	506	0.04256	0.41232	0.33474	2.24579	9.69019	5.02046	0.93453	1.51529	0.86457	0.00159	-2.9188	Testing	-2.96084	0.00478087	0.587699
[TBA]Br-Hexanoic acid (1 : 4)	303.15	623	0.04256	0.41232	0.33474	2.24579	9.69019	5.02046	0.93453	1.51529	0.86457	0.00159	-2.738	Testing	-2.76631	0.00470738	0.183503
[TBA]Br-Hexanoic acid (1 : 4)	303.15	826	0.04256	0.41232	0.33474	2.24579	9.69019	5.02046	0.93453	1.51529	0.86457	0.00159	-2.5183	Training	-2.50188	0.00462863	-0.657598
[TBA]Br-Hexanoic acid (1 : 4)	303.15	930	0.04256	0.41232	0.33474	2.24579	9.69019	5.02046	0.93453	1.51529	0.86457	0.00159	-2.3645	Testing	-2.38926	0.00461226	-0.405423
[TBA]Br-Hexanoic acid (1 : 4)	303.15	1035	0.04256	0.41232	0.33474	2.24579	9.69019	5.02046	0.93453	1.51529	0.86457	0.00159	-2.2926	Testing	-2.28691	0.00461219	-0.320852
[TBA]Br-Hexanoic acid (1 : 4)	303.15	1125	0.04256	0.41232	0.33474	2.24579	9.69019	5.02046	0.93453	1.51529	0.86457	0.00159	-2.2046	Training	-2.20661	0.0046253	-0.154333
[TBA]Br-Hexanoic acid (1 : 4)	303.15	1335	0.04256	0.41232	0.33474	2.24579	9.69019	5.02046	0.93453	1.51529	0.86457	0.00159	-2.0364	Training	-2.03959	0.00470319	0.0758864
[TBA]Br-Hexanoic acid (1 : 4)	313.15	521	0.04256	0.41232	0.33474	2.24579	9.69019	5.02046	0.93453	1.51529	0.86457	0.00159	-3.11	Testing	-3.11442	0.00497414	0.472256
[TBA]Br-Hexanoic acid (1 : 4)	313.15	627	0.04256	0.41232	0.33474	2.24579	9.69019	5.02046	0.93453	1.51529	0.86457	0.00159	-2.9096	Testing	-2.94455	0.00489638	0.190897
[TBA]Br-Hexanoic acid (1 : 4)	313.15	754	0.04256	0.41232	0.33474	2.24579	9.69019	5.02046	0.93453	1.51529	0.86457	0.00159	-2.8084	Training	-2.7751	0.00482541	-0.440903
[TBA]Br-Hexanoic acid (1 : 4)	313.15	829	0.04256	0.41232	0.33474	2.24579	9.69019	5.02046	0.93453	1.51529	0.86457	0.00159	-2.6722	Testing	-2.68694	0.00479487	-0.680218
[TBA]Br-Hexanoic acid (1 : 4)	313.15	911	0.04256	0.41232	0.33474	2.24579	9.69019	5.02046	0.93453	1.51529	0.86457	0.00159	-2.605	Testing	-2.59825	0.00477114	-0.703482
[TBA]Br-Hexanoic acid (1 : 4)	313.15	990	0.04256	0.41232	0.33474	2.24579	9.69019	5.02046	0.93453	1.51529	0.86457	0.00159	-2.4925	Testing	-2.51907	0.00475783	-0.504471
[TBA]Br-Hexanoic acid (1 : 4)	313.15	1170	0.04256	0.41232	0.33474	2.24579	9.69019	5.02046	0.93453	1.51529	0.86457	0.00159	-2.3991	Training	-2.35659	0.00476249	-0.400635
[TBA]Br-Hexanoic acid (1 : 4)	323.15	457	0.04256	0.41232	0.33474	2.24579	9.69019	5.02046	0.93453	1.51529	0.86457	0.00159	-3.4802	Testing	-3.45245	0.00542814	0.497786
[TBA]Br-Hexanoic acid (1 : 4)	323.15	540	0.04256	0.41232	0.33474	2.24579	9.69019	5.02046	0.93453	1.51529	0.86457	0.00159	-3.3159	Training	-3.29968	0.00534789	0.337135
[TBA]Br-Hexanoic acid (1 : 4)	323.15	652	0.04256	0.41232	0.33474	2.24579	9.69019	5.02046	0.93453	1.51529	0.86457	0.00159	-3.1559	Training	-3.12972	0.005256	-0.0884432
[TBA]Br-Hexanoic acid (1 : 4)	323.15	723	0.04256	0.41232	0.33474	2.24579	9.69019	5.02046	0.93453	1.51529	0.86457	0.00159	-3.0303	Testing	-3.03612	0.00520749	-0.331098
[TBA]Br-Hexanoic acid (1 : 4)	323.15	847	0.04256	0.41232	0.33474	2.24579	9.69019	5.02046	0.93453	1.51529	0.86457	0.00159	-2.9041	Testing	-2.89045	0.00514093	-0.911114
[TBA]Br-Hexanoic acid (1 : 4)	323.15	993	0.04256	0.41232	0.33474	2.24579	9.69019	5.02046	0.93453	1.51529	0.86457	0.00159	-2.7257	Training	-2.73971	0.00509215	-0.782231
[TBA]Br-Hexanoic acid (1 : 4)	323.15	1145	0.04256	0.41232	0.33474	2.24579	9.69019	5.02046	0.93453	1.51529	0.86457	0.00159	-2.5943	Training	-2.59947	0.00507535	-0.592766
[TEA]Br-Hexanoic acid (1 : 4)	303.15	483	0.04256	0.41232	0.3374	2.6125	7.66124	3.67438	0.9424	1.51663	0.90101	0	-3.3298	Training	-3.24531	0.00480359	0.221815
[TEA]Br-Hexanoic acid (1 : 4)	303.15	578	0.04256	0.41232	0.3374	2.6125	7.66124	3.67438	0.9424	1.51663	0.90101	0	-3.1304	Training	-3.08115	0.00472992	0.0114128
[TEA]Br-Hexanoic acid (1 : 4)	303.15	661	0.04256	0.41232	0.3374	2.6125	7.66124	3.67438	0.9424	1.51663	0.90101	0	-3.0662	Testing	-2.96002	0.00467664	-0.459968
[TEA]Br-Hexanoic acid (1 : 4)	303.15	824	0.04256	0.41232	0.3374	2.6125	7.66124	3.67438	0.9424	1.51663	0.90101	0	-2.779	Testing	-2.76051	0.0046021	-0.941215
[TEA]Br-Hexanoic acid (1 : 4)	303.15	922	0.04256	0.41232	0.3374	2.6125	7.66124	3.67438	0.9424	1.51663	0.90101	0	-2.6766	Testing	-2.65786	0.00457649	-0.788273
[TEA]Br-Hexanoic acid (1 : 4)	303.15	1024	0.04256	0.41232	0.3374	2.6125	7.66124	3.67438	0.9424	1.51663	0.90101	0	-2.5639	Training	-2.56131	0.00456514	-0.58228
[TEA]Br-Hexanoic acid (1 : 4)	303.15	1263	0.04256	0.41232	0.3374	2.6125	7.66124	3.67438	0.9424	1.51663	0.90101	0	-2.3486	Testing	-2.36531	0.00459972	-0.294575
[TEA]Br-Hexanoic acid (1 : 4)	313.15	388	0.04256	0.41232	0.3374	2.6125	7.66124	3.67438	0.9424	1.51663	0.90101	0	-3.7091	Testing	-3.61127	0.0054203	0.404107
[TEA]Br-Hexanoic acid (1 : 4)	313.15	456	0.04256	0.41232	0.3374	2.6125	7.66124	3.67438	0.9424	1.51663	0.90101	0	-3.572	Testing	-3.45934	0.00534834	0.243412
[TEA]Br-Hexanoic acid (1 : 4)	313.15	585	0.04256	0.41232	0.3374	2.6125	7.66124	3.67438	0.9424	1.51663	0.90101	0	-3.3187	Training	-3.23494	0.0052309	-0.0420642
[TEA]Br-Hexanoic acid (1 : 4)	313.15	714	0.04256	0.41232	0.3374	2.6125	7.66124	3.67438	0.9424	1.51663	0.90101	0	-3.0989	Testing	-3.05866	0.00513845	-0.4754
[TEA]Br-Hexanoic acid (1 : 4)	313.15	856	0.04256	0.41232	0.3374	2.6125	7.66124	3.67438	0.9424	1.51663	0.90101	0	-2.8914	Testing	-2.89666	0.00506555	-0.990012
[TEA]Br-Hexanoic acid (1 : 4)	313.15	992	0.04256	0.41232	0.3374	2.6125	7.66124	3.67438	0.9424	1.51663	0.90101	0	-2.7426	Training	-2.76235	0.00502412	-0.729816
[TEA]Br-Hexanoic acid (1 : 4)	313.15	1161	0.04256	0.41232	0.3374	2.6125	7.66124	3.67438	0.9424	1.51663	0.90101	0	-2.5523	Testing	-2.6151	0.00501132	-0.442437
[TEA]Br-Hexanoic acid (1 : 4)	323.15	458	0.04256	0.41232	0.3374	2.6125	7.66124	3.67438	0.9424	1.51663	0.90101	0	-3.6889	Training	-3.64299	0.00605479	0.436162
[TEA]Br-Hexanoic acid (1 : 4)	323.15	553	0.04256	0.41232	0.3374	2.6125	7.66124	3.67438	0.9424	1.51663	0.90101	0	-3.4933	Testing	-3.47506	0.00595478	0.176593
[TEA]Br-Hexanoic acid (1 : 4)	323.15	626	0.04256	0.41232	0.3374	2.6125	7.66124	3.67438	0.9424	1.51663	0.90101	0	-3.3755	Training	-3.36674	0.00588713	-0.0286571
[TEA]Br-Hexanoic acid (1 : 4)	323.15	718	0.04256	0.41232	0.3374	2.6125	7.66124	3.67438	0.9424	1.51663	0.90101	0	-3.2315	Training	-3.24701	0.00581328	-0.348515
[TEA]Br-Hexanoic acid (1 : 4)	323.15	804	0.04256	0.41232	0.3374	2.6125	7.66124	3.67438	0.9424	1.51663	0.90101	0	-3.1055	Testing	-3.14715	0.00575573	-0.69069
[TEA]Br-Hexanoic acid (1 : 4)	323.15	947	0.04256	0.41232	0.3374	2.6125	7.66124	3.67438	0.9424	1.51663	0.90101	0	-2.9431	Testing	-2.99929	0.00568461	-0.936432
[TEA]Br-Hexanoic acid (1 : 4)	323.15	1114	0.04256	0.41232	0.3374	2.6125	7.66124	3.67438	0.9424	1.51663	0.90101	0	-2.8285	Training	-2.84663	0.00564041	-0.780749
Betain-1,2-propanediol (1 : 5)	308.15	190.8	0.000166667	0.304	0.787975	2.41784	4.06129	1.67713	0.754142	0.971342	1.12678	0.144625	-5.2591	Training	-5.31408	0.00367398	-0.660787
Betain-1,2-propanediol (1 : 5)	308.15	302.3	0.000166667	0.304	0.787975	2.41784	4.06129	1.67713	0.754142	0.971342	1.12678	0.144625	-4.8159	Training	-4.78598	0.00361649	-0.579743
Betain-1,2-propanediol (1 : 5)	308.15	404.3	0.000166667	0.304	0.787975	2.41784	4.06129	1.67713	0.754142	0.971342	1.12678	0.144625	-4.4918	Testing	-4.47349	0.00358025	-0.570768
Betain-1,2-propanediol (1 : 5)	308.15	506.5	0.000166667	0.304	0.787975	2.41784	4.06129	1.67713	0.754142	0.971342	1.12678	0.144625	-4.2687	Testing	-4.24605	0.00355959	-0.772769
Betain-1,2-propanediol (1 : 5)	308.15	606.5	0.000166667	0.304	0.787975	2.41784	4.06129	1.67713	0.754142	0.971342	1.12678	0.144625	-4.0628	Training	-4.06394	0.00355456	-0.982511
Betain-1,2-propanediol (1 : 5)	318.15	208	0.000166667	0.304	0.787975	2.41784	4.06129	1.67713	0.754142	0.971342	1.12678	0.144625	-5.4037	Training	-5.3939	0.00400128	-0.799782
Betain-1,2-propanediol (1 : 5)	318.15	317.5	0.000166667	0.304	0.787975	2.41784	4.06129	1.67713	0.754142	0.971342	1.12678	0.144625	-4.9762	Testing	-4.90352	0.00393436	-0.649519
Betain-1,2-propanediol (1 : 5)	318.15	424.8	0.000166667	0.304	0.787975	2.41784	4.06129	1.67713	0.754142	0.971342	1.12678	0.144625	-4.6052	Training	-4.58847	0.00388625	-0.518825
Betain-1,2-propanediol (1 : 5)	318.15	531.8	0.000166667	0.304	0.787975	2.41784	4.06129	1.67713	0.754142	0.971342	1.12678	0.144625	-4.3741	Testing	-4.35697	0.00385548	-0.761804
Betain-1,2-propanediol (1 : 5)	318.15	637	0.000166667	0.304	0.787975	2.41784	4.06129	1.67713	0.754142	0.971342	1.12678	0.144625	-4.1669	Testing	-4.16765	0.00384198	-1.02177
Betain-1,2-propanediol (1 : 5)	328.15	211.3	0.000166667	0.304	0.787975	2.41784	4.06129	1.67713	0.754142	0.971342	1.12678	0.144625	-5.5468	Training	-5.53758	0.00452334	-0.686619
Betain-1,2-propanediol (1 : 5)	328.15	332.3	0.000166667	0.304	0.787975	2.41784	4.06129	1.67713	0.754142	0.971342	1.12678	0.144625	-5.0832	Training	-5.00735	0.00443654	-0.543107
Betain-1,2-propanediol (1 : 5)	328.15	444.3	0.000166667	0.304	0.787975	2.41784	4.06129	1.67713	0.754142	0.971342	1.12678	0.144625	-4.7105	Testing	-4.69012	0.00437578	-0.492563
Betain-1,2-propanediol (1 : 5)	328.15	556.3	0.000166667	0.304	0.787975	2.41784	4.06129	1.67713	0.754142	0.971342	1.12678	0.144625	-4.4654	Testing	-4.45315	0.00433385	-0.712527
Betain-1,2-propanediol (1 : 5)	328.15	666.5	0.000166667	0.304	0.787975	2.41784	4.06129	1.67713	0.754142	0.971342	1.12678	0.144625	-4.2545	Testing	-4.25699	0.00431097	-0.9991
Betain-1,2-propanediol (1 : 5)	338.15	213.5	0.000166667	0.304	0.787975	2.41784	4.06129	1.67713	0.754142	0.971342	1.12678	0.144625	-5.684	Testing	-5.67613	0.00523301	-0.565167
Betain-1,2-propanediol (1 : 5)	338.15	338.8	0.000166667	0.304	0.787975	2.41784	4.06129	1.67713	0.754142	0.971342	1.12678	0.144625	-5.185	Testing	-5.12893	0.00512892	-0.416779
Betain-1,2-propanediol (1 : 5)	338.15	463.5	0.000166667	0.304	0.787975	2.41784	4.06129	1.67713	0.754142	0.971342	1.12678	0.144625	-4.8036	Testing	-4.78219	0.00504873	-0.410163
Betain-1,2-propanediol (1 : 5)	338.15	573.3	0.000166667	0.304	0.787975	2.41784	4.06129	1.67713	0.754142	0.971342	1.12678	0.144625	-4.5564	Testing	-4.55317	0.00499745	-0.609778
Betain-1,2-propanediol (1 : 5)	338.15	687.3	0.000166667	0.304	0.787975	2.41784	4.06129	1.67713	0.754142	0.971342	1.12678	0.144625	-4.3428	Training	-4.35111	0.00496335	-0.898537
Betain-1,2-propanediol (1 : 5)	348.15	215	0.000166667	0.304	0.787975	2.41784	4.06129	1.67713	0.754142	0.971342	1.12678	0.144625	-5.843	Training	-5.81407	0.00613025	-0.432069
Betain-1,2-propanediol (1 : 5)	348.15	344.5	0.000166667	0.304	0.787975	2.41784	4.06129	1.67713	0.754142	0.971342	1.12678	0.144625	-5.2785	Training	-5.24905	0.00600785	-0.208473
Betain-1,2-propanediol (1 : 5)	348.15	482	0.000166667	0.304	0.787975	2.41784	4.06129	1.67713	0.754142	0.971342	1.12678	0.144625	-4.8796	Training	-4.87273	0.00590545	-0.25222
Betain-1,2-propanediol (1 : 5)	348.15	593.5	0.000166667	0.304	0.787975	2.41784	4.06129	1.67713	0.754142	0.971342	1.12678	0.144625	-4.6356	Training	-4.64404	0.00584324	-0.475599
Betain-1,2-propanediol (1 : 5)	348.15	729	0.000166667	0.304	0.787975	2.41784	4.06129	1.67713	0.754142	0.971342	1.12678	0.144625	-4.4063	Training	-4.40873	0.00579277	-0.905996
[Ch]Cl-Guaiacol (1 : 5)	293.15	52.8	0	0.186916	0.540884	4.25687	3.74588	3.27892	2.80102	0.833182	0.641489	0.000646	-6.0323	Training	-6.02946	0.00486317	-1.36945
[Ch]Cl-Guaiacol (1 : 5)	293.15	139.8	0	0.186916	0.540884	4.25687	3.74588	3.27892	2.80102	0.833182	0.641489	0.000646	-5.1328	Training	-5.25704	0.00482899	-0.798713
[Ch]Cl-Guaiacol (1 : 5)	293.15	246.1	0	0.186916	0.540884	4.25687	3.74588	3.27892	2.80102	0.833182	0.641489	0.000646	-4.5282	Testing	-4.58737	0.00480265	-0.824983
[Ch]Cl-Guaiacol (1 : 5)	293.15	331.1	0	0.186916	0.540884	4.25687	3.74588	3.27892	2.80102	0.833182	0.641489	0.000646	-4.2336	Testing	-4.24393	0.00479379	-0.740214
[Ch]Cl-Guaiacol (1 : 5)	293.15	419.5	0	0.186916	0.540884	4.25687	3.74588	3.27892	2.80102	0.833182	0.641489	0.000646	-3.99	Testing	-4.00678	0.00479608	-0.797589
[Ch]Cl-Guaiacol (1 : 5)	293.15	528.4	0	0.186916	0.540884	4.25687	3.74588	3.27892	2.80102	0.833182	0.641489	0.000646	-3.7593	Testing	-3.80907	0.00481503	-1.02912
[Ch]Cl-Guaiacol (1 : 5)	303.15	46.9	0	0.186916	0.540884	4.25687	3.74588	3.27892	2.80102	0.833182	0.641489	0.000646	-6.3771	Training	-6.19956	0.00471032	-1.56864
[Ch]Cl-Guaiacol (1 : 5)	303.15	145.2	0	0.186916	0.540884	4.25687	3.74588	3.27892	2.80102	0.833182	0.641489	0.000646	-5.2591	Training	-5.33902	0.00465989	-0.683387
[Ch]Cl-Guaiacol (1 : 5)	303.15	239.4	0	0.186916	0.540884	4.25687	3.74588	3.27892	2.80102	0.833182	0.641489	0.000646	-4.733	Training	-4.7556	0.00462516	-0.799007
[Ch]Cl-Guaiacol (1 : 5)	303.15	330.4	0	0.186916	0.540884	4.25687	3.74588	3.27892	2.80102	0.833182	0.641489	0.000646	-4.4063	Training	-4.39098	0.00460427	-0.679709
[Ch]Cl-Guaiacol (1 : 5)	303.15	431.8	0	0.186916	0.540884	4.25687	3.74588	3.27892	2.80102	0.833182	0.641489	0.000646	-4.1289	Training	-4.13527	0.00459563	-0.751623
[Ch]Cl-Guaiacol (1 : 5)	303.15	538.9	0	0.186916	0.540884	4.25687	3.74588	3.27892	2.80102	0.833182	0.641489	0.000646	-3.912	Training	-3.95751	0.00460326	-1.0075
[Ch]Cl-Guaiacol (1 : 5)	313.15	55.3	0	0.186916	0.540884	4.25687	3.74588	3.27892	2.80102	0.833182	0.641489	0.000646	-6.2659	Training	-6.21689	0.00473623	-0.945424
[Ch]Cl-Guaiacol (1 : 5)	313.15	140.7	0	0.186916	0.540884	4.25687	3.74588	3.27892	2.80102	0.833182	0.641489	0.000646	-5.4037	Training	-5.48267	0.00468243	-0.434263
[Ch]Cl-Guaiacol (1 : 5)	313.15	235.9	0	0.186916	0.540884	4.25687	3.74588	3.27892	2.80102	0.833182	0.641489	0.000646	-4.8796	Training	-4.89419	0.00463535	-0.678523
[Ch]Cl-Guaiacol (1 : 5)	313.15	331.8	0	0.186916	0.540884	4.25687	3.74588	3.27892	2.80102	0.833182	0.641489	0.000646	-4.5375	Testing	-4.51809	0.00460169	-0.582962
[Ch]Cl-Guaiacol (1 : 5)	313.15	434.8	0	0.186916	0.540884	4.25687	3.74588	3.27892	2.80102	0.833182	0.641489	0.000646	-4.2545	Training	-4.27079	0.00458091	-0.628141
[Ch]Cl-Guaiacol (1 : 5)	313.15	536.4	0	0.186916	0.540884	4.25687	3.74588	3.27892	2.80102	0.833182	0.641489	0.000646	-4.0456	Testing	-4.11101	0.00457601	-0.882437
[Ch]Cl-Guaiacol (1 : 5)	323.15	48.5	0	0.186916	0.540884	4.25687	3.74588	3.27892	2.80102	0.833182	0.641489	0.000646	-6.5023	Testing	-6.36828	0.00495994	-0.891028
[Ch]Cl-Guaiacol (1 : 5)	323.15	146.3	0	0.186916	0.540884	4.25687	3.74588	3.27892	2.80102	0.833182	0.641489	0.000646	-5.5215	Training	-5.53809	0.00488651	-0.302417
[Ch]Cl-Guaiacol (1 : 5)	323.15	237.5	0	0.186916	0.540884	4.25687	3.74588	3.27892	2.80102	0.833182	0.641489	0.000646	-5.036	Training	-4.99324	0.00483098	-0.617817
[Ch]Cl-Guaiacol (1 : 5)	323.15	334.9	0	0.186916	0.540884	4.25687	3.74588	3.27892	2.80102	0.833182	0.641489	0.000646	-4.667	Training	-4.6252	0.00478546	-0.44444
[Ch]Cl-Guaiacol (1 : 5)	323.15	432	0	0.186916	0.540884	4.25687	3.74588	3.27892	2.80102	0.833182	0.641489	0.000646	-4.4228	Testing	-4.4008	0.00475425	-0.58885
[Ch]Cl-Guaiacol (1 : 5)	323.15	529.2	0	0.186916	0.540884	4.25687	3.74588	3.27892	2.80102	0.833182	0.641489	0.000646	-4.2131	Training	-4.25234	0.00473719	-0.765829
DiethylammoniumCl-Guaiacol (1 : 5)	293.15	48.8	0.130058	0.363793	0.368768	4.0602	3.88938	3.36641	2.6897	0.578385	0.817702	0.105009	-5.9522	Training	-5.83375	0.00864423	-0.949237
DiethylammoniumCl-Guaiacol (1 : 5)	293.15	131.9	0.130058	0.363793	0.368768	4.0602	3.88938	3.36641	2.6897	0.578385	0.817702	0.105009	-4.9477	Training	-5.08326	0.00862286	-0.060482
DiethylammoniumCl-Guaiacol (1 : 5)	293.15	245.3	0.130058	0.363793	0.368768	4.0602	3.88938	3.36641	2.6897	0.578385	0.817702	0.105009	-4.3505	Training	-4.35265	0.00861043	-0.217711
DiethylammoniumCl-Guaiacol (1 : 5)	293.15	326.5	0.130058	0.363793	0.368768	4.0602	3.88938	3.36641	2.6897	0.578385	0.817702	0.105009	-4.0628	Testing	-4.01754	0.00861339	-0.153853
DiethylammoniumCl-Guaiacol (1 : 5)	293.15	419.2	0.130058	0.363793	0.368768	4.0602	3.88938	3.36641	2.6897	0.578385	0.817702	0.105009	-3.8077	Testing	-3.76149	0.00862887	-0.214828
DiethylammoniumCl-Guaiacol (1 : 5)	293.15	522.3	0.130058	0.363793	0.368768	4.0602	3.88938	3.36641	2.6897	0.578385	0.817702	0.105009	-3.5936	Testing	-3.56612	0.00866123	-0.444024
DiethylammoniumCl-Guaiacol (1 : 5)	303.15	57	0.130058	0.363793	0.368768	4.0602	3.88938	3.36641	2.6897	0.578385	0.817702	0.105009	-5.9145	Training	-5.89555	0.00860348	-0.496227
DiethylammoniumCl-Guaiacol (1 : 5)	303.15	148.3	0.130058	0.363793	0.368768	4.0602	3.88938	3.36641	2.6897	0.578385	0.817702	0.105009	-5.0056	Testing	-5.10382	0.00857075	-0.016491
DiethylammoniumCl-Guaiacol (1 : 5)	303.15	244.9	0.130058	0.363793	0.368768	4.0602	3.88938	3.36641	2.6897	0.578385	0.817702	0.105009	-4.4918	Testing	-4.50764	0.00854975	-0.140776
DiethylammoniumCl-Guaiacol (1 : 5)	303.15	341.2	0.130058	0.363793	0.368768	4.0602	3.88938	3.36641	2.6897	0.578385	0.817702	0.105009	-4.1605	Training	-4.12623	0.00854275	-0.0148129
DiethylammoniumCl-Guaiacol (1 : 5)	303.15	424.4	0.130058	0.363793	0.368768	4.0602	3.88938	3.36641	2.6897	0.578385	0.817702	0.105009	-3.9425	Training	-3.90863	0.00854791	-0.096542
DiethylammoniumCl-Guaiacol (1 : 5)	303.15	520.1	0.130058	0.363793	0.368768	4.0602	3.88938	3.36641	2.6897	0.578385	0.817702	0.105009	-3.7423	Training	-3.72958	0.0085667	-0.310077
DiethylammoniumCl-Guaiacol (1 : 5)	313.15	58.8	0.130058	0.363793	0.368768	4.0602	3.88938	3.36641	2.6897	0.578385	0.817702	0.105009	-6.0323	Training	-6.01546	0.00875169	-0.296416
DiethylammoniumCl-Guaiacol (1 : 5)	313.15	156	0.130058	0.363793	0.368768	4.0602	3.88938	3.36641	2.6897	0.578385	0.817702	0.105009	-5.0832	Testing	-5.18918	0.00870588	0.169129
DiethylammoniumCl-Guaiacol (1 : 5)	313.15	273.6	0.130058	0.363793	0.368768	4.0602	3.88938	3.36641	2.6897	0.578385	0.817702	0.105009	-4.519	Training	-4.52183	0.00866943	0.0647313
DiethylammoniumCl-Guaiacol (1 : 5)	313.15	336.3	0.130058	0.363793	0.368768	4.0602	3.88938	3.36641	2.6897	0.578385	0.817702	0.105009	-4.32	Training	-4.28995	0.00865848	0.085218
DiethylammoniumCl-Guaiacol (1 : 5)	313.15	428.6	0.130058	0.363793	0.368768	4.0602	3.88938	3.36641	2.6897	0.578385	0.817702	0.105009	-4.0745	Testing	-4.04882	0.00865309	-0.0327965
DiethylammoniumCl-Guaiacol (1 : 5)	313.15	550.7	0.130058	0.363793	0.368768	4.0602	3.88938	3.36641	2.6897	0.578385	0.817702	0.105009	-3.8213	Testing	-3.83051	0.00866562	-0.305055
DiethylammoniumCl-Guaiacol (1 : 5)	323.15	59.9	0.130058	0.363793	0.368768	4.0602	3.88938	3.36641	2.6897	0.578385	0.817702	0.105009	-6.2146	Testing	-6.13476	0.00908729	-0.267875
DiethylammoniumCl-Guaiacol (1 : 5)	323.15	193.1	0.130058	0.363793	0.368768	4.0602	3.88938	3.36641	2.6897	0.578385	0.817702	0.105009	-4.9908	Training	-5.07442	0.00901238	0.274608
DiethylammoniumCl-Guaiacol (1 : 5)	323.15	253.3	0.130058	0.363793	0.368768	4.0602	3.88938	3.36641	2.6897	0.578385	0.817702	0.105009	-4.733	Testing	-4.74846	0.00898726	0.107634
DiethylammoniumCl-Guaiacol (1 : 5)	323.15	333.8	0.130058	0.363793	0.368768	4.0602	3.88938	3.36641	2.6897	0.578385	0.817702	0.105009	-4.4482	Testing	-4.43412	0.00896217	0.201351
DiethylammoniumCl-Guaiacol (1 : 5)	323.15	431.5	0.130058	0.363793	0.368768	4.0602	3.88938	3.36641	2.6897	0.578385	0.817702	0.105009	-4.1865	Training	-4.17833	0.00894479	0.159551
DiethylammoniumCl-Guaiacol (1 : 5)	323.15	535.8	0.130058	0.363793	0.368768	4.0602	3.88938	3.36641	2.6897	0.578385	0.817702	0.105009	-3.9633	Testing	-3.98744	0.00894205	-0.0960548
[Ach]Cl-Guaiacol (1 : 5)	293.15	49.3	0	0.186916	0.5404	4.3176	4.21623	3.37952	2.83507	0.91145	0.623452	0.0022525	-6.0748	Testing	-5.90819	0.00599461	-1.531
[Ach]Cl-Guaiacol (1 : 5)	293.15	137.3	0	0.186916	0.5404	4.3176	4.21623	3.37952	2.83507	0.91145	0.623452	0.0022525	-5.036	Training	-5.12452	0.00596195	-0.64278
[Ach]Cl-Guaiacol (1 : 5)	293.15	230	0	0.186916	0.5404	4.3176	4.21623	3.37952	2.83507	0.91145	0.623452	0.0022525	-4.4918	Testing	-4.52258	0.00594012	-0.750805
[Ach]Cl-Guaiacol (1 : 5)	293.15	325.5	0	0.186916	0.5404	4.3176	4.21623	3.37952	2.83507	0.91145	0.623452	0.0022525	-4.1352	Training	-4.11974	0.00593113	-0.571491
[Ach]Cl-Guaiacol (1 : 5)	293.15	421.7	0	0.186916	0.5404	4.3176	4.21623	3.37952	2.83507	0.91145	0.623452	0.0022525	-3.8728	Training	-3.86305	0.0059359	-0.641548
[Ach]Cl-Guaiacol (1 : 5)	293.15	522.2	0	0.186916	0.5404	4.3176	4.21623	3.37952	2.83507	0.91145	0.623452	0.0022525	-3.6691	Training	-3.68325	0.00595573	-0.881259
[Ach]Cl-Guaiacol (1 : 5)	303.15	52	0	0.186916	0.5404	4.3176	4.21623	3.37952	2.83507	0.91145	0.623452	0.0022525	-6.0748	Training	-5.98228	0.0058406	-1.06275
[Ach]Cl-Guaiacol (1 : 5)	303.15	138.8	0	0.186916	0.5404	4.3176	4.21623	3.37952	2.83507	0.91145	0.623452	0.0022525	-5.1328	Testing	-5.22382	0.00579826	-0.416266
[Ach]Cl-Guaiacol (1 : 5)	303.15	222.9	0	0.186916	0.5404	4.3176	4.21623	3.37952	2.83507	0.91145	0.623452	0.0022525	-4.6565	Training	-4.68144	0.00576802	-0.625659
[Ach]Cl-Guaiacol (1 : 5)	303.15	333.2	0	0.186916	0.5404	4.3176	4.21623	3.37952	2.83507	0.91145	0.623452	0.0022525	-4.2475	Training	-4.2277	0.00574446	-0.450296
[Ach]Cl-Guaiacol (1 : 5)	303.15	428	0	0.186916	0.5404	4.3176	4.21623	3.37952	2.83507	0.91145	0.623452	0.0022525	-3.9954	Training	-3.9921	0.0057388	-0.534658
[Ach]Cl-Guaiacol (1 : 5)	303.15	528.2	0	0.186916	0.5404	4.3176	4.21623	3.37952	2.83507	0.91145	0.623452	0.0022525	-3.7898	Training	-3.82547	0.00574748	-0.767724
[Ach]Cl-Guaiacol (1 : 5)	313.15	49.9	0	0.186916	0.5404	4.3176	4.21623	3.37952	2.83507	0.91145	0.623452	0.0022525	-6.3771	Testing	-6.09343	0.00587654	-1.24122
[Ach]Cl-Guaiacol (1 : 5)	313.15	145	0	0.186916	0.5404	4.3176	4.21623	3.37952	2.83507	0.91145	0.623452	0.0022525	-5.2214	Training	-5.27925	0.00581905	-0.197796
[Ach]Cl-Guaiacol (1 : 5)	313.15	237	0	0.186916	0.5404	4.3176	4.21623	3.37952	2.83507	0.91145	0.623452	0.0022525	-4.733	Testing	-4.72182	0.00577635	-0.492544
[Ach]Cl-Guaiacol (1 : 5)	313.15	335.1	0	0.186916	0.5404	4.3176	4.21623	3.37952	2.83507	0.91145	0.623452	0.0022525	-4.3901	Testing	-4.34551	0.00574481	-0.387995
[Ach]Cl-Guaiacol (1 : 5)	313.15	432.8	0	0.186916	0.5404	4.3176	4.21623	3.37952	2.83507	0.91145	0.623452	0.0022525	-4.1289	Training	-4.11573	0.00572776	-0.442775
[Ach]Cl-Guaiacol (1 : 5)	313.15	526.5	0	0.186916	0.5404	4.3176	4.21623	3.37952	2.83507	0.91145	0.623452	0.0022525	-3.9373	Training	-3.96895	0.00572487	-0.662289
[Ach]Cl-Guaiacol (1 : 5)	323.15	48.6	0	0.186916	0.5404	4.3176	4.21623	3.37952	2.83507	0.91145	0.623452	0.0022525	-6.4378	Testing	-6.18778	0.00609972	-0.858618
[Ach]Cl-Guaiacol (1 : 5)	323.15	144.3	0	0.186916	0.5404	4.3176	4.21623	3.37952	2.83507	0.91145	0.623452	0.0022525	-5.3391	Testing	-5.37704	0.00603025	0.010116
[Ach]Cl-Guaiacol (1 : 5)	323.15	238.7	0	0.186916	0.5404	4.3176	4.21623	3.37952	2.83507	0.91145	0.623452	0.0022525	-4.8536	Testing	-4.81668	0.00597519	-0.350747
[Ach]Cl-Guaiacol (1 : 5)	323.15	341.3	0	0.186916	0.5404	4.3176	4.21623	3.37952	2.83507	0.91145	0.623452	0.0022525	-4.4918	Testing	-4.44073	0.00593052	-0.234053
[Ach]Cl-Guaiacol (1 : 5)	323.15	436.2	0	0.186916	0.5404	4.3176	4.21623	3.37952	2.83507	0.91145	0.623452	0.0022525	-4.2267	Testing	-4.23082	0.00590326	-0.287329
[Ach]Cl-Guaiacol (1 : 5)	323.15	535.8	0	0.186916	0.5404	4.3176	4.21623	3.37952	2.83507	0.91145	0.623452	0.0022525	-4.023	Testing	-4.08532	0.0058892	-0.516004
ChCl-FA (1 : 5)	303.15	77.3	0	0.232815	0.80553	3.82884	2.76399	2.65082	1.94998	0.892277	1.02931	0.000646	-5.7764	Testing	-5.78825	0.00295408	-0.138784
ChCl-FA (1 : 5)	303.15	210.2	0	0.232815	0.80553	3.82884	2.76399	2.65082	1.94998	0.892277	1.02931	0.000646	-4.7677	Testing	-4.80455	0.00279902	-0.0821199
ChCl-FA (1 : 5)	303.15	316.5	0	0.232815	0.80553	3.82884	2.76399	2.65082	1.94998	0.892277	1.02931	0.000646	-4.382	Testing	-4.33586	0.00269408	0.0639386
ChCl-FA (1 : 5)	303.15	414.7	0	0.232815	0.80553	3.82884	2.76399	2.65082	1.94998	0.892277	1.02931	0.000646	-4.0923	Testing	-4.06764	0.00261221	0.0444648
ChCl-FA (1 : 5)	303.15	516.3	0	0.232815	0.80553	3.82884	2.76399	2.65082	1.94998	0.892277	1.02931	0.000646	-3.8776	Training	-3.87894	0.00254274	-0.139596
ChCl-FA (1 : 5)	303.15	577.4	0	0.232815	0.80553	3.82884	2.76399	2.65082	1.94998	0.892277	1.02931	0.000646	-3.755	Testing	-3.7877	0.00250842	-0.318538
ChCl-FA (1 : 5)	313.15	70.9	0	0.232815	0.80553	3.82884	2.76399	2.65082	1.94998	0.892277	1.02931	0.000646	-5.9915	Training	-5.9821	0.00326271	0.0115014
ChCl-FA (1 : 5)	313.15	203.4	0	0.232815	0.80553	3.82884	2.76399	2.65082	1.94998	0.892277	1.02931	0.000646	-4.9477	Training	-4.97862	0.00309092	0.109625
ChCl-FA (1 : 5)	313.15	304.7	0	0.232815	0.80553	3.82884	2.76399	2.65082	1.94998	0.892277	1.02931	0.000646	-4.5469	Training	-4.51218	0.00297736	0.238654
ChCl-FA (1 : 5)	313.15	404.9	0	0.232815	0.80553	3.82884	2.76399	2.65082	1.94998	0.892277	1.02931	0.000646	-4.2616	Training	-4.22387	0.00288019	0.194032
ChCl-FA (1 : 5)	313.15	505.2	0	0.232815	0.80553	3.82884	2.76399	2.65082	1.94998	0.892277	1.02931	0.000646	-4.0399	Testing	-4.02939	0.00279801	-0.0375801
ChCl-FA (1 : 5)	313.15	570.2	0	0.232815	0.80553	3.82884	2.76399	2.65082	1.94998	0.892277	1.02931	0.000646	-3.9221	Testing	-3.92906	0.00275282	-0.221903
ChCl-FA (1 : 5)	323.15	71.3	0	0.232815	0.80553	3.82884	2.76399	2.65082	1.94998	0.892277	1.02931	0.000646	-6.0748	Testing	-6.12744	0.00374995	0.275757
ChCl-FA (1 : 5)	323.15	194.1	0	0.232815	0.80553	3.82884	2.76399	2.65082	1.94998	0.892277	1.02931	0.000646	-5.0995	Training	-5.18297	0.0035752	0.427577
ChCl-FA (1 : 5)	323.15	301	0	0.232815	0.80553	3.82884	2.76399	2.65082	1.94998	0.892277	1.02931	0.000646	-4.667	Training	-4.67449	0.00344151	0.42323
ChCl-FA (1 : 5)	323.15	403.6	0	0.232815	0.80553	3.82884	2.76399	2.65082	1.94998	0.892277	1.02931	0.000646	-4.3741	Training	-4.37402	0.00332933	0.379351
ChCl-FA (1 : 5)	323.15	502.8	0	0.232815	0.80553	3.82884	2.76399	2.65082	1.94998	0.892277	1.02931	0.000646	-4.1477	Training	-4.17785	0.00323589	0.202643
ChCl-FA (1 : 5)	323.15	573.1	0	0.232815	0.80553	3.82884	2.76399	2.65082	1.94998	0.892277	1.02931	0.000646	-4.0174	Testing	-4.06701	0.00317861	-0.0299044
ChCl-FA (1 : 5)	333.15	74.9	0	0.232815	0.80553	3.82884	2.76399	2.65082	1.94998	0.892277	1.02931	0.000646	-6.2146	Training	-6.25192	0.00441923	0.433525
ChCl-FA (1 : 5)	333.15	204.2	0	0.232815	0.80553	3.82884	2.76399	2.65082	1.94998	0.892277	1.02931	0.000646	-5.2214	Training	-5.28135	0.00422107	0.469243
ChCl-FA (1 : 5)	333.15	315.2	0	0.232815	0.80553	3.82884	2.76399	2.65082	1.94998	0.892277	1.02931	0.000646	-4.7795	Testing	-4.7806	0.00407097	0.45161
ChCl-FA (1 : 5)	333.15	409.6	0	0.232815	0.80553	3.82884	2.76399	2.65082	1.94998	0.892277	1.02931	0.000646	-4.5008	Training	-4.514	0.00395787	0.4787
ChCl-FA (1 : 5)	333.15	511.7	0	0.232815	0.80553	3.82884	2.76399	2.65082	1.94998	0.892277	1.02931	0.000646	-4.2904	Training	-4.31284	0.0038506	0.243346
ChCl-FA (1 : 5)	333.15	577.2	0	0.232815	0.80553	3.82884	2.76399	2.65082	1.94998	0.892277	1.02931	0.000646	-4.1734	Testing	-4.20798	0.00379003	0.0129464
ChCl-LEV (1 : 5)	303.15	71.5	0	0	0.504571	5.70588	3.71115	0.985794	1.19161	2.31079	1.03649	0.000646	-5.4968	Training	-5.48371	0.00537889	-0.102884
ChCl-LEV (1 : 5)	303.15	188.9	0	0	0.504571	5.70588	3.71115	0.985794	1.19161	2.31079	1.03649	0.000646	-4.4918	Testing	-4.6009	0.00534939	0.134239
ChCl-LEV (1 : 5)	303.15	296.9	0	0	0.504571	5.70588	3.71115	0.985794	1.19161	2.31079	1.03649	0.000646	-4.0342	Training	-4.08899	0.00534052	0.286045
ChCl-LEV (1 : 5)	303.15	401.7	0	0	0.504571	5.70588	3.71115	0.985794	1.19161	2.31079	1.03649	0.000646	-3.7423	Training	-3.77527	0.00534866	0.224012
ChCl-LEV (1 : 5)	303.15	501.5	0	0	0.504571	5.70588	3.71115	0.985794	1.19161	2.31079	1.03649	0.000646	-3.5268	Training	-3.56659	0.00537173	0.0172242
ChCl-LEV (1 : 5)	303.15	566.7	0	0	0.504571	5.70588	3.71115	0.985794	1.19161	2.31079	1.03649	0.000646	-3.4022	Testing	-3.45549	0.00539488	-0.18901
ChCl-LEV (1 : 5)	313.15	73.1	0	0	0.504571	5.70588	3.71115	0.985794	1.19161	2.31079	1.03649	0.000646	-5.7446	Training	-5.60767	0.00537118	-0.206869
ChCl-LEV (1 : 5)	313.15	200.1	0	0	0.504571	5.70588	3.71115	0.985794	1.19161	2.31079	1.03649	0.000646	-4.646	Testing	-4.68542	0.00532527	0.0809276
ChCl-LEV (1 : 5)	313.15	308.4	0	0	0.504571	5.70588	3.71115	0.985794	1.19161	2.31079	1.03649	0.000646	-4.1865	Testing	-4.20692	0.00530524	0.243859
ChCl-LEV (1 : 5)	313.15	412.2	0	0	0.504571	5.70588	3.71115	0.985794	1.19161	2.31079	1.03649	0.000646	-3.912	Testing	-3.91897	0.00530258	0.149746
ChCl-LEV (1 : 5)	313.15	511.4	0	0	0.504571	5.70588	3.71115	0.985794	1.19161	2.31079	1.03649	0.000646	-3.6969	Training	-3.72703	0.00531514	-0.0140353
ChCl-LEV (1 : 5)	313.15	573.7	0	0	0.504571	5.70588	3.71115	0.985794	1.19161	2.31079	1.03649	0.000646	-3.572	Training	-3.62899	0.00533058	-0.165881
ChCl-LEV (1 : 5)	323.15	75.6	0	0	0.504571	5.70588	3.71115	0.985794	1.19161	2.31079	1.03649	0.000646	-5.8091	Training	-5.73624	0.00554994	0.106445
ChCl-LEV (1 : 5)	323.15	208.8	0	0	0.504571	5.70588	3.71115	0.985794	1.19161	2.31079	1.03649	0.000646	-4.7915	Testing	-4.79972	0.00548694	0.0916193
ChCl-LEV (1 : 5)	323.15	315.9	0	0	0.504571	5.70588	3.71115	0.985794	1.19161	2.31079	1.03649	0.000646	-4.3583	Training	-4.35274	0.0054556	0.267335
ChCl-LEV (1 : 5)	323.15	418.4	0	0	0.504571	5.70588	3.71115	0.985794	1.19161	2.31079	1.03649	0.000646	-4.0513	Testing	-4.08507	0.00544174	0.216531
ChCl-LEV (1 : 5)	323.15	517.2	0	0	0.504571	5.70588	3.71115	0.985794	1.19161	2.31079	1.03649	0.000646	-3.849	Training	-3.90632	0.0054433	0.0266925
ChCl-LEV (1 : 5)	323.15	579.9	0	0	0.504571	5.70588	3.71115	0.985794	1.19161	2.31079	1.03649	0.000646	-3.7339	Testing	-3.81495	0.00545189	-0.184157
ChCl-LEV (1 : 5)	333.15	78.9	0	0	0.504571	5.70588	3.71115	0.985794	1.19161	2.31079	1.03649	0.000646	-5.9145	Training	-5.86148	0.00591491	0.308747
ChCl-LEV (1 : 5)	333.15	216.1	0	0	0.504571	5.70588	3.71115	0.985794	1.19161	2.31079	1.03649	0.000646	-4.9063	Testing	-4.92575	0.00583467	0.198023
ChCl-LEV (1 : 5)	333.15	319.2	0	0	0.504571	5.70588	3.71115	0.985794	1.19161	2.31079	1.03649	0.000646	-4.5099	Testing	-4.5137	0.00579297	0.28484
ChCl-LEV (1 : 5)	333.15	417.3	0	0	0.504571	5.70588	3.71115	0.985794	1.19161	2.31079	1.03649	0.000646	-4.2267	Training	-4.26621	0.0057681	0.292675
ChCl-LEV (1 : 5)	333.15	519.7	0	0	0.504571	5.70588	3.71115	0.985794	1.19161	2.31079	1.03649	0.000646	-4.023	Training	-4.08929	0.00575756	0.0393256
ChCl-LEV (1 : 5)	333.15	581	0	0	0.504571	5.70588	3.71115	0.985794	1.19161	2.31079	1.03649	0.000646	-3.917	Testing	-4.00547	0.00575877	-0.183014
Betain-1,2-propanediol (1 : 6)	308.15	189.5	0.000171429	0.312686	0.777214	2.31708	4.07312	1.71206	0.765886	0.977571	1.09636	0.12435	-5.185	Testing	-5.21596	0.00331966	-0.513114
Betain-1,2-propanediol (1 : 6)	308.15	303.3	0.000171429	0.312686	0.777214	2.31708	4.07312	1.71206	0.765886	0.977571	1.09636	0.12435	-4.756	Training	-4.68262	0.00324078	-0.469634
Betain-1,2-propanediol (1 : 6)	308.15	403.8	0.000171429	0.312686	0.777214	2.31708	4.07312	1.71206	0.765886	0.977571	1.09636	0.12435	-4.4312	Training	-4.37791	0.00318729	-0.423015
Betain-1,2-propanediol (1 : 6)	308.15	505	0.000171429	0.312686	0.777214	2.31708	4.07312	1.71206	0.765886	0.977571	1.09636	0.12435	-4.1997	Testing	-4.15378	0.00314875	-0.626135
Betain-1,2-propanediol (1 : 6)	308.15	604.5	0.000171429	0.312686	0.777214	2.31708	4.07312	1.71206	0.765886	0.977571	1.09636	0.12435	-4.0063	Training	-3.97371	0.00312584	-0.858908
Betain-1,2-propanediol (1 : 6)	318.15	208	0.000171429	0.312686	0.777214	2.31708	4.07312	1.71206	0.765886	0.977571	1.09636	0.12435	-5.2983	Training	-5.29977	0.0037573	-0.574978
Betain-1,2-propanediol (1 : 6)	318.15	318	0.000171429	0.312686	0.777214	2.31708	4.07312	1.71206	0.765886	0.977571	1.09636	0.12435	-4.8536	Testing	-4.81334	0.00367062	-0.392712
Betain-1,2-propanediol (1 : 6)	318.15	423.8	0.000171429	0.312686	0.777214	2.31708	4.07312	1.71206	0.765886	0.977571	1.09636	0.12435	-4.5282	Testing	-4.50539	0.00360438	-0.382912
Betain-1,2-propanediol (1 : 6)	318.15	529.8	0.000171429	0.312686	0.777214	2.31708	4.07312	1.71206	0.765886	0.977571	1.09636	0.12435	-4.2904	Training	-4.27719	0.00355487	-0.552491
Betain-1,2-propanediol (1 : 6)	318.15	634.3	0.000171429	0.312686	0.777214	2.31708	4.07312	1.71206	0.765886	0.977571	1.09636	0.12435	-4.0984	Testing	-4.09066	0.00352257	-0.867852
Betain-1,2-propanediol (1 : 6)	328.15	213	0.000171429	0.312686	0.777214	2.31708	4.07312	1.71206	0.765886	0.977571	1.09636	0.12435	-5.4037	Training	-5.44413	0.00439152	-0.403082
Betain-1,2-propanediol (1 : 6)	328.15	332.5	0.000171429	0.312686	0.777214	2.31708	4.07312	1.71206	0.765886	0.977571	1.09636	0.12435	-4.9477	Testing	-4.92867	0.00428478	-0.279558
Betain-1,2-propanediol (1 : 6)	328.15	443.3	0.000171429	0.312686	0.777214	2.31708	4.07312	1.71206	0.765886	0.977571	1.09636	0.12435	-4.6254	Training	-4.61746	0.00420496	-0.281727
Betain-1,2-propanediol (1 : 6)	328.15	552.8	0.000171429	0.312686	0.777214	2.31708	4.07312	1.71206	0.765886	0.977571	1.09636	0.12435	-4.3583	Testing	-4.38697	0.00414418	-0.463502
Betain-1,2-propanediol (1 : 6)	328.15	663.3	0.000171429	0.312686	0.777214	2.31708	4.07312	1.71206	0.765886	0.977571	1.09636	0.12435	-4.1865	Testing	-4.19216	0.0041011	-0.842822
Betain-1,2-propanediol (1 : 6)	338.15	217.3	0.000171429	0.312686	0.777214	2.31708	4.07312	1.71206	0.765886	0.977571	1.09636	0.12435	-5.4968	Training	-5.57996	0.0052127	-0.189584
Betain-1,2-propanediol (1 : 6)	338.15	346.5	0.000171429	0.312686	0.777214	2.31708	4.07312	1.71206	0.765886	0.977571	1.09636	0.12435	-5.036	Training	-5.03444	0.00508359	-0.115785
Betain-1,2-propanediol (1 : 6)	338.15	461.8	0.000171429	0.312686	0.777214	2.31708	4.07312	1.71206	0.765886	0.977571	1.09636	0.12435	-4.6995	Training	-4.72038	0.00498952	-0.14773
Betain-1,2-propanediol (1 : 6)	338.15	576	0.000171429	0.312686	0.777214	2.31708	4.07312	1.71206	0.765886	0.977571	1.09636	0.12435	-4.4312	Training	-4.48485	0.00491602	-0.333032
Betain-1,2-propanediol (1 : 6)	338.15	691.5	0.000171429	0.312686	0.777214	2.31708	4.07312	1.71206	0.765886	0.977571	1.09636	0.12435	-4.2545	Testing	-4.28418	0.0048616	-0.76557
Betain-1,2-propanediol (1 : 6)	348.15	226	0.000171429	0.312686	0.777214	2.31708	4.07312	1.71206	0.765886	0.977571	1.09636	0.12435	-5.5728	Testing	-5.68647	0.00621493	-0.0499983
Betain-1,2-propanediol (1 : 6)	348.15	360.3	0.000171429	0.312686	0.777214	2.31708	4.07312	1.71206	0.765886	0.977571	1.09636	0.12435	-5.116	Testing	-5.13632	0.00606689	0.0013231
Betain-1,2-propanediol (1 : 6)	348.15	480.5	0.000171429	0.312686	0.777214	2.31708	4.07312	1.71206	0.765886	0.977571	1.09636	0.12435	-4.7795	Testing	-4.81836	0.00595735	-0.0644748
Betain-1,2-propanediol (1 : 6)	348.15	599.3	0.000171429	0.312686	0.777214	2.31708	4.07312	1.71206	0.765886	0.977571	1.09636	0.12435	-4.5008	Training	-4.57845	0.0058704	-0.222847
Betain-1,2-propanediol (1 : 6)	348.15	719	0.000171429	0.312686	0.777214	2.31708	4.07312	1.71206	0.765886	0.977571	1.09636	0.12435	-4.32	Testing	-4.37413	0.00580422	-0.677597
Betain-diethylene glycol (1 : 6)	308.15	202.8	0	0.124371	0.873214	3.27438	5.68296	1.40691	0.814014	1.39504	1.30534	0.122036	-4.8665	Training	-4.82848	0.00515567	-0.280742
Betain-diethylene glycol (1 : 6)	308.15	312.5	0	0.124371	0.873214	3.27438	5.68296	1.40691	0.814014	1.39504	1.30534	0.122036	-4.4312	Training	-4.35512	0.00514582	-0.103552
Betain-diethylene glycol (1 : 6)	308.15	413.3	0	0.124371	0.873214	3.27438	5.68296	1.40691	0.814014	1.39504	1.30534	0.122036	-4.1227	Training	-4.06678	0.00515269	-0.0976259
Betain-diethylene glycol (1 : 6)	308.15	512.3	0	0.124371	0.873214	3.27438	5.68296	1.40691	0.814014	1.39504	1.30534	0.122036	-3.8922	Training	-3.8536	0.00517429	-0.263205
Betain-diethylene glycol (1 : 6)	308.15	622	0	0.124371	0.873214	3.27438	5.68296	1.40691	0.814014	1.39504	1.30534	0.122036	-3.677	Testing	-3.65572	0.0052154	-0.567056
Betain-diethylene glycol (1 : 6)	318.15	214.5	0	0.124371	0.873214	3.27438	5.68296	1.40691	0.814014	1.39504	1.30534	0.122036	-5.0207	Training	-4.96292	0.00509929	-0.344064
Betain-diethylene glycol (1 : 6)	318.15	330.5	0	0.124371	0.873214	3.27438	5.68296	1.40691	0.814014	1.39504	1.30534	0.122036	-4.5564	Testing	-4.48478	0.00507756	-0.121012
Betain-diethylene glycol (1 : 6)	318.15	437.3	0	0.124371	0.873214	3.27438	5.68296	1.40691	0.814014	1.39504	1.30534	0.122036	-4.2475	Testing	-4.19255	0.00507541	-0.156496
Betain-diethylene glycol (1 : 6)	318.15	540.8	0	0.124371	0.873214	3.27438	5.68296	1.40691	0.814014	1.39504	1.30534	0.122036	-4.0063	Testing	-3.97511	0.00508966	-0.325688
Betain-diethylene glycol (1 : 6)	318.15	656	0	0.124371	0.873214	3.27438	5.68296	1.40691	0.814014	1.39504	1.30534	0.122036	-3.7766	Testing	-3.76833	0.00512443	-0.603866
Betain-diethylene glycol (1 : 6)	328.15	226	0	0.124371	0.873214	3.27438	5.68296	1.40691	0.814014	1.39504	1.30534	0.122036	-5.1499	Training	-5.09944	0.00522775	-0.298029
Betain-diethylene glycol (1 : 6)	328.15	348	0	0.124371	0.873214	3.27438	5.68296	1.40691	0.814014	1.39504	1.30534	0.122036	-4.6886	Testing	-4.61639	0.00519293	-0.117285
Betain-diethylene glycol (1 : 6)	328.15	460.5	0	0.124371	0.873214	3.27438	5.68296	1.40691	0.814014	1.39504	1.30534	0.122036	-4.3741	Testing	-4.31908	0.00518061	-0.179896
Betain-diethylene glycol (1 : 6)	328.15	593.3	0	0.124371	0.873214	3.27438	5.68296	1.40691	0.814014	1.39504	1.30534	0.122036	-4.1166	Training	-4.04931	0.00519053	-0.49119
Betain-diethylene glycol (1 : 6)	328.15	692	0	0.124371	0.873214	3.27438	5.68296	1.40691	0.814014	1.39504	1.30534	0.122036	-3.8971	Testing	-3.87501	0.00521505	-0.703197
Betain-diethylene glycol (1 : 6)	338.15	237	0	0.124371	0.873214	3.27438	5.68296	1.40691	0.814014	1.39504	1.30534	0.122036	-5.2785	Training	-5.24515	0.00554125	-0.239061
Betain-diethylene glycol (1 : 6)	338.15	364.8	0	0.124371	0.873214	3.27438	5.68296	1.40691	0.814014	1.39504	1.30534	0.122036	-4.8036	Training	-4.75641	0.00549212	-0.0334898
Betain-diethylene glycol (1 : 6)	338.15	483	0	0.124371	0.873214	3.27438	5.68296	1.40691	0.814014	1.39504	1.30534	0.122036	-4.483	Testing	-4.45245	0.0054685	-0.157342
Betain-diethylene glycol (1 : 6)	338.15	597.5	0	0.124371	0.873214	3.27438	5.68296	1.40691	0.814014	1.39504	1.30534	0.122036	-4.2267	Training	-4.21882	0.00546563	-0.339673
Betain-diethylene glycol (1 : 6)	338.15	726.8	0	0.124371	0.873214	3.27438	5.68296	1.40691	0.814014	1.39504	1.30534	0.122036	-4.0118	Testing	-3.98878	0.00548604	-0.780638
Betain-diethylene glycol (1 : 6)	348.15	247.5	0	0.124371	0.873214	3.27438	5.68296	1.40691	0.814014	1.39504	1.30534	0.122036	-5.4037	Testing	-5.404	0.00603994	-0.201087
Betain-diethylene glycol (1 : 6)	348.15	381	0	0.124371	0.873214	3.27438	5.68296	1.40691	0.814014	1.39504	1.30534	0.122036	-4.9063	Testing	-4.90858	0.0059753	0.0124958
Betain-diethylene glycol (1 : 6)	348.15	504.5	0	0.124371	0.873214	3.27438	5.68296	1.40691	0.814014	1.39504	1.30534	0.122036	-4.5952	Training	-4.59768	0.00593932	-0.101463
Betain-diethylene glycol (1 : 6)	348.15	624.3	0	0.124371	0.873214	3.27438	5.68296	1.40691	0.814014	1.39504	1.30534	0.122036	-4.3275	Training	-4.35532	0.00592629	-0.328379
Betain-diethylene glycol (1 : 6)	348.15	759.8	0	0.124371	0.873214	3.27438	5.68296	1.40691	0.814014	1.39504	1.30534	0.122036	-4.1105	Testing	-4.11539	0.00593752	-0.808325
Betain-diethanolamine (1 : 6)	313.5	600	0	0.0139286	0.944357	2.98505	5.96831	1.50099	0.831157	1.041	1.40879	0.12975	-2.501	Training	-2.60252	0.0076509	2.75128
[TBA]Br-methyldiethanol amine (1 : 6)	303.15	445.6	0	0.00475714	0.471	3.25016	9.15075	2.85949	0.705307	1.06288	1.60669	0.00379286	-2.2415	Training	-2.35798	0.00604398	3.28801
[TBA]Br-methyldiethanol amine (1 : 6)	303.15	573	0	0.00475714	0.471	3.25016	9.15075	2.85949	0.705307	1.06288	1.60669	0.00379286	-2.1804	Training	-2.11122	0.00605325	2.51806
[TBA]Br-methyldiethanol amine (1 : 6)	303.15	661.7	0	0.00475714	0.471	3.25016	9.15075	2.85949	0.705307	1.06288	1.60669	0.00379286	-2.1062	Testing	-1.96849	0.00607409	1.98056
[TBA]Br-methyldiethanol amine (1 : 6)	303.15	721	0	0.00475714	0.471	3.25016	9.15075	2.85949	0.705307	1.06288	1.60669	0.00379286	-1.9863	Training	-1.88242	0.00609461	1.91471
[TBA]Br-methyldiethanol amine (1 : 6)	303.15	911.2	0	0.00475714	0.471	3.25016	9.15075	2.85949	0.705307	1.06288	1.60669	0.00379286	-1.8925	Training	-1.64535	0.00619605	1.40074
[TBA]Br-methyldiethanol amine (1 : 6)	303.15	1096	0	0.00475714	0.471	3.25016	9.15075	2.85949	0.705307	1.06288	1.60669	0.00379286	-1.797	Testing	-1.46104	0.00634662	1.41421
[TBA]Br-diethanol amine (1 : 6)	303.15	523.4	0	0.0139286	0.852686	3.00639	7.93112	2.59977	0.797921	1.06708	1.62936	0.00885	-3.4358	Training	-3.18107	0.00578745	0.329895
[TBA]Br-diethanol amine (1 : 6)	303.15	663.5	0	0.0139286	0.852686	3.00639	7.93112	2.59977	0.797921	1.06708	1.62936	0.00885	-2.9858	Training	-2.95824	0.00576979	0.388308
[TBA]Br-diethanol amine (1 : 6)	303.15	710	0	0.0139286	0.852686	3.00639	7.93112	2.59977	0.797921	1.06708	1.62936	0.00885	-2.8336	Training	-2.89328	0.00577044	0.414417
[TBA]Br-diethanol amine (1 : 6)	303.15	814	0	0.0139286	0.852686	3.00639	7.93112	2.59977	0.797921	1.06708	1.62936	0.00885	-2.6465	Training	-2.76044	0.00578365	0.110334
[TBA]Br-diethanol amine (1 : 6)	303.15	971	0	0.0139286	0.852686	3.00639	7.93112	2.59977	0.797921	1.06708	1.62936	0.00885	-2.4068	Training	-2.58844	0.00583434	0.519118
[ATPP]Br-Phenol (1 : 6)	313.15	183.3	0.041538	0.475623	0.306298	3.49134	3.5369	4.58188	2.64211	0.712915	0.431566	0.00826	-3.7091	Testing	-3.65751	0.00601186	2.67528
[ATPP]Br-Phenol (1 : 6)	313.15	409.8	0.041538	0.475623	0.306298	3.49134	3.5369	4.58188	2.64211	0.712915	0.431566	0.00826	-2.8302	Training	-2.75192	0.00579876	2.86852
[ATPP]Br-Phenol (1 : 6)	313.15	669	0.041538	0.475623	0.306298	3.49134	3.5369	4.58188	2.64211	0.712915	0.431566	0.00826	-2.3969	Testing	-2.36853	0.00564938	1.95678
[ATPP]Br-Phenol (1 : 6)	313.15	871.7	0.041538	0.475623	0.306298	3.49134	3.5369	4.58188	2.64211	0.712915	0.431566	0.00826	-2.051	Training	-2.1517	0.00560283	1.39556
[ATPP]Br-Phenol (1 : 6)	313.15	1098.5	0.041538	0.475623	0.306298	3.49134	3.5369	4.58188	2.64211	0.712915	0.431566	0.00826	-1.7982	Training	-1.90733	0.00562386	1.81242
[ATPP]Br-Phenol (1 : 6)	313.15	1320.3	0.041538	0.475623	0.306298	3.49134	3.5369	4.58188	2.64211	0.712915	0.431566	0.00826	-1.6348	Testing	-1.67482	0.0057191	1.94627
[ATPP]Br-Phenol (1 : 6)	323.15	159.9	0.041538	0.475623	0.306298	3.49134	3.5369	4.58188	2.64211	0.712915	0.431566	0.00826	-3.8304	Training	-3.92837	0.00654548	3.40773
[ATPP]Br-Phenol (1 : 6)	323.15	327.3	0.041538	0.475623	0.306298	3.49134	3.5369	4.58188	2.64211	0.712915	0.431566	0.00826	-3.0813	Training	-3.08939	0.00635461	3.30895
[ATPP]Br-Phenol (1 : 6)	323.15	567.9	0.041538	0.475623	0.306298	3.49134	3.5369	4.58188	2.64211	0.712915	0.431566	0.00826	-2.5498	Training	-2.60714	0.00615396	2.83872
[ATPP]Br-Phenol (1 : 6)	323.15	818.9	0.041538	0.475623	0.306298	3.49134	3.5369	4.58188	2.64211	0.712915	0.431566	0.00826	-2.3645	Training	-2.32705	0.00603725	1.47528
[ATPP]Br-Phenol (1 : 6)	323.15	1088.3	0.041538	0.475623	0.306298	3.49134	3.5369	4.58188	2.64211	0.712915	0.431566	0.00826	-2.0542	Training	-2.04122	0.0060172	1.46472
[ATPP]Br-Phenol (1 : 6)	323.15	1328.9	0.041538	0.475623	0.306298	3.49134	3.5369	4.58188	2.64211	0.712915	0.431566	0.00826	-1.814	Testing	-1.79693	0.00609139	1.76873
[ATPP]Br-Phenol (1 : 6)	333.15	191.2	0.041538	0.475623	0.306298	3.49134	3.5369	4.58188	2.64211	0.712915	0.431566	0.00826	-3.8538	Testing	-3.84338	0.00719742	3.20237
[ATPP]Br-Phenol (1 : 6)	333.15	457.2	0.041538	0.475623	0.306298	3.49134	3.5369	4.58188	2.64211	0.712915	0.431566	0.00826	-2.9565	Training	-2.90125	0.00689443	3.11365
[ATPP]Br-Phenol (1 : 6)	333.15	700.8	0.041538	0.475623	0.306298	3.49134	3.5369	4.58188	2.64211	0.712915	0.431566	0.00826	-2.5498	Testing	-2.57631	0.00671013	2.24522
[ATPP]Br-Phenol (1 : 6)	333.15	978.4	0.041538	0.475623	0.306298	3.49134	3.5369	4.58188	2.64211	0.712915	0.431566	0.00826	-2.3177	Training	-2.27843	0.0066087	1.17881
[ATPP]Br-Phenol (1 : 6)	333.15	1123.6	0.041538	0.475623	0.306298	3.49134	3.5369	4.58188	2.64211	0.712915	0.431566	0.00826	-2.1481	Training	-2.1239	0.00660172	1.46402
[ATPP]Br-Phenol (1 : 6)	333.15	1387.3	0.041538	0.475623	0.306298	3.49134	3.5369	4.58188	2.64211	0.712915	0.431566	0.00826	-1.9139	Testing	-1.86734	0.00666997	1.73607
TPACl-AC (1 : 6)	298.15	350	0.055728	0.440449	0.304872	2.59145	3.99365	1.44816	0.932974	1.52209	0.640957	0.04466	-3.8899	Testing	-3.65049	0.00902063	0.134769
TPACl-AC (1 : 6)	298.15	554	0.055728	0.440449	0.304872	2.59145	3.99365	1.44816	0.932974	1.52209	0.640957	0.04466	-3.2581	Training	-3.23887	0.00885868	0.203734
TPACl-AC (1 : 6)	298.15	826	0.055728	0.440449	0.304872	2.59145	3.99365	1.44816	0.932974	1.52209	0.640957	0.04466	-2.871	Testing	-2.91479	0.00873991	-0.852869
TPACl-AC (1 : 6)	298.15	1220	0.055728	0.440449	0.304872	2.59145	3.99365	1.44816	0.932974	1.52209	0.640957	0.04466	-2.5577	Training	-2.59346	0.00876481	-0.454471
TPACl-AC (1 : 6)	298.15	1652	0.055728	0.440449	0.304872	2.59145	3.99365	1.44816	0.932974	1.52209	0.640957	0.04466	-2.2781	Training	-2.30744	0.00905994	-0.1379
TPACl-AC (1 : 6)	298.15	2030	0.055728	0.440449	0.304872	2.59145	3.99365	1.44816	0.932974	1.52209	0.640957	0.04466	-2.0778	Testing	-2.05871	0.00954797	-0.00236273
[TBA]Br-EA (1 : 6)	298.15	1000	0	0	0.72369	2.48738	5.11787	1.76936	0.54614	0.813487	1.26958	0.016194	-2.1497	Training	-2.27402	0.00783807	1.13999
[TBA]Br-DEA (1 : 6)	298.15	1000	0	0.013975	0.857635	3.12769	7.11492	2.13211	0.796916	1.05665	1.64106	0.007852	-2.2509	Testing	-2.75239	0.00524937	0.825389
[MTPP]Br-EA (1 : 6)	298.15	1000	0	0	0.792535	2.86152	4.5214	2.54737	0.587874	0.834536	1.25044	0.01639	-1.9379	Testing	-2.19965	0.0113657	1.65764
[Ch]Cl-EA (1 : 7)	298.15	182	0	0	0.8781	2.447	3.9194	1.1286	0.6251	0.8928	1.1939	0.0168	-2.9439	Training	-3.04095	0.010342	4.45725
[Ch]Cl-EA (1 : 7)	298.15	346	0	0	0.8781	2.447	3.9194	1.1286	0.6251	0.8928	1.1939	0.0168	-2.1301	Training	-2.40522	0.0100914	5.02318
[Ch]Cl-EA (1 : 7)	298.15	651	0	0	0.8781	2.447	3.9194	1.1286	0.6251	0.8928	1.1939	0.0168	-1.8284	Testing	-1.92247	0.00973287	3.44183
[Ch]Cl-EA (1 : 7)	298.15	1010	0	0	0.8781	2.447	3.9194	1.1286	0.6251	0.8928	1.1939	0.0168	-1.7894	Training	-1.65389	0.00948972	2.17447
[Ch]Cl-EA (1 : 7)	298.15	1365	0	0	0.8781	2.447	3.9194	1.1286	0.6251	0.8928	1.1939	0.0168	-1.6922	Testing	-1.53742	0.00943953	2.04362
[Ch]Cl-EA (1 : 7)	298.15	1741	0	0	0.8781	2.447	3.9194	1.1286	0.6251	0.8928	1.1939	0.0168	-1.6129	Training	-1.51627	0.00959265	2.00882
[Ch]Cl-EA (1 : 7)	298.15	2035	0	0	0.8781	2.447	3.9194	1.1286	0.6251	0.8928	1.1939	0.0168	-1.5964	Training	-1.53456	0.00986023	1.81336
[TBA]Br-EA (1 : 7)	298.15	381	0	0	0.7233	2.2906	5.7022	2.1151	0.5571	0.8224	1.2075	0.0174	-3.0452	Training	-2.68426	0.00858262	2.23717
[TBA]Br-EA (1 : 7)	298.15	637	0	0	0.7233	2.2906	5.7022	2.1151	0.5571	0.8224	1.2075	0.0174	-2.2855	Training	-2.26559	0.00832347	2.19597
[TBA]Br-EA (1 : 7)	298.15	940	0	0	0.7233	2.2906	5.7022	2.1151	0.5571	0.8224	1.2075	0.0174	-1.7885	Testing	-1.98742	0.00814386	1.83329
[TBA]Br-EA (1 : 7)	298.15	1251	0	0	0.7233	2.2906	5.7022	2.1151	0.5571	0.8224	1.2075	0.0174	-1.6145	Testing	-1.82117	0.00810283	1.99347
[TBA]Br-EA (1 : 7)	298.15	1627	0	0	0.7233	2.2906	5.7022	2.1151	0.5571	0.8224	1.2075	0.0174	-1.5462	Training	-1.72137	0.0082471	1.93165
[TBA]Br-EA (1 : 7)	298.15	2040	0	0	0.7233	2.2906	5.7022	2.1151	0.5571	0.8224	1.2075	0.0174	-1.5141	Testing	-1.6751	0.00865014	1.60932
[TPA]Cl-EA (1 : 7)	298.15	357	0	0	0.7089	2.3624	5.0486	1.7429	0.5507	0.7466	1.1803	0.0562	-2.1026	Testing	-2.60462	0.00914967	4.63017
[TPA]Cl-EA (1 : 7)	298.15	645	0	0	0.7089	2.3624	5.0486	1.7429	0.5507	0.7466	1.1803	0.0562	-1.9469	Training	-2.10483	0.00890711	3.0605
[TPA]Cl-EA (1 : 7)	298.15	952	0	0	0.7089	2.3624	5.0486	1.7429	0.5507	0.7466	1.1803	0.0562	-1.7213	Testing	-1.81285	0.00878564	2.07224
[TPA]Cl-EA (1 : 7)	298.15	1232	0	0	0.7089	2.3624	5.0486	1.7429	0.5507	0.7466	1.1803	0.0562	-1.5897	Testing	-1.65106	0.00879821	2.15838
[TPA]Cl-EA (1 : 7)	298.15	1673	0	0	0.7089	2.3624	5.0486	1.7429	0.5507	0.7466	1.1803	0.0562	-1.5218	Training	-1.53135	0.00905666	2.04708
[TPA]Cl-EA (1 : 7)	298.15	2019	0	0	0.7089	2.3624	5.0486	1.7429	0.5507	0.7466	1.1803	0.0562	-1.503	Testing	-1.4969	0.00946381	1.74403
[TBA]Br-methyldiethanol amine (1 : 7)	303.15	594.5	0	0.00485625	0.469919	3.19092	8.97916	2.74934	0.7177	1.06553	1.56234	0.00370625	-2.1672	Testing	-2.08226	0.00592441	2.31821
[TBA]Br-methyldiethanol amine (1 : 7)	303.15	674.3	0	0.00485625	0.469919	3.19092	8.97916	2.74934	0.7177	1.06553	1.56234	0.00370625	-2.0596	Testing	-1.95707	0.00594284	2.0061
[TBA]Br-methyldiethanol amine (1 : 7)	303.15	723.4	0	0.00485625	0.469919	3.19092	8.97916	2.74934	0.7177	1.06553	1.56234	0.00370625	-1.9661	Testing	-1.88649	0.00595894	1.87733
[TBA]Br-methyldiethanol amine (1 : 7)	303.15	802.5	0	0.00485625	0.469919	3.19092	8.97916	2.74934	0.7177	1.06553	1.56234	0.00370625	-1.8183	Training	-1.7815	0.00599248	1.73327
[TBA]Br-methyldiethanol amine (1 : 7)	303.15	940.7	0	0.00485625	0.469919	3.19092	8.97916	2.74934	0.7177	1.06553	1.56234	0.00370625	-1.6634	Testing	-1.62016	0.00607362	1.84052
[TBA]Br-methyldiethanol amine (1 : 7)	303.15	1034.5	0	0.00485625	0.469919	3.19092	8.97916	2.74934	0.7177	1.06553	1.56234	0.00370625	-1.6165	Testing	-1.5246	0.00614502	1.87589
[MTPP]Br-EA (1 : 7)	298.15	1000	0	0	0.7882	2.7421	4.4691	2.4087	0.5914	0.8315	1.2072	0.0166	-2.0762	Training	-2.05331	0.0112221	1.37937
[MTPP]Br-EA (1 : 8)	298.15	1000	0	0	0.7838	2.6227	4.4167	2.2701	0.595	0.8285	1.1639	0.0169	-2.1295	Testing	-1.87924	0.0112266	1.17211
[ATPP]Br-DEG (1 : 10)	303.15	156	0	0.132041	0.810173	3.38417	6.34045	2.40782	0.902994	1.46463	1.3171	0.00531	-3.5614	Training	-3.73921	0.00252653	3.19657
[ATPP]Br-DEG (1 : 10)	303.15	340	0	0.132041	0.810173	3.38417	6.34045	2.40782	0.902994	1.46463	1.3171	0.00531	-2.763	Training	-2.8621	0.00235335	3.21001
[ATPP]Br-DEG (1 : 10)	303.15	490	0	0.132041	0.810173	3.38417	6.34045	2.40782	0.902994	1.46463	1.3171	0.00531	-2.3655	Training	-2.46321	0.00224977	3.07324
[ATPP]Br-DEG (1 : 10)	303.15	734	0	0.132041	0.810173	3.38417	6.34045	2.40782	0.902994	1.46463	1.3171	0.00531	-1.929	Testing	-2.01847	0.00215343	2.27186
[ATPP]Br-DEG (1 : 10)	303.15	884	0	0.132041	0.810173	3.38417	6.34045	2.40782	0.902994	1.46463	1.3171	0.00531	-1.7142	Training	-1.80337	0.00213857	2.18452
[ATPP]Br-TEG (1 : 10)	303.15	149	0	0	0.061016	5.31264	7.38641	2.6234	1.31572	1.46186	1.26605	0.0224635	-3.52	Testing	-3.6048	0.0071232	2.6273
[ATPP]Br-TEG (1 : 10)	303.15	331	0	0	0.061016	5.31264	7.38641	2.6234	1.31572	1.46186	1.26605	0.0224635	-2.7211	Testing	-2.75313	0.00716013	2.53839
[ATPP]Br-TEG (1 : 10)	303.15	491	0	0	0.061016	5.31264	7.38641	2.6234	1.31572	1.46186	1.26605	0.0224635	-2.2926	Training	-2.35107	0.00723367	2.4906
[ATPP]Br-TEG (1 : 10)	303.15	744	0	0	0.061016	5.31264	7.38641	2.6234	1.31572	1.46186	1.26605	0.0224635	-1.8689	Testing	-1.91415	0.00742837	1.60765
[ATPP]Br-TEG (1 : 10)	303.15	880	0	0	0.061016	5.31264	7.38641	2.6234	1.31572	1.46186	1.26605	0.0224635	-1.6761	Training	-1.71704	0.00757274	1.66867
[ATPP]Br-TEG (1 : 10)	303.15	1080	0	0	0.061016	5.31264	7.38641	2.6234	1.31572	1.46186	1.26605	0.0224635	-1.4529	Training	-1.45892	0.00783548	2.0369
[ATPP]Br-TEG (1 : 10)	303.15	1468	0	0	0.061016	5.31264	7.38641	2.6234	1.31572	1.46186	1.26605	0.0224635	-1.1215	Testing	-1.04472	0.00851643	2.42584
[ATPP]Br-TEG (1 : 10)	303.15	1953	0	0	0.061016	5.31264	7.38641	2.6234	1.31572	1.46186	1.26605	0.0224635	-0.7987	Testing	-0.613865	0.0096854	2.7949
[ATPP]Br-DEG (1 : 16)	303.15	166	0	0.136394	0.814999	3.19923	6.23439	2.12708	0.899496	1.47709	1.26395	0.00354	-3.7423	Testing	-3.73952	0.00351888	2.50072
[ATPP]Br-DEG (1 : 16)	303.15	325	0	0.136394	0.814999	3.19923	6.23439	2.12708	0.899496	1.47709	1.26395	0.00354	-3.0386	Training	-2.99672	0.00336497	2.6695
[ATPP]Br-DEG (1 : 16)	303.15	490	0	0.136394	0.814999	3.19923	6.23439	2.12708	0.899496	1.47709	1.26395	0.00354	-2.5836	Testing	-2.55942	0.00324538	2.47482
[ATPP]Br-DEG (1 : 16)	303.15	742	0	0.136394	0.814999	3.19923	6.23439	2.12708	0.899496	1.47709	1.26395	0.00354	-2.1078	Training	-2.1177	0.0031416	1.87726
[ATPP]Br-DEG (1 : 16)	303.15	880	0	0.136394	0.814999	3.19923	6.23439	2.12708	0.899496	1.47709	1.26395	0.00354	-1.9045	Training	-1.92845	0.00312516	1.72299
[ATPP]Br-DEG (1 : 16)	303.15	1105	0	0.136394	0.814999	3.19923	6.23439	2.12708	0.899496	1.47709	1.26395	0.00354	-1.6337	Training	-1.67855	0.00315966	2.18384
[ATPP]Br-DEG (1 : 16)	303.15	1471	0	0.136394	0.814999	3.19923	6.23439	2.12708	0.899496	1.47709	1.26395	0.00354	-1.2906	Testing	-1.39779	0.00337812	2.61421
[ATPP]Br-TEG (1 : 16)	303.15	146	0	0	0.041144	5.19128	7.31482	2.34977	1.32583	1.47422	1.21122	0.021259	-3.7723	Testing	-3.7346	0.00834411	2.06983
[ATPP]Br-TEG (1 : 16)	303.15	323	0	0	0.041144	5.19128	7.31482	2.34977	1.32583	1.47422	1.21122	0.021259	-2.9701	Training	-2.89896	0.00838124	2.07333
[ATPP]Br-TEG (1 : 16)	303.15	492	0	0	0.041144	5.19128	7.31482	2.34977	1.32583	1.47422	1.21122	0.021259	-2.4937	Training	-2.47075	0.00846058	1.98673
[ATPP]Br-TEG (1 : 16)	303.15	744	0	0	0.041144	5.19128	7.31482	2.34977	1.32583	1.47422	1.21122	0.021259	-2.0333	Training	-2.0334	0.0086585	1.26657
[ATPP]Br-TEG (1 : 16)	303.15	887	0	0	0.041144	5.19128	7.31482	2.34977	1.32583	1.47422	1.21122	0.021259	-1.8245	Training	-1.82442	0.00881322	1.27735
[ATPP]Br-TEG (1 : 16)	303.15	1070	0	0	0.041144	5.19128	7.31482	2.34977	1.32583	1.47422	1.21122	0.021259	-1.5823	Training	-1.58426	0.00905598	1.70407
[ATPP]Br-TEG (1 : 16)	303.15	1471	0	0	0.041144	5.19128	7.31482	2.34977	1.32583	1.47422	1.21122	0.021259	-1.2532	Testing	-1.14167	0.00976369	2.08404
[ATPP]Br-TEG (1 : 16)	303.15	1957	0	0	0.041144	5.19128	7.31482	2.34977	1.32583	1.47422	1.21122	0.021259	-0.885	Testing	-0.686389	0.010945	2.55755
[Ch]Cl-ethylenecyanohydrin (1 : 2)	298.15	110.4	0.001452	0.217668	1.04931	4.68984	2.2988	0.934789	1.25324	1.64179	1.52429	0.001292	-4.7712	Training	-4.90041	0.00365924	1.73942
[Ch]Cl-ethylenecyanohydrin (1 : 2)	298.15	448.1	0.001452	0.217668	1.04931	4.68984	2.2988	0.934789	1.25324	1.64179	1.52429	0.001292	-3.3473	Training	-3.3785	0.00340271	1.72117
[Ch]Cl-ethylenecyanohydrin (1 : 2)	298.15	802.8	0.001452	0.217668	1.04931	4.68984	2.2988	0.934789	1.25324	1.64179	1.52429	0.001292	-2.7962	Training	-2.79339	0.00331759	0.478329
[Ch]Cl-ethylenecyanohydrin (1 : 2)	298.15	1119.4	0.001452	0.217668	1.04931	4.68984	2.2988	0.934789	1.25324	1.64179	1.52429	0.001292	-2.5051	Training	-2.42475	0.00340113	0.863271
[Ch]Cl-ethylenecyanohydrin (1 : 2)	298.15	1407.8	0.001452	0.217668	1.04931	4.68984	2.2988	0.934789	1.25324	1.64179	1.52429	0.001292	-2.2541	Training	-2.21581	0.00360819	1.22674
[Ch]Cl-ethylenecyanohydrin (1 : 2)	328.15	121.9	0.001452	0.217668	1.04931	4.68984	2.2988	0.934789	1.25324	1.64179	1.52429	0.001292	-5.0752	Testing	-5.17991	0.00288254	2.26458
[Ch]Cl-ethylenecyanohydrin (1 : 2)	328.15	408.2	0.001452	0.217668	1.04931	4.68984	2.2988	0.934789	1.25324	1.64179	1.52429	0.001292	-3.8005	Training	-3.85214	0.00255602	2.26196
[Ch]Cl-ethylenecyanohydrin (1 : 2)	328.15	736.2	0.001452	0.217668	1.04931	4.68984	2.2988	0.934789	1.25324	1.64179	1.52429	0.001292	-3.2358	Testing	-3.28064	0.00233316	1.18259
[Ch]Cl-ethylenecyanohydrin (1 : 2)	328.15	937.5	0.001452	0.217668	1.04931	4.68984	2.2988	0.934789	1.25324	1.64179	1.52429	0.001292	-3.0241	Training	-3.03795	0.00227636	0.529599
[Ch]Cl-ethylenecyanohydrin (1 : 2)	328.15	1140.2	0.001452	0.217668	1.04931	4.68984	2.2988	0.934789	1.25324	1.64179	1.52429	0.001292	-2.7589	Training	-2.85143	0.00228062	0.994989
[Ch]Cl-ethylenecyanohydrin (1 : 2)	328.15	1409.5	0.001452	0.217668	1.04931	4.68984	2.2988	0.934789	1.25324	1.64179	1.52429	0.001292	-2.5699	Testing	-2.69718	0.00238169	1.16709
[Ch]Cl-ethylenecyanohydrin (1 : 3)	298.15	112.5	0.00165	0.24735	0.952237	4.32776	2.1863	1.02764	1.33484	1.66129	1.23759	0.00095	-4.7712	Testing	-5.02955	0.00307577	1.44794
[Ch]Cl-ethylenecyanohydrin (1 : 3)	298.15	404.4	0.00165	0.24735	0.952237	4.32776	2.1863	1.02764	1.33484	1.66129	1.23759	0.00095	-3.5422	Training	-3.59867	0.00281331	1.38581
[Ch]Cl-ethylenecyanohydrin (1 : 3)	298.15	796.9	0.00165	0.24735	0.952237	4.32776	2.1863	1.02764	1.33484	1.66129	1.23759	0.00095	-2.9171	Testing	-2.91318	0.002662	0.00977416
[Ch]Cl-ethylenecyanohydrin (1 : 3)	298.15	1134.6	0.00165	0.24735	0.952237	4.32776	2.1863	1.02764	1.33484	1.66129	1.23759	0.00095	-2.5909	Training	-2.52467	0.00271689	0.424645
[Ch]Cl-ethylenecyanohydrin (1 : 3)	298.15	1409.5	0.00165	0.24735	0.952237	4.32776	2.1863	1.02764	1.33484	1.66129	1.23759	0.00095	-2.379	Training	-2.33061	0.00288797	0.706432
[Ch]Cl-ethylenecyanohydrin (1 : 3)	328.15	112.5	0.00165	0.24735	0.952237	4.32776	2.1863	1.02764	1.33484	1.66129	1.23759	0.00095	-5.5967	Testing	-5.50178	0.00325655	1.03596
[Ch]Cl-ethylenecyanohydrin (1 : 3)	328.15	421.4	0.00165	0.24735	0.952237	4.32776	2.1863	1.02764	1.33484	1.66129	1.23759	0.00095	-4.0325	Training	-4.03004	0.00287167	1.43047
[Ch]Cl-ethylenecyanohydrin (1 : 3)	328.15	816	0.00165	0.24735	0.952237	4.32776	2.1863	1.02764	1.33484	1.66129	1.23759	0.00095	-3.3405	Training	-3.36409	0.00258837	0.234389
[Ch]Cl-ethylenecyanohydrin (1 : 3)	328.15	1138.5	0.00165	0.24735	0.952237	4.32776	2.1863	1.02764	1.33484	1.66129	1.23759	0.00095	-3.0141	Testing	-3.01926	0.00253041	0.130058
[Ch]Cl-ethylenecyanohydrin (1 : 3)	328.15	1405.7	0.00165	0.24735	0.952237	4.32776	2.1863	1.02764	1.33484	1.66129	1.23759	0.00095	-2.8203	Training	-2.8466	0.00260064	0.414441
