# Supplementary material for: Accurate prediction of carbon dioxide capture by deep eutectic solvents using quantum chemistry and a neural network
Source: Royal Society of Chemistry journal article supplement (doi:10.1039/d2gc04425k), 2023-01-01
Supplement: d2gc04425k2.pdf [file d2gc04425k2.pdf]

## *Supporting Information*

### **Accurate Prediction of Carbon Dioxide Capture by Deep Eutectic Solvents using Quantum Chemistry and a Neural Network**

Mood Mohan<sup>\*,1,2,3</sup>, Omar Demerdash<sup>3</sup>, Blake A. Simmons<sup>1,4</sup>, Jeremy C. Smith<sup>3,5</sup>, Michelle Kidder<sup>6</sup>, and Seema Singh<sup>\*,1,2</sup>

<sup>1</sup> Deconstruction Division, Joint BioEnergy Institute, 5885 Hollis Street, Emeryville, California 94608, United States

<sup>2</sup> Bioresource and Environmental Security Department, Sandia National Laboratories, 7011 East Avenue, Livermore, California 94551, United States

<sup>3</sup> Center for Molecular Biophysics, Oak Ridge National Laboratory, Oak Ridge, Tennessee 37831, United States

<sup>4</sup> Biological Systems and Engineering Division, Lawrence Berkeley National Laboratory, 1 Cyclotron Road, Berkeley, California 94720, United States

<sup>5</sup> Department of Biochemistry and Cellular and Molecular Biology, University of Tennessee, Knoxville, Tennessee 37996, United States

<sup>6</sup> Manufacturing Science Division, Oak Ridge National Laboratory, Oak Ridge, Tennessee 37831-6201, United States

\*Corresponding Author

E-mail: [moodm@ornl.gov](mailto:moodm@ornl.gov); [mohanchauhan08@gmail.com](mailto:mohanchauhan08@gmail.com) (M. Mohan)

[Seema.Rose.Singh@gmail.com](mailto:Seema.Rose.Singh@gmail.com) (S. Singh)

Cartesian coordinates (in Å) of all the molecules investigated in this study (CO<sub>2</sub>, HBA, and HBD). The molecules were optimized at B3LYP/6-311++G(d,p) level of theory and basis set.

**Carbon dioxide (CO<sub>2</sub>)**

|   |          |         |         |
|---|----------|---------|---------|
| C | 0.00000  | 0.00000 | 0.00000 |
| O | 1.17200  | 0.00000 | 0.00000 |
| O | -1.17200 | 0.00000 | 0.00000 |

**HBA's**

**[Ach]Cl**

|    |          |          |          |
|----|----------|----------|----------|
| N  | -1.39600 | -0.20000 | -0.08200 |
| C  | -1.94100 | 1.19400  | -0.26100 |
| C  | -2.47000 | -1.18400 | -0.48000 |
| C  | -1.03200 | -0.42600 | 1.36100  |
| H  | -1.19400 | 1.92100  | 0.07100  |
| H  | -2.84100 | 1.28700  | 0.35400  |
| H  | -2.17800 | 1.32900  | -1.32500 |
| H  | -0.28800 | 0.31400  | 1.66400  |
| H  | -0.62600 | -1.43700 | 1.46500  |
| H  | -1.94200 | -0.31700 | 1.96000  |
| H  | -2.07900 | -2.19900 | -0.34700 |
| H  | -2.72500 | -0.99800 | -1.53200 |
| H  | -3.33800 | -1.02400 | 0.16700  |
| C  | -0.21000 | -0.43700 | -1.01800 |
| H  | 0.06100  | -1.49500 | -0.91400 |
| C  | 1.00500  | 0.44200  | -0.82400 |
| H  | -0.61400 | -0.26700 | -2.03100 |
| H  | 0.76100  | 1.50200  | -0.67600 |
| H  | 1.61600  | 0.36500  | -1.73300 |
| O  | 1.78100  | -0.04300 | 0.31100  |
| C  | 2.98200  | 0.56600  | 0.51400  |
| O  | 3.38200  | 1.48900  | -0.18200 |
| C  | 3.73400  | -0.06200 | 1.65300  |
| H  | 4.41300  | 0.67500  | 2.09700  |
| H  | 4.33600  | -0.89300 | 1.25700  |
| H  | 3.05500  | -0.46600 | 2.41300  |
| Cl | -2.25300 | 0.36200  | -3.88300 |

**[Ch]Cl**

|    |          |          |          |
|----|----------|----------|----------|
| N  | 0.01800  | -0.73300 | -0.10100 |
| C  | -0.11100 | 0.37600  | 0.94600  |
| C  | -0.58400 | -1.98600 | 0.48300  |
| C  | 1.45900  | -1.00000 | -0.44100 |
| H  | 1.49800  | -1.88100 | -1.09000 |
| H  | 2.01200  | -1.18800 | 0.48500  |
| H  | 1.87100  | -0.13400 | -0.96700 |
| H  | -0.56300 | -2.77000 | -0.28200 |
| H  | -1.61600 | -1.77200 | 0.77900  |
| H  | 0.00700  | -2.28800 | 1.35400  |
| C  | 0.69900  | 1.64800  | 0.70400  |
| H  | 0.21500  | -0.06900 | 1.89600  |
| H  | -1.18400 | 0.60000  | 1.01100  |
| H  | 0.54400  | 2.25900  | 1.61200  |
| O  | 0.36100  | 2.37200  | -0.47500 |
| H  | 1.77300  | 1.42300  | 0.65400  |
| C  | -0.73800 | -0.37800 | -1.35900 |
| H  | -0.32600 | 0.55200  | -1.75700 |
| H  | -1.79400 | -0.24700 | -1.10000 |
| H  | -0.62200 | -1.20300 | -2.07000 |
| H  | -0.54600 | 2.78000  | -0.32800 |
| Cl | -2.37100 | 3.64000  | 0.04700  |

**[TOA]Cl**

|   |          |          |          |
|---|----------|----------|----------|
| N | -0.16600 | -0.09700 | 0.28100  |
| C | 1.07100  | -0.53400 | -0.50500 |
| C | -0.22900 | -0.79000 | 1.64300  |
| C | -1.37800 | -0.46500 | -0.58500 |
| C | 2.41500  | -0.25800 | 0.15700  |
| H | 0.99900  | -0.02500 | -1.47400 |
| H | 0.94400  | -1.60800 | -0.69200 |
| H | 2.53400  | 0.81700  | 0.36600  |
| C | 3.56300  | -0.71800 | -0.75800 |
| H | 2.49300  | -0.78600 | 1.11900  |
| H | 3.48800  | -0.19900 | -1.72900 |
| H | 3.45300  | -1.79600 | -0.96900 |
| C | 4.94600  | -0.45800 | -0.14700 |
| H | 5.05400  | 0.62100  | 0.06000  |
| C | 6.10300  | -0.91900 | -1.04400 |
| H | 5.01500  | -0.97000 | 0.82800  |
| H | 6.02800  | -0.41300 | -2.02300 |
| H | 5.99800  | -2.00000 | -1.24600 |
| C | 7.48800  | -0.65000 | -0.44100 |

|   |          |          |          |
|---|----------|----------|----------|
| H | 7.59400  | 0.43200  | -0.24200 |
| C | 8.64800  | -1.11400 | -1.33100 |
| H | 7.56100  | -1.15100 | 0.54100  |
| H | 8.57200  | -0.61500 | -2.31300 |
| H | 8.54300  | -2.19500 | -1.52700 |
| C | 10.02700 | -0.83600 | -0.72200 |
| H | 10.17300 | 0.24100  | -0.54600 |
| H | 10.83700 | -1.18000 | -1.38200 |
| H | 10.14300 | -1.35000 | 0.24600  |
| H | -1.27400 | 0.09600  | -1.52700 |
| C | -2.74900 | -0.20500 | 0.02900  |
| H | -1.25900 | -1.53100 | -0.81700 |
| H | -2.87000 | 0.86100  | 0.27800  |
| H | -2.88500 | -0.77500 | 0.96100  |
| C | -3.84800 | -0.60300 | -0.97300 |
| H | -3.68700 | -0.04400 | -1.90900 |
| C | -5.26000 | -0.35300 | -0.42700 |
| H | -3.74300 | -1.67400 | -1.22300 |
| H | -5.36700 | 0.71500  | -0.16300 |
| H | -5.38200 | -0.91500 | 0.51500  |
| C | -6.38900 | -0.74900 | -1.39400 |
| H | -6.24800 | -1.79900 | -1.70600 |
| C | -6.50600 | 0.14100  | -2.64000 |
| H | -7.34900 | -0.71900 | -0.85000 |
| H | -5.56300 | 0.11800  | -3.21200 |
| H | -6.64500 | 1.19000  | -2.32000 |
| C | -7.66200 | -0.26000 | -3.56700 |
| H | -7.51800 | -1.30600 | -3.89100 |
| C | -7.79300 | 0.64300  | -4.79900 |
| H | -8.60600 | -0.24300 | -2.99600 |
| H | -8.62700 | 0.32800  | -5.44300 |
| H | -6.87400 | 0.62100  | -5.40600 |
| H | -7.97200 | 1.68900  | -4.50600 |
| H | -1.10500 | -0.36700 | 2.15100  |
| H | 0.65800  | -0.45200 | 2.19300  |
| C | -0.30000 | -2.31200 | 1.62100  |
| H | -1.18500 | -2.65400 | 1.06400  |
| C | -0.37000 | -2.85700 | 3.05700  |
| H | 0.58300  | -2.73600 | 1.11900  |
| H | -1.25900 | -2.44200 | 3.56200  |
| H | 0.50700  | -2.50200 | 3.62600  |
| C | -0.42200 | -4.39000 | 3.11000  |
| H | -1.29300 | -4.74400 | 2.53100  |
| C | -0.50200 | -4.94300 | 4.53800  |
| H | 0.47100  | -4.80100 | 2.60800  |
| H | -1.39900 | -4.53400 | 5.03600  |
| H | 0.36500  | -4.57900 | 5.11800  |

|    |          |          |          |
|----|----------|----------|----------|
| C  | -0.54300 | -6.47500 | 4.60000  |
| H  | -1.40700 | -6.84100 | 4.01700  |
| C  | -0.62600 | -7.03000 | 6.02700  |
| H  | 0.35600  | -6.88400 | 4.10400  |
| H  | -1.52600 | -6.62300 | 6.52100  |
| H  | 0.23600  | -6.66300 | 6.60900  |
| C  | -0.66300 | -8.56200 | 6.08000  |
| H  | -0.72400 | -8.92800 | 7.11600  |
| H  | 0.24000  | -8.99700 | 5.62400  |
| H  | -1.53500 | -8.95700 | 5.53500  |
| C  | -0.13200 | 1.40800  | 0.56400  |
| H  | -1.08700 | 1.63700  | 1.05200  |
| H  | 0.65700  | 1.55300  | 1.31300  |
| C  | 0.09600  | 2.31400  | -0.64100 |
| C  | -0.08200 | 3.78700  | -0.23500 |
| H  | -0.59900 | 2.07600  | -1.46300 |
| H  | 1.11600  | 2.17700  | -1.03200 |
| H  | -1.11400 | 3.94400  | 0.12400  |
| C  | 0.20900  | 4.75500  | -1.38900 |
| H  | 0.58200  | 4.02200  | 0.61500  |
| H  | -0.44600 | 4.50700  | -2.24300 |
| H  | 1.24500  | 4.60100  | -1.73800 |
| C  | 0.01700  | 6.22900  | -1.00900 |
| H  | -1.02100 | 6.38300  | -0.66300 |
| C  | 0.31700  | 7.20000  | -2.15700 |
| H  | 0.66700  | 6.47000  | -0.14900 |
| H  | -0.33300 | 6.96000  | -3.01700 |
| H  | 1.35500  | 7.04500  | -2.50300 |
| C  | 0.12800  | 8.67600  | -1.78100 |
| H  | 0.77700  | 8.91500  | -0.92000 |
| C  | 0.43400  | 9.63800  | -2.93500 |
| H  | -0.90900 | 8.83100  | -1.43600 |
| H  | 1.47400  | 9.52800  | -3.27800 |
| H  | 0.29000  | 10.68700 | -2.63400 |
| H  | -0.22300 | 9.44400  | -3.79700 |
| Cl | -1.81500 | 1.27500  | -3.79400 |

**[TOA]Br**

|   |          |          |          |
|---|----------|----------|----------|
| N | 0.00800  | 0.15300  | 0.10400  |
| C | 1.29400  | 0.24200  | -0.71900 |
| C | 0.30700  | -0.22800 | 1.55600  |
| C | -0.86600 | -0.90500 | -0.57800 |
| C | 2.34300  | 1.22900  | -0.22100 |
| H | 0.97500  | 0.49300  | -1.73800 |
| H | 1.70200  | -0.77600 | -0.74700 |
| H | 1.92200  | 2.24300  | -0.14400 |
| C | 3.54400  | 1.25700  | -1.18200 |
| H | 2.69700  | 0.94700  | 0.78300  |
| H | 3.20200  | 1.56500  | -2.18500 |
| H | 3.95000  | 0.23700  | -1.28900 |
| C | 4.65800  | 2.20100  | -0.71000 |
| H | 4.24600  | 3.21800  | -0.59000 |
| C | 5.85800  | 2.24800  | -1.66400 |
| H | 5.00000  | 1.88500  | 0.29100  |
| H | 5.51600  | 2.57400  | -2.66200 |
| H | 6.25900  | 1.22700  | -1.79400 |
| C | 6.98300  | 3.17400  | -1.18600 |
| H | 6.58200  | 4.19500  | -1.05200 |
| C | 8.18500  | 3.22700  | -2.13900 |
| H | 7.32600  | 2.84500  | -0.18900 |
| H | 7.84200  | 3.55900  | -3.13400 |
| H | 8.58200  | 2.20600  | -2.27600 |
| C | 9.30500  | 4.15100  | -1.65000 |
| H | 9.69000  | 3.82300  | -0.67100 |
| H | 8.94500  | 5.18600  | -1.53600 |
| H | 10.15200 | 4.16700  | -2.35300 |
| H | -1.02200 | -0.56100 | -1.61200 |
| C | -2.20400 | -1.20600 | 0.08600  |
| H | -0.24700 | -1.81000 | -0.62300 |
| H | -2.84700 | -0.31300 | 0.09200  |
| H | -2.06800 | -1.51600 | 1.13400  |
| C | -2.92400 | -2.33100 | -0.67900 |
| H | -3.03700 | -2.02900 | -1.73500 |
| C | -4.29700 | -2.66900 | -0.08500 |
| H | -2.29200 | -3.23500 | -0.67500 |
| H | -4.92900 | -1.76300 | -0.09200 |
| H | -4.17700 | -2.95400 | 0.97500  |
| C | -5.01900 | -3.79600 | -0.83400 |
| H | -5.14000 | -3.50900 | -1.89400 |
| C | -6.39200 | -4.14300 | -0.24400 |
| H | -4.38400 | -4.70000 | -0.83000 |
| H | -7.02800 | -3.24000 | -0.24600 |
| H | -6.27100 | -4.43100 | 0.81600  |

|   |          |          |          |
|---|----------|----------|----------|
| C | -7.11700 | -5.27000 | -0.99200 |
| H | -7.23900 | -4.98100 | -2.05000 |
| C | -8.48600 | -5.61100 | -0.39300 |
| H | -6.48000 | -6.17100 | -0.99100 |
| H | -8.39100 | -5.93600 | 0.65500  |
| H | -8.98000 | -6.42100 | -0.95000 |
| H | -9.15500 | -4.73600 | -0.41000 |
| H | -0.65700 | -0.18900 | 2.07900  |
| H | 0.92500  | 0.58400  | 1.95600  |
| C | 0.98300  | -1.57700 | 1.77200  |
| H | 0.35300  | -2.39500 | 1.39100  |
| C | 1.24100  | -1.80300 | 3.27200  |
| H | 1.94100  | -1.62500 | 1.23300  |
| H | 0.28500  | -1.74200 | 3.82000  |
| H | 1.87600  | -0.98900 | 3.66000  |
| C | 1.90800  | -3.15300 | 3.56300  |
| H | 1.27000  | -3.96500 | 3.17200  |
| C | 2.17100  | -3.38800 | 5.05600  |
| H | 2.86100  | -3.21400 | 3.01000  |
| H | 1.21700  | -3.32000 | 5.60800  |
| H | 2.81200  | -2.57700 | 5.44400  |
| C | 2.83100  | -4.74000 | 5.35500  |
| H | 2.19100  | -5.55200 | 4.96700  |
| C | 3.09600  | -4.97800 | 6.84800  |
| H | 3.78500  | -4.81000 | 4.80200  |
| H | 2.14300  | -4.90500 | 7.40000  |
| H | 3.73800  | -4.16800 | 7.23500  |
| C | 3.75200  | -6.33200 | 7.13800  |
| H | 4.72300  | -6.42000 | 6.62600  |
| H | 3.11700  | -7.16300 | 6.79200  |
| H | 3.92800  | -6.47300 | 8.21500  |
| C | -0.70700 | 1.50700  | 0.15600  |
| H | -1.64000 | 1.32600  | 0.70400  |
| H | -0.08100 | 2.15200  | 0.78500  |
| C | -0.98700 | 2.17300  | -1.18700 |
| C | -1.84900 | 3.43000  | -0.98000 |
| H | -1.50400 | 1.48700  | -1.87800 |
| H | -0.04300 | 2.46600  | -1.67300 |
| H | -2.80500 | 3.14300  | -0.50800 |
| C | -2.13300 | 4.17500  | -2.29100 |
| H | -1.34500 | 4.11200  | -0.27300 |
| H | -2.62400 | 3.48200  | -2.99400 |
| H | -1.17600 | 4.46600  | -2.75900 |
| C | -2.99600 | 5.42900  | -2.09100 |
| H | -3.96400 | 5.13800  | -1.64400 |
| C | -3.25500 | 6.23700  | -3.37400 |
| H | -2.50100 | 6.08300  | -1.35300 |

|    |          |          |          |
|----|----------|----------|----------|
| H  | -2.28800 | 6.50200  | -3.83800 |
| H  | -3.73400 | 7.19300  | -3.09900 |
| C  | -4.13800 | 5.53000  | -4.41300 |
| H  | -5.09300 | 5.24500  | -3.93600 |
| C  | -4.42000 | 6.39700  | -5.64500 |
| H  | -3.66200 | 4.58900  | -4.73300 |
| H  | -3.48600 | 6.66900  | -6.16100 |
| H  | -4.92900 | 7.33300  | -5.36400 |
| H  | -5.06100 | 5.87200  | -6.37000 |
| Br | -2.14900 | -0.25200 | -4.24400 |

### [BTEA]Cl

|   |          |          |          |
|---|----------|----------|----------|
| N | 0.48600  | 0.75600  | -0.13600 |
| C | -0.44600 | 1.62400  | 0.71000  |
| C | -0.14700 | 0.66100  | -1.52700 |
| C | -0.60700 | -1.47400 | 0.60600  |
| C | -0.93200 | -2.40500 | -0.39800 |
| C | -2.07000 | -3.21000 | -0.28400 |
| C | -2.89600 | -3.10200 | 0.84100  |
| C | -2.57100 | -2.19700 | 1.85700  |
| C | -1.43200 | -1.39400 | 1.74300  |
| H | -3.19900 | -2.12100 | 2.74600  |
| H | -1.17800 | -0.70900 | 2.55400  |
| H | -2.30700 | -3.92700 | -1.07200 |
| H | -3.78400 | -3.73100 | 0.93100  |
| H | -0.27400 | -2.51600 | -1.26100 |
| C | 0.72400  | 0.02700  | -2.60000 |
| H | -0.42100 | 1.68600  | -1.80300 |
| H | -1.07800 | 0.09900  | -1.38100 |
| H | -1.39600 | 1.07700  | 0.75200  |
| H | -0.61900 | 2.53600  | 0.12700  |
| C | 0.05500  | 1.97100  | 2.10300  |
| C | 1.88900  | 1.35500  | -0.20700 |
| H | 2.28000  | 1.32700  | 0.81700  |
| C | 1.95800  | 2.76100  | -0.78000 |
| H | 2.48300  | 0.65100  | -0.80300 |
| C | 0.65200  | -0.65200 | 0.49000  |
| H | 1.09600  | -0.47200 | 1.47700  |
| H | 1.39900  | -1.17400 | -0.12900 |
| H | 1.41500  | 3.49500  | -0.17100 |
| H | 1.59000  | 2.81700  | -1.81300 |
| H | 3.01500  | 3.06100  | -0.79000 |
| H | 1.53200  | 0.69600  | -2.92500 |
| H | 0.08400  | -0.16500 | -3.47300 |
| H | 1.17600  | -0.92700 | -2.29000 |



|    |          |          |          |
|----|----------|----------|----------|
| H  | 0.27900  | 1.09000  | 2.71900  |
| H  | -0.74800 | 2.52600  | 2.60800  |
| H  | 0.94100  | 2.61800  | 2.08400  |
| Cl | 3.05200  | -2.66000 | -1.32300 |

**[BTMA]Cl**

|    |          |          |          |
|----|----------|----------|----------|
| N  | 0.99000  | -0.19000 | 0.98100  |
| C  | 1.82700  | -0.70700 | -0.15900 |
| C  | -0.46700 | -0.68200 | 0.87600  |
| C  | 1.56100  | -0.71400 | 2.27500  |
| C  | -1.21000 | -0.25200 | -0.36100 |
| C  | -1.97300 | 0.92900  | -0.35900 |
| C  | -2.69100 | 1.31300  | -1.49600 |
| C  | -2.66300 | 0.51400  | -2.64500 |
| C  | -1.92300 | -0.67400 | -2.65100 |
| C  | -1.20500 | -1.05700 | -1.51400 |
| H  | -1.91100 | -1.30800 | -3.53800 |
| H  | -0.64700 | -1.99600 | -1.51800 |
| H  | -3.28100 | 2.23100  | -1.48000 |
| H  | -3.22700 | 0.81100  | -3.53100 |
| H  | -2.01600 | 1.54600  | 0.54100  |
| H  | -0.40200 | -1.77600 | 0.93800  |
| H  | -0.95800 | -0.30800 | 1.78200  |
| H  | 2.59800  | -0.36100 | 2.34700  |
| H  | 1.52100  | -1.80800 | 2.25600  |
| H  | 0.95900  | -0.32500 | 3.10400  |
| H  | 2.85600  | -0.35900 | 0.00700  |
| H  | 1.43200  | -0.30900 | -1.09900 |
| H  | 1.78200  | -1.80100 | -0.15800 |
| C  | 1.05900  | 1.31400  | 0.99700  |
| H  | 0.66900  | 1.69800  | 0.05000  |
| H  | 2.11400  | 1.59100  | 1.12200  |
| H  | 0.45900  | 1.68300  | 1.83600  |
| Cl | 4.74600  | 0.99500  | 1.39700  |

[TBA]Cl

|   |          |          |          |
|---|----------|----------|----------|
| N | -0.08400 | 0.00400  | 0.00100  |
| C | -1.47200 | 0.45200  | 0.46000  |
| C | -2.07400 | -0.32600 | 1.62600  |
| C | -3.46500 | 0.23300  | 1.97300  |
| C | -4.11900 | -0.51200 | 3.14100  |
| C | 0.91900  | 0.01500  | 1.16300  |
| C | 1.01500  | 1.31600  | 1.95500  |
| C | 2.06900  | 1.16900  | 3.06600  |
| C | 2.23000  | 2.44800  | 3.89300  |
| C | -0.18400 | -1.42600 | -0.54100 |
| C | 1.03600  | -1.94500 | -1.29500 |
| C | 0.91500  | -3.46200 | -1.52000 |
| C | 2.08400  | -4.02600 | -2.33500 |
| C | 0.42200  | 0.96600  | -1.07700 |
| C | -0.40400 | 1.03400  | -2.35900 |
| C | 0.27500  | 1.96900  | -3.37400 |
| C | -0.52500 | 2.10200  | -4.67400 |
| H | -2.11900 | 0.37100  | -0.42100 |
| H | -1.37800 | 1.51700  | 0.71000  |
| H | -1.43100 | -0.25900 | 2.51600  |
| H | -2.17200 | -1.39200 | 1.37400  |
| H | -4.11400 | 0.17000  | 1.08300  |
| H | -3.37600 | 1.30400  | 2.21900  |
| H | -3.50600 | -0.43700 | 4.05200  |
| H | -4.24600 | -1.58100 | 2.90900  |
| H | -5.11200 | -0.09700 | 3.36800  |
| H | 1.90000  | -0.21200 | 0.71600  |
| H | 0.62500  | -0.81400 | 1.81900  |
| H | 0.04900  | 1.58200  | 2.41100  |
| H | 1.30600  | 2.15200  | 1.30100  |
| H | 3.03300  | 0.89500  | 2.60700  |
| H | 1.78600  | 0.33400  | 3.72800  |
| H | 2.54700  | 3.29200  | 3.26100  |
| H | 2.98500  | 2.31700  | 4.68200  |
| H | 1.28300  | 2.73100  | 4.37900  |
| H | -1.07600 | -1.44900 | -1.18000 |
| H | -0.38500 | -2.05600 | 0.33500  |
| H | 1.97000  | -1.72500 | -0.75400 |
| H | 1.12100  | -1.44600 | -2.27300 |
| H | -0.03500 | -3.68500 | -2.03500 |
| H | 0.86600  | -3.97000 | -0.54300 |
| H | 2.12900  | -3.56500 | -3.33400 |
| H | 1.98500  | -5.11300 | -2.47000 |
| H | 3.04500  | -3.83400 | -1.83400 |
| H | 1.45800  | 0.65800  | -1.28100 |

|    |          |          |          |
|----|----------|----------|----------|
| H  | 0.45400  | 1.95300  | -0.60200 |
| H  | -1.41700 | 1.41200  | -2.15200 |
| H  | -0.51700 | 0.03600  | -2.81100 |
| H  | 1.28700  | 1.59100  | -3.59800 |
| H  | 0.40800  | 2.96400  | -2.91900 |
| H  | -0.01800 | 2.77300  | -5.38300 |
| H  | -1.52900 | 2.51200  | -4.48300 |
| H  | -0.64900 | 1.12500  | -5.16600 |
| Cl | 4.20600  | -0.06400 | -0.33700 |

**[TBA]Br**

|   |          |          |          |
|---|----------|----------|----------|
| N | -0.08400 | -0.00900 | -0.01100 |
| C | -1.56300 | 0.05200  | 0.38100  |
| C | -2.02000 | 1.32200  | 1.08800  |
| C | -3.52500 | 1.24200  | 1.40000  |
| C | -4.03900 | 2.49600  | 2.11600  |
| C | 0.82100  | 0.16000  | 1.21500  |
| C | 0.64000  | -0.86000 | 2.33300  |
| C | 1.56100  | -0.50800 | 3.51500  |
| C | 1.46400  | -1.52700 | 4.65400  |
| C | 0.12900  | -1.37700 | -0.66800 |
| C | 1.50800  | -1.62900 | -1.26500 |
| C | 1.62600  | -3.09500 | -1.71900 |
| C | 2.97500  | -3.39500 | -2.37900 |
| C | 0.28100  | 1.12400  | -0.97100 |
| C | -0.50800 | 1.18000  | -2.27500 |
| C | 0.00400  | 2.33400  | -3.15500 |
| C | -0.76900 | 2.45200  | -4.47200 |
| H | -1.74100 | -0.82900 | 1.00900  |
| H | -2.12400 | -0.09600 | -0.55000 |
| H | -1.83200 | 2.20800  | 0.46300  |
| H | -1.46900 | 1.46500  | 2.03000  |
| H | -3.72000 | 0.35400  | 2.02300  |
| H | -4.08300 | 1.09600  | 0.46100  |
| H | -3.88400 | 3.39500  | 1.50100  |
| H | -3.51800 | 2.64800  | 3.07400  |
| H | -5.11500 | 2.41500  | 2.32700  |
| H | 0.62500  | 1.17500  | 1.58400  |
| H | 1.85600  | 0.14100  | 0.84400  |
| H | 0.88900  | -1.87300 | 1.98100  |
| H | -0.40200 | -0.88600 | 2.68700  |
| H | 1.30000  | 0.49500  | 3.89100  |
| H | 2.60000  | -0.44700 | 3.15100  |
| H | 0.43700  | -1.59100 | 5.04600  |
| H | 2.12500  | -1.25100 | 5.48800  |

|    |          |          |          |
|----|----------|----------|----------|
| H  | 1.75600  | -2.53300 | 4.31400  |
| H  | -0.64900 | -1.46300 | -1.43700 |
| H  | -0.10200 | -2.11500 | 0.11000  |
| H  | 2.31000  | -1.40600 | -0.54200 |
| H  | 1.67500  | -0.97500 | -2.13500 |
| H  | 0.81000  | -3.32800 | -2.42200 |
| H  | 1.48500  | -3.75600 | -0.84700 |
| H  | 3.12400  | -2.77500 | -3.27600 |
| H  | 3.03900  | -4.45000 | -2.68500 |
| H  | 3.80800  | -3.19200 | -1.68900 |
| H  | 1.35400  | 1.00900  | -1.16900 |
| H  | 0.15300  | 2.05200  | -0.40100 |
| H  | -1.58000 | 1.33200  | -2.07700 |
| H  | -0.41200 | 0.23500  | -2.83300 |
| H  | 1.07600  | 2.18300  | -3.36500 |
| H  | -0.07400 | 3.28000  | -2.59400 |
| H  | -0.38300 | 3.28200  | -5.08200 |
| H  | -1.83800 | 2.63800  | -4.29000 |
| H  | -0.68400 | 1.52900  | -5.06600 |
| Br | 4.68600  | 0.07000  | 0.69000  |

#### [TMA]Cl

|    |          |          |          |
|----|----------|----------|----------|
| N  | 0.22600  | 0.00700  | 0.00000  |
| C  | -0.25600 | -0.98100 | -1.03200 |
| C  | -0.27300 | -0.41600 | 1.35900  |
| C  | 1.72900  | 0.05000  | 0.00100  |
| C  | -0.32400 | 1.37200  | -0.32700 |
| H  | 0.11000  | -0.66200 | -2.01400 |
| H  | -1.35300 | -0.98500 | -1.00400 |
| H  | 0.14500  | -1.96900 | -0.78000 |
| H  | 0.07900  | 0.31100  | 2.09900  |
| H  | -1.37000 | -0.43500 | 1.32000  |
| H  | 0.12800  | -1.41000 | 1.58200  |
| H  | 2.10800  | -0.94900 | 0.24000  |
| H  | 2.05800  | 0.77200  | 0.75600  |
| H  | 2.07100  | 0.35800  | -0.99300 |
| H  | 0.02900  | 2.07900  | 0.43200  |
| H  | 0.04000  | 1.66400  | -1.31700 |
| H  | -1.42000 | 1.30100  | -0.31700 |
| Cl | -3.72600 | -0.10600 | -0.00500 |

**[TEA]Cl**

|    |          |          |          |
|----|----------|----------|----------|
| N  | 0.05400  | -0.01800 | 0.13400  |
| C  | -1.11100 | 0.80900  | -0.42200 |
| C  | -1.07700 | 2.29400  | -0.09800 |
| C  | -0.21500 | -1.46600 | -0.27400 |
| C  | 0.82600  | -2.47800 | 0.17500  |
| C  | 1.39100  | 0.47000  | -0.42900 |
| C  | 1.57300  | 0.29400  | -1.92800 |
| C  | 0.15000  | 0.11900  | 1.65500  |
| C  | -1.09500 | -0.27700 | 2.43100  |
| H  | -2.01800 | 0.34400  | -0.01600 |
| H  | -1.11800 | 0.65300  | -1.51100 |
| H  | -1.96900 | 2.74200  | -0.55800 |
| H  | -0.20400 | 2.80400  | -0.52500 |
| H  | -1.12300 | 2.50600  | 0.97800  |
| H  | -0.30800 | -1.45100 | -1.36600 |
| H  | -1.20300 | -1.71400 | 0.13300  |
| H  | 0.51500  | -3.45900 | -0.21000 |
| H  | 0.89500  | -2.56300 | 1.26700  |
| H  | 1.82600  | -2.26900 | -0.22900 |
| H  | 2.16500  | -0.07000 | 0.12800  |
| H  | 1.46200  | 1.52600  | -0.14200 |
| H  | 2.50200  | 0.81300  | -2.20600 |
| H  | 0.75300  | 0.72700  | -2.52000 |
| H  | 1.68900  | -0.76000 | -2.21300 |
| H  | 0.41500  | 1.16600  | 1.84300  |
| H  | 1.01000  | -0.49100 | 1.95600  |
| H  | -1.96100 | 0.35500  | 2.19800  |
| H  | -0.86900 | -0.14300 | 3.49800  |
| H  | -1.37100 | -1.32900 | 2.28600  |
| Cl | -1.58400 | 0.86500  | -4.03700 |

**Guanidinium chloride**

|    |          |          |          |
|----|----------|----------|----------|
| C  | 0.34700  | -0.01000 | -0.02300 |
| N  | -0.34400 | -1.10500 | 0.31600  |
| N  | 1.68500  | -0.04600 | -0.11200 |
| N  | -0.32200 | 1.12300  | -0.27300 |
| H  | 2.19800  | -0.90000 | 0.07600  |
| H  | 2.21500  | 0.77900  | -0.36700 |
| H  | 0.12400  | -1.98200 | 0.51500  |
| H  | -1.37100 | -1.04100 | 0.37600  |
| H  | 0.16300  | 1.97500  | -0.53400 |
| Cl | -3.34500 | 0.09100  | 0.22200  |
| H  | -1.35000 | 1.11600  | -0.19500 |

[TOMA]Cl

|   |          |          |          |
|---|----------|----------|----------|
| N | -0.65800 | -0.70000 | 1.47000  |
| C | 0.30100  | -1.85400 | 1.15000  |
| C | -1.05500 | -0.77900 | 2.92200  |
| C | -1.89800 | -0.93000 | 0.59800  |
| C | 1.65900  | -1.81000 | 1.84200  |
| H | 0.42600  | -1.85000 | 0.06000  |
| H | -0.26000 | -2.76000 | 1.43000  |
| H | 2.23000  | -0.92200 | 1.53000  |
| C | 2.46800  | -3.07100 | 1.48900  |
| H | 1.54300  | -1.75700 | 2.93500  |
| H | 2.57000  | -3.14600 | 0.39300  |
| H | 1.90800  | -3.96500 | 1.81200  |
| C | 3.86200  | -3.08100 | 2.13000  |
| H | 4.41900  | -2.18600 | 1.80300  |
| C | 4.67500  | -4.33700 | 1.78900  |
| H | 3.75800  | -2.99900 | 3.22600  |
| H | 4.77100  | -4.42200 | 0.69300  |
| H | 4.11800  | -5.23200 | 2.12000  |
| C | 6.07300  | -4.35100 | 2.42100  |
| H | 6.63100  | -3.45600 | 2.08900  |
| C | 6.88800  | -5.60600 | 2.08300  |
| H | 5.97800  | -4.26400 | 3.51800  |
| H | 6.98000  | -5.69400 | 0.98700  |
| H | 6.33100  | -6.49900 | 2.41600  |
| C | 8.28500  | -5.60900 | 2.71500  |
| H | 8.87600  | -4.74500 | 2.37300  |
| H | 8.84400  | -6.52100 | 2.45500  |
| H | 8.22300  | -5.55600 | 3.81300  |
| H | -1.52900 | -1.03200 | -0.43100 |
| C | -2.97900 | 0.14200  | 0.67200  |
| H | -2.28300 | -1.91000 | 0.92400  |
| H | -2.59700 | 1.10900  | 0.31100  |
| H | -3.31700 | 0.29000  | 1.70900  |
| C | -4.18500 | -0.26900 | -0.19000 |
| H | -3.85000 | -0.44500 | -1.22700 |
| C | -5.30200 | 0.78200  | -0.18900 |
| H | -4.58400 | -1.23000 | 0.17700  |
| H | -4.89800 | 1.74200  | -0.55500 |
| H | -5.63200 | 0.96100  | 0.85000  |
| C | -6.51100 | 0.38200  | -1.04400 |
| H | -6.17800 | 0.19800  | -2.08100 |
| C | -7.62900 | 1.43400  | -1.05300 |
| H | -6.91700 | -0.57600 | -0.67500 |
| H | -7.22400 | 2.39300  | -1.42200 |
| H | -7.96200 | 1.62000  | -0.01600 |

|    |           |          |          |
|----|-----------|----------|----------|
| C  | -8.84000  | 1.03700  | -1.90600 |
| H  | -8.50700  | 0.85000  | -2.94200 |
| C  | -9.95000  | 2.09500  | -1.91000 |
| H  | -9.24600  | 0.08000  | -1.53600 |
| H  | -10.80400 | 1.78200  | -2.53000 |
| H  | -9.58200  | 3.05400  | -2.30800 |
| H  | -10.32500 | 2.28000  | -0.89200 |
| C  | -0.02200  | 0.66200  | 1.22000  |
| H  | -0.77100  | 1.40300  | 1.52800  |
| H  | 0.81600   | 0.73600  | 1.92400  |
| C  | 0.44300   | 0.92100  | -0.20800 |
| C  | 1.05200   | 2.32900  | -0.32300 |
| H  | -0.40000  | 0.83600  | -0.91200 |
| H  | 1.19500   | 0.17700  | -0.51200 |
| H  | 0.30000   | 3.07700  | -0.01900 |
| C  | 1.54700   | 2.65100  | -1.73800 |
| H  | 1.89100   | 2.42200  | 0.38800  |
| H  | 0.70800   | 2.54800  | -2.44900 |
| H  | 2.30200   | 1.90300  | -2.03900 |
| C  | 2.14800   | 4.05800  | -1.86300 |
| H  | 1.39000   | 4.80400  | -1.56500 |
| C  | 2.65200   | 4.38600  | -3.27400 |
| H  | 2.98100   | 4.16200  | -1.14600 |
| H  | 1.82000   | 4.27700  | -3.99300 |
| H  | 3.41300   | 3.64300  | -3.57100 |
| C  | 3.24600   | 5.79500  | -3.40300 |
| H  | 4.07400   | 5.90500  | -2.68100 |
| C  | 3.75200   | 6.11200  | -4.81400 |
| H  | 2.48300   | 6.53700  | -3.11000 |
| H  | 2.93900   | 6.04000  | -5.55300 |
| H  | 4.54200   | 5.40800  | -5.11900 |
| H  | 4.16900   | 7.12900  | -4.87400 |
| H  | -0.16300  | -0.64900 | 3.54200  |
| H  | -1.51100  | -1.76300 | 3.09300  |
| H  | -1.76500  | 0.02400  | 3.14000  |
| Cl | -2.34500  | -4.20000 | 2.33600  |

**[TOMA]Br**

|   |          |          |          |
|---|----------|----------|----------|
| N | 0.79000  | -0.70700 | -1.41400 |
| C | -0.09800 | -1.91500 | -1.09000 |
| C | 1.25600  | -0.80400 | -2.84400 |
| C | 2.00500  | -0.81100 | -0.48100 |
| C | -1.42700 | -1.98900 | -1.83300 |
| H | -0.26400 | -1.88600 | -0.00600 |
| H | 0.53200  | -2.79000 | -1.31500 |
| H | -2.07000 | -1.13600 | -1.56700 |
| C | -2.15800 | -3.29500 | -1.47300 |
| H | -1.27400 | -1.95600 | -2.92200 |
| H | -2.28400 | -3.35500 | -0.37800 |
| H | -1.53200 | -4.15500 | -1.76300 |
| C | -3.53000 | -3.41100 | -2.14700 |
| H | -4.15700 | -2.55300 | -1.84700 |
| C | -4.26300 | -4.71600 | -1.81000 |
| H | -3.40600 | -3.33500 | -3.24200 |
| H | -4.37300 | -4.79800 | -0.71400 |
| H | -3.64000 | -5.57300 | -2.12200 |
| C | -5.64500 | -4.82900 | -2.46500 |
| H | -6.26900 | -3.97500 | -2.14800 |
| C | -6.37600 | -6.13800 | -2.13700 |
| H | -5.53700 | -4.74000 | -3.56100 |
| H | -6.47800 | -6.23000 | -1.04200 |
| H | -5.75400 | -6.99000 | -2.45900 |
| C | -7.75900 | -6.23800 | -2.78900 |
| H | -8.41500 | -5.41800 | -2.45700 |
| H | -8.25700 | -7.18700 | -2.53700 |
| H | -7.68500 | -6.18100 | -3.88700 |
| H | 1.59800  | -0.90100 | 0.53500  |
| C | 3.00800  | 0.33400  | -0.55600 |
| H | 2.47600  | -1.77000 | -0.74600 |
| H | 2.53800  | 1.28500  | -0.26100 |
| H | 3.38500  | 0.46000  | -1.58200 |
| C | 4.19600  | 0.05400  | 0.38100  |
| H | 3.82400  | -0.09200 | 1.41000  |
| C | 5.23500  | 1.18200  | 0.37200  |
| H | 4.67900  | -0.89300 | 0.08600  |
| H | 4.74600  | 2.12900  | 0.66300  |
| H | 5.60400  | 1.32900  | -0.65800 |
| C | 6.42400  | 0.91800  | 1.30400  |
| H | 6.05300  | 0.76800  | 2.33300  |
| C | 7.46500  | 2.04600  | 1.30200  |
| H | 6.91300  | -0.02800 | 1.01100  |
| H | 6.97600  | 2.99300  | 1.59400  |
| H | 7.83600  | 2.19700  | 0.27200  |



|    |          |          |          |
|----|----------|----------|----------|
| C  | 8.65600  | 1.78600  | 2.23400  |
| H  | 8.28400  | 1.63400  | 3.26200  |
| C  | 9.68800  | 2.91800  | 2.22600  |
| H  | 9.14400  | 0.84000  | 1.94100  |
| H  | 10.10200 | 3.07100  | 1.21600  |
| H  | 10.52900 | 2.70200  | 2.90200  |
| H  | 9.23600  | 3.87000  | 2.54700  |
| C  | 0.04600  | 0.61300  | -1.24200 |
| H  | 0.75500  | 1.39700  | -1.53900 |
| H  | -0.75800 | 0.60200  | -1.99000 |
| C  | -0.51100 | 0.88100  | 0.15000  |
| C  | -1.21600 | 2.24700  | 0.18800  |
| H  | 0.29600  | 0.87200  | 0.90000  |
| H  | -1.22800 | 0.09600  | 0.43700  |
| H  | -0.49500 | 3.03700  | -0.08200 |
| C  | -1.83000 | 2.56300  | 1.55700  |
| H  | -2.00800 | 2.27100  | -0.58100 |
| H  | -1.04100 | 2.52100  | 2.32900  |
| H  | -2.56100 | 1.77700  | 1.81700  |
| C  | -2.51900 | 3.93400  | 1.60900  |
| H  | -1.78300 | 4.71900  | 1.36100  |
| C  | -3.15600 | 4.24800  | 2.96800  |
| H  | -3.29500 | 3.98100  | 0.82400  |
| H  | -2.38300 | 4.19200  | 3.75500  |
| H  | -3.89900 | 3.46800  | 3.21100  |
| C  | -3.83400 | 5.62400  | 3.02500  |
| H  | -4.60100 | 5.68300  | 2.23300  |
| C  | -4.47800 | 5.92600  | 4.38300  |
| H  | -3.09000 | 6.40400  | 2.78900  |
| H  | -5.25200 | 5.18200  | 4.62800  |
| H  | -4.95200 | 6.91900  | 4.39400  |
| H  | -3.72900 | 5.90400  | 5.19100  |
| H  | 0.38500  | -0.76800 | -3.50500 |
| H  | 1.79500  | -1.75300 | -2.96300 |
| H  | 1.91100  | 0.04300  | -3.06400 |
| Br | 2.90100  | -4.30300 | -2.12100 |

**[TEA]Br**

|    |          |          |          |
|----|----------|----------|----------|
| N  | -0.14600 | 0.05800  | -0.00300 |
| C  | -1.67100 | 0.14100  | -0.11600 |
| C  | 0.47000  | -0.55100 | -1.26600 |
| C  | 0.34200  | 1.49200  | 0.21500  |
| H  | -0.03600 | 2.06700  | -0.63900 |
| C  | 1.84500  | 1.65900  | 0.36400  |
| H  | -0.18400 | 1.85200  | 1.10600  |
| C  | 0.22100  | 0.21500  | -2.55400 |
| H  | 0.06100  | -1.56600 | -1.33000 |
| H  | 1.54400  | -0.65200 | -1.05400 |
| H  | -1.87000 | 0.83600  | -0.94000 |
| C  | -2.39100 | -1.17900 | -0.33300 |
| H  | -2.01100 | 0.62600  | 0.80600  |
| C  | 0.27500  | -0.85200 | 1.15400  |
| H  | -0.11100 | -1.84600 | 0.90100  |
| C  | -0.20000 | -0.42200 | 2.53300  |
| H  | 1.37000  | -0.91100 | 1.10300  |
| H  | -2.10700 | -1.67300 | -1.27200 |
| H  | -3.46500 | -0.95400 | -0.39600 |
| H  | -2.25300 | -1.88300 | 0.49700  |
| H  | 0.70300  | -0.34800 | -3.36500 |
| H  | 0.66500  | 1.21900  | -2.54600 |
| H  | -0.84400 | 0.29900  | -2.80400 |
| H  | 2.40100  | 1.33100  | -0.52400 |
| H  | 2.24700  | 1.13300  | 1.23900  |
| H  | 2.03900  | 2.73200  | 0.50200  |
| H  | 0.16000  | -1.17400 | 3.24900  |
| H  | -1.29400 | -0.38700 | 2.61900  |
| H  | 0.21200  | 0.54700  | 2.84300  |
| Br | 4.02600  | -1.80900 | 0.01200  |

[TPA]Cl

|    |          |          |          |
|----|----------|----------|----------|
| N  | 0.11000  | -0.00400 | 0.00200  |
| C  | -0.92200 | 1.02500  | -0.47500 |
| C  | -0.80300 | 1.47700  | -1.92700 |
| C  | -1.86200 | 2.55300  | -2.21300 |
| C  | 0.03300  | -1.28800 | -0.82800 |
| C  | -1.26000 | -2.08800 | -0.71000 |
| C  | -1.27000 | -3.21400 | -1.75400 |
| C  | 1.53600  | 0.52500  | -0.16100 |
| C  | 1.85300  | 1.84200  | 0.54000  |
| C  | 3.32600  | 2.21000  | 0.31200  |
| C  | -0.21400 | -0.28000 | 1.47100  |
| C  | 0.68700  | -1.28600 | 2.18100  |
| C  | 0.20200  | -1.48900 | 3.62400  |
| H  | -0.81300 | 1.88200  | 0.20200  |
| H  | -1.91500 | 0.58400  | -0.29300 |
| H  | -0.96000 | 0.63000  | -2.61100 |
| H  | 0.19600  | 1.88500  | -2.13900 |
| H  | -2.87300 | 2.17000  | -2.00800 |
| H  | -1.81600 | 2.86400  | -3.26500 |
| H  | -1.70300 | 3.44400  | -1.58800 |
| H  | 0.89500  | -1.89500 | -0.52500 |
| H  | 0.20700  | -0.97700 | -1.86600 |
| H  | -2.14400 | -1.44500 | -0.84600 |
| H  | -1.34200 | -2.52900 | 0.29400  |
| H  | -2.18500 | -3.81500 | -1.65700 |
| H  | -0.41000 | -3.88900 | -1.62800 |
| H  | -1.23800 | -2.81100 | -2.77700 |
| H  | 1.70100  | 0.61300  | -1.24200 |
| H  | 2.19600  | -0.27300 | 0.20200  |
| H  | 1.66200  | 1.76400  | 1.62000  |
| H  | 1.21500  | 2.65100  | 0.15500  |
| H  | 3.99800  | 1.43900  | 0.71800  |
| H  | 3.56200  | 3.16000  | 0.81000  |
| H  | 3.54800  | 2.32400  | -0.75900 |
| H  | -1.25900 | -0.61600 | 1.48200  |
| H  | -0.18000 | 0.69300  | 1.97600  |
| H  | 1.72800  | -0.93200 | 2.19700  |
| H  | 0.68200  | -2.25200 | 1.65600  |
| H  | 0.84800  | -2.20700 | 4.14500  |
| H  | -0.82700 | -1.87900 | 3.64700  |
| H  | 0.22000  | -0.54500 | 4.18700  |
| Cl | -4.40800 | -0.01700 | -0.14800 |

**[DEA]CI**

|    |          |          |          |
|----|----------|----------|----------|
| N  | -0.00400 | -0.02600 | 0.18800  |
| C  | -1.25400 | -0.43000 | -0.54600 |
| H  | -0.02400 | -0.43300 | 1.13200  |
| C  | 1.27300  | -0.43600 | -0.49400 |
| H  | 1.21500  | -1.51900 | -0.66200 |
| C  | 2.48600  | -0.05900 | 0.34200  |
| H  | 1.27900  | 0.06800  | -1.46800 |
| H  | 2.47200  | -0.56400 | 1.31900  |
| H  | 2.53600  | 1.02700  | 0.50400  |
| H  | 3.39800  | -0.37000 | -0.18600 |
| C  | -2.49800 | -0.04600 | 0.23900  |
| H  | -1.19500 | -1.51300 | -0.71100 |
| H  | -1.21700 | 0.07400  | -1.52000 |
| H  | -2.54900 | 1.04000  | 0.39800  |
| H  | -2.52700 | -0.55000 | 1.21600  |
| H  | -3.38900 | -0.35200 | -0.32500 |
| H  | -0.00300 | 1.04100  | 0.30200  |
| Cl | 0.00100  | 3.04800  | 0.27300  |

**[BHDE]CI**

|   |          |          |          |
|---|----------|----------|----------|
| N | 0.38000  | -1.14800 | 0.58700  |
| C | 1.40200  | -1.72800 | 1.53100  |
| C | 0.79700  | -1.36900 | -0.86800 |
| C | -0.85800 | 1.09000  | 0.19800  |
| C | -2.14300 | 1.22300  | 0.75200  |
| C | -3.13400 | 1.95100  | 0.08600  |
| C | -2.84800 | 2.56500  | -1.13900 |
| C | -1.56600 | 2.45400  | -1.69000 |
| C | -0.57500 | 1.72600  | -1.02400 |
| H | -1.33300 | 2.94400  | -2.63700 |
| H | 0.43100  | 1.64700  | -1.44400 |
| H | -4.12700 | 2.04600  | 0.52900  |
| H | -3.61900 | 3.13700  | -1.65700 |
| H | -2.36800 | 0.76300  | 1.71700  |
| C | 2.22500  | -1.00100 | -1.26400 |
| H | 0.06800  | -0.82500 | -1.48000 |
| H | 0.66000  | -2.44400 | -1.04500 |
| C | -0.92600 | -1.86800 | 0.79300  |
| C | 0.21700  | 0.34900  | 0.95000  |
| H | 1.20600  | 0.79500  | 0.79400  |
| H | 0.00000  | 0.34300  | 2.02500  |
| H | 2.34200  | -1.41800 | -2.27900 |
| H | 2.95800  | -1.51600 | -0.62400 |

|    |          |          |          |
|----|----------|----------|----------|
| O  | 2.49300  | 0.40000  | -1.32000 |
| Cl | 4.07200  | 0.95900  | 1.22000  |
| H  | 3.03400  | 0.63500  | -0.50900 |
| H  | 2.31200  | -1.11600 | 1.50000  |
| H  | 1.61100  | -2.76000 | 1.22800  |
| H  | 0.97700  | -1.71300 | 2.54100  |
| H  | -0.75400 | -2.94000 | 0.65200  |
| H  | -1.65600 | -1.50400 | 0.06400  |
| H  | -1.27600 | -1.67400 | 1.81300  |

### **Betaine**

|   |          |          |          |
|---|----------|----------|----------|
| O | 1.57200  | 0.15200  | -2.09200 |
| C | 1.41000  | 1.18700  | -1.39000 |
| O | 1.92100  | 2.32800  | -1.56100 |
| C | 0.48400  | 1.14900  | -0.13900 |
| N | -0.21100 | -0.16400 | 0.21300  |
| C | 0.80400  | -1.24200 | 0.50000  |
| C | -1.03700 | 0.06600  | 1.45200  |
| C | -1.12200 | -0.60000 | -0.90600 |
| H | 1.07300  | 1.42900  | 0.74300  |
| H | -0.31400 | 1.89100  | -0.27000 |
| H | 1.39600  | -1.39600 | -0.40700 |
| H | 1.43800  | -0.90600 | 1.32700  |
| H | 0.26600  | -2.15300 | 0.78200  |
| H | -1.53900 | -0.87200 | 1.71400  |
| H | -1.77700 | 0.84500  | 1.24200  |
| H | -0.37300 | 0.38000  | 2.26400  |
| H | -1.85800 | 0.19200  | -1.07800 |
| H | -0.50800 | -0.76200 | -1.79600 |
| H | -1.62500 | -1.52300 | -0.59800 |

## Menthol

|   |          |          |          |
|---|----------|----------|----------|
| O | 0.43700  | 2.55800  | -0.42700 |
| C | -0.09800 | 1.32500  | 0.11700  |
| C | 0.68000  | 0.08300  | -0.36600 |
| C | 0.04000  | -1.18600 | 0.23400  |
| C | -1.45500 | -1.29900 | -0.09700 |
| C | -2.23800 | -0.06500 | 0.37800  |
| C | -3.72700 | -0.15300 | 0.02100  |
| C | -1.59500 | 1.20900  | -0.19700 |
| C | 2.21200  | 0.19300  | -0.13200 |
| C | 2.62100  | 0.13600  | 1.34900  |
| C | 2.98500  | -0.85700 | -0.94700 |
| H | 0.32700  | 2.51500  | -1.39600 |
| H | 0.03300  | 1.43500  | 1.20600  |
| H | 0.53200  | 0.03800  | -1.46500 |
| H | 0.16100  | -1.17300 | 1.33100  |
| H | 0.57200  | -2.07900 | -0.12800 |
| H | -1.87500 | -2.20900 | 0.36200  |
| H | -1.58500 | -1.40600 | -1.19000 |
| H | -2.15100 | -0.01700 | 1.48000  |
| H | -3.86300 | -0.20200 | -1.07200 |
| H | -4.27900 | 0.72400  | 0.39000  |
| H | -4.18700 | -1.05200 | 0.45800  |
| H | -1.72000 | 1.20700  | -1.29800 |
| H | -2.11100 | 2.10600  | 0.18300  |
| H | 2.50300  | 1.18500  | -0.51600 |
| H | 2.08800  | 0.88300  | 1.95500  |
| H | 2.42500  | -0.85500 | 1.78600  |
| H | 3.69900  | 0.33400  | 1.45400  |
| H | 2.78100  | -1.87900 | -0.59300 |
| H | 4.07000  | -0.69100 | -0.86400 |
| H | 2.71800  | -0.81000 | -2.01500 |

## Thymol

|   |          |          |          |
|---|----------|----------|----------|
| C | 0.50400  | -0.68400 | -0.91600 |
| C | 1.85300  | -0.32500 | -0.81000 |
| C | 2.26900  | 0.68400  | 0.07400  |
| C | 3.72500  | 1.07300  | 0.16400  |
| C | 1.29000  | 1.32100  | 0.84900  |
| C | -0.05900 | 0.95900  | 0.73300  |
| C | -0.49300 | -0.04300 | -0.14400 |
| C | -1.94900 | -0.47500 | -0.25800 |
| C | -2.95000 | 0.65000  | 0.04400  |
| C | -2.22300 | -1.70400 | 0.63500  |
| O | 0.09800  | -1.67900 | -1.78000 |
| H | 2.59000  | -0.84600 | -1.43000 |
| H | 3.90400  | 1.74300  | 1.01600  |
| H | 4.05400  | 1.59700  | -0.74800 |
| H | 4.37100  | 0.19000  | 0.27900  |
| H | 1.58000  | 2.11000  | 1.54800  |
| H | -0.79600 | 1.48000  | 1.34700  |
| H | -2.10800 | -0.79100 | -1.30200 |
| H | -2.91500 | 0.95600  | 1.10100  |
| H | -3.97300 | 0.30400  | -0.16200 |
| H | -2.76000 | 1.53900  | -0.57500 |
| H | -3.25600 | -2.06200 | 0.49700  |
| H | -2.09200 | -1.44600 | 1.69800  |
| H | -1.54100 | -2.53300 | 0.39800  |
| H | 0.87800  | -2.01800 | -2.25800 |

**[TBP]Br**

|   |          |          |          |
|---|----------|----------|----------|
| P | 0.47200  | -0.11600 | -0.15100 |
| C | -1.14100 | -0.45200 | 0.66200  |
| C | 1.24600  | 1.39900  | 0.54600  |
| C | 1.65400  | -1.48700 | 0.17200  |
| H | 2.56200  | -1.20900 | -0.39300 |
| C | 1.16100  | -2.89200 | -0.20400 |
| H | 1.91000  | -1.43200 | 1.24200  |
| H | 0.88600  | -2.92700 | -1.27100 |
| H | 0.25000  | -3.13900 | 0.36500  |
| C | 2.23200  | -3.95900 | 0.07300  |
| H | 3.14100  | -3.71400 | -0.50200 |
| C | 1.76000  | -5.37300 | -0.28100 |
| H | 2.51600  | -3.91700 | 1.13700  |
| H | 1.49600  | -5.44800 | -1.34700 |
| H | 0.87100  | -5.65300 | 0.30500  |
| H | 2.54400  | -6.11500 | -0.07600 |
| C | 0.37400  | 2.66200  | 0.61200  |
| H | 2.15100  | 1.55600  | -0.06900 |
| H | 1.59000  | 1.11400  | 1.55300  |
| H | 0.06800  | 2.96700  | -0.40000 |
| C | 1.12300  | 3.82500  | 1.28100  |
| H | -0.55200 | 2.45900  | 1.17400  |
| H | 2.05000  | 4.02800  | 0.71900  |
| H | 1.43400  | 3.51700  | 2.29400  |
| C | 0.27700  | 5.09900  | 1.36400  |
| H | -0.64100 | 4.93000  | 1.94800  |
| H | -0.02100 | 5.44500  | 0.36200  |
| H | 0.83500  | 5.91400  | 1.84700  |
| H | -1.57000 | -1.33000 | 0.15300  |
| C | -1.05700 | -0.67700 | 2.18000  |
| H | -1.79800 | 0.40000  | 0.42800  |
| H | -0.39700 | -1.53200 | 2.40000  |
| H | -0.60600 | 0.20200  | 2.66900  |
| C | -2.44100 | -0.93900 | 2.79300  |
| H | -3.10000 | -0.08300 | 2.57300  |
| C | -2.38100 | -1.17100 | 4.30600  |
| H | -2.89300 | -1.81500 | 2.29900  |
| H | -1.75400 | -2.04200 | 4.55000  |
| H | -1.95900 | -0.29700 | 4.82600  |
| H | -3.38500 | -1.35400 | 4.71800  |
| C | 0.24000  | -0.00100 | -1.97100 |
| H | 1.23900  | 0.26600  | -2.36100 |
| C | -0.84700 | 0.95600  | -2.48300 |
| H | 0.02600  | -1.03000 | -2.30200 |
| H | -0.61100 | 1.99100  | -2.19200 |



|    |          |          |          |
|----|----------|----------|----------|
| H  | -1.81900 | 0.71000  | -2.02600 |
| C  | -0.97900 | 0.88300  | -4.01200 |
| H  | -0.00400 | 1.11600  | -4.47000 |
| C  | -2.04800 | 1.83500  | -4.55700 |
| H  | -1.22000 | -0.15400 | -4.30300 |
| H  | -2.12500 | 1.75900  | -5.65200 |
| H  | -1.81100 | 2.88100  | -4.31000 |
| H  | -3.03800 | 1.60600  | -4.13400 |
| Br | 4.08800  | 0.73700  | -2.08500 |

**[MTPP]Cl**

|   |          |          |          |
|---|----------|----------|----------|
| P | -0.26500 | -0.02500 | 0.63500  |
| C | -0.60800 | 1.54500  | -0.22800 |
| C | 1.52500  | -0.15700 | 0.96500  |
| C | -0.79300 | -1.42800 | -0.40600 |
| C | -1.92000 | 2.05400  | -0.24000 |
| C | 0.42700  | 2.22100  | -0.89600 |
| C | -2.18300 | 3.24500  | -0.92100 |
| C | -1.15400 | 3.92200  | -1.58700 |
| C | 0.14700  | 3.41000  | -1.57500 |
| H | -1.36800 | 4.85300  | -2.11500 |
| H | 0.95100  | 3.93700  | -2.09200 |
| H | -2.73700 | 1.53600  | 0.27300  |
| H | -3.19800 | 3.64700  | -0.92900 |
| H | 1.44500  | 1.83000  | -0.88500 |
| C | 2.08700  | 0.59200  | 2.01500  |
| C | 2.33700  | -0.97500 | 0.16300  |
| C | 3.71100  | -1.04400 | 0.41500  |
| C | 3.46000  | 0.51500  | 2.25800  |
| C | 4.27100  | -0.30200 | 1.46000  |
| H | 1.90500  | -1.56000 | -0.64900 |
| H | 1.46700  | 1.23400  | 2.64300  |
| H | 3.89600  | 1.09300  | 3.07300  |
| H | 4.34100  | -1.68100 | -0.20700 |
| H | 5.34300  | -0.35900 | 1.65400  |
| C | -1.07100 | -1.23500 | -1.76900 |
| C | -0.89900 | -2.70800 | 0.16700  |
| C | -1.45700 | -2.32400 | -2.55500 |
| C | -1.28800 | -3.78800 | -0.62800 |
| C | -1.56700 | -3.59700 | -1.98600 |
| H | -1.87200 | -4.44400 | -2.60300 |
| H | -1.67500 | -2.17400 | -3.61300 |
| H | -0.68200 | -2.87100 | 1.22400  |
| H | -1.37400 | -4.78000 | -0.18300 |
| H | -0.99200 | -0.24400 | -2.21700 |

|    |          |          |         |
|----|----------|----------|---------|
| C  | -1.18100 | -0.06700 | 2.20700 |
| H  | -0.95500 | -1.00500 | 2.72900 |
| H  | -2.26200 | -0.00400 | 1.99800 |
| H  | -0.87200 | 0.78300  | 2.82800 |
| Cl | -4.93600 | 0.35500  | 1.57200 |

**[ATPP]Br**

|   |          |          |          |
|---|----------|----------|----------|
| P | -0.18400 | -0.20300 | 0.19600  |
| C | -0.65200 | 1.53700  | -0.09000 |
| C | 1.62200  | -0.32400 | 0.42400  |
| C | -0.68700 | -1.20900 | -1.24300 |
| C | -1.99900 | 1.91400  | 0.06400  |
| C | 0.30600  | 2.47200  | -0.51500 |
| C | -2.37400 | 3.23400  | -0.19800 |
| C | -1.42100 | 4.17000  | -0.61700 |
| C | -0.08400 | 3.78900  | -0.77700 |
| H | -1.72100 | 5.19900  | -0.82000 |
| H | 0.66000  | 4.51600  | -1.10600 |
| H | -2.76000 | 1.19100  | 0.38000  |
| H | -3.41700 | 3.53200  | -0.07500 |
| H | 1.34900  | 2.18200  | -0.64200 |
| C | 2.24700  | 0.42300  | 1.44100  |
| C | 2.38200  | -1.17300 | -0.39800 |
| C | 3.76200  | -1.27400 | -0.20000 |
| C | 3.62600  | 0.31300  | 1.62900  |
| C | 4.38400  | -0.53300 | 0.81100  |
| H | 1.90600  | -1.75000 | -1.19000 |
| H | 1.66900  | 1.09000  | 2.08100  |
| H | 4.11000  | 0.89400  | 2.41600  |
| H | 4.35100  | -1.93100 | -0.84200 |
| H | 5.46100  | -0.61300 | 0.96100  |
| C | -0.87500 | -2.59500 | -1.10200 |
| C | -0.86200 | -0.59200 | -2.49300 |
| C | -1.24000 | -3.35700 | -2.21500 |
| C | -1.22500 | -1.36500 | -3.59900 |
| C | -1.41500 | -2.74400 | -3.46100 |
| H | -1.70100 | -3.34400 | -4.32600 |
| H | -1.38800 | -4.43200 | -2.10500 |
| H | -0.72200 | 0.48300  | -2.60700 |
| H | -1.36200 | -0.88500 | -4.56900 |
| H | -0.74000 | -3.08800 | -0.13900 |
| C | -1.07900 | -0.84900 | 1.68500  |
| H | -0.77800 | -1.90100 | 1.78800  |
| H | -2.15500 | -0.82300 | 1.41000  |

|    |          |          |         |
|----|----------|----------|---------|
| C  | -0.82300 | -0.08000 | 2.94600 |
| C  | -0.22900 | -0.60100 | 4.02700 |
| H  | -1.18300 | 0.95200  | 2.96900 |
| H  | 0.13800  | -1.63000 | 4.04100 |
| H  | -0.09800 | -0.01100 | 4.93500 |
| Br | -4.79800 | -0.58400 | 1.12400 |

**HBD's:**

**1,2,4-triazole**

|   |          |          |         |
|---|----------|----------|---------|
| N | 0.60300  | -1.10100 | 0.00000 |
| C | 0.99600  | 0.17600  | 0.00000 |
| C | -0.76100 | -0.99800 | 0.00000 |
| N | -1.23100 | 0.25000  | 0.00000 |
| N | -0.08200 | 0.98400  | 0.00000 |
| H | -0.11700 | 2.00200  | 0.00000 |
| H | -1.42600 | -1.85800 | 0.00000 |
| H | 2.01700  | 0.54500  | 0.00000 |

**2,6-xylenol**

|   |          |          |          |
|---|----------|----------|----------|
| C | -1.27700 | 0.00800  | 0.06500  |
| C | -0.02500 | 0.65300  | 0.00100  |
| C | -1.29100 | -1.39400 | 0.06600  |
| C | -0.10500 | -2.13400 | 0.00500  |
| C | 1.12200  | -1.46700 | -0.05800 |
| C | 1.18700  | -0.06600 | -0.06100 |
| H | 2.05300  | -2.03700 | -0.10600 |
| C | 2.50500  | 0.66800  | -0.12700 |
| H | -2.25400 | -1.90900 | 0.11500  |
| H | -0.13800 | -3.22500 | 0.00600  |
| C | -2.54700 | 0.81700  | 0.13000  |
| O | -0.04300 | 2.03300  | 0.00200  |
| H | -3.42400 | 0.15800  | 0.17300  |
| H | -2.56300 | 1.47100  | 1.01600  |
| H | -2.65200 | 1.47400  | -0.74700 |
| H | 3.34100  | -0.04200 | -0.17000 |
| H | 2.66500  | 1.31100  | 0.75400  |
| H | 2.57400  | 1.31200  | -1.02000 |
| H | 0.87200  | 2.36900  | -0.04500 |

**Urea**

|   |          |          |          |
|---|----------|----------|----------|
| N | -0.69500 | -0.95800 | -0.06000 |
| C | 0.43500  | -0.18600 | -0.19600 |
| O | 1.49500  | -0.64000 | -0.67200 |
| N | 0.32200  | 1.11800  | 0.22700  |
| H | -0.71300 | -1.81900 | -0.59800 |
| H | -1.59900 | -0.51200 | 0.07800  |
| H | -0.44300 | 1.38600  | 0.84000  |
| H | 1.19700  | 1.61100  | 0.38100  |

**Imidazole**

|   |          |          |          |
|---|----------|----------|----------|
| C | 0.88000  | -0.82100 | -0.25800 |
| N | -0.33800 | -1.30800 | -0.47900 |
| C | -1.20800 | -0.28000 | -0.14700 |
| C | -0.50400 | 0.82800  | 0.27500  |
| N | 0.82500  | 0.46400  | 0.19800  |
| H | 1.81800  | -1.34700 | -0.40800 |
| H | -2.28400 | -0.39700 | -0.23200 |
| H | -0.81200 | 1.81100  | 0.61300  |
| H | 1.62200  | 1.05000  | 0.43800  |

**Phenol**

|   |          |          |          |
|---|----------|----------|----------|
| C | 1.10400  | 0.22400  | -0.14800 |
| C | 0.63600  | -0.75300 | 0.74300  |
| C | -0.74100 | -0.97100 | 0.87000  |
| C | -1.65300 | -0.22300 | 0.11600  |
| C | -1.17500 | 0.75000  | -0.77100 |
| C | 0.19700  | 0.97900  | -0.90800 |
| O | 2.44400  | 0.48600  | -0.31800 |
| H | 1.34600  | -1.33800 | 1.33300  |
| H | -1.09800 | -1.73300 | 1.56500  |
| H | -2.72500 | -0.39700 | 0.21800  |
| H | -1.87500 | 1.34100  | -1.36500 |
| H | 0.57600  | 1.73600  | -1.59700 |
| H | 2.96300  | -0.10300 | 0.26300  |

**Lactic acid**

|   |          |          |          |
|---|----------|----------|----------|
| C | 1.10000  | -0.52100 | 0.55000  |
| C | -0.32600 | -0.01600 | 0.27600  |
| O | -0.32900 | 1.43000  | 0.34900  |
| C | -0.81000 | -0.46800 | -1.10000 |

|   |          |          |          |
|---|----------|----------|----------|
| O | 1.40900  | -1.70200 | 0.58000  |
| O | 2.00700  | 0.45400  | 0.75000  |
| H | -0.97100 | -0.43600 | 1.06200  |
| H | -0.77400 | 1.69800  | 1.17300  |
| H | -0.75400 | -1.56200 | -1.18000 |
| H | -0.19100 | -0.02400 | -1.89200 |
| H | -1.85200 | -0.15700 | -1.24400 |
| H | 1.49100  | 1.30400  | 0.67600  |

### **Ethylene glycol**

|   |          |          |          |
|---|----------|----------|----------|
| O | 0.79000  | 1.50500  | 0.34500  |
| C | -0.42100 | 0.75700  | 0.12800  |
| C | -0.14800 | -0.55700 | -0.58900 |
| O | 0.79300  | -1.36900 | 0.14800  |
| H | 1.42700  | 0.87200  | 0.72800  |
| H | -0.92900 | 0.55900  | 1.09100  |
| H | -1.08200 | 1.38800  | -0.48300 |
| H | -1.09500 | -1.09700 | -0.75700 |
| H | 0.32600  | -0.36700 | -1.56200 |
| H | 0.34100  | -1.69100 | 0.95100  |

### **Acetic acid**

|   |          |          |          |
|---|----------|----------|----------|
| C | -0.49500 | 0.27900  | 0.13200  |
| O | -0.96900 | 1.24400  | 0.71700  |
| O | -1.27000 | -0.62500 | -0.52200 |
| H | -2.20700 | -0.34800 | -0.42100 |
| C | 0.96500  | -0.06400 | 0.04300  |
| H | 1.56200  | 0.70700  | 0.53900  |
| H | 1.14600  | -1.03800 | 0.52200  |
| H | 1.26800  | -0.15500 | -1.00900 |

### **Glycerol**

|   |          |          |          |
|---|----------|----------|----------|
| O | -0.63300 | -0.33000 | -1.67900 |
| C | -0.12000 | 0.85100  | -1.00700 |
| C | 0.05900  | 0.64200  | 0.49800  |
| O | -1.21900 | 0.49200  | 1.15600  |
| C | 0.95400  | -0.55900 | 0.82500  |
| O | 0.27300  | -1.80100 | 0.54200  |
| H | -1.59500 | -0.35900 | -1.52500 |
| H | 0.85600  | 1.06400  | -1.46600 |
| H | -0.78700 | 1.70800  | -1.18900 |

|   |          |          |          |
|---|----------|----------|----------|
| H | 0.52700  | 1.55300  | 0.90500  |
| H | -1.39100 | -0.47300 | 1.17900  |
| H | 1.90000  | -0.48500 | 0.26100  |
| H | 1.18900  | -0.57600 | 1.89800  |
| H | -0.01300 | -1.72600 | -0.39700 |

#### **Ethanolamine (EA)**

|   |          |          |          |
|---|----------|----------|----------|
| N | -1.08500 | -0.78000 | -0.07400 |
| O | 1.64000  | -0.79100 | 0.18000  |
| C | -0.42200 | 0.48600  | 0.30500  |
| C | 1.01500  | 0.44500  | -0.21500 |
| H | -1.91300 | -0.93900 | 0.50300  |
| H | -1.40900 | -0.73600 | -1.04300 |
| H | 0.88800  | -1.43100 | 0.13100  |
| H | -0.93100 | 1.39100  | -0.07200 |
| H | -0.40800 | 0.54100  | 1.40400  |
| H | 1.60700  | 1.27400  | 0.19900  |
| H | 1.01800  | 0.53900  | -1.31800 |

#### **Diethylene glycol (DEG)**

|   |          |          |          |
|---|----------|----------|----------|
| C | 1.49100  | 1.22400  | 1.43100  |
| C | 1.22500  | 0.67200  | 0.04400  |
| O | 0.41000  | 2.04400  | 1.91600  |
| H | 2.38100  | 1.86700  | 1.39900  |
| H | 1.69000  | 0.39200  | 2.12900  |
| H | 2.11900  | 0.12900  | -0.31800 |
| H | 1.00500  | 1.49400  | -0.66200 |
| O | 0.10000  | -0.21600 | 0.12700  |
| C | -0.29100 | -0.73200 | -1.15500 |
| H | 0.51600  | -1.35700 | -1.58100 |
| H | -0.49100 | 0.10300  | -1.85200 |
| C | -1.54000 | -1.56900 | -0.96400 |
| H | -1.82200 | -2.02000 | -1.92500 |
| O | -2.67000 | -0.78900 | -0.53000 |
| H | -1.33300 | -2.38400 | -0.24700 |
| H | -2.40000 | -0.34600 | 0.29600  |
| H | -0.39100 | 1.48800  | 1.89400  |

### Levulinic acid

|   |          |          |          |
|---|----------|----------|----------|
| C | -1.69000 | 1.54800  | -0.91900 |
| H | -1.54500 | 2.62300  | -1.07100 |
| H | -1.96000 | 1.07700  | -1.87900 |
| H | -2.52900 | 1.36100  | -0.23400 |
| C | -0.44000 | 0.90200  | -0.40900 |
| C | -0.55700 | -0.50400 | 0.13600  |
| H | -0.93100 | -0.40600 | 1.17200  |
| H | -1.36100 | -1.01900 | -0.40900 |
| C | 0.71700  | -1.37200 | 0.08700  |
| H | 0.43500  | -2.42200 | 0.22200  |
| H | 1.18000  | -1.28400 | -0.91000 |
| C | 1.79200  | -1.06300 | 1.12100  |
| O | 2.24600  | 0.20100  | 1.16600  |
| H | 1.73400  | 0.76500  | 0.48600  |
| O | 2.26200  | -1.91100 | 1.87300  |
| O | 0.64700  | 1.50300  | -0.43200 |

### Guaiacol

|   |          |          |          |
|---|----------|----------|----------|
| C | 0.99900  | -0.83500 | -0.53500 |
| C | 0.34800  | -2.04500 | -0.76600 |
| C | -1.01400 | -2.17800 | -0.45700 |
| C | -1.71900 | -1.09900 | 0.08200  |
| C | -1.07100 | 0.12400  | 0.31800  |
| C | 0.28500  | 0.25900  | 0.01100  |
| H | -2.77900 | -1.19700 | 0.32300  |
| O | 1.04900  | 1.38900  | 0.18700  |
| C | 0.40700  | 2.55400  | 0.73900  |
| H | -1.62700 | 0.96200  | 0.73800  |
| H | -1.51700 | -3.12800 | -0.64100 |
| O | 2.33300  | -0.70400 | -0.83700 |
| H | 2.60000  | 0.20900  | -0.60100 |
| H | 0.02100  | 2.34700  | 1.74800  |
| H | -0.41200 | 2.89600  | 0.08800  |
| H | 1.18400  | 3.32300  | 0.79100  |
| H | 0.91500  | -2.87700 | -1.18800 |

### **Furfuryl alcohol**

|   |          |          |          |
|---|----------|----------|----------|
| C | -1.36900 | -0.84700 | 0.69100  |
| C | -0.11500 | -0.20400 | 0.21500  |
| C | 0.45800  | 1.02100  | 0.44100  |
| C | 1.66100  | 1.07200  | -0.34000 |
| C | 1.74200  | -0.12400 | -0.99600 |
| O | 0.67000  | -0.92100 | -0.67200 |
| O | -2.40000 | -0.93400 | -0.32500 |
| H | -1.18000 | -1.88500 | 0.99600  |
| H | -1.73000 | -0.29000 | 1.57000  |
| H | 0.06700  | 1.79700  | 1.09400  |
| H | 2.37300  | 1.89000  | -0.40300 |
| H | 2.45600  | -0.55500 | -1.69000 |
| H | -2.63200 | -0.02100 | -0.57900 |

### **2,3-butanediol**

|   |          |          |          |
|---|----------|----------|----------|
| C | -0.82900 | 0.27200  | 0.01300  |
| C | 0.70500  | 0.40500  | 0.06400  |
| O | -1.40700 | 1.58200  | -0.18300 |
| H | -1.16700 | -0.12800 | 0.99100  |
| C | -1.32800 | -0.62900 | -1.10600 |
| C | 1.42100  | -0.88400 | 0.44700  |
| O | 1.04900  | 1.48900  | 0.97200  |
| H | 1.05200  | 0.75900  | -0.92000 |
| H | 1.06200  | -1.25600 | 1.42000  |
| H | 2.50400  | -0.71000 | 0.51800  |
| H | 1.25200  | -1.67000 | -0.30200 |
| H | -2.42600 | -0.60200 | -1.14700 |
| H | -0.93600 | -0.29500 | -2.07900 |
| H | -1.02300 | -1.67100 | -0.94300 |
| H | -0.86400 | 2.17900  | 0.37300  |
| H | 0.93500  | 1.15700  | 1.88300  |

### **1,2-propanediol**

|   |          |          |          |
|---|----------|----------|----------|
| C | -1.49200 | -0.36900 | -0.04600 |
| C | -0.18900 | 0.39300  | -0.25100 |
| H | -1.31600 | -1.45700 | -0.05800 |
| H | -2.21200 | -0.12400 | -0.83900 |
| H | -1.94600 | -0.10900 | 0.92200  |
| H | -0.37800 | 1.47700  | -0.25800 |
| O | 0.39700  | 0.12800  | -1.55500 |
| C | 0.84600  | 0.08300  | 0.83200  |



|   |         |          |          |
|---|---------|----------|----------|
| H | 0.48200 | 0.41300  | 1.81500  |
| O | 2.08300 | 0.77400  | 0.59000  |
| H | 1.01400 | -1.01100 | 0.87400  |
| H | 0.44400 | -0.84100 | -1.66400 |
| H | 2.26700 | 0.64200  | -0.36300 |

### **Triethylene glycol**

|   |          |          |          |
|---|----------|----------|----------|
| C | 0.16300  | 1.35100  | 1.45500  |
| C | -1.02500 | 0.43200  | 1.70100  |
| O | 0.93700  | 0.96600  | 0.29600  |
| H | 0.80900  | 1.38200  | 2.34900  |
| H | -0.19500 | 2.37000  | 1.25100  |
| H | -1.52400 | 0.74800  | 2.63300  |
| H | -0.70100 | -0.61300 | 1.83400  |
| O | -1.97900 | 0.53000  | 0.62900  |
| C | -2.11300 | -0.60800 | -0.24600 |
| H | -3.13700 | -1.01000 | -0.15500 |
| H | -1.40500 | -1.40200 | 0.04400  |
| C | -1.87400 | -0.18700 | -1.68500 |
| H | -2.11100 | -1.02500 | -2.35700 |
| O | -0.50400 | 0.18900  | -1.94400 |
| H | -2.54300 | 0.65500  | -1.93700 |
| C | 1.93200  | -0.04800 | 0.58400  |
| C | 2.51000  | -0.58500 | -0.71500 |
| H | 1.48400  | -0.87600 | 1.16000  |
| H | 2.73600  | 0.40800  | 1.18900  |
| H | 2.80400  | 0.26300  | -1.36000 |
| O | 1.64600  | -1.49200 | -1.41400 |
| H | 3.42300  | -1.14900 | -0.46900 |
| H | 0.83600  | -0.98700 | -1.68900 |
| H | -0.16900 | 0.68800  | -1.15400 |

### **1,4-butanediol**

|   |          |          |          |
|---|----------|----------|----------|
| C | -0.37700 | 1.42400  | -0.91300 |
| C | 0.71900  | 0.35500  | -0.94100 |
| C | 0.98600  | -0.39500 | 0.37900  |
| C | -0.07100 | -1.40300 | 0.82700  |
| O | -1.71700 | 0.90100  | -0.85000 |
| O | -1.33000 | -0.79900 | 1.24300  |
| H | -0.19300 | 2.11800  | -0.06800 |
| H | -0.33000 | 2.01600  | -1.83900 |
| H | 1.65400  | 0.86200  | -1.23600 |
| H | 0.49100  | -0.36800 | -1.74200 |

|   |          |          |          |
|---|----------|----------|----------|
| H | 1.16200  | 0.33000  | 1.19400  |
| H | 1.92700  | -0.96100 | 0.27100  |
| H | 0.32000  | -2.01200 | 1.65700  |
| H | -0.33800 | -2.07900 | 0.00300  |
| H | -1.74300 | 0.31100  | -0.05100 |
| H | -1.16200 | -0.30100 | 2.06500  |

### Diethanolamine

|   |          |          |          |
|---|----------|----------|----------|
| N | -0.33300 | -0.58800 | -0.14500 |
| C | -0.12900 | 0.21500  | 2.17100  |
| C | -0.02100 | -0.99300 | 1.24100  |
| O | -1.40400 | 0.86000  | 1.99400  |
| C | 0.35900  | 0.46000  | -2.25100 |
| C | 0.82200  | -0.06200 | -0.89700 |
| O | -0.63600 | 1.49300  | -2.11000 |
| H | -0.71900 | -1.39000 | -0.64800 |
| H | -0.05400 | -0.10300 | 3.22100  |
| H | 0.69000  | 0.93200  | 1.97400  |
| H | -0.76500 | -1.74400 | 1.54300  |
| H | 0.98200  | -1.45100 | 1.33300  |
| H | -1.57200 | 0.75700  | 1.02900  |
| H | 1.20300  | 0.90000  | -2.79800 |
| H | -0.04200 | -0.37500 | -2.85600 |
| H | 1.26500  | 0.76400  | -0.32000 |
| H | 1.61000  | -0.82600 | -1.04800 |
| H | -1.25600 | 1.15100  | -1.43400 |

### Octanoic acid

|   |          |          |          |
|---|----------|----------|----------|
| C | 1.76400  | -0.63600 | -0.32600 |
| H | 1.73600  | -0.66000 | -1.42700 |
| H | 2.33000  | 0.26800  | -0.04800 |
| C | 2.49800  | -1.87500 | 0.19000  |
| H | 2.54600  | -1.87400 | 1.29200  |
| H | 1.95500  | -2.79600 | -0.07800 |
| C | 3.91100  | -2.02100 | -0.32000 |
| O | 4.50600  | -3.14200 | 0.17000  |
| H | 5.41800  | -3.18400 | -0.19300 |
| O | 4.48800  | -1.25500 | -1.07900 |
| C | 0.33600  | -0.54200 | 0.22500  |
| H | 0.37100  | -0.52500 | 1.32900  |
| H | -0.22200 | -1.45500 | -0.05000 |
| C | -0.43200 | 0.68800  | -0.27500 |
| H | -0.46800 | 0.67100  | -1.37900 |

|   |          |          |          |
|---|----------|----------|----------|
| H | 0.12400  | 1.60200  | 0.00100  |
| C | -1.86100 | 0.77900  | 0.27600  |
| H | -1.82400 | 0.79600  | 1.38000  |
| H | -2.41500 | -0.13700 | 0.00200  |
| C | -2.63800 | 2.00500  | -0.22000 |
| H | -2.08400 | 2.92000  | 0.05500  |
| H | -2.67500 | 1.98800  | -1.32300 |
| C | -4.06300 | 2.08300  | 0.33900  |
| H | -4.05600 | 2.13400  | 1.43900  |
| H | -4.59500 | 2.97200  | -0.03400 |
| H | -4.65100 | 1.19700  | 0.05100  |

### **1,2-butanediol**

|   |          |          |          |
|---|----------|----------|----------|
| C | 2.14200  | 0.10300  | 0.19100  |
| C | 0.85100  | -0.59200 | -0.25200 |
| H | 2.21500  | 1.11900  | -0.22500 |
| H | 3.02600  | -0.45500 | -0.14900 |
| H | 2.19600  | 0.18100  | 1.28800  |
| H | 0.82200  | -0.67200 | -1.35100 |
| C | -0.42000 | 0.11800  | 0.21900  |
| H | 0.83100  | -1.62200 | 0.14400  |
| O | -0.54500 | 1.45000  | -0.35000 |
| H | -0.41400 | 0.20300  | 1.32100  |
| C | -1.68700 | -0.61600 | -0.20500 |
| H | -1.69600 | -0.71600 | -1.30700 |
| O | -2.87300 | 0.06000  | 0.24700  |
| H | -1.70400 | -1.62300 | 0.23400  |
| H | -2.73600 | 0.99900  | 0.01200  |
| H | -0.01000 | 2.06300  | 0.18300  |

### **Hexanoic acid**

|   |          |          |          |
|---|----------|----------|----------|
| C | 2.26300  | -1.97100 | 1.42900  |
| H | 2.31500  | -2.72200 | 2.23100  |
| H | 2.60300  | -2.45100 | 0.49800  |
| H | 2.98000  | -1.17200 | 1.67200  |
| C | 0.84400  | -1.41200 | 1.27400  |
| H | 0.14300  | -2.23800 | 1.06200  |
| H | 0.51600  | -0.96800 | 2.23000  |
| C | 0.73000  | -0.35900 | 0.16500  |
| H | 1.43100  | 0.46900  | 0.37700  |
| H | 1.06000  | -0.80200 | -0.79100 |
| C | -0.68700 | 0.20500  | 0.00100  |
| H | -1.01900 | 0.65600  | 0.95000  |

|   |          |          |          |
|---|----------|----------|----------|
| H | -1.38900 | -0.61600 | -0.21700 |
| C | -0.76600 | 1.24900  | -1.11400 |
| H | -0.07800 | 2.08900  | -0.91600 |
| H | -0.43900 | 0.82400  | -2.07800 |
| C | -2.14000 | 1.83600  | -1.32100 |
| O | -3.14400 | 1.57300  | -0.67400 |
| O | -2.15300 | 2.73100  | -2.34700 |
| H | -3.06700 | 3.08100  | -2.43100 |

**Methyl diethanolamine (MDEA)**

|   |          |          |          |
|---|----------|----------|----------|
| C | -1.20000 | -0.65800 | 0.56900  |
| N | 0.00000  | 0.06600  | 0.10300  |
| C | 1.24200  | -0.61000 | 0.52900  |
| H | 1.09400  | -1.69200 | 0.39500  |
| H | 1.46400  | -0.42800 | 1.60100  |
| C | 2.43200  | -0.17000 | -0.32200 |
| H | 2.70200  | 0.88000  | -0.11300 |
| O | 2.14400  | -0.34000 | -1.72300 |
| H | 3.30500  | -0.79300 | -0.08400 |
| H | 1.19600  | -0.09700 | -1.80000 |
| C | -0.02000 | 1.47600  | 0.52600  |
| H | -1.01400 | -1.73300 | 0.42800  |
| C | -2.43300 | -0.26300 | -0.24200 |
| H | -1.39400 | -0.48500 | 1.64800  |
| H | -2.73700 | 0.77600  | -0.02000 |
| H | -3.27300 | -0.92000 | 0.02200  |
| O | -2.18400 | -0.41800 | -1.65200 |
| H | -1.24700 | -0.14200 | -1.75700 |
| H | 0.84800  | 2.00700  | 0.11700  |
| H | -0.00500 | 1.57300  | 1.63100  |
| H | -0.92100 | 1.97300  | 0.14500  |

**Ethylenecyanohydrin (ECH)**

|   |          |          |          |
|---|----------|----------|----------|
| C | 0.19300  | 0.78600  | -0.25800 |
| C | -0.86200 | -0.33700 | -0.14200 |
| C | 1.55600  | 0.30200  | -0.08400 |
| H | -0.00100 | 1.56300  | 0.49600  |
| H | 0.11600  | 1.26000  | -1.25000 |
| O | -0.92000 | -0.91700 | 1.16500  |
| H | -0.68200 | -1.10300 | -0.91200 |
| H | -1.84400 | 0.11700  | -0.32700 |
| N | 2.63400  | -0.11400 | 0.06200  |
| H | -0.19100 | -1.55700 | 1.25000  |
