# Supplementary material for: Accurate prediction of carbon dioxide capture by deep eutectic solvents using quantum chemistry and a neural network
Source: Royal Society of Chemistry journal article supplement (doi:10.1039/d2gc04425k), 2023-01-01
Supplement: d2gc04425k3.pdf [file d2gc04425k3.pdf]

*Supporting Information*

**Accurate Prediction of Carbon Dioxide Capture by Deep Eutectic Solvents using Quantum Chemistry and a Neural Network**

Mood Mohan<sup>\*,1,2,3</sup>, Omar Demerdash<sup>3</sup>, Blake A. Simmons<sup>1,4</sup>, Jeremy C. Smith<sup>3,5</sup>, Michelle Kidder<sup>6</sup>, and Seema Singh<sup>\*,1,2</sup>

<sup>1</sup> Deconstruction Division, Joint BioEnergy Institute, 5885 Hollis Street, Emeryville, California 94608, United States

<sup>2</sup> Bioresource and Environmental Security Department, Sandia National Laboratories, 7011 East Avenue, Livermore, California 94551, United States

<sup>3</sup> Center for Molecular Biophysics, Oak Ridge National Laboratory, Oak Ridge, Tennessee 37831, United States

<sup>4</sup> Biological Systems and Engineering Division, Lawrence Berkeley National Laboratory, 1 Cyclotron Road, Berkeley, California 94720, United States

<sup>5</sup> Department of Biochemistry and Cellular and Molecular Biology, University of Tennessee, Knoxville, Tennessee 37996, United States

<sup>6</sup> Manufacturing Science Division, Oak Ridge National Laboratory, Oak Ridge, Tennessee 37831-6201, United States

\*Corresponding Author

E-mail: [moodm@ornl.gov](mailto:moodm@ornl.gov); [mohanchauhan08@gmail.com](mailto:mohanchauhan08@gmail.com) (M. Mohan)

[Seema.Rose.Singh@gmail.com](mailto:Seema.Rose.Singh@gmail.com) (S. Singh)

Table S1: Experimental and predicted solubility of CO<sub>2</sub> in different DES using different prediction models.

| DES (HBA-HBD (molar ratio))    | T/(K)  | P/(kPa) | $\ln(x_{\text{CO}_2}^{\text{Exp.}})$ | $\ln(x_{\text{CO}_2}^{\text{COSMO-RS}})$ | $\ln(x_{\text{CO}_2}^{\text{MLR}})$ | $\ln(x_{\text{CO}_2}^{\text{ANN-ML}})$ | Reference                     |
|--------------------------------|--------|---------|--------------------------------------|------------------------------------------|-------------------------------------|----------------------------------------|-------------------------------|
| [ACh]Cl-1,2,4-triazole (1 : 1) | 303.15 | 63.7    | -5.71                                | -4.92                                    | -5.95                               | -5.80                                  | Li et al. (2018) <sup>1</sup> |
| [ACh]Cl-1,2,4-triazole (1 : 1) | 303.15 | 107.6   | -5.24                                | -4.40                                    | -5.43                               | -5.30                                  |                               |
| [ACh]Cl-1,2,4-triazole (1 : 1) | 303.15 | 192.5   | -4.68                                | -3.83                                    | -4.86                               | -4.65                                  |                               |
| [ACh]Cl-1,2,4-triazole (1 : 1) | 303.15 | 288.3   | -4.30                                | -3.44                                    | -4.46                               | -4.21                                  |                               |
| [ACh]Cl-1,2,4-triazole (1 : 1) | 303.15 | 382.9   | -4.03                                | -3.16                                    | -4.18                               | -3.91                                  |                               |
| [ACh]Cl-1,2,4-triazole (1 : 1) | 303.15 | 496.8   | -3.78                                | -2.91                                    | -3.93                               | -3.63                                  |                               |
| [ACh]Cl-1,2,4-triazole (1 : 1) | 303.15 | 587.7   | -3.62                                | -2.76                                    | -3.77                               | -3.44                                  |                               |
| [ACh]Cl-1,2,4-triazole (1 : 1) | 313.15 | 56.3    | -6.07                                | -5.29                                    | -6.16                               | -6.07                                  |                               |
| [ACh]Cl-1,2,4-triazole (1 : 1) | 313.15 | 101.6   | -5.52                                | -4.70                                    | -5.58                               | -5.53                                  |                               |
| [ACh]Cl-1,2,4-triazole (1 : 1) | 313.15 | 219.6   | -4.76                                | -3.94                                    | -4.81                               | -4.68                                  |                               |
| [ACh]Cl-1,2,4-triazole (1 : 1) | 313.15 | 366.6   | -4.25                                | -3.44                                    | -4.31                               | -4.13                                  |                               |
| [ACh]Cl-1,2,4-triazole (1 : 1) | 313.15 | 444.5   | -4.06                                | -3.25                                    | -4.12                               | -3.93                                  |                               |
| [ACh]Cl-1,2,4-triazole (1 : 1) | 313.15 | 523.9   | -3.89                                | -3.10                                    | -3.96                               | -3.75                                  |                               |
| [ACh]Cl-1,2,4-triazole (1 : 1) | 313.15 | 572.2   | -3.79                                | -3.01                                    | -3.87                               | -3.65                                  |                               |
| [ACh]Cl-1,2,4-triazole (1 : 1) | 323.15 | 58.4    | -6.27                                | -5.48                                    | -6.21                               | -6.19                                  |                               |
| [ACh]Cl-1,2,4-triazole (1 : 1) | 323.15 | 147.7   | -5.34                                | -4.56                                    | -5.28                               | -5.28                                  |                               |
| [ACh]Cl-1,2,4-triazole (1 : 1) | 323.15 | 251.5   | -4.88                                | -4.03                                    | -4.76                               | -4.69                                  |                               |
| [ACh]Cl-1,2,4-triazole (1 : 1) | 323.15 | 340.7   | -4.55                                | -3.73                                    | -4.45                               | -4.37                                  |                               |
| [ACh]Cl-1,2,4-triazole (1 : 1) | 323.15 | 439     | -4.30                                | -3.48                                    | -4.20                               | -4.10                                  |                               |
| [ACh]Cl-1,2,4-triazole (1 : 1) | 323.15 | 542     | -4.07                                | -3.28                                    | -4.00                               | -3.87                                  |                               |
| [ACh]Cl-1,2,4-triazole (1 : 1) | 323.15 | 593.2   | -3.98                                | -3.19                                    | -3.91                               | -3.77                                  |                               |
| [ACh]Cl-1,2,4-triazole (1 : 1) | 333.15 | 56.3    | -6.44                                | -5.73                                    | -6.32                               | -6.35                                  |                               |
| [ACh]Cl-1,2,4-triazole (1 : 1) | 333.15 | 116.3   | -5.68                                | -5.00                                    | -5.60                               | -5.69                                  |                               |
| [ACh]Cl-1,2,4-triazole (1 : 1) | 333.15 | 186.5   | -5.28                                | -4.54                                    | -5.13                               | -5.17                                  |                               |
| [ACh]Cl-1,2,4-triazole (1 : 1) | 333.15 | 290.9   | -4.84                                | -4.10                                    | -4.68                               | -4.68                                  |                               |
| [ACh]Cl-1,2,4-triazole (1 : 1) | 333.15 | 396.1   | -4.56                                | -3.79                                    | -4.38                               | -4.36                                  |                               |

|                                |        |        |       |       |       |       |                                       |
|--------------------------------|--------|--------|-------|-------|-------|-------|---------------------------------------|
| [ACh]Cl-1,2,4-triazole (1 : 1) | 333.15 | 487.4  | -4.33 | -3.59 | -4.17 | -4.13 |                                       |
| [ACh]Cl-1,2,4-triazole (1 : 1) | 333.15 | 581    | -4.15 | -3.42 | -4.00 | -3.94 |                                       |
| Thymol-2,6-xylenol (1 : 1)     | 293.15 | 3905.7 | -0.94 | -0.25 | -1.33 | -1.08 | Alhadid et al.<br>(2022) <sup>2</sup> |
| Thymol-2,6-xylenol (1 : 1)     | 293.15 | 3198.8 | -1.15 | -0.37 | -1.47 | -1.22 |                                       |
| Thymol-2,6-xylenol (1 : 1)     | 293.15 | 2593.2 | -1.34 | -0.50 | -1.62 | -1.35 |                                       |
| Thymol-2,6-xylenol (1 : 1)     | 293.15 | 1607   | -1.79 | -0.84 | -1.99 | -1.63 |                                       |
| Thymol-2,6-xylenol (1 : 1)     | 303.15 | 3984   | -1.05 | -0.38 | -1.29 | -1.21 |                                       |
| Thymol-2,6-xylenol (1 : 1)     | 303.15 | 3256.3 | -1.25 | -0.51 | -1.45 | -1.36 |                                       |
| Thymol-2,6-xylenol (1 : 1)     | 303.15 | 2634.4 | -1.43 | -0.66 | -1.61 | -1.50 |                                       |
| Thymol-2,6-xylenol (1 : 1)     | 303.15 | 1630   | -1.90 | -1.02 | -2.00 | -1.78 |                                       |
| Thymol-2,6-xylenol (1 : 1)     | 313.15 | 4044.1 | -1.18 | -0.51 | -1.27 | -1.36 |                                       |
| Thymol-2,6-xylenol (1 : 1)     | 313.15 | 3302.9 | -1.33 | -0.65 | -1.43 | -1.51 |                                       |
| Thymol-2,6-xylenol (1 : 1)     | 313.15 | 2669.6 | -1.55 | -0.81 | -1.60 | -1.65 |                                       |
| Thymol-2,6-xylenol (1 : 1)     | 313.15 | 1650   | -1.98 | -1.19 | -2.02 | -1.93 |                                       |
| Thymol-2,6-xylenol (1 : 1)     | 323.15 | 4085.3 | -1.25 | -0.64 | -1.26 | -1.49 |                                       |
| Thymol-2,6-xylenol (1 : 1)     | 323.15 | 3338   | -1.40 | -0.79 | -1.43 | -1.64 |                                       |
| Thymol-2,6-xylenol (1 : 1)     | 323.15 | 2698.8 | -1.61 | -0.96 | -1.61 | -1.78 |                                       |
| Thymol-2,6-xylenol (1 : 1)     | 323.15 | 1667   | -2.07 | -1.36 | -2.04 | -2.06 |                                       |
| [Ch]Cl-Urea (1 : 1.5)          | 313.15 | 1070   | -2.98 | -2.66 | -3.50 | -2.92 | Li et al. (2008) <sup>3</sup>         |
| [Ch]Cl-Urea (1 : 1.5)          | 313.15 | 2520   | -2.34 | -1.96 | -2.70 | -2.20 |                                       |
| [Ch]Cl-Urea (1 : 1.5)          | 313.15 | 4210   | -2.10 | -1.56 | -2.19 | -1.83 |                                       |
| [Ch]Cl-Urea (1 : 1.5)          | 313.15 | 6090   | -1.84 | -1.27 | -1.78 | -1.45 |                                       |
| [Ch]Cl-Urea (1 : 1.5)          | 323.15 | 850    | -3.41 | -3.08 | -3.80 | -3.32 |                                       |
| [Ch]Cl-Urea (1 : 1.5)          | 323.15 | 2330   | -2.54 | -2.21 | -2.84 | -2.39 |                                       |
| [Ch]Cl-Urea (1 : 1.5)          | 323.15 | 3690   | -2.33 | -1.84 | -2.38 | -2.08 |                                       |
| [Ch]Cl-Urea (1 : 1.5)          | 323.15 | 6130   | -1.94 | -1.43 | -1.81 | -1.58 |                                       |
| [Ch]Cl-Urea (1 : 1.5)          | 333.15 | 1230   | -3.27 | -2.95 | -3.53 | -3.05 |                                       |

|                           |        |       |       |       |       |       |                               |
|---------------------------|--------|-------|-------|-------|-------|-------|-------------------------------|
| [Ch]Cl-Urea (1 : 1.5)     | 333.15 | 2590  | -2.67 | -2.30 | -2.79 | -2.45 |                               |
| [Ch]Cl-Urea (1 : 1.5)     | 333.15 | 4780  | -2.32 | -1.80 | -2.14 | -1.98 |                               |
| [Ch]Cl-Urea (1 : 1.5)     | 333.15 | 6550  | -2.10 | -1.54 | -1.77 | -1.62 |                               |
| [ACh]Cl-Imidazole (2 : 3) | 303.15 | 30.2  | -7.13 | -5.63 | -6.67 | -6.37 | Li et al. (2018) <sup>1</sup> |
| [ACh]Cl-Imidazole (2 : 3) | 303.15 | 86.7  | -5.47 | -4.58 | -5.61 | -5.65 |                               |
| [ACh]Cl-Imidazole (2 : 3) | 303.15 | 198.4 | -4.65 | -3.76 | -4.79 | -4.80 |                               |
| [ACh]Cl-Imidazole (2 : 3) | 303.15 | 300.3 | -4.29 | -3.35 | -4.37 | -4.37 |                               |
| [ACh]Cl-Imidazole (2 : 3) | 303.15 | 388.1 | -4.05 | -3.10 | -4.12 | -4.11 |                               |
| [ACh]Cl-Imidazole (2 : 3) | 303.15 | 486.8 | -3.84 | -2.88 | -3.89 | -3.87 |                               |
| [ACh]Cl-Imidazole (2 : 3) | 303.15 | 572.6 | -3.68 | -2.73 | -3.73 | -3.70 |                               |
| [ACh]Cl-Imidazole (2 : 3) | 313.15 | 65.21 | -5.95 | -5.10 | -6.00 | -6.06 |                               |
| [ACh]Cl-Imidazole (2 : 3) | 313.15 | 147.7 | -5.26 | -4.29 | -5.18 | -5.29 |                               |
| [ACh]Cl-Imidazole (2 : 3) | 313.15 | 201.4 | -4.96 | -3.98 | -4.87 | -4.96 |                               |
| [ACh]Cl-Imidazole (2 : 3) | 313.15 | 295.9 | -4.58 | -3.60 | -4.49 | -4.56 |                               |
| [ACh]Cl-Imidazole (2 : 3) | 313.15 | 427.6 | -4.17 | -3.24 | -4.12 | -4.19 |                               |
| [ACh]Cl-Imidazole (2 : 3) | 313.15 | 547.6 | -3.91 | -3.00 | -3.87 | -3.92 |                               |
| [ACh]Cl-Imidazole (2 : 3) | 323.15 | 29.8  | -6.50 | -6.10 | -6.88 | -6.69 |                               |
| [ACh]Cl-Imidazole (2 : 3) | 323.15 | 111   | -5.52 | -4.79 | -5.56 | -5.74 |                               |
| [ACh]Cl-Imidazole (2 : 3) | 323.15 | 148.6 | -5.32 | -4.50 | -5.27 | -5.44 |                               |
| [ACh]Cl-Imidazole (2 : 3) | 323.15 | 238.5 | -4.89 | -4.03 | -4.79 | -4.95 |                               |
| [ACh]Cl-Imidazole (2 : 3) | 323.15 | 329.1 | -4.60 | -3.71 | -4.47 | -4.62 |                               |
| [ACh]Cl-Imidazole (2 : 3) | 323.15 | 425.7 | -4.34 | -3.46 | -4.21 | -4.35 |                               |
| [ACh]Cl-Imidazole (2 : 3) | 323.15 | 529.8 | -4.14 | -3.25 | -3.99 | -4.12 |                               |
| [ACh]Cl-Imidazole (2 : 3) | 323.15 | 589.2 | -4.03 | -3.14 | -3.88 | -4.00 |                               |
| [ACh]Cl-Imidazole (2 : 3) | 333.15 | 33    | -6.81 | -6.21 | -6.86 | -6.77 |                               |
| [ACh]Cl-Imidazole (2 : 3) | 333.15 | 92.3  | -5.99 | -5.18 | -5.83 | -6.05 |                               |
| [ACh]Cl-Imidazole (2 : 3) | 333.15 | 141.7 | -5.63 | -4.75 | -5.40 | -5.63 |                               |
| [ACh]Cl-Imidazole (2 : 3) | 333.15 | 235.4 | -5.12 | -4.25 | -4.89 | -5.10 |                               |

|                           |        |       |       |       |       |       |                                      |
|---------------------------|--------|-------|-------|-------|-------|-------|--------------------------------------|
| [ACh]Cl-Imidazole (2 : 3) | 333.15 | 346.1 | -4.74 | -3.87 | -4.50 | -4.71 |                                      |
| [ACh]Cl-Imidazole (2 : 3) | 333.15 | 441.6 | -4.51 | -3.63 | -4.25 | -4.46 |                                      |
| [ACh]Cl-Imidazole (2 : 3) | 333.15 | 536.3 | -4.31 | -3.44 | -4.06 | -4.25 |                                      |
| [ACh]Cl-Imidazole (2 : 3) | 333.15 | 594   | -4.20 | -3.34 | -3.95 | -4.13 |                                      |
| [TOA]Cl-DecA (1 : 1.5)    | 298.15 | 90    | -4.09 | -3.66 | -4.76 | -4.07 | Zubeir et al.<br>(2018) <sup>4</sup> |
| [TOA]Cl-DecA (1 : 1.5)    | 298.15 | 190   | -3.36 | -2.93 | -4.03 | -3.33 |                                      |
| [TOA]Cl-DecA (1 : 1.5)    | 298.15 | 290   | -2.98 | -2.52 | -3.62 | -2.91 |                                      |
| [TOA]Cl-DecA (1 : 1.5)    | 298.15 | 390   | -2.69 | -2.25 | -3.34 | -2.63 |                                      |
| [TOA]Cl-DecA (1 : 1.5)    | 298.15 | 490   | -2.47 | -2.04 | -3.12 | -2.43 |                                      |
| [TOA]Cl-DecA (1 : 1.5)    | 298.15 | 790   | -2.00 | -1.62 | -2.68 | -1.97 |                                      |
| [TOA]Cl-DecA (1 : 1.5)    | 298.15 | 990   | -1.80 | -1.43 | -2.48 | -1.76 |                                      |
| [TOA]Cl-DecA (1 : 1.5)    | 298.15 | 1490  | -1.45 | -1.10 | -2.12 | -1.39 |                                      |
| [TOA]Cl-DecA (1 : 1.5)    | 298.15 | 1990  | -1.21 | -0.78 | -1.76 | -1.18 |                                      |
| [TOA]Cl-DecA (1 : 1.5)    | 308.15 | 90    | -4.21 | -3.88 | -4.85 | -4.22 |                                      |
| [TOA]Cl-DecA (1 : 1.5)    | 308.15 | 190   | -3.49 | -3.15 | -4.11 | -3.49 |                                      |
| [TOA]Cl-DecA (1 : 1.5)    | 308.15 | 290   | -3.09 | -2.74 | -3.69 | -3.07 |                                      |
| [TOA]Cl-DecA (1 : 1.5)    | 308.15 | 390   | -2.79 | -2.46 | -3.41 | -2.80 |                                      |
| [TOA]Cl-DecA (1 : 1.5)    | 308.15 | 490   | -2.58 | -2.25 | -3.19 | -2.59 |                                      |
| [TOA]Cl-DecA (1 : 1.5)    | 308.15 | 690   | -2.25 | -1.93 | -2.86 | -2.26 |                                      |
| [TOA]Cl-DecA (1 : 1.5)    | 308.15 | 790   | -2.13 | -1.81 | -2.73 | -2.13 |                                      |
| [TOA]Cl-DecA (1 : 1.5)    | 308.15 | 990   | -1.93 | -1.62 | -2.53 | -1.91 |                                      |
| [TOA]Cl-DecA (1 : 1.5)    | 308.15 | 1190  | -1.77 | -1.46 | -2.36 | -1.74 |                                      |
| [TOA]Cl-DecA (1 : 1.5)    | 308.15 | 1490  | -1.57 | -1.28 | -2.15 | -1.54 |                                      |
| [TOA]Cl-DecA (1 : 1.5)    | 308.15 | 1790  | -1.42 | -1.13 | -1.99 | -1.40 |                                      |
| [TOA]Cl-DecA (1 : 1.5)    | 308.15 | 1990  | -1.33 | -1.05 | -1.90 | -1.33 |                                      |
| [Ch]Cl-EG (1 : 2)         | 303.15 | 236   | -4.68 | -4.13 | -5.15 | -4.75 | Leron and Li,<br>(2013) <sup>5</sup> |
| [Ch]Cl-EG (1 : 2)         | 303.15 | 537   | -3.83 | -3.31 | -4.31 | -3.87 |                                      |

|                   |        |      |       |       |       |       |  |
|-------------------|--------|------|-------|-------|-------|-------|--|
| [Ch]Cl-EG (1 : 2) | 303.15 | 1004 | -3.20 | -2.69 | -3.64 | -3.16 |  |
| [Ch]Cl-EG (1 : 2) | 303.15 | 1923 | -2.55 | -2.05 | -2.91 | -2.53 |  |
| [Ch]Cl-EG (1 : 2) | 303.15 | 2760 | -2.19 | -1.68 | -2.46 | -2.28 |  |
| [Ch]Cl-EG (1 : 2) | 303.15 | 3849 | -1.89 | -1.33 | -1.99 | -2.06 |  |
| [Ch]Cl-EG (1 : 2) | 303.15 | 4971 | -1.65 | -1.01 | -1.56 | -1.85 |  |
| [Ch]Cl-EG (1 : 2) | 303.15 | 5863 | -1.53 | -0.73 | -1.19 | -1.69 |  |
| [Ch]Cl-EG (1 : 2) | 313.15 | 248  | -4.85 | -4.29 | -5.20 | -4.89 |  |
| [Ch]Cl-EG (1 : 2) | 313.15 | 565  | -4.01 | -3.47 | -4.35 | -4.01 |  |
| [Ch]Cl-EG (1 : 2) | 313.15 | 1055 | -3.37 | -2.85 | -3.68 | -3.30 |  |
| [Ch]Cl-EG (1 : 2) | 313.15 | 1928 | -2.77 | -2.25 | -2.99 | -2.71 |  |
| [Ch]Cl-EG (1 : 2) | 313.15 | 2782 | -2.40 | -1.89 | -2.54 | -2.46 |  |
| [Ch]Cl-EG (1 : 2) | 313.15 | 3889 | -2.07 | -1.54 | -2.08 | -2.24 |  |
| [Ch]Cl-EG (1 : 2) | 313.15 | 5040 | -1.82 | -1.25 | -1.67 | -2.03 |  |
| [Ch]Cl-EG (1 : 2) | 313.15 | 5902 | -1.68 | -1.04 | -1.38 | -1.87 |  |
| [Ch]Cl-EG (1 : 2) | 323.15 | 306  | -4.86 | -4.28 | -5.06 | -4.85 |  |
| [Ch]Cl-EG (1 : 2) | 323.15 | 603  | -4.16 | -3.60 | -4.36 | -4.13 |  |
| [Ch]Cl-EG (1 : 2) | 323.15 | 1092 | -3.56 | -3.01 | -3.72 | -3.44 |  |
| [Ch]Cl-EG (1 : 2) | 323.15 | 1950 | -2.99 | -2.43 | -3.06 | -2.87 |  |
| [Ch]Cl-EG (1 : 2) | 323.15 | 2833 | -2.61 | -2.06 | -2.59 | -2.62 |  |
| [Ch]Cl-EG (1 : 2) | 323.15 | 3948 | -2.26 | -1.72 | -2.14 | -2.40 |  |
| [Ch]Cl-EG (1 : 2) | 323.15 | 5110 | -2.02 | -1.44 | -1.75 | -2.19 |  |
| [Ch]Cl-EG (1 : 2) | 323.15 | 6167 | -1.82 | -1.22 | -1.42 | -2.00 |  |
| [Ch]Cl-EG (1 : 2) | 333.15 | 332  | -4.99 | -4.38 | -5.06 | -4.94 |  |
| [Ch]Cl-EG (1 : 2) | 333.15 | 637  | -4.32 | -3.73 | -4.38 | -4.24 |  |
| [Ch]Cl-EG (1 : 2) | 333.15 | 1094 | -3.78 | -3.19 | -3.79 | -3.60 |  |
| [Ch]Cl-EG (1 : 2) | 333.15 | 1948 | -3.20 | -2.61 | -3.13 | -3.03 |  |
| [Ch]Cl-EG (1 : 2) | 333.15 | 2831 | -2.84 | -2.24 | -2.67 | -2.78 |  |
| [Ch]Cl-EG (1 : 2) | 333.15 | 3944 | -2.54 | -1.90 | -2.22 | -2.56 |  |

|                      |        |      |       |       |       |       |                                      |
|----------------------|--------|------|-------|-------|-------|-------|--------------------------------------|
| [Ch]Cl-EG (1 : 2)    | 333.15 | 5188 | -2.23 | -1.62 | -1.81 | -2.33 |                                      |
| [Ch]Cl-EG (1 : 2)    | 333.15 | 6104 | -2.10 | -1.44 | -1.54 | -2.16 |                                      |
| [Ch]Cl-EG (1 : 2)    | 343.15 | 378  | -5.07 | -4.42 | -4.99 | -4.97 |                                      |
| [Ch]Cl-EG (1 : 2)    | 343.15 | 659  | -4.52 | -3.86 | -4.41 | -4.37 |                                      |
| [Ch]Cl-EG (1 : 2)    | 343.15 | 1113 | -4.01 | -3.34 | -3.84 | -3.74 |                                      |
| [Ch]Cl-EG (1 : 2)    | 343.15 | 1960 | -3.46 | -2.78 | -3.19 | -3.18 |                                      |
| [Ch]Cl-EG (1 : 2)    | 343.15 | 2862 | -3.08 | -2.40 | -2.72 | -2.93 |                                      |
| [Ch]Cl-EG (1 : 2)    | 343.15 | 4024 | -2.74 | -2.05 | -2.26 | -2.70 |                                      |
| [Ch]Cl-EG (1 : 2)    | 343.15 | 5267 | -2.48 | -1.77 | -1.86 | -2.47 |                                      |
| [Ch]Cl-EG (1 : 2)    | 343.15 | 6323 | -2.34 | -1.58 | -1.56 | -2.28 |                                      |
| [TOA]Br-DecA (1 : 2) | 298.15 | 90   | -4.17 | -3.61 | -4.71 | -4.25 | Zubeir et al.<br>(2018) <sup>4</sup> |
| [TOA]Br-DecA (1 : 2) | 298.15 | 190  | -3.44 | -2.89 | -3.98 | -3.48 |                                      |
| [TOA]Br-DecA (1 : 2) | 298.15 | 290  | -3.02 | -2.49 | -3.58 | -3.05 |                                      |
| [TOA]Br-DecA (1 : 2) | 298.15 | 390  | -2.74 | -2.22 | -3.30 | -2.77 |                                      |
| [TOA]Br-DecA (1 : 2) | 298.15 | 490  | -2.54 | -2.02 | -3.09 | -2.56 |                                      |
| [TOA]Br-DecA (1 : 2) | 298.15 | 790  | -2.08 | -1.61 | -2.65 | -2.11 |                                      |
| [TOA]Br-DecA (1 : 2) | 298.15 | 990  | -1.87 | -1.43 | -2.45 | -1.89 |                                      |
| [TOA]Br-DecA (1 : 2) | 298.15 | 1490 | -1.51 | -1.12 | -2.09 | -1.52 |                                      |
| [TOA]Br-DecA (1 : 2) | 298.15 | 1990 | -1.26 | -0.76 | -1.68 | -1.28 |                                      |
| [TOA]Br-DecA (1 : 2) | 308.15 | 90   | -4.30 | -3.84 | -4.82 | -4.38 |                                      |
| [TOA]Br-DecA (1 : 2) | 308.15 | 190  | -3.58 | -3.11 | -4.08 | -3.61 |                                      |
| [TOA]Br-DecA (1 : 2) | 308.15 | 290  | -3.17 | -2.71 | -3.67 | -3.18 |                                      |
| [TOA]Br-DecA (1 : 2) | 308.15 | 390  | -2.88 | -2.43 | -3.38 | -2.90 |                                      |
| [TOA]Br-DecA (1 : 2) | 308.15 | 490  | -2.67 | -2.22 | -3.17 | -2.69 |                                      |
| [TOA]Br-DecA (1 : 2) | 308.15 | 790  | -2.21 | -1.80 | -2.72 | -2.23 |                                      |
| [TOA]Br-DecA (1 : 2) | 308.15 | 990  | -2.00 | -1.62 | -2.51 | -2.00 |                                      |
| [TOA]Br-DecA (1 : 2) | 308.15 | 1490 | -1.64 | -1.29 | -2.13 | -1.62 |                                      |
| [TOA]Br-DecA (1 : 2) | 308.15 | 1990 | -1.39 | -0.94 | -1.73 | -1.37 |                                      |

|                      |        |      |       |       |       |       |                                      |
|----------------------|--------|------|-------|-------|-------|-------|--------------------------------------|
| [TOA]Br-DecA (1 : 2) | 323.15 | 90   | -4.47 | -4.15 | -4.96 | -4.56 |                                      |
| [TOA]Br-DecA (1 : 2) | 323.15 | 190  | -3.74 | -3.42 | -4.22 | -3.81 |                                      |
| [TOA]Br-DecA (1 : 2) | 323.15 | 290  | -3.34 | -3.01 | -3.80 | -3.37 |                                      |
| [TOA]Br-DecA (1 : 2) | 323.15 | 390  | -3.06 | -2.73 | -3.51 | -3.09 |                                      |
| [TOA]Br-DecA (1 : 2) | 323.15 | 490  | -2.84 | -2.51 | -3.28 | -2.87 |                                      |
| [TOA]Br-DecA (1 : 2) | 323.15 | 790  | -2.39 | -2.08 | -2.82 | -2.39 |                                      |
| [TOA]Br-DecA (1 : 2) | 323.15 | 990  | -2.18 | -1.88 | -2.60 | -2.16 |                                      |
| [TOA]Br-DecA (1 : 2) | 323.15 | 1490 | -1.81 | -1.53 | -2.20 | -1.74 |                                      |
| [TOA]Br-DecA (1 : 2) | 323.15 | 1990 | -1.55 | -1.30 | -1.92 | -1.47 |                                      |
| [TOA]Cl-DecA (1 : 2) | 298.15 | 90   | -4.17 | -3.72 | -4.82 | -4.11 | Zubeir et al.<br>(2018) <sup>4</sup> |
| [TOA]Cl-DecA (1 : 2) | 298.15 | 190  | -3.45 | -2.99 | -4.08 | -3.36 |                                      |
| [TOA]Cl-DecA (1 : 2) | 298.15 | 290  | -3.03 | -2.58 | -3.67 | -2.94 |                                      |
| [TOA]Cl-DecA (1 : 2) | 298.15 | 390  | -2.74 | -2.31 | -3.38 | -2.67 |                                      |
| [TOA]Cl-DecA (1 : 2) | 298.15 | 490  | -2.53 | -2.10 | -3.16 | -2.48 |                                      |
| [TOA]Cl-DecA (1 : 2) | 298.15 | 690  | -2.20 | -1.79 | -2.84 | -2.18 |                                      |
| [TOA]Cl-DecA (1 : 2) | 298.15 | 790  | -2.08 | -1.67 | -2.71 | -2.06 |                                      |
| [TOA]Cl-DecA (1 : 2) | 298.15 | 990  | -1.87 | -1.48 | -2.50 | -1.87 |                                      |
| [TOA]Cl-DecA (1 : 2) | 298.15 | 1190 | -1.70 | -1.33 | -2.33 | -1.72 |                                      |
| [TOA]Cl-DecA (1 : 2) | 298.15 | 1490 | -1.50 | -1.15 | -2.12 | -1.55 |                                      |
| [TOA]Cl-DecA (1 : 2) | 298.15 | 1790 | -1.34 | -0.90 | -1.83 | -1.42 |                                      |
| [TOA]Cl-DecA (1 : 2) | 298.15 | 1990 | -1.26 | -0.82 | -1.73 | -1.36 |                                      |
| [TOA]Cl-DecA (1 : 2) | 308.15 | 90   | -4.28 | -3.94 | -4.92 | -4.29 |                                      |
| [TOA]Cl-DecA (1 : 2) | 308.15 | 190  | -3.57 | -3.21 | -4.18 | -3.54 |                                      |
| [TOA]Cl-DecA (1 : 2) | 308.15 | 290  | -3.17 | -2.80 | -3.76 | -3.12 |                                      |
| [TOA]Cl-DecA (1 : 2) | 308.15 | 390  | -2.86 | -2.52 | -3.47 | -2.86 |                                      |
| [TOA]Cl-DecA (1 : 2) | 308.15 | 490  | -2.65 | -2.31 | -3.25 | -2.66 |                                      |
| [TOA]Cl-DecA (1 : 2) | 308.15 | 690  | -2.34 | -1.99 | -2.91 | -2.36 |                                      |
| [TOA]Cl-DecA (1 : 2) | 308.15 | 790  | -2.20 | -1.87 | -2.78 | -2.24 |                                      |



|                           |        |       |       |       |       |       |                               |
|---------------------------|--------|-------|-------|-------|-------|-------|-------------------------------|
| [TOA]Cl-DecA (1 : 2)      | 308.15 | 990   | -2.00 | -1.67 | -2.57 | -2.04 |                               |
| [TOA]Cl-DecA (1 : 2)      | 308.15 | 1190  | -1.83 | -1.52 | -2.39 | -1.89 |                               |
| [TOA]Cl-DecA (1 : 2)      | 308.15 | 1490  | -1.63 | -1.33 | -2.17 | -1.72 |                               |
| [TOA]Cl-DecA (1 : 2)      | 308.15 | 1790  | -1.47 | -1.18 | -1.99 | -1.59 |                               |
| [TOA]Cl-DecA (1 : 2)      | 308.15 | 1990  | -1.38 | -1.10 | -1.89 | -1.53 |                               |
| [ACh]Cl-Imidazole (1 : 2) | 303.15 | 26.6  | -6.27 | -5.77 | -6.82 | -6.42 | Li et al. (2018) <sup>1</sup> |
| [ACh]Cl-Imidazole (1 : 2) | 303.15 | 57.2  | -5.68 | -5.01 | -6.05 | -5.98 |                               |
| [ACh]Cl-Imidazole (1 : 2) | 303.15 | 93.2  | -5.30 | -4.52 | -5.57 | -5.56 |                               |
| [ACh]Cl-Imidazole (1 : 2) | 303.15 | 141.4 | -4.91 | -4.11 | -5.15 | -5.14 |                               |
| [ACh]Cl-Imidazole (1 : 2) | 303.15 | 240   | -4.40 | -3.59 | -4.61 | -4.57 |                               |
| [ACh]Cl-Imidazole (1 : 2) | 303.15 | 331.4 | -4.11 | -3.27 | -4.29 | -4.24 |                               |
| [ACh]Cl-Imidazole (1 : 2) | 303.15 | 422   | -3.89 | -3.03 | -4.04 | -4.00 |                               |
| [ACh]Cl-Imidazole (1 : 2) | 303.15 | 525.7 | -3.71 | -2.82 | -3.82 | -3.78 |                               |
| [ACh]Cl-Imidazole (1 : 2) | 303.15 | 578.5 | -3.62 | -2.72 | -3.72 | -3.68 |                               |
| [ACh]Cl-Imidazole (1 : 2) | 313.15 | 29.6  | -6.91 | -5.90 | -6.83 | -6.53 |                               |
| [ACh]Cl-Imidazole (1 : 2) | 313.15 | 59.9  | -6.03 | -5.20 | -6.13 | -6.11 |                               |
| [ACh]Cl-Imidazole (1 : 2) | 313.15 | 100   | -5.55 | -4.69 | -5.61 | -5.66 |                               |
| [ACh]Cl-Imidazole (1 : 2) | 313.15 | 149.8 | -5.17 | -4.29 | -5.20 | -5.25 |                               |
| [ACh]Cl-Imidazole (1 : 2) | 313.15 | 242.3 | -4.70 | -3.81 | -4.72 | -4.74 |                               |
| [ACh]Cl-Imidazole (1 : 2) | 313.15 | 335.8 | -4.38 | -3.49 | -4.39 | -4.40 |                               |
| [ACh]Cl-Imidazole (1 : 2) | 313.15 | 426.5 | -4.15 | -3.25 | -4.14 | -4.17 |                               |
| [ACh]Cl-Imidazole (1 : 2) | 313.15 | 529.8 | -3.94 | -3.04 | -3.92 | -3.94 |                               |
| [ACh]Cl-Imidazole (1 : 2) | 313.15 | 588.2 | -3.84 | -2.94 | -3.81 | -3.83 |                               |
| [ACh]Cl-Imidazole (1 : 2) | 323.15 | 27.5  | -7.01 | -6.20 | -7.01 | -6.71 |                               |
| [ACh]Cl-Imidazole (1 : 2) | 323.15 | 88.3  | -5.81 | -5.03 | -5.84 | -5.94 |                               |
| [ACh]Cl-Imidazole (1 : 2) | 323.15 | 142.6 | -5.36 | -4.55 | -5.36 | -5.46 |                               |
| [ACh]Cl-Imidazole (1 : 2) | 323.15 | 232.3 | -4.91 | -4.07 | -4.87 | -4.94 |                               |
| [ACh]Cl-Imidazole (1 : 2) | 323.15 | 331.6 | -4.57 | -3.72 | -4.50 | -4.58 |                               |

|                           |        |       |       |       |       |       |                                   |
|---------------------------|--------|-------|-------|-------|-------|-------|-----------------------------------|
| [ACh]Cl-Imidazole (1 : 2) | 323.15 | 424.1 | -4.33 | -3.47 | -4.25 | -4.33 |                                   |
| [ACh]Cl-Imidazole (1 : 2) | 323.15 | 526.8 | -4.10 | -3.26 | -4.03 | -4.11 |                                   |
| [ACh]Cl-Imidazole (1 : 2) | 323.15 | 587.1 | -4.01 | -3.15 | -3.91 | -3.99 |                                   |
| [ACh]Cl-Imidazole (1 : 2) | 333.15 | 30.6  | -7.01 | -6.29 | -7.01 | -6.80 |                                   |
| [ACh]Cl-Imidazole (1 : 2) | 333.15 | 60.2  | -6.38 | -5.62 | -6.33 | -6.39 |                                   |
| [ACh]Cl-Imidazole (1 : 2) | 333.15 | 99    | -5.91 | -5.12 | -5.83 | -5.97 |                                   |
| [ACh]Cl-Imidazole (1 : 2) | 333.15 | 148.6 | -5.55 | -4.72 | -5.42 | -5.56 |                                   |
| [ACh]Cl-Imidazole (1 : 2) | 333.15 | 235.9 | -5.08 | -4.26 | -4.95 | -5.07 |                                   |
| [ACh]Cl-Imidazole (1 : 2) | 333.15 | 339.2 | -4.72 | -3.90 | -4.58 | -4.70 |                                   |
| [ACh]Cl-Imidazole (1 : 2) | 333.15 | 429.2 | -4.49 | -3.66 | -4.33 | -4.46 |                                   |
| [ACh]Cl-Imidazole (1 : 2) | 333.15 | 536.5 | -4.27 | -3.44 | -4.10 | -4.23 |                                   |
| [ACh]Cl-Imidazole (1 : 2) | 333.15 | 589.9 | -4.17 | -3.35 | -4.00 | -4.13 |                                   |
| [Ch]Cl-Urea (1 : 2)       | 313.15 | 1130  | -2.56 | -2.74 | -3.56 | -2.91 | Li et al. (2008) <sup>3</sup>     |
| [Ch]Cl-Urea (1 : 2)       | 313.15 | 2850  | -1.90 | -1.96 | -2.61 | -2.24 |                                   |
| [Ch]Cl-Urea (1 : 2)       | 313.15 | 4370  | -1.66 | -1.61 | -2.10 | -1.92 |                                   |
| [Ch]Cl-Urea (1 : 2)       | 313.15 | 6230  | -1.46 | -1.30 | -1.61 | -1.55 |                                   |
| [Ch]Cl-Urea (1 : 2)       | 323.15 | 1010  | -2.81 | -3.05 | -3.77 | -3.16 |                                   |
| [Ch]Cl-Urea (1 : 2)       | 323.15 | 2240  | -2.23 | -2.35 | -2.95 | -2.54 |                                   |
| [Ch]Cl-Urea (1 : 2)       | 323.15 | 3170  | -2.03 | -2.06 | -2.56 | -2.31 |                                   |
| [Ch]Cl-Urea (1 : 2)       | 323.15 | 4740  | -1.71 | -1.72 | -2.06 | -1.99 |                                   |
| [Ch]Cl-Urea (1 : 2)       | 333.15 | 1000  | -2.98 | -3.27 | -3.88 | -3.31 |                                   |
| [Ch]Cl-Urea (1 : 2)       | 333.15 | 2360  | -2.31 | -2.49 | -2.97 | -2.63 |                                   |
| [Ch]Cl-Urea (1 : 2)       | 333.15 | 4800  | -1.86 | -1.88 | -2.11 | -2.10 |                                   |
| [Ch]Cl-Urea (1 : 2)       | 333.15 | 6310  | -1.62 | -1.64 | -1.72 | -1.80 |                                   |
| [BTEA]Cl-AC (1 : 2)       | 298.15 | 325   | -4.27 | -3.49 | -4.58 | -4.40 | Sarmad et al. (2017) <sup>6</sup> |
| [BTEA]Cl-AC (1 : 2)       | 298.15 | 551   | -3.55 | -2.97 | -4.03 | -3.82 |                                   |
| [BTEA]Cl-AC (1 : 2)       | 298.15 | 957   | -3.12 | -2.43 | -3.45 | -3.14 |                                   |

|                       |        |       |       |       |       |       |                                   |
|-----------------------|--------|-------|-------|-------|-------|-------|-----------------------------------|
| [BTEA]Cl-AC (1 : 2)   | 298.15 | 1377  | -2.78 | -2.07 | -3.05 | -2.70 |                                   |
| [BTEA]Cl-AC (1 : 2)   | 298.15 | 1664  | -2.52 | -1.88 | -2.83 | -2.50 |                                   |
| [BTEA]Cl-AC (1 : 2)   | 298.15 | 2054  | -2.32 | -1.67 | -2.58 | -2.31 |                                   |
| [BTMA]Cl-AC (1 : 2)   | 298.15 | 219   | -4.89 | -3.70 | -4.79 | -4.68 | Sarmad et al. (2017) <sup>6</sup> |
| [BTMA]Cl-AC (1 : 2)   | 298.15 | 530   | -3.66 | -2.83 | -3.90 | -3.71 |                                   |
| [BTMA]Cl-AC (1 : 2)   | 298.15 | 886   | -2.74 | -2.34 | -3.36 | -3.13 |                                   |
| [BTMA]Cl-AC (1 : 2)   | 298.15 | 1141  | -2.48 | -2.10 | -3.10 | -2.84 |                                   |
| [BTMA]Cl-AC (1 : 2)   | 298.15 | 1563  | -2.33 | -1.80 | -2.76 | -2.51 |                                   |
| [BTMA]Cl-AC (1 : 2)   | 298.15 | 1874  | -2.18 | -1.63 | -2.55 | -2.36 |                                   |
| [BTMA]Cl-AC (1 : 2)   | 298.15 | 2037  | -2.09 | -1.55 | -2.46 | -2.29 |                                   |
| [BTMA]Cl-GLY (1 : 2)  | 298.15 | 394   | -5.43 | -3.28 | -4.35 | -5.34 | Sarmad et al. (2017) <sup>6</sup> |
| [BTMA]Cl-GLY (1 : 2)  | 298.15 | 672   | -5.02 | -2.76 | -3.80 | -4.76 |                                   |
| [BTMA]Cl-GLY (1 : 2)  | 298.15 | 999   | -4.49 | -2.37 | -3.38 | -4.28 |                                   |
| [BTMA]Cl-GLY (1 : 2)  | 298.15 | 1345  | -3.88 | -2.08 | -3.06 | -3.93 |                                   |
| [BTMA]Cl-GLY (1 : 2)  | 298.15 | 1711  | -3.64 | -1.85 | -2.79 | -3.71 |                                   |
| [BTMA]Cl-GLY (1 : 2)  | 298.15 | 2026  | -3.51 | -1.68 | -2.60 | -3.58 |                                   |
| [Ch]Cl-Phenol (1 : 2) | 293.15 | 99    | -5.57 | -4.16 | -5.32 | -5.62 | Li et al. (2014) <sup>7</sup>     |
| [Ch]Cl-Phenol (1 : 2) | 293.15 | 197.2 | -4.87 | -3.46 | -4.62 | -4.91 |                                   |
| [Ch]Cl-Phenol (1 : 2) | 293.15 | 303.1 | -4.37 | -3.03 | -4.18 | -4.46 |                                   |
| [Ch]Cl-Phenol (1 : 2) | 293.15 | 397   | -4.12 | -2.76 | -3.90 | -4.17 |                                   |
| [Ch]Cl-Phenol (1 : 2) | 293.15 | 494.5 | -3.87 | -2.54 | -3.67 | -3.93 |                                   |
| [Ch]Cl-Phenol (1 : 2) | 303.15 | 104.3 | -5.60 | -4.35 | -5.39 | -5.73 |                                   |
| [Ch]Cl-Phenol (1 : 2) | 303.15 | 198.2 | -4.95 | -3.71 | -4.74 | -5.07 |                                   |
| [Ch]Cl-Phenol (1 : 2) | 303.15 | 295.5 | -4.56 | -3.31 | -4.33 | -4.65 |                                   |
| [Ch]Cl-Phenol (1 : 2) | 303.15 | 400.6 | -4.29 | -3.00 | -4.01 | -4.33 |                                   |
| [Ch]Cl-Phenol (1 : 2) | 303.15 | 510.1 | -4.07 | -2.76 | -3.76 | -4.06 |                                   |
| [Ch]Cl-Phenol (1 : 2) | 313.15 | 121.8 | -5.71 | -4.43 | -5.35 | -5.74 |                                   |

|                       |        |       |       |       |       |       |                                      |
|-----------------------|--------|-------|-------|-------|-------|-------|--------------------------------------|
| [Ch]Cl-Phenol (1 : 2) | 313.15 | 217.8 | -5.12 | -3.84 | -4.75 | -5.13 |                                      |
| [Ch]Cl-Phenol (1 : 2) | 313.15 | 322   | -4.70 | -3.45 | -4.35 | -4.72 |                                      |
| [Ch]Cl-Phenol (1 : 2) | 313.15 | 417.4 | -4.41 | -3.19 | -4.08 | -4.45 |                                      |
| [Ch]Cl-Phenol (1 : 2) | 313.15 | 503   | -4.21 | -3.00 | -3.88 | -4.24 |                                      |
| [Ch]Cl-Phenol (1 : 2) | 323.15 | 115.2 | -6.03 | -4.69 | -5.50 | -5.94 |                                      |
| [Ch]Cl-Phenol (1 : 2) | 323.15 | 216.5 | -5.34 | -4.06 | -4.86 | -5.29 |                                      |
| [Ch]Cl-Phenol (1 : 2) | 323.15 | 320   | -4.98 | -3.67 | -4.46 | -4.88 |                                      |
| [Ch]Cl-Phenol (1 : 2) | 323.15 | 424.8 | -4.68 | -3.38 | -4.16 | -4.58 |                                      |
| [TBA]Br-AC (1 : 2)    | 298.15 | 388   | -3.91 | -2.64 | -3.71 | -3.52 | Sarmad et al.<br>(2017) <sup>6</sup> |
| [TBA]Br-AC (1 : 2)    | 298.15 | 715   | -2.93 | -2.09 | -3.14 | -2.84 |                                      |
| [TBA]Br-AC (1 : 2)    | 298.15 | 1302  | -2.41 | -1.60 | -2.58 | -2.11 |                                      |
| [TBA]Br-AC (1 : 2)    | 298.15 | 1730  | -2.15 | -1.38 | -2.32 | -1.82 |                                      |
| [TBA]Br-AC (1 : 2)    | 298.15 | 2011  | -1.94 | -1.27 | -2.18 | -1.69 |                                      |
| [TBA]Cl-AC (1 : 2)    | 298.15 | 348   | -3.73 | -2.83 | -3.91 | -3.66 | Sarmad et al.<br>(2017) <sup>6</sup> |
| [TBA]Cl-AC (1 : 2)    | 298.15 | 631   | -3.00 | -2.28 | -3.33 | -3.04 |                                      |
| [TBA]Cl-AC (1 : 2)    | 298.15 | 943   | -2.59 | -1.92 | -2.94 | -2.58 |                                      |
| [TBA]Cl-AC (1 : 2)    | 298.15 | 1319  | -2.26 | -1.63 | -2.62 | -2.21 |                                      |
| [TBA]Cl-AC (1 : 2)    | 298.15 | 1673  | -1.99 | -1.44 | -2.39 | -1.98 |                                      |
| [TBA]Cl-AC (1 : 2)    | 298.15 | 2002  | -1.84 | -1.30 | -2.21 | -1.83 |                                      |
| [TEA]Cl-AC (1 : 2)    | 298.15 | 281   | -3.65 | -3.22 | -4.31 | -4.04 | Sarmad et al.<br>(2017) <sup>6</sup> |
| [TEA]Cl-AC (1 : 2)    | 298.15 | 530   | -3.04 | -2.62 | -3.68 | -3.34 |                                      |
| [TEA]Cl-AC (1 : 2)    | 298.15 | 822   | -2.62 | -2.22 | -3.25 | -2.82 |                                      |
| [TEA]Cl-AC (1 : 2)    | 298.15 | 1304  | -2.20 | -1.81 | -2.79 | -2.26 |                                      |
| [TEA]Cl-AC (1 : 2)    | 298.15 | 1699  | -1.97 | -1.58 | -2.53 | -1.98 |                                      |
| [TEA]Cl-AC (1 : 2)    | 298.15 | 2018  | -1.82 | -1.44 | -2.35 | -1.83 |                                      |
| [TBA]Cl-LA (1 : 2)    | 308    | 93    | -5.18 | -4.60 | -5.58 | -4.97 | Zubeir et al.<br>(2014) <sup>8</sup> |

|                    |     |      |       |       |       |       |                                      |
|--------------------|-----|------|-------|-------|-------|-------|--------------------------------------|
| [TBA]CI-LA (1 : 2) | 308 | 194  | -4.35 | -3.87 | -4.84 | -4.24 |                                      |
| [TBA]CI-LA (1 : 2) | 308 | 293  | -3.91 | -3.46 | -4.43 | -3.83 |                                      |
| [TBA]CI-LA (1 : 2) | 308 | 392  | -3.62 | -3.18 | -4.13 | -3.55 |                                      |
| [TBA]CI-LA (1 : 2) | 308 | 493  | -3.41 | -2.96 | -3.90 | -3.33 |                                      |
| [TBA]CI-LA (1 : 2) | 308 | 793  | -2.93 | -2.50 | -3.42 | -2.84 |                                      |
| [TBA]CI-LA (1 : 2) | 308 | 892  | -2.82 | -2.39 | -3.30 | -2.72 |                                      |
| [TBA]CI-LA (1 : 2) | 308 | 993  | -2.71 | -2.29 | -3.19 | -2.60 |                                      |
| [TBA]CI-LA (1 : 2) | 308 | 1292 | -2.46 | -2.05 | -2.91 | -2.34 |                                      |
| [TBA]CI-LA (1 : 2) | 308 | 1393 | -2.40 | -1.98 | -2.83 | -2.27 |                                      |
| [TBA]CI-LA (1 : 2) | 308 | 1493 | -2.32 | -1.92 | -2.76 | -2.21 |                                      |
| [TBA]CI-LA (1 : 2) | 308 | 1793 | -2.15 | -1.75 | -2.57 | -2.06 |                                      |
| [TBA]CI-LA (1 : 2) | 308 | 1893 | -2.11 | -1.71 | -2.51 | -2.02 |                                      |
| [TBA]CI-LA (1 : 2) | 308 | 1992 | -2.06 | -1.66 | -2.45 | -1.99 |                                      |
| [TBA]CI-LA (1 : 2) | 318 | 93   | -5.15 | -4.80 | -5.67 | -5.17 |                                      |
| [TBA]CI-LA (1 : 2) | 318 | 194  | -4.45 | -4.07 | -4.93 | -4.44 |                                      |
| [TBA]CI-LA (1 : 2) | 318 | 293  | -4.08 | -3.67 | -4.52 | -4.03 |                                      |
| [TBA]CI-LA (1 : 2) | 318 | 393  | -3.77 | -3.38 | -4.22 | -3.75 |                                      |
| [TBA]CI-LA (1 : 2) | 318 | 492  | -3.54 | -3.16 | -3.99 | -3.53 |                                      |
| [TBA]CI-LA (1 : 2) | 318 | 793  | -3.07 | -2.70 | -3.50 | -3.04 |                                      |
| [TBA]CI-LA (1 : 2) | 318 | 893  | -2.95 | -2.59 | -3.37 | -2.91 |                                      |
| [TBA]CI-LA (1 : 2) | 318 | 992  | -2.85 | -2.49 | -3.26 | -2.80 |                                      |
| [TBA]CI-LA (1 : 2) | 318 | 1292 | -2.60 | -2.24 | -2.99 | -2.53 |                                      |
| [TBA]CI-LA (1 : 2) | 318 | 1393 | -2.54 | -2.17 | -2.91 | -2.46 |                                      |
| [TBA]CI-LA (1 : 2) | 318 | 1493 | -2.47 | -2.11 | -2.83 | -2.39 |                                      |
| [TBA]CI-LA (1 : 2) | 318 | 1793 | -2.30 | -1.94 | -2.63 | -2.25 |                                      |
| [TBA]CI-LA (1 : 2) | 318 | 1892 | -2.25 | -1.89 | -2.58 | -2.21 |                                      |
| [TBA]CI-LA (1 : 2) | 318 | 1992 | -2.20 | -1.84 | -2.52 | -2.17 |                                      |
| [TEA]CI-LA (1 : 2) | 308 | 97   | -5.78 | -4.84 | -5.83 | -5.73 | Zubeir et al.<br>(2014) <sup>8</sup> |

|                    |     |      |       |       |       |       |  |
|--------------------|-----|------|-------|-------|-------|-------|--|
| [TEA]CI-LA (1 : 2) | 308 | 197  | -4.94 | -4.14 | -5.11 | -4.96 |  |
| [TEA]CI-LA (1 : 2) | 308 | 294  | -4.49 | -3.74 | -4.71 | -4.53 |  |
| [TEA]CI-LA (1 : 2) | 308 | 394  | -4.19 | -3.46 | -4.41 | -4.23 |  |
| [TEA]CI-LA (1 : 2) | 308 | 493  | -3.96 | -3.24 | -4.18 | -4.01 |  |
| [TEA]CI-LA (1 : 2) | 308 | 593  | -3.78 | -3.06 | -3.99 | -3.82 |  |
| [TEA]CI-LA (1 : 2) | 308 | 693  | -3.62 | -2.90 | -3.83 | -3.65 |  |
| [TEA]CI-LA (1 : 2) | 308 | 793  | -3.49 | -2.77 | -3.69 | -3.50 |  |
| [TEA]CI-LA (1 : 2) | 308 | 893  | -3.36 | -2.66 | -3.56 | -3.37 |  |
| [TEA]CI-LA (1 : 2) | 308 | 993  | -3.27 | -2.55 | -3.45 | -3.25 |  |
| [TEA]CI-LA (1 : 2) | 308 | 1093 | -3.19 | -2.46 | -3.35 | -3.15 |  |
| [TEA]CI-LA (1 : 2) | 308 | 1192 | -3.10 | -2.38 | -3.25 | -3.06 |  |
| [TEA]CI-LA (1 : 2) | 308 | 1293 | -3.03 | -2.30 | -3.16 | -2.98 |  |
| [TEA]CI-LA (1 : 2) | 308 | 1392 | -2.96 | -2.23 | -3.08 | -2.91 |  |
| [TEA]CI-LA (1 : 2) | 308 | 1493 | -2.89 | -2.16 | -3.01 | -2.84 |  |
| [TEA]CI-LA (1 : 2) | 308 | 1592 | -2.83 | -2.10 | -2.93 | -2.79 |  |
| [TEA]CI-LA (1 : 2) | 308 | 1692 | -2.77 | -2.04 | -2.87 | -2.74 |  |
| [TEA]CI-LA (1 : 2) | 308 | 1793 | -2.72 | -1.99 | -2.80 | -2.70 |  |
| [TEA]CI-LA (1 : 2) | 308 | 1893 | -2.67 | -1.94 | -2.74 | -2.66 |  |
| [TEA]CI-LA (1 : 2) | 308 | 1993 | -2.62 | -1.89 | -2.68 | -2.62 |  |
| [TEA]CI-LA (1 : 2) | 318 | 94   | -5.56 | -5.09 | -5.95 | -5.96 |  |
| [TEA]CI-LA (1 : 2) | 318 | 193  | -5.04 | -4.37 | -5.23 | -5.19 |  |
| [TEA]CI-LA (1 : 2) | 318 | 294  | -4.57 | -3.95 | -4.80 | -4.73 |  |
| [TEA]CI-LA (1 : 2) | 318 | 393  | -4.35 | -3.67 | -4.50 | -4.44 |  |
| [TEA]CI-LA (1 : 2) | 318 | 492  | -4.10 | -3.44 | -4.27 | -4.21 |  |
| [TEA]CI-LA (1 : 2) | 318 | 593  | -3.93 | -3.26 | -4.08 | -4.02 |  |
| [TEA]CI-LA (1 : 2) | 318 | 692  | -3.78 | -3.11 | -3.92 | -3.85 |  |
| [TEA]CI-LA (1 : 2) | 318 | 793  | -3.65 | -2.98 | -3.77 | -3.70 |  |
| [TEA]CI-LA (1 : 2) | 318 | 892  | -3.53 | -2.86 | -3.65 | -3.57 |  |

|                    |     |      |       |       |       |       |                                      |
|--------------------|-----|------|-------|-------|-------|-------|--------------------------------------|
| [TEA]Cl-LA (1 : 2) | 318 | 993  | -3.43 | -2.76 | -3.53 | -3.45 |                                      |
| [TEA]Cl-LA (1 : 2) | 318 | 1092 | -3.34 | -2.66 | -3.43 | -3.34 |                                      |
| [TEA]Cl-LA (1 : 2) | 318 | 1193 | -3.26 | -2.58 | -3.34 | -3.25 |                                      |
| [TEA]Cl-LA (1 : 2) | 318 | 1293 | -3.19 | -2.50 | -3.25 | -3.17 |                                      |
| [TEA]Cl-LA (1 : 2) | 318 | 1392 | -3.13 | -2.43 | -3.17 | -3.10 |                                      |
| [TEA]Cl-LA (1 : 2) | 318 | 1492 | -3.06 | -2.36 | -3.09 | -3.03 |                                      |
| [TEA]Cl-LA (1 : 2) | 318 | 1593 | -2.99 | -2.30 | -3.02 | -2.98 |                                      |
| [TEA]Cl-LA (1 : 2) | 318 | 1693 | -2.95 | -2.24 | -2.95 | -2.93 |                                      |
| [TEA]Cl-LA (1 : 2) | 318 | 1793 | -2.89 | -2.19 | -2.88 | -2.88 |                                      |
| [TEA]Cl-LA (1 : 2) | 318 | 1892 | -2.84 | -2.13 | -2.82 | -2.84 |                                      |
| [TEA]Cl-LA (1 : 2) | 318 | 1992 | -2.79 | -2.09 | -2.76 | -2.81 |                                      |
| [TMA]Cl-LA (1 : 2) | 308 | 98   | -6.01 | -5.24 | -6.23 | -5.89 | Zubeir et al.<br>(2014) <sup>8</sup> |
| [TMA]Cl-LA (1 : 2) | 308 | 194  | -5.17 | -4.56 | -5.53 | -5.14 |                                      |
| [TMA]Cl-LA (1 : 2) | 308 | 295  | -4.75 | -4.14 | -5.10 | -4.69 |                                      |
| [TMA]Cl-LA (1 : 2) | 308 | 393  | -4.42 | -3.85 | -4.81 | -4.40 |                                      |
| [TMA]Cl-LA (1 : 2) | 308 | 493  | -4.20 | -3.63 | -4.57 | -4.18 |                                      |
| [TMA]Cl-LA (1 : 2) | 308 | 592  | -4.00 | -3.44 | -4.38 | -4.00 |                                      |
| [TMA]Cl-LA (1 : 2) | 308 | 692  | -3.84 | -3.29 | -4.21 | -3.84 |                                      |
| [TMA]Cl-LA (1 : 2) | 308 | 793  | -3.70 | -3.15 | -4.06 | -3.70 |                                      |
| [TMA]Cl-LA (1 : 2) | 308 | 893  | -3.59 | -3.03 | -3.93 | -3.58 |                                      |
| [TMA]Cl-LA (1 : 2) | 308 | 993  | -3.48 | -2.92 | -3.81 | -3.47 |                                      |
| [TMA]Cl-LA (1 : 2) | 308 | 1093 | -3.38 | -2.83 | -3.71 | -3.37 |                                      |
| [TMA]Cl-LA (1 : 2) | 308 | 1192 | -3.30 | -2.74 | -3.61 | -3.28 |                                      |
| [TMA]Cl-LA (1 : 2) | 308 | 1292 | -3.23 | -2.66 | -3.52 | -3.21 |                                      |
| [TMA]Cl-LA (1 : 2) | 308 | 1392 | -3.17 | -2.58 | -3.43 | -3.14 |                                      |
| [TMA]Cl-LA (1 : 2) | 308 | 1492 | -3.11 | -2.51 | -3.35 | -3.08 |                                      |
| [TMA]Cl-LA (1 : 2) | 308 | 1593 | -3.03 | -2.44 | -3.27 | -3.02 |                                      |
| [TMA]Cl-LA (1 : 2) | 308 | 1692 | -2.98 | -2.38 | -3.20 | -2.98 |                                      |

|                     |        |      |       |       |       |       |                                      |
|---------------------|--------|------|-------|-------|-------|-------|--------------------------------------|
| [TMA]Cl-LA (1 : 2)  | 308    | 1793 | -2.93 | -2.32 | -3.13 | -2.93 |                                      |
| [TMA]Cl-LA (1 : 2)  | 308    | 1892 | -2.88 | -2.26 | -3.07 | -2.89 |                                      |
| [TMA]Cl-LA (1 : 2)  | 308    | 1992 | -2.83 | -2.21 | -3.00 | -2.86 |                                      |
| [TMA]Cl-LA (1 : 2)  | 318    | 95   | -6.07 | -5.48 | -6.34 | -6.09 |                                      |
| [TMA]Cl-LA (1 : 2)  | 318    | 194  | -5.24 | -4.76 | -5.62 | -5.31 |                                      |
| [TMA]Cl-LA (1 : 2)  | 318    | 293  | -4.82 | -4.35 | -5.20 | -4.86 |                                      |
| [TMA]Cl-LA (1 : 2)  | 318    | 393  | -4.56 | -4.05 | -4.89 | -4.57 |                                      |
| [TMA]Cl-LA (1 : 2)  | 318    | 493  | -4.32 | -3.83 | -4.65 | -4.35 |                                      |
| [TMA]Cl-LA (1 : 2)  | 318    | 593  | -4.15 | -3.64 | -4.46 | -4.16 |                                      |
| [TMA]Cl-LA (1 : 2)  | 318    | 692  | -3.97 | -3.49 | -4.29 | -4.00 |                                      |
| [TMA]Cl-LA (1 : 2)  | 318    | 792  | -3.85 | -3.35 | -4.15 | -3.86 |                                      |
| [TMA]Cl-LA (1 : 2)  | 318    | 893  | -3.73 | -3.23 | -4.02 | -3.73 |                                      |
| [TMA]Cl-LA (1 : 2)  | 318    | 992  | -3.63 | -3.12 | -3.90 | -3.62 |                                      |
| [TMA]Cl-LA (1 : 2)  | 318    | 1093 | -3.54 | -3.03 | -3.79 | -3.52 |                                      |
| [TMA]Cl-LA (1 : 2)  | 318    | 1193 | -3.45 | -2.94 | -3.70 | -3.44 |                                      |
| [TMA]Cl-LA (1 : 2)  | 318    | 1292 | -3.38 | -2.86 | -3.60 | -3.36 |                                      |
| [TMA]Cl-LA (1 : 2)  | 318    | 1393 | -3.31 | -2.78 | -3.52 | -3.29 |                                      |
| [TMA]Cl-LA (1 : 2)  | 318    | 1493 | -3.25 | -2.71 | -3.44 | -3.23 |                                      |
| [TMA]Cl-LA (1 : 2)  | 318    | 1593 | -3.19 | -2.64 | -3.36 | -3.17 |                                      |
| [TMA]Cl-LA (1 : 2)  | 318    | 1692 | -3.13 | -2.58 | -3.29 | -3.12 |                                      |
| [TMA]Cl-LA (1 : 2)  | 318    | 1792 | -3.09 | -2.52 | -3.22 | -3.08 |                                      |
| [TMA]Cl-LA (1 : 2)  | 318    | 1892 | -3.04 | -2.47 | -3.16 | -3.04 |                                      |
| [TMA]Cl-LA (1 : 2)  | 318    | 1993 | -2.99 | -2.42 | -3.09 | -3.00 |                                      |
| [TEMA]Cl-AC (1 : 2) | 298.15 | 198  | -5.03 | -3.65 | -4.74 | -4.86 | Sarmad et al.<br>(2017) <sup>6</sup> |
| [TEMA]Cl-AC (1 : 2) | 298.15 | 413  | -4.18 | -2.94 | -4.01 | -4.01 |                                      |
| [TEMA]Cl-AC (1 : 2) | 298.15 | 806  | -3.41 | -2.31 | -3.34 | -3.28 |                                      |
| [TEMA]Cl-AC (1 : 2) | 298.15 | 1155 | -3.05 | -1.98 | -2.98 | -2.87 |                                      |
| [TEMA]Cl-AC (1 : 2) | 298.15 | 1410 | -2.78 | -1.80 | -2.78 | -2.66 |                                      |



|                      |        |      |       |       |       |       |                                      |
|----------------------|--------|------|-------|-------|-------|-------|--------------------------------------|
| [TEMA]CI-AC (1 : 2)  | 298.15 | 1624 | -2.60 | -1.68 | -2.63 | -2.52 |                                      |
| [TEMA]CI-AC (1 : 2)  | 298.15 | 1837 | -2.44 | -1.57 | -2.50 | -2.41 |                                      |
| [TEMA]CI-EG (1 : 2)  | 298.15 | 138  | -5.28 | -4.13 | -5.23 | -5.85 |                                      |
| [TEMA]CI-EG (1 : 2)  | 298.15 | 314  | -4.12 | -3.33 | -4.41 | -4.81 |                                      |
| [TEMA]CI-EG (1 : 2)  | 298.15 | 543  | -3.49 | -2.80 | -3.86 | -4.22 |                                      |
| [TEMA]CI-EG (1 : 2)  | 298.15 | 802  | -3.28 | -2.44 | -3.47 | -3.79 |                                      |
| [TEMA]CI-EG (1 : 2)  | 298.15 | 1041 | -3.09 | -2.20 | -3.20 | -3.49 |                                      |
| [TEMA]CI-EG (1 : 2)  | 298.15 | 1345 | -3.01 | -1.96 | -2.94 | -3.22 |                                      |
| [TEMA]CI-GLY (1 : 2) | 298.15 | 150  | -6.35 | -4.14 | -5.24 | -5.86 | Sarmad et al.<br>(2017) <sup>6</sup> |
| [TEMA]CI-GLY (1 : 2) | 298.15 | 420  | -5.11 | -3.13 | -4.20 | -4.65 |                                      |
| [TEMA]CI-GLY (1 : 2) | 298.15 | 833  | -4.36 | -2.47 | -3.50 | -3.85 |                                      |
| [TEMA]CI-GLY (1 : 2) | 298.15 | 1238 | -3.64 | -2.09 | -3.08 | -3.36 |                                      |
| [TEMA]CI-GLY (1 : 2) | 298.15 | 1648 | -3.16 | -1.83 | -2.78 | -3.05 |                                      |
| [TEMA]CI-LA (1 : 2)  | 298.15 | 143  | -5.35 | -4.32 | -5.42 | -5.13 | Sarmad et al.<br>(2017) <sup>6</sup> |
| [TEMA]CI-LA (1 : 2)  | 298.15 | 418  | -4.52 | -3.26 | -4.33 | -3.96 |                                      |
| [TEMA]CI-LA (1 : 2)  | 298.15 | 938  | -3.64 | -2.47 | -3.49 | -3.13 |                                      |
| [TEMA]CI-LA (1 : 2)  | 298.15 | 1265 | -3.32 | -2.18 | -3.16 | -2.83 |                                      |
| [TEMA]CI-LA (1 : 2)  | 298.15 | 1500 | -3.13 | -2.01 | -2.98 | -2.68 |                                      |
| [TEMA]CI-LA (1 : 2)  | 298.15 | 1863 | -2.97 | -1.80 | -2.73 | -2.50 |                                      |
| [TEMA]CI-LEV (1 : 2) | 298.15 | 136  | -5.00 | -3.76 | -4.86 | -4.96 | Sarmad et al.<br>(2017) <sup>6</sup> |
| [TEMA]CI-LEV (1 : 2) | 298.15 | 409  | -3.97 | -2.68 | -3.76 | -3.77 |                                      |
| [TEMA]CI-LEV (1 : 2) | 298.15 | 735  | -3.34 | -2.13 | -3.17 | -3.03 |                                      |
| [TEMA]CI-LEV (1 : 2) | 298.15 | 1043 | -3.01 | -1.81 | -2.82 | -2.51 |                                      |
| [TEMA]CI-LEV (1 : 2) | 298.15 | 1617 | -2.69 | -1.41 | -2.37 | -1.88 |                                      |
| [Gua]CI-EA (1 : 2)   | 298.15 | 226  | -3.83 | -4.01 | -5.10 | -3.86 | Sarmad et al.<br>(2017) <sup>6</sup> |
| [Gua]CI-EA (1 : 2)   | 298.15 | 563  | -2.87 | -3.08 | -4.13 | -3.01 |                                      |

|                      |        |      |       |       |       |       |                                      |
|----------------------|--------|------|-------|-------|-------|-------|--------------------------------------|
| [Gua]Cl-EA (1 : 2)   | 298.15 | 836  | -2.54 | -2.66 | -3.70 | -2.72 |                                      |
| [Gua]Cl-EA (1 : 2)   | 298.15 | 1129 | -2.41 | -2.35 | -3.35 | -2.51 |                                      |
| [Gua]Cl-EA (1 : 2)   | 298.15 | 1480 | -2.36 | -2.05 | -3.01 | -2.33 |                                      |
| [Gua]Cl-EA (1 : 2)   | 298.15 | 1787 | -2.30 | -1.83 | -2.77 | -2.22 |                                      |
| [Gua]Cl-EA (1 : 2)   | 298.15 | 2025 | -2.23 | -1.68 | -2.59 | -2.14 |                                      |
| [Ch]Cl-EA (1 : 2)    | 308.2  | 651  | -3.00 | -2.68 | -3.61 | -3.31 | Sarmad et al.<br>(2017) <sup>6</sup> |
| [Ch]Cl-EA (1 : 2)    | 308.2  | 1527 | -2.35 | -1.85 | -2.69 | -2.32 |                                      |
| [Ch]Cl-EA (1 : 2)    | 308.2  | 2453 | -1.99 | -1.38 | -2.12 | -1.93 |                                      |
| [Ch]Cl-EA (1 : 2)    | 308.2  | 3445 | -1.75 | -1.01 | -1.66 | -1.69 |                                      |
| [Ch]Cl-EA (1 : 2)    | 308.2  | 4376 | -1.63 | -0.87 | -1.42 | -1.48 |                                      |
| [Ch]Cl-EA (1 : 2)    | 318.2  | 706  | -3.12 | -2.81 | -3.61 | -3.37 |                                      |
| [Ch]Cl-EA (1 : 2)    | 318.2  | 1661 | -2.39 | -1.97 | -2.68 | -2.39 |                                      |
| [Ch]Cl-EA (1 : 2)    | 318.2  | 2618 | -2.06 | -1.52 | -2.13 | -2.02 |                                      |
| [Ch]Cl-EA (1 : 2)    | 318.2  | 3527 | -1.78 | -1.21 | -1.73 | -1.80 |                                      |
| [Ch]Cl-EA (1 : 2)    | 318.2  | 4504 | -1.67 | -0.92 | -1.35 | -1.57 |                                      |
| [Ch]Cl-EA (1 : 2)    | 328.2  | 692  | -3.17 | -3.02 | -3.71 | -3.54 |                                      |
| [Ch]Cl-EA (1 : 2)    | 328.2  | 1691 | -2.43 | -2.14 | -2.74 | -2.50 |                                      |
| [Ch]Cl-EA (1 : 2)    | 328.2  | 2544 | -2.14 | -1.74 | -2.24 | -2.17 |                                      |
| [Ch]Cl-EA (1 : 2)    | 328.2  | 3577 | -1.86 | -1.39 | -1.79 | -1.90 |                                      |
| [Ch]Cl-EA (1 : 2)    | 328.2  | 4499 | -1.74 | -1.14 | -1.45 | -1.68 |                                      |
| [TBA]Cl-DecA (1 : 2) | 298.15 | 90   | -4.39 | -3.80 | -4.91 | -4.47 | Zubeir et al.<br>(2018) <sup>4</sup> |
| [TBA]Cl-DecA (1 : 2) | 298.15 | 190  | -3.66 | -3.07 | -4.17 | -3.70 |                                      |
| [TBA]Cl-DecA (1 : 2) | 298.15 | 290  | -3.25 | -2.66 | -3.75 | -3.26 |                                      |
| [TBA]Cl-DecA (1 : 2) | 298.15 | 390  | -2.95 | -2.38 | -3.46 | -2.97 |                                      |
| [TBA]Cl-DecA (1 : 2) | 298.15 | 490  | -2.73 | -2.17 | -3.24 | -2.76 |                                      |
| [TBA]Cl-DecA (1 : 2) | 298.15 | 690  | -2.40 | -1.86 | -2.90 | -2.42 |                                      |
| [TBA]Cl-DecA (1 : 2) | 298.15 | 790  | -2.28 | -1.74 | -2.77 | -2.28 |                                      |

|                      |        |      |       |       |       |       |  |
|----------------------|--------|------|-------|-------|-------|-------|--|
| [TBA]Cl-DecA (1 : 2) | 298.15 | 990  | -2.07 | -1.54 | -2.55 | -2.05 |  |
| [TBA]Cl-DecA (1 : 2) | 298.15 | 1190 | -1.90 | -1.38 | -2.38 | -1.87 |  |
| [TBA]Cl-DecA (1 : 2) | 298.15 | 1490 | -1.69 | -1.19 | -2.16 | -1.67 |  |
| [TBA]Cl-DecA (1 : 2) | 298.15 | 1790 | -1.52 | -1.04 | -1.97 | -1.52 |  |
| [TBA]Cl-DecA (1 : 2) | 298.15 | 1990 | -1.43 | -0.88 | -1.79 | -1.44 |  |
| [TBA]Cl-DecA (1 : 2) | 308.15 | 90   | -4.60 | -4.03 | -5.01 | -4.61 |  |
| [TBA]Cl-DecA (1 : 2) | 308.15 | 190  | -3.83 | -3.29 | -4.27 | -3.84 |  |
| [TBA]Cl-DecA (1 : 2) | 308.15 | 290  | -3.40 | -2.88 | -3.85 | -3.40 |  |
| [TBA]Cl-DecA (1 : 2) | 308.15 | 390  | -3.11 | -2.60 | -3.55 | -3.12 |  |
| [TBA]Cl-DecA (1 : 2) | 308.15 | 490  | -2.89 | -2.38 | -3.32 | -2.90 |  |
| [TBA]Cl-DecA (1 : 2) | 308.15 | 690  | -2.55 | -2.06 | -2.99 | -2.56 |  |
| [TBA]Cl-DecA (1 : 2) | 308.15 | 790  | -2.42 | -1.94 | -2.85 | -2.42 |  |
| [TBA]Cl-DecA (1 : 2) | 308.15 | 990  | -2.21 | -1.74 | -2.63 | -2.18 |  |
| [TBA]Cl-DecA (1 : 2) | 308.15 | 1190 | -2.04 | -1.58 | -2.45 | -2.00 |  |
| [TBA]Cl-DecA (1 : 2) | 308.15 | 1490 | -1.83 | -1.38 | -2.22 | -1.79 |  |
| [TBA]Cl-DecA (1 : 2) | 308.15 | 1790 | -1.66 | -1.23 | -2.04 | -1.64 |  |
| [TBA]Cl-DecA (1 : 2) | 308.15 | 1990 | -1.57 | -1.14 | -1.93 | -1.56 |  |
| [TBA]Cl-DecA (1 : 2) | 323.15 | 90   | -4.76 | -4.34 | -5.15 | -4.82 |  |
| [TBA]Cl-DecA (1 : 2) | 323.15 | 190  | -4.03 | -3.60 | -4.40 | -4.06 |  |
| [TBA]Cl-DecA (1 : 2) | 323.15 | 290  | -3.61 | -3.18 | -3.98 | -3.62 |  |
| [TBA]Cl-DecA (1 : 2) | 323.15 | 390  | -3.31 | -2.90 | -3.68 | -3.33 |  |
| [TBA]Cl-DecA (1 : 2) | 323.15 | 490  | -3.08 | -2.68 | -3.45 | -3.11 |  |
| [TBA]Cl-DecA (1 : 2) | 323.15 | 690  | -2.75 | -2.35 | -3.10 | -2.77 |  |
| [TBA]Cl-DecA (1 : 2) | 323.15 | 790  | -2.63 | -2.22 | -2.97 | -2.62 |  |
| [TBA]Cl-DecA (1 : 2) | 323.15 | 990  | -2.41 | -2.02 | -2.74 | -2.38 |  |
| [TBA]Cl-DecA (1 : 2) | 323.15 | 1190 | -2.23 | -1.85 | -2.55 | -2.19 |  |
| [TBA]Cl-DecA (1 : 2) | 323.15 | 1490 | -2.02 | -1.65 | -2.32 | -1.98 |  |
| [TBA]Cl-DecA (1 : 2) | 323.15 | 1790 | -1.86 | -1.49 | -2.13 | -1.83 |  |

|                       |        |      |       |       |       |       |                                      |
|-----------------------|--------|------|-------|-------|-------|-------|--------------------------------------|
| [TBA]Cl-DecA (1 : 2)  | 323.15 | 1990 | -1.76 | -1.39 | -2.01 | -1.74 |                                      |
| [TOMA]Cl-DecA (1 : 2) | 298.15 | 90   | -4.32 | -3.78 | -4.89 | -4.32 | Zubeir et al.<br>(2018) <sup>4</sup> |
| [TOMA]Cl-DecA (1 : 2) | 298.15 | 190  | -3.54 | -3.05 | -4.15 | -3.49 |                                      |
| [TOMA]Cl-DecA (1 : 2) | 298.15 | 290  | -3.19 | -2.64 | -3.73 | -3.05 |                                      |
| [TOMA]Cl-DecA (1 : 2) | 298.15 | 390  | -2.88 | -2.36 | -3.44 | -2.78 |                                      |
| [TOMA]Cl-DecA (1 : 2) | 298.15 | 490  | -2.67 | -2.15 | -3.21 | -2.58 |                                      |
| [TOMA]Cl-DecA (1 : 2) | 298.15 | 790  | -2.21 | -1.72 | -2.75 | -2.19 |                                      |
| [TOMA]Cl-DecA (1 : 2) | 298.15 | 990  | -2.00 | -1.52 | -2.53 | -2.01 |                                      |
| [TOMA]Cl-DecA (1 : 2) | 298.15 | 1490 | -1.63 | -1.17 | -2.14 | -1.70 |                                      |
| [TOMA]Cl-DecA (1 : 2) | 298.15 | 1990 | -1.38 | -0.86 | -1.77 | -1.52 |                                      |
| [TOMA]Cl-DecA (1 : 2) | 308.15 | 90   | -4.49 | -4.01 | -4.99 | -4.46 |                                      |
| [TOMA]Cl-DecA (1 : 2) | 308.15 | 190  | -3.73 | -3.27 | -4.24 | -3.65 |                                      |
| [TOMA]Cl-DecA (1 : 2) | 308.15 | 290  | -3.32 | -2.86 | -3.82 | -3.20 |                                      |
| [TOMA]Cl-DecA (1 : 2) | 308.15 | 390  | -3.04 | -2.58 | -3.53 | -2.93 |                                      |
| [TOMA]Cl-DecA (1 : 2) | 308.15 | 490  | -2.82 | -2.36 | -3.30 | -2.73 |                                      |
| [TOMA]Cl-DecA (1 : 2) | 308.15 | 790  | -2.34 | -1.92 | -2.83 | -2.34 |                                      |
| [TOMA]Cl-DecA (1 : 2) | 308.15 | 990  | -2.14 | -1.71 | -2.61 | -2.15 |                                      |
| [TOMA]Cl-DecA (1 : 2) | 308.15 | 1490 | -1.76 | -1.36 | -2.20 | -1.84 |                                      |
| [TOMA]Cl-DecA (1 : 2) | 308.15 | 1990 | -1.50 | -1.12 | -1.91 | -1.65 |                                      |
| [TOMA]Br-DecA (1 : 2) | 298.15 | 90   | -4.27 | -3.68 | -4.78 | -4.27 | Zubeir et al.<br>(2018) <sup>4</sup> |
| [TOMA]Br-DecA (1 : 2) | 298.15 | 190  | -3.59 | -2.95 | -4.05 | -3.50 |                                      |
| [TOMA]Br-DecA (1 : 2) | 298.15 | 290  | -3.19 | -2.55 | -3.64 | -3.07 |                                      |
| [TOMA]Br-DecA (1 : 2) | 298.15 | 390  | -2.90 | -2.28 | -3.35 | -2.79 |                                      |
| [TOMA]Br-DecA (1 : 2) | 298.15 | 490  | -2.66 | -2.07 | -3.14 | -2.58 |                                      |
| [TOMA]Br-DecA (1 : 2) | 298.15 | 790  | -2.21 | -1.65 | -2.69 | -2.15 |                                      |
| [TOMA]Br-DecA (1 : 2) | 298.15 | 990  | -1.99 | -1.47 | -2.48 | -1.94 |                                      |
| [TOMA]Br-DecA (1 : 2) | 298.15 | 1490 | -1.62 | -1.14 | -2.11 | -1.59 |                                      |

|                       |        |        |       |       |       |       |                                      |
|-----------------------|--------|--------|-------|-------|-------|-------|--------------------------------------|
| [TOMA]Br-DecA (1 : 2) | 298.15 | 1990   | -1.36 | -0.80 | -1.72 | -1.39 |                                      |
| [TOMA]Br-DecA (1 : 2) | 298.15 | 90     | -4.41 | -3.90 | -5.01 | -4.27 |                                      |
| [TOMA]Br-DecA (1 : 2) | 308.15 | 190    | -3.72 | -3.17 | -4.15 | -3.65 |                                      |
| [TOMA]Br-DecA (1 : 2) | 308.15 | 290    | -3.31 | -2.77 | -3.73 | -3.22 |                                      |
| [TOMA]Br-DecA (1 : 2) | 308.15 | 390    | -3.01 | -2.49 | -3.44 | -2.95 |                                      |
| [TOMA]Br-DecA (1 : 2) | 308.15 | 490    | -2.78 | -2.28 | -3.22 | -2.74 |                                      |
| [TOMA]Br-DecA (1 : 2) | 308.15 | 790    | -2.33 | -1.85 | -2.76 | -2.30 |                                      |
| [TOMA]Br-DecA (1 : 2) | 308.15 | 990    | -2.12 | -1.65 | -2.55 | -2.09 |                                      |
| [TOMA]Br-DecA (1 : 2) | 308.15 | 1490   | -1.75 | -1.32 | -2.16 | -1.73 |                                      |
| [TOMA]Br-DecA (1 : 2) | 308.15 | 1990   | -1.49 | -1.09 | -1.88 | -1.53 |                                      |
| [TOMA]Br-DecA (1 : 2) | 323.15 | 90     | -4.54 | -4.21 | -5.02 | -4.66 |                                      |
| [TOMA]Br-DecA (1 : 2) | 323.15 | 190    | -3.87 | -3.48 | -4.28 | -3.90 |                                      |
| [TOMA]Br-DecA (1 : 2) | 323.15 | 290    | -3.49 | -3.07 | -3.86 | -3.47 |                                      |
| [TOMA]Br-DecA (1 : 2) | 323.15 | 390    | -3.16 | -2.78 | -3.56 | -3.20 |                                      |
| [TOMA]Br-DecA (1 : 2) | 323.15 | 490    | -2.94 | -2.57 | -3.34 | -2.99 |                                      |
| [TOMA]Br-DecA (1 : 2) | 323.15 | 790    | -2.50 | -2.12 | -2.86 | -2.54 |                                      |
| [TOMA]Br-DecA (1 : 2) | 323.15 | 990    | -2.29 | -1.92 | -2.64 | -2.32 |                                      |
| [TOMA]Br-DecA (1 : 2) | 323.15 | 1490   | -1.91 | -1.57 | -2.24 | -1.96 |                                      |
| [TOMA]Br-DecA (1 : 2) | 323.15 | 1990   | -1.66 | -1.33 | -1.95 | -1.75 |                                      |
| [Ch]Cl-EG (1 : 2)     | 303.15 | 643.6  | -3.64 | -3.13 | -4.11 | -3.67 | Haider et al.<br>(2018) <sup>9</sup> |
| [Ch]Cl-EG (1 : 2)     | 303.15 | 734.2  | -3.50 | -3.00 | -3.98 | -3.52 |                                      |
| [Ch]Cl-EG (1 : 2)     | 303.15 | 823.9  | -3.38 | -2.89 | -3.86 | -3.39 |                                      |
| [Ch]Cl-EG (1 : 2)     | 303.15 | 1046.2 | -3.14 | -2.65 | -3.60 | -3.11 |                                      |
| [Ch]Cl-EG (1 : 2)     | 303.15 | 1246.2 | -2.96 | -2.48 | -3.41 | -2.92 |                                      |
| [TBA]Br-EG (1 : 2)    | 303.15 | 412    | -4.19 | -2.81 | -3.82 | -4.17 | Haider et al.<br>(2018) <sup>9</sup> |
| [TBA]Br-EG (1 : 2)    | 303.15 | 774.8  | -3.50 | -2.23 | -3.20 | -3.44 |                                      |
| [TBA]Br-EG (1 : 2)    | 303.15 | 887.6  | -3.49 | -2.11 | -3.07 | -3.26 |                                      |

|                      |        |        |       |       |       |       |                                   |
|----------------------|--------|--------|-------|-------|-------|-------|-----------------------------------|
| [TBA]Br-EG (1 : 2)   | 303.15 | 1060.9 | -3.15 | -1.96 | -2.90 | -3.04 |                                   |
| [TBA]Br-EG (1 : 2)   | 303.15 | 1291.1 | -2.92 | -1.79 | -2.71 | -2.79 |                                   |
| [TBA]Br-DEG (1 : 2)  | 303.15 | 720.8  | -3.40 | -1.93 | -2.91 | -3.25 | Haider et al. (2018) <sup>9</sup> |
| [TBA]Br-DEG (1 : 2)  | 303.15 | 962.5  | -2.91 | -1.69 | -2.64 | -2.86 |                                   |
| [TBA]Br-DEG (1 : 2)  | 303.15 | 1005   | -2.83 | -1.65 | -2.60 | -2.80 |                                   |
| [TBA]Br-DEG (1 : 2)  | 303.15 | 1096.3 | -2.64 | -1.58 | -2.52 | -2.68 |                                   |
| [TBA]Br-DEG (1 : 2)  | 303.15 | 1392.5 | -2.31 | -1.39 | -2.30 | -2.37 |                                   |
| [TBA]Br-MDA (1 : 2)  | 303.15 | 610.5  | -3.07 | -1.89 | -2.88 | -2.99 | Haider et al. (2018) <sup>9</sup> |
| [TBA]Br-MDA (1 : 2)  | 303.15 | 734.6  | -2.71 | -1.74 | -2.71 | -2.72 |                                   |
| [TBA]Br-MDA (1 : 2)  | 303.15 | 823    | -2.58 | -1.64 | -2.61 | -2.54 |                                   |
| [TBA]Br-MDA (1 : 2)  | 303.15 | 930.6  | -2.31 | -1.54 | -2.50 | -2.34 |                                   |
| [TBA]Br-MDA (1 : 2)  | 303.15 | 1011.2 | -2.28 | -1.47 | -2.42 | -2.20 |                                   |
| [TBA]Br-DecA (1 : 2) | 303.15 | 488    | -2.86 | -2.20 | -3.20 | -2.98 | Luo et al. (2021) <sup>10</sup>   |
| [TBA]Br-DecA (1 : 2) | 303.15 | 564    | -2.66 | -2.07 | -3.06 | -2.84 |                                   |
| [TBA]Br-DecA (1 : 2) | 303.15 | 654    | -2.49 | -1.93 | -2.92 | -2.68 |                                   |
| [TBA]Br-DecA (1 : 2) | 303.15 | 771    | -2.38 | -1.79 | -2.77 | -2.50 |                                   |
| [TBA]Br-DecA (1 : 2) | 303.15 | 914    | -2.21 | -1.65 | -2.61 | -2.31 |                                   |
| [TBA]Br-DecA (1 : 2) | 303.15 | 1004   | -2.11 | -1.57 | -2.52 | -2.20 |                                   |
| [TBA]Br-DecA (1 : 2) | 303.15 | 1117   | -2.03 | -1.48 | -2.42 | -2.08 |                                   |
| [TBA]Br-DecA (1 : 2) | 313.15 | 470    | -3.06 | -2.43 | -3.32 | -3.20 |                                   |
| [TBA]Br-DecA (1 : 2) | 313.15 | 607    | -2.80 | -2.20 | -3.07 | -2.93 |                                   |
| [TBA]Br-DecA (1 : 2) | 313.15 | 653    | -2.74 | -2.13 | -3.00 | -2.85 |                                   |
| [TBA]Br-DecA (1 : 2) | 313.15 | 736    | -2.58 | -2.02 | -2.88 | -2.72 |                                   |
| [TBA]Br-DecA (1 : 2) | 313.15 | 841    | -2.45 | -1.91 | -2.75 | -2.57 |                                   |
| [TBA]Br-DecA (1 : 2) | 313.15 | 1030   | -2.27 | -1.73 | -2.56 | -2.34 |                                   |
| [TBA]Br-DecA (1 : 2) | 313.15 | 1138   | -2.18 | -1.64 | -2.46 | -2.23 |                                   |
| [TBA]Br-HexA (1 : 2) | 303.15 | 474    | -2.96 | -2.34 | -3.34 | -3.11 | Luo et al. (2021) <sup>10</sup>   |

|                      |        |      |       |       |       |       |                                      |
|----------------------|--------|------|-------|-------|-------|-------|--------------------------------------|
| [TBA]Br-HexA (1 : 2) | 303.15 | 543  | -2.78 | -2.22 | -3.21 | -2.96 |                                      |
| [TBA]Br-HexA (1 : 2) | 303.15 | 629  | -2.68 | -2.08 | -3.07 | -2.80 |                                      |
| [TBA]Br-HexA (1 : 2) | 303.15 | 722  | -2.54 | -1.96 | -2.94 | -2.65 |                                      |
| [TBA]Br-HexA (1 : 2) | 303.15 | 825  | -2.43 | -1.85 | -2.82 | -2.49 |                                      |
| [TBA]Br-HexA (1 : 2) | 303.15 | 1058 | -2.18 | -1.64 | -2.58 | -2.20 |                                      |
| [TBA]Br-HexA (1 : 2) | 303.15 | 1103 | -2.11 | -1.60 | -2.54 | -2.15 |                                      |
| [TBA]Br-HexA (1 : 2) | 313.15 | 444  | -3.18 | -2.61 | -3.49 | -3.35 |                                      |
| [TBA]Br-HexA (1 : 2) | 313.15 | 534  | -3.02 | -2.43 | -3.31 | -3.15 |                                      |
| [TBA]Br-HexA (1 : 2) | 313.15 | 657  | -2.81 | -2.25 | -3.11 | -2.93 |                                      |
| [TBA]Br-HexA (1 : 2) | 313.15 | 809  | -2.63 | -2.06 | -2.91 | -2.68 |                                      |
| [TBA]Br-HexA (1 : 2) | 313.15 | 942  | -2.47 | -1.92 | -2.76 | -2.50 |                                      |
| [TBA]Br-HexA (1 : 2) | 313.15 | 1056 | -2.41 | -1.82 | -2.65 | -2.37 |                                      |
| [TBA]Br-HexA (1 : 2) | 313.15 | 1110 | -2.34 | -1.78 | -2.60 | -2.31 |                                      |
| [TBA]Br-HexA (1 : 2) | 323.15 | 480  | -3.31 | -2.73 | -3.50 | -3.43 |                                      |
| [TBA]Br-HexA (1 : 2) | 323.15 | 558  | -3.13 | -2.59 | -3.35 | -3.27 |                                      |
| [TBA]Br-HexA (1 : 2) | 323.15 | 653  | -2.99 | -2.44 | -3.20 | -3.09 |                                      |
| [TBA]Br-HexA (1 : 2) | 323.15 | 745  | -2.87 | -2.32 | -3.07 | -2.94 |                                      |
| [TBA]Br-HexA (1 : 2) | 323.15 | 834  | -2.80 | -2.22 | -2.95 | -2.80 |                                      |
| [TBA]Br-HexA (1 : 2) | 323.15 | 959  | -2.70 | -2.09 | -2.82 | -2.63 |                                      |
| [TBA]Br-HexA (1 : 2) | 323.15 | 1105 | -2.54 | -1.97 | -2.67 | -2.46 |                                      |
| [BHDE]Cl-AC (1 : 2)  | 298.15 | 210  | -4.95 | -3.81 | -4.90 | -4.98 | Sarmad et al.<br>(2017) <sup>6</sup> |
| [BHDE]Cl-AC (1 : 2)  | 298.15 | 533  | -3.83 | -2.89 | -3.95 | -3.98 |                                      |
| [BHDE]Cl-AC (1 : 2)  | 298.15 | 857  | -3.39 | -2.42 | -3.45 | -3.43 |                                      |
| [BHDE]Cl-AC (1 : 2)  | 298.15 | 1167 | -3.01 | -2.12 | -3.12 | -3.06 |                                      |
| [BHDE]Cl-AC (1 : 2)  | 298.15 | 1440 | -2.73 | -1.92 | -2.89 | -2.81 |                                      |
| [BHDE]Cl-AC (1 : 2)  | 298.15 | 1771 | -2.53 | -1.72 | -2.65 | -2.59 |                                      |
| [BHDE]Cl-AC (1 : 2)  | 298.15 | 2026 | -2.45 | -1.59 | -2.50 | -2.45 |                                      |
| [BHDE]Cl-LA (1 : 2)  | 298.15 | 283  | -6.16 | -3.76 | -4.84 | -4.82 |                                      |

|                       |        |      |       |       |       |       |                                 |
|-----------------------|--------|------|-------|-------|-------|-------|---------------------------------|
| [BHDE]Cl-LA (1 : 2)   | 298.15 | 516  | -5.18 | -3.16 | -4.22 | -4.25 |                                 |
| [BHDE]Cl-LA (1 : 2)   | 298.15 | 866  | -4.15 | -2.64 | -3.67 | -3.73 |                                 |
| [BHDE]Cl-LA (1 : 2)   | 298.15 | 1134 | -3.77 | -2.37 | -3.37 | -3.45 |                                 |
| [BHDE]Cl-LA (1 : 2)   | 298.15 | 1458 | -3.34 | -2.12 | -3.09 | -3.22 |                                 |
| [BHDE]Cl-LA (1 : 2)   | 298.15 | 1722 | -3.01 | -1.95 | -2.89 | -3.09 |                                 |
| [BHDE]Cl-LA (1 : 2)   | 298.15 | 2086 | -2.79 | -1.76 | -2.66 | -2.96 |                                 |
| [Ch]Cl-Phenol (1 : 2) | 313.15 | 1990 | -2.43 | -1.58 | -2.31 | -2.51 | Ji et al. (2016) <sup>11</sup>  |
| [Ch]Cl-Phenol (1 : 2) | 313.15 | 3460 | -2.07 | -0.92 | -1.51 | -2.02 |                                 |
| [Ch]Cl-Phenol (1 : 2) | 313.15 | 5010 | -1.83 | -0.78 | -1.21 | -1.62 |                                 |
| [Ch]Cl-Phenol (1 : 2) | 323.15 | 1710 | -2.65 | -1.96 | -2.61 | -2.80 |                                 |
| [Ch]Cl-Phenol (1 : 2) | 323.15 | 2460 | -2.41 | -1.57 | -2.14 | -2.45 |                                 |
| [Ch]Cl-Phenol (1 : 2) | 323.15 | 4390 | -2.00 | -0.87 | -1.25 | -1.91 |                                 |
| [Ch]Cl-Phenol (1 : 2) | 323.15 | 5410 | -1.87 | -0.90 | -1.18 | -1.65 |                                 |
| [Ch]Cl-Phenol (1 : 2) | 333.15 | 2820 | -2.56 | -1.63 | -2.06 | -2.45 |                                 |
| [Ch]Cl-Phenol (1 : 2) | 333.15 | 3810 | -2.25 | -1.30 | -1.63 | -2.18 |                                 |
| [Ch]Cl-Phenol (1 : 2) | 333.15 | 5610 | -2.00 | -0.77 | -0.92 | -1.72 |                                 |
| [Ch]Cl-Phenol (1 : 2) | 333.15 | 7620 | -1.76 | -0.74 | -0.69 | -1.21 |                                 |
| [TEA]Br-HexA (1 : 2)  | 303.15 | 412  | -3.43 | -2.61 | -3.62 | -3.62 | Luo et al. (2021) <sup>10</sup> |
| [TEA]Br-HexA (1 : 2)  | 303.15 | 521  | -3.25 | -2.38 | -3.38 | -3.37 |                                 |
| [TEA]Br-HexA (1 : 2)  | 303.15 | 609  | -3.08 | -2.24 | -3.23 | -3.20 |                                 |
| [TEA]Br-HexA (1 : 2)  | 303.15 | 688  | -2.94 | -2.12 | -3.11 | -3.06 |                                 |
| [TEA]Br-HexA (1 : 2)  | 303.15 | 803  | -2.75 | -1.98 | -2.95 | -2.88 |                                 |
| [TEA]Br-HexA (1 : 2)  | 303.15 | 913  | -2.62 | -1.87 | -2.83 | -2.72 |                                 |
| [TEA]Br-HexA (1 : 2)  | 303.15 | 1130 | -2.42 | -1.68 | -2.61 | -2.47 |                                 |
| [TEA]Br-HexA (1 : 2)  | 313.15 | 528  | -3.38 | -2.58 | -3.46 | -3.53 |                                 |
| [TEA]Br-HexA (1 : 2)  | 313.15 | 627  | -3.21 | -2.42 | -3.29 | -3.34 |                                 |
| [TEA]Br-HexA (1 : 2)  | 313.15 | 727  | -3.04 | -2.28 | -3.14 | -3.17 |                                 |
| [TEA]Br-HexA (1 : 2)  | 313.15 | 804  | -2.89 | -2.19 | -3.04 | -3.05 |                                 |



|                          |        |        |       |       |       |       |                                       |
|--------------------------|--------|--------|-------|-------|-------|-------|---------------------------------------|
| [TEA]Br-HexA (1 : 2)     | 313.15 | 955    | -2.77 | -2.03 | -2.86 | -2.84 |                                       |
| [TEA]Br-HexA (1 : 2)     | 313.15 | 1084   | -2.58 | -1.91 | -2.73 | -2.68 |                                       |
| [TEA]Br-HexA (1 : 2)     | 313.15 | 1129   | -2.54 | -1.87 | -2.69 | -2.63 |                                       |
| [TEA]Br-HexA (1 : 2)     | 323.15 | 423    | -3.68 | -3.00 | -3.77 | -3.93 |                                       |
| [TEA]Br-HexA (1 : 2)     | 323.15 | 521    | -3.49 | -2.79 | -3.56 | -3.71 |                                       |
| [TEA]Br-HexA (1 : 2)     | 323.15 | 685    | -3.21 | -2.53 | -3.28 | -3.40 |                                       |
| [TEA]Br-HexA (1 : 2)     | 323.15 | 821    | -3.04 | -2.36 | -3.10 | -3.18 |                                       |
| [TEA]Br-HexA (1 : 2)     | 323.15 | 900    | -2.92 | -2.27 | -3.00 | -3.06 |                                       |
| [TEA]Br-HexA (1 : 2)     | 323.15 | 1132   | -2.71 | -2.06 | -2.77 | -2.78 |                                       |
| [TEA]Br-HexA (1 : 2)     | 323.15 | 1263   | -2.60 | -1.96 | -2.65 | -2.65 |                                       |
| L-menthol-thymol (1 : 2) | 293.15 | 4020.1 | -0.93 |       | -0.77 | -0.89 | Alhadid et al.<br>(2022) <sup>2</sup> |
| L-menthol-thymol (1 : 2) | 293.15 | 3369.1 | -1.06 |       | -0.84 | -1.02 |                                       |
| L-menthol-thymol (1 : 2) | 293.15 | 2486   | -1.34 |       | -0.93 | -1.21 |                                       |
| L-menthol-thymol (1 : 2) | 293.15 | 1628.1 | -1.72 | -0.87 | -1.88 | -1.44 |                                       |
| L-menthol-thymol (1 : 2) | 303.15 | 4096.7 | -1.05 |       | -0.64 | -1.03 |                                       |
| L-menthol-thymol (1 : 2) | 303.15 | 3424.7 | -1.15 |       | -0.71 | -1.17 |                                       |
| L-menthol-thymol (1 : 2) | 303.15 | 2522.9 | -1.43 | -0.70 | -1.50 | -1.36 |                                       |
| L-menthol-thymol (1 : 2) | 303.15 | 1647.8 | -1.80 | -1.06 | -1.94 | -1.59 |                                       |
| L-menthol-thymol (1 : 2) | 313.15 | 4154.3 | -1.13 |       | -0.51 | -1.17 |                                       |
| L-menthol-thymol (1 : 2) | 313.15 | 3470.3 | -1.27 |       | -0.58 | -1.31 |                                       |
| L-menthol-thymol (1 : 2) | 313.15 | 2554.1 | -1.51 | -0.87 | -1.54 | -1.50 |                                       |
| L-menthol-thymol (1 : 2) | 313.15 | 1666.2 | -1.87 | -1.24 | -2.00 | -1.74 |                                       |
| L-menthol-thymol (1 : 2) | 323.15 | 4193.9 | -1.18 |       | -0.40 | -1.30 |                                       |
| L-menthol-thymol (1 : 2) | 323.15 | 3505.9 | -1.34 | -0.78 | -1.24 | -1.44 |                                       |
| L-menthol-thymol (1 : 2) | 323.15 | 2590   | -1.57 | -1.03 | -1.59 | -1.64 |                                       |
| L-menthol-thymol (1 : 2) | 323.15 | 1681.9 | -1.94 | -1.41 | -2.06 | -1.87 |                                       |
| [Ch]Cl-Urea (1 : 2.5)    | 313.15 | 1150   | -3.08 | -2.83 | -3.63 | -2.95 | Li et al. (2008) <sup>3</sup>         |

|                       |        |       |       |       |       |       |                               |
|-----------------------|--------|-------|-------|-------|-------|-------|-------------------------------|
| [Ch]Cl-Urea (1 : 2.5) | 313.15 | 2670  | -2.43 | -2.09 | -2.69 | -2.39 |                               |
| [Ch]Cl-Urea (1 : 2.5) | 313.15 | 4530  | -2.08 | -1.64 | -1.98 | -2.00 |                               |
| [Ch]Cl-Urea (1 : 2.5) | 313.15 | 6670  | -1.86 | -1.27 | -1.32 | -1.57 |                               |
| [Ch]Cl-Urea (1 : 2.5) | 323.15 | 1060  | -3.24 | -3.11 | -3.83 | -3.16 |                               |
| [Ch]Cl-Urea (1 : 2.5) | 323.15 | 2500  | -2.55 | -2.34 | -2.86 | -2.57 |                               |
| [Ch]Cl-Urea (1 : 2.5) | 323.15 | 4120  | -2.23 | -1.90 | -2.21 | -2.22 |                               |
| [Ch]Cl-Urea (1 : 2.5) | 323.15 | 6200  | -2.01 | -1.54 | -1.56 | -1.80 |                               |
| [Ch]Cl-Urea (1 : 2.5) | 333.15 | 1080  | -3.44 | -3.30 | -3.93 | -3.27 |                               |
| [Ch]Cl-Urea (1 : 2.5) | 333.15 | 2540  | -2.69 | -2.51 | -2.94 | -2.68 |                               |
| [Ch]Cl-Urea (1 : 2.5) | 333.15 | 4030  | -2.41 | -2.10 | -2.33 | -2.36 |                               |
| [Ch]Cl-Urea (1 : 2.5) | 333.15 | 5980  | -2.15 | -1.75 | -1.71 | -1.97 |                               |
| [Ch]Cl-DEG (1 : 3)    | 293.15 | 112.8 | -5.60 | -4.03 | -5.17 | -5.57 | Li et al. (2014) <sup>7</sup> |
| [Ch]Cl-DEG (1 : 3)    | 293.15 | 212.2 | -4.88 | -3.40 | -4.52 | -4.85 |                               |
| [Ch]Cl-DEG (1 : 3)    | 293.15 | 314.9 | -4.51 | -3.00 | -4.11 | -4.42 |                               |
| [Ch]Cl-DEG (1 : 3)    | 293.15 | 409.8 | -4.22 | -2.74 | -3.83 | -4.15 |                               |
| [Ch]Cl-DEG (1 : 3)    | 293.15 | 512.9 | -3.97 | -2.51 | -3.59 | -3.92 |                               |
| [Ch]Cl-DEG (1 : 3)    | 303.15 | 117.7 | -5.60 | -4.23 | -5.28 | -5.70 |                               |
| [Ch]Cl-DEG (1 : 3)    | 303.15 | 215.1 | -4.98 | -3.63 | -4.66 | -5.01 |                               |
| [Ch]Cl-DEG (1 : 3)    | 303.15 | 321.3 | -4.56 | -3.23 | -4.24 | -4.58 |                               |
| [Ch]Cl-DEG (1 : 3)    | 303.15 | 415.1 | -4.30 | -2.97 | -3.97 | -4.32 |                               |
| [Ch]Cl-DEG (1 : 3)    | 303.15 | 524   | -4.08 | -2.74 | -3.72 | -4.08 |                               |
| [Ch]Cl-DEG (1 : 3)    | 313.15 | 116.9 | -5.81 | -4.46 | -5.43 | -5.87 |                               |
| [Ch]Cl-DEG (1 : 3)    | 313.15 | 219.6 | -5.13 | -3.83 | -4.78 | -5.16 |                               |
| [Ch]Cl-DEG (1 : 3)    | 313.15 | 327   | -4.70 | -3.43 | -4.36 | -4.73 |                               |
| [Ch]Cl-DEG (1 : 3)    | 313.15 | 417.7 | -4.47 | -3.18 | -4.10 | -4.48 |                               |
| [Ch]Cl-DEG (1 : 3)    | 313.15 | 515.7 | -4.25 | -2.97 | -3.87 | -4.26 |                               |
| [Ch]Cl-DEG (1 : 3)    | 323.15 | 122.5 | -5.99 | -4.62 | -5.50 | -5.97 |                               |
| [Ch]Cl-DEG (1 : 3)    | 323.15 | 220.3 | -5.38 | -4.03 | -4.90 | -5.31 |                               |

|                    |        |       |       |       |       |       |                                |
|--------------------|--------|-------|-------|-------|-------|-------|--------------------------------|
| [Ch]Cl-DEG (1 : 3) | 323.15 | 321   | -4.99 | -3.65 | -4.50 | -4.91 |                                |
| [Ch]Cl-DEG (1 : 3) | 323.15 | 421.2 | -4.69 | -3.38 | -4.21 | -4.63 |                                |
| [Ch]Cl-DEG (1 : 3) | 323.15 | 518   | -4.46 | -3.17 | -3.99 | -4.42 |                                |
| [Ch]Cl-FA (1 : 3)  | 303.15 | 80.9  | -5.84 | -4.57 | -5.63 | -5.92 | Lu et al. (2015) <sup>12</sup> |
| [Ch]Cl-FA (1 : 3)  | 303.15 | 218.3 | -4.88 | -3.57 | -4.61 | -4.90 |                                |
| [Ch]Cl-FA (1 : 3)  | 303.15 | 323.7 | -4.47 | -3.18 | -4.19 | -4.50 |                                |
| [Ch]Cl-FA (1 : 3)  | 303.15 | 425.3 | -4.22 | -2.90 | -3.90 | -4.22 |                                |
| [Ch]Cl-FA (1 : 3)  | 303.15 | 524.1 | -4.02 | -2.69 | -3.67 | -4.01 |                                |
| [Ch]Cl-FA (1 : 3)  | 303.15 | 582.8 | -3.93 | -2.58 | -3.56 | -3.90 |                                |
| [Ch]Cl-FA (1 : 3)  | 313.15 | 80.8  | -6.03 | -4.79 | -5.77 | -6.08 |                                |
| [Ch]Cl-FA (1 : 3)  | 313.15 | 214.6 | -5.07 | -3.81 | -4.77 | -5.09 |                                |
| [Ch]Cl-FA (1 : 3)  | 313.15 | 321.4 | -4.66 | -3.41 | -4.34 | -4.67 |                                |
| [Ch]Cl-FA (1 : 3)  | 313.15 | 426.7 | -4.37 | -3.12 | -4.04 | -4.39 |                                |
| [Ch]Cl-FA (1 : 3)  | 313.15 | 523.2 | -4.17 | -2.92 | -3.81 | -4.18 |                                |
| [Ch]Cl-FA (1 : 3)  | 313.15 | 581.7 | -4.06 | -2.81 | -3.70 | -4.06 |                                |
| [Ch]Cl-FA (1 : 3)  | 323.15 | 81.5  | -6.07 | -4.99 | -5.89 | -6.21 |                                |
| [Ch]Cl-FA (1 : 3)  | 323.15 | 222.1 | -5.19 | -3.99 | -4.86 | -5.20 |                                |
| [Ch]Cl-FA (1 : 3)  | 323.15 | 329.6 | -4.78 | -3.59 | -4.44 | -4.80 |                                |
| [Ch]Cl-FA (1 : 3)  | 323.15 | 428.9 | -4.51 | -3.33 | -4.16 | -4.53 |                                |
| [Ch]Cl-FA (1 : 3)  | 323.15 | 528.6 | -4.31 | -3.11 | -3.93 | -4.31 |                                |
| [Ch]Cl-FA (1 : 3)  | 323.15 | 585.3 | -4.21 | -3.01 | -3.82 | -4.20 |                                |
| [Ch]Cl-FA (1 : 3)  | 333.15 | 86.3  | -6.32 | -5.13 | -5.94 | -6.30 |                                |
| [Ch]Cl-FA (1 : 3)  | 333.15 | 224.4 | -5.36 | -4.17 | -4.96 | -5.33 |                                |
| [Ch]Cl-FA (1 : 3)  | 333.15 | 330.3 | -4.93 | -3.78 | -4.56 | -4.94 |                                |
| [Ch]Cl-FA (1 : 3)  | 333.15 | 430.4 | -4.66 | -3.51 | -4.27 | -4.67 |                                |
| [Ch]Cl-FA (1 : 3)  | 333.15 | 530.6 | -4.44 | -3.30 | -4.05 | -4.45 |                                |
| [Ch]Cl-FA (1 : 3)  | 333.15 | 586.4 | -4.35 | -3.20 | -3.94 | -4.34 |                                |
| [Ch]Cl-LEV (1 : 3) | 303.15 | 79.4  | -5.45 | -4.69 | -5.74 | -5.41 | Lu et al. (2015) <sup>12</sup> |

|                       |        |       |       |       |       |       |                               |
|-----------------------|--------|-------|-------|-------|-------|-------|-------------------------------|
| [Ch]Cl-LEV (1 : 3)    | 303.15 | 208.4 | -4.50 | -3.72 | -4.76 | -4.49 |                               |
| [Ch]Cl-LEV (1 : 3)    | 303.15 | 310.9 | -4.11 | -3.32 | -4.34 | -4.08 |                               |
| [Ch]Cl-LEV (1 : 3)    | 303.15 | 411.9 | -3.84 | -3.04 | -4.04 | -3.79 |                               |
| [Ch]Cl-LEV (1 : 3)    | 303.15 | 510.9 | -3.61 | -2.82 | -3.81 | -3.56 |                               |
| [Ch]Cl-LEV (1 : 3)    | 303.15 | 570   | -3.50 | -2.71 | -3.69 | -3.43 |                               |
| [Ch]Cl-LEV (1 : 3)    | 313.15 | 69.8  | -5.78 | -5.04 | -6.01 | -5.70 |                               |
| [Ch]Cl-LEV (1 : 3)    | 313.15 | 202.5 | -4.71 | -3.97 | -4.92 | -4.72 |                               |
| [Ch]Cl-LEV (1 : 3)    | 313.15 | 306.8 | -4.28 | -3.56 | -4.49 | -4.30 |                               |
| [Ch]Cl-LEV (1 : 3)    | 313.15 | 410.9 | -4.01 | -3.26 | -4.18 | -4.00 |                               |
| [Ch]Cl-LEV (1 : 3)    | 313.15 | 508.5 | -3.78 | -3.05 | -3.95 | -3.77 |                               |
| [Ch]Cl-LEV (1 : 3)    | 313.15 | 579.8 | -3.65 | -2.92 | -3.81 | -3.61 |                               |
| [Ch]Cl-LEV (1 : 3)    | 323.15 | 80.8  | -5.91 | -5.10 | -5.99 | -5.76 |                               |
| [Ch]Cl-LEV (1 : 3)    | 323.15 | 210   | -4.89 | -4.14 | -5.01 | -4.86 |                               |
| [Ch]Cl-LEV (1 : 3)    | 323.15 | 314   | -4.48 | -3.74 | -4.59 | -4.46 |                               |
| [Ch]Cl-LEV (1 : 3)    | 323.15 | 417.6 | -4.20 | -3.45 | -4.29 | -4.17 |                               |
| [Ch]Cl-LEV (1 : 3)    | 323.15 | 517.8 | -3.98 | -3.24 | -4.06 | -3.93 |                               |
| [Ch]Cl-LEV (1 : 3)    | 323.15 | 579.7 | -3.87 | -3.12 | -3.93 | -3.79 |                               |
| [Ch]Cl-LEV (1 : 3)    | 333.15 | 85.9  | -5.99 | -5.23 | -6.05 | -5.88 |                               |
| [Ch]Cl-LEV (1 : 3)    | 333.15 | 219.8 | -5.02 | -4.29 | -5.08 | -4.99 |                               |
| [Ch]Cl-LEV (1 : 3)    | 333.15 | 321.6 | -4.59 | -3.91 | -4.69 | -4.61 |                               |
| [Ch]Cl-LEV (1 : 3)    | 333.15 | 425.2 | -4.32 | -3.63 | -4.39 | -4.32 |                               |
| [Ch]Cl-LEV (1 : 3)    | 333.15 | 524.9 | -4.12 | -3.42 | -4.16 | -4.08 |                               |
| [Ch]Cl-LEV (1 : 3)    | 333.15 | 583   | -4.00 | -3.31 | -4.04 | -3.96 |                               |
| [Ch]Cl-Phenol (1 : 3) | 293.15 | 104.4 | -5.45 | -3.98 | -5.12 | -5.47 | Li et al. (2014) <sup>7</sup> |
| [Ch]Cl-Phenol (1 : 3) | 293.15 | 206.3 | -4.76 | -3.29 | -4.42 | -4.75 |                               |
| [Ch]Cl-Phenol (1 : 3) | 293.15 | 307.7 | -4.36 | -2.89 | -4.00 | -4.32 |                               |
| [Ch]Cl-Phenol (1 : 3) | 293.15 | 406.2 | -4.11 | -2.60 | -3.70 | -4.04 |                               |
| [Ch]Cl-Phenol (1 : 3) | 293.15 | 508.5 | -3.85 | -2.37 | -3.45 | -3.81 |                               |

|                       |        |       |       |       |       |       |                               |
|-----------------------|--------|-------|-------|-------|-------|-------|-------------------------------|
| [Ch]Cl-Phenol (1 : 3) | 303.15 | 113.1 | -5.66 | -4.15 | -5.20 | -5.57 |                               |
| [Ch]Cl-Phenol (1 : 3) | 303.15 | 217.6 | -4.99 | -3.49 | -4.53 | -4.87 |                               |
| [Ch]Cl-Phenol (1 : 3) | 303.15 | 316.3 | -4.58 | -3.11 | -4.13 | -4.48 |                               |
| [Ch]Cl-Phenol (1 : 3) | 303.15 | 418.3 | -4.28 | -2.83 | -3.83 | -4.20 |                               |
| [Ch]Cl-Phenol (1 : 3) | 303.15 | 514.2 | -4.03 | -2.62 | -3.60 | -3.98 |                               |
| [Ch]Cl-Phenol (1 : 3) | 313.15 | 116   | -5.74 | -4.35 | -5.32 | -5.72 |                               |
| [Ch]Cl-Phenol (1 : 3) | 313.15 | 218.1 | -5.05 | -3.72 | -4.67 | -5.05 |                               |
| [Ch]Cl-Phenol (1 : 3) | 313.15 | 317.3 | -4.66 | -3.34 | -4.27 | -4.66 |                               |
| [Ch]Cl-Phenol (1 : 3) | 313.15 | 411.5 | -4.39 | -3.08 | -3.99 | -4.39 |                               |
| [Ch]Cl-Phenol (1 : 3) | 313.15 | 506.8 | -4.16 | -2.86 | -3.76 | -4.17 |                               |
| [Ch]Cl-Phenol (1 : 3) | 323.15 | 123.4 | -5.84 | -4.50 | -5.39 | -5.82 |                               |
| [Ch]Cl-Phenol (1 : 3) | 323.15 | 218.1 | -5.22 | -3.93 | -4.80 | -5.21 |                               |
| [Ch]Cl-Phenol (1 : 3) | 323.15 | 318.2 | -4.84 | -3.55 | -4.40 | -4.82 |                               |
| [Ch]Cl-Phenol (1 : 3) | 323.15 | 412.5 | -4.55 | -3.29 | -4.13 | -4.55 |                               |
| [Ch]Cl-Phenol (1 : 3) | 323.15 | 513.6 | -4.32 | -3.07 | -3.89 | -4.32 |                               |
| [Ch]Cl-TEG (1 : 3)    | 293.15 | 109.3 | -5.26 | -3.56 | -4.70 | -5.21 | Li et al. (2014) <sup>7</sup> |
| [Ch]Cl-TEG (1 : 3)    | 293.15 | 208.6 | -4.53 | -2.91 | -4.04 | -4.49 |                               |
| [Ch]Cl-TEG (1 : 3)    | 293.15 | 315.9 | -4.10 | -2.50 | -3.60 | -4.03 |                               |
| [Ch]Cl-TEG (1 : 3)    | 293.15 | 403.3 | -3.85 | -2.25 | -3.34 | -3.76 |                               |
| [Ch]Cl-TEG (1 : 3)    | 293.15 | 504   | -3.60 | -2.02 | -3.10 | -3.52 |                               |
| [Ch]Cl-TEG (1 : 3)    | 303.15 | 119.3 | -5.36 | -3.71 | -4.76 | -5.31 |                               |
| [Ch]Cl-TEG (1 : 3)    | 303.15 | 212.9 | -4.72 | -3.13 | -4.17 | -4.66 |                               |
| [Ch]Cl-TEG (1 : 3)    | 303.15 | 319.4 | -4.28 | -2.73 | -3.74 | -4.22 |                               |
| [Ch]Cl-TEG (1 : 3)    | 303.15 | 416.7 | -3.97 | -2.46 | -3.46 | -3.93 |                               |
| [Ch]Cl-TEG (1 : 3)    | 303.15 | 512.7 | -3.76 | -2.25 | -3.23 | -3.70 |                               |
| [Ch]Cl-TEG (1 : 3)    | 313.15 | 114   | -5.57 | -3.98 | -4.95 | -5.54 |                               |
| [Ch]Cl-TEG (1 : 3)    | 313.15 | 220.8 | -4.85 | -3.32 | -4.27 | -4.81 |                               |
| [Ch]Cl-TEG (1 : 3)    | 313.15 | 318.2 | -4.50 | -2.95 | -3.89 | -4.41 |                               |

|                      |        |       |       |       |       |       |                                      |
|----------------------|--------|-------|-------|-------|-------|-------|--------------------------------------|
| [Ch]Cl-TEG (1 : 3)   | 313.15 | 414.9 | -4.17 | -2.69 | -3.60 | -4.12 |                                      |
| [Ch]Cl-TEG (1 : 3)   | 313.15 | 510.6 | -3.94 | -2.48 | -3.38 | -3.89 |                                      |
| [Ch]Cl-TEG (1 : 3)   | 323.15 | 119.2 | -5.68 | -4.14 | -5.03 | -5.65 |                                      |
| [Ch]Cl-TEG (1 : 3)   | 323.15 | 216.7 | -5.04 | -3.55 | -4.42 | -4.99 |                                      |
| [Ch]Cl-TEG (1 : 3)   | 323.15 | 318.8 | -4.66 | -3.16 | -4.01 | -4.57 |                                      |
| [Ch]Cl-TEG (1 : 3)   | 323.15 | 418.6 | -4.34 | -2.89 | -3.72 | -4.28 |                                      |
| [Ch]Cl-TEG (1 : 3)   | 323.15 | 516   | -4.12 | -2.68 | -3.50 | -4.04 |                                      |
| [MTPP]Br-LEV (1 : 3) | 298.15 | 301   | -5.47 | -2.87 | -3.94 | -5.25 | Sarmad et al.<br>(2017) <sup>6</sup> |
| [MTPP]Br-LEV (1 : 3) | 298.15 | 698   | -4.38 | -2.09 | -3.08 | -4.24 |                                      |
| [MTPP]Br-LEV (1 : 3) | 298.15 | 994   | -3.59 | -1.77 | -2.72 | -3.62 |                                      |
| [MTPP]Br-LEV (1 : 3) | 298.15 | 1209  | -3.08 | -1.60 | -2.51 | -3.24 |                                      |
| [MTPP]Br-LEV (1 : 3) | 298.15 | 1526  | -2.72 | -1.41 | -2.26 | -2.80 |                                      |
| [MTPP]Br-LEV (1 : 3) | 298.15 | 1759  | -2.39 | -1.18 | -2.00 | -2.56 |                                      |
| [MTPP]Br-LEV (1 : 3) | 298.15 | 2068  | -2.22 | -1.04 | -1.80 | -2.33 |                                      |
| [TEA]Cl-AC (1 : 3)   | 298.15 | 397   | -4.53 | -3.06 | -4.10 | -4.11 | Sarmad et al.<br>(2017) <sup>6</sup> |
| [TEA]Cl-AC (1 : 3)   | 298.15 | 654   | -3.63 | -2.58 | -3.59 | -3.61 |                                      |
| [TEA]Cl-AC (1 : 3)   | 298.15 | 957   | -3.17 | -2.23 | -3.18 | -3.20 |                                      |
| [TEA]Cl-AC (1 : 3)   | 298.15 | 1230  | -2.82 | -2.00 | -2.90 | -2.95 |                                      |
| [TEA]Cl-AC (1 : 3)   | 298.15 | 1634  | -2.55 | -1.74 | -2.58 | -2.68 |                                      |
| [TEA]Cl-AC (1 : 3)   | 298.15 | 2016  | -2.34 | -1.56 | -2.33 | -2.51 |                                      |
| [TEA]Cl-OctA (1 : 3) | 298.15 | 353   | -3.77 | -2.66 | -3.72 | -3.54 | Sarmad et al.<br>(2017) <sup>6</sup> |
| [TEA]Cl-OctA (1 : 3) | 298.15 | 624   | -3.02 | -2.12 | -3.13 | -3.02 |                                      |
| [TEA]Cl-OctA (1 : 3) | 298.15 | 940   | -2.50 | -1.73 | -2.68 | -2.65 |                                      |
| [TEA]Cl-OctA (1 : 3) | 298.15 | 1277  | -2.18 | -1.45 | -2.34 | -2.38 |                                      |
| [TEA]Cl-OctA (1 : 3) | 298.15 | 1619  | -1.96 | -1.23 | -2.07 | -2.20 |                                      |
| [TEA]Cl-OctA (1 : 3) | 298.15 | 2018  | -1.76 | -1.01 | -1.78 | -2.05 |                                      |

|                               |        |       |       |       |       |       |                                      |
|-------------------------------|--------|-------|-------|-------|-------|-------|--------------------------------------|
| [MTPP]Br-EG (1 : 3)           | 298.15 | 192   | -5.10 | -3.71 | -4.79 | -5.81 | Sarmad et al.<br>(2017) <sup>6</sup> |
| [MTPP]Br-EG (1 : 3)           | 298.15 | 437   | -4.42 | -2.92 | -3.96 | -4.90 |                                      |
| [MTPP]Br-EG (1 : 3)           | 298.15 | 710   | -4.00 | -2.47 | -3.46 | -4.32 |                                      |
| [MTPP]Br-EG (1 : 3)           | 298.15 | 1134  | -3.67 | -2.06 | -2.98 | -3.67 |                                      |
| [MTPP]Br-EG (1 : 3)           | 298.15 | 1528  | -3.44 | -1.80 | -2.66 | -3.28 |                                      |
| [MTPP]Br-EG (1 : 3)           | 298.15 | 2018  | -3.09 | -1.58 | -2.35 | -2.99 |                                      |
| [Ch]Cl-1,4-butanediol (1 : 3) | 293.15 | 110.9 | -5.68 | -4.19 | -5.33 | -5.80 | Chen et al.<br>(2014) <sup>13</sup>  |
| [Ch]Cl-1,4-butanediol (1 : 3) | 293.15 | 212.5 | -4.98 | -3.53 | -4.66 | -5.03 |                                      |
| [Ch]Cl-1,4-butanediol (1 : 3) | 293.15 | 312.5 | -4.61 | -3.14 | -4.25 | -4.60 |                                      |
| [Ch]Cl-1,4-butanediol (1 : 3) | 293.15 | 412   | -4.34 | -2.86 | -3.96 | -4.32 |                                      |
| [Ch]Cl-1,4-butanediol (1 : 3) | 293.15 | 509.7 | -4.11 | -2.65 | -3.72 | -4.10 |                                      |
| [Ch]Cl-1,4-butanediol (1 : 3) | 303.15 | 113.1 | -5.78 | -4.40 | -5.45 | -5.98 |                                      |
| [Ch]Cl-1,4-butanediol (1 : 3) | 303.15 | 217.4 | -5.12 | -3.75 | -4.78 | -5.22 |                                      |
| [Ch]Cl-1,4-butanediol (1 : 3) | 303.15 | 307.6 | -4.74 | -3.40 | -4.41 | -4.83 |                                      |
| [Ch]Cl-1,4-butanediol (1 : 3) | 303.15 | 406.3 | -4.45 | -3.11 | -4.12 | -4.54 |                                      |
| [Ch]Cl-1,4-butanediol (1 : 3) | 303.15 | 497.5 | -4.25 | -2.91 | -3.90 | -4.34 |                                      |
| [Ch]Cl-1,4-butanediol (1 : 3) | 313.15 | 121.4 | -5.88 | -4.54 | -5.51 | -6.10 |                                      |
| [Ch]Cl-1,4-butanediol (1 : 3) | 313.15 | 233.1 | -5.26 | -3.89 | -4.84 | -5.35 |                                      |
| [Ch]Cl-1,4-butanediol (1 : 3) | 313.15 | 321.6 | -4.92 | -3.57 | -4.50 | -5.00 |                                      |
| [Ch]Cl-1,4-butanediol (1 : 3) | 313.15 | 410.2 | -4.64 | -3.32 | -4.24 | -4.74 |                                      |
| [Ch]Cl-1,4-butanediol (1 : 3) | 313.15 | 502.8 | -4.41 | -3.11 | -4.02 | -4.54 |                                      |
| [Ch]Cl-1,4-butanediol (1 : 3) | 323.15 | 122.8 | -5.99 | -4.73 | -5.62 | -6.28 |                                      |
| [Ch]Cl-1,4-butanediol (1 : 3) | 323.15 | 218.3 | -5.47 | -4.15 | -5.02 | -5.61 |                                      |
| [Ch]Cl-1,4-butanediol (1 : 3) | 323.15 | 325.2 | -5.05 | -3.75 | -4.61 | -5.18 |                                      |
| [Ch]Cl-1,4-butanediol (1 : 3) | 323.15 | 425.9 | -4.77 | -3.48 | -4.32 | -4.90 |                                      |
| [Ch]Cl-1,4-butanediol (1 : 3) | 323.15 | 525.9 | -4.58 | -3.27 | -4.09 | -4.68 |                                      |
| [Ch]Cl-2,3-butanediol (1 : 3) | 293.15 | 114.3 | -5.78 | -4.18 | -5.33 | -5.38 | Chen et al.<br>(2014) <sup>13</sup>  |

|                                |        |       |       |       |       |       |                                     |
|--------------------------------|--------|-------|-------|-------|-------|-------|-------------------------------------|
| [Ch]Cl-2,3-butanediol (1 : 3)  | 293.15 | 214   | -5.10 | -3.55 | -4.68 | -4.68 |                                     |
| [Ch]Cl-2,3-butanediol (1 : 3)  | 293.15 | 316.6 | -4.70 | -3.16 | -4.26 | -4.26 |                                     |
| [Ch]Cl-2,3-butanediol (1 : 3)  | 293.15 | 407.9 | -4.41 | -2.90 | -3.99 | -4.01 |                                     |
| [Ch]Cl-2,3-butanediol (1 : 3)  | 293.15 | 511.3 | -4.19 | -2.67 | -3.74 | -3.78 |                                     |
| [Ch]Cl-2,3-butanediol (1 : 3)  | 303.15 | 114   | -5.88 | -4.41 | -5.46 | -5.59 |                                     |
| [Ch]Cl-2,3-butanediol (1 : 3)  | 303.15 | 214.6 | -5.15 | -3.77 | -4.81 | -4.89 |                                     |
| [Ch]Cl-2,3-butanediol (1 : 3)  | 303.15 | 315.2 | -4.80 | -3.39 | -4.40 | -4.48 |                                     |
| [Ch]Cl-2,3-butanediol (1 : 3)  | 303.15 | 412.3 | -4.49 | -3.12 | -4.12 | -4.21 |                                     |
| [Ch]Cl-2,3-butanediol (1 : 3)  | 303.15 | 513.4 | -4.28 | -2.89 | -3.88 | -3.98 |                                     |
| [Ch]Cl-2,3-butanediol (1 : 3)  | 313.15 | 119.3 | -5.84 | -4.57 | -5.54 | -5.74 |                                     |
| [Ch]Cl-2,3-butanediol (1 : 3)  | 313.15 | 222.4 | -5.22 | -3.94 | -4.89 | -5.06 |                                     |
| [Ch]Cl-2,3-butanediol (1 : 3)  | 313.15 | 325.5 | -4.84 | -3.56 | -4.49 | -4.66 |                                     |
| [Ch]Cl-2,3-butanediol (1 : 3)  | 313.15 | 424.9 | -4.59 | -3.29 | -4.21 | -4.39 |                                     |
| [Ch]Cl-2,3-butanediol (1 : 3)  | 313.15 | 528.8 | -4.37 | -3.07 | -3.97 | -4.16 |                                     |
| [Ch]Cl-2,3-butanediol (1 : 3)  | 323.15 | 124   | -5.95 | -4.72 | -5.61 | -5.89 |                                     |
| [Ch]Cl-2,3-butanediol (1 : 3)  | 323.15 | 217   | -5.36 | -4.16 | -5.03 | -5.27 |                                     |
| [Ch]Cl-2,3-butanediol (1 : 3)  | 323.15 | 322   | -4.95 | -3.76 | -4.61 | -4.86 |                                     |
| [Ch]Cl-2,3-butanediol (1 : 3)  | 323.15 | 421.5 | -4.69 | -3.49 | -4.33 | -4.58 |                                     |
| [Ch]Cl-2,3-butanediol (1 : 3)  | 323.15 | 514.1 | -4.46 | -3.24 | -4.06 | -4.38 |                                     |
| [Ch]Cl-1,2-propanediol (1 : 3) | 293.15 | 108.5 | -5.71 | -4.52 | -5.66 | -5.83 | Chen et al.<br>(2014) <sup>13</sup> |
| [Ch]Cl-1,2-propanediol (1 : 3) | 293.15 | 204.7 | -5.07 | -3.88 | -5.00 | -5.11 |                                     |
| [Ch]Cl-1,2-propanediol (1 : 3) | 293.15 | 312.2 | -4.63 | -3.45 | -4.56 | -4.65 |                                     |
| [Ch]Cl-1,2-propanediol (1 : 3) | 293.15 | 408.8 | -4.34 | -3.18 | -4.27 | -4.39 |                                     |
| [Ch]Cl-1,2-propanediol (1 : 3) | 293.15 | 514.5 | -4.10 | -2.95 | -4.02 | -4.17 |                                     |
| [Ch]Cl-1,2-propanediol (1 : 3) | 303.15 | 117.5 | -5.88 | -4.66 | -5.71 | -5.95 |                                     |
| [Ch]Cl-1,2-propanediol (1 : 3) | 303.15 | 222.1 | -5.12 | -4.02 | -5.05 | -5.22 |                                     |
| [Ch]Cl-1,2-propanediol (1 : 3) | 303.15 | 317   | -4.78 | -3.66 | -4.68 | -4.84 |                                     |
| [Ch]Cl-1,2-propanediol (1 : 3) | 303.15 | 422   | -4.48 | -3.37 | -4.37 | -4.56 |                                     |



|                                |        |        |       |       |       |       |                                      |
|--------------------------------|--------|--------|-------|-------|-------|-------|--------------------------------------|
| [Ch]Cl-1,2-propanediol (1 : 3) | 303.15 | 517    | -4.27 | -3.16 | -4.15 | -4.37 |                                      |
| [Ch]Cl-1,2-propanediol (1 : 3) | 313.15 | 125.4  | -6.03 | -4.79 | -5.76 | -6.07 |                                      |
| [Ch]Cl-1,2-propanediol (1 : 3) | 313.15 | 217.8  | -5.43 | -4.24 | -5.19 | -5.45 |                                      |
| [Ch]Cl-1,2-propanediol (1 : 3) | 313.15 | 317.6  | -5.01 | -3.86 | -4.79 | -5.05 |                                      |
| [Ch]Cl-1,2-propanediol (1 : 3) | 313.15 | 420.5  | -4.68 | -3.58 | -4.49 | -4.77 |                                      |
| [Ch]Cl-1,2-propanediol (1 : 3) | 313.15 | 515.4  | -4.47 | -3.37 | -4.27 | -4.57 |                                      |
| [Ch]Cl-1,2-propanediol (1 : 3) | 323.15 | 123    | -6.27 | -5.00 | -5.88 | -6.27 |                                      |
| [Ch]Cl-1,2-propanediol (1 : 3) | 323.15 | 236    | -5.55 | -4.34 | -5.21 | -5.54 |                                      |
| [Ch]Cl-1,2-propanediol (1 : 3) | 323.15 | 334.3  | -5.13 | -3.99 | -4.84 | -5.18 |                                      |
| [Ch]Cl-1,2-propanediol (1 : 3) | 323.15 | 426.3  | -4.85 | -3.75 | -4.58 | -4.94 |                                      |
| [Ch]Cl-1,2-propanediol (1 : 3) | 323.15 | 524.7  | -4.67 | -3.54 | -4.36 | -4.73 |                                      |
| [Ch]Cl-DEG (1 : 3)             | 303.15 | 564.2  | -4.01 | -2.66 | -3.64 | -4.00 | Haider et al.<br>(2018) <sup>9</sup> |
| [Ch]Cl-DEG (1 : 3)             | 303.15 | 678.3  | -3.83 | -2.48 | -3.43 | -3.80 |                                      |
| [Ch]Cl-DEG (1 : 3)             | 303.15 | 735.6  | -3.75 | -2.39 | -3.34 | -3.71 |                                      |
| [Ch]Cl-DEG (1 : 3)             | 303.15 | 865.3  | -3.59 | -2.23 | -3.15 | -3.53 |                                      |
| [Ch]Cl-DEG (1 : 3)             | 303.15 | 934.2  | -3.41 | -2.15 | -3.06 | -3.44 |                                      |
| [Ch]Cl-DEG (1 : 3)             | 303.15 | 1112   | -3.35 | -1.98 | -2.86 | -3.25 |                                      |
| [TBA]Br-EG (1 : 3)             | 303.15 | 502.5  | -4.09 | -2.84 | -3.82 | -3.81 | Haider et al.<br>(2018) <sup>9</sup> |
| [TBA]Br-EG (1 : 3)             | 303.15 | 744.4  | -3.51 | -2.48 | -3.42 | -3.40 |                                      |
| [TBA]Br-EG (1 : 3)             | 303.15 | 805.8  | -3.43 | -2.41 | -3.34 | -3.32 |                                      |
| [TBA]Br-EG (1 : 3)             | 303.15 | 895.2  | -3.32 | -2.31 | -3.23 | -3.20 |                                      |
| [TBA]Br-EG (1 : 3)             | 303.15 | 1085.6 | -3.14 | -2.14 | -3.03 | -3.00 |                                      |
| [TBA]Br-EG (1 : 3)             | 303.15 | 1249.1 | -2.96 | -2.02 | -2.88 | -2.86 |                                      |
| [TBA]Br-DEG (1 : 3)            | 303.15 | 688.5  | -3.26 | -2.09 | -3.04 | -3.30 | Haider et al.<br>(2018) <sup>9</sup> |
| [TBA]Br-DEG (1 : 3)            | 303.15 | 896.3  | -2.83 | -1.86 | -2.78 | -2.99 |                                      |
| [TBA]Br-DEG (1 : 3)            | 303.15 | 1094.6 | -2.57 | -1.69 | -2.58 | -2.76 |                                      |
| [TBA]Br-DEG (1 : 3)            | 303.15 | 1205   | -2.43 | -1.62 | -2.48 | -2.65 |                                      |

|                           |        |       |       |       |       |       |                                   |
|---------------------------|--------|-------|-------|-------|-------|-------|-----------------------------------|
| [TBA]Br-MDA (1 : 3)       | 303.15 | 423.2 | -2.45 | -2.30 | -3.30 | -2.69 | Haider et al. (2018) <sup>9</sup> |
| [TBA]Br-MDA (1 : 3)       | 303.15 | 512.5 | -2.33 | -2.13 | -3.12 | -2.47 |                                   |
| [TBA]Br-MDA (1 : 3)       | 303.15 | 614.1 | -2.15 | -1.97 | -2.94 | -2.26 |                                   |
| [TBA]Br-MDA (1 : 3)       | 303.15 | 732.1 | -1.91 | -1.82 | -2.77 | -2.05 |                                   |
| [TBA]Br-MDA (1 : 3)       | 303.15 | 816.7 | -1.79 | -1.73 | -2.66 | -1.91 |                                   |
| [TBA]Br-MDA (1 : 3)       | 303.15 | 1000  | -1.59 | -1.57 | -2.47 | -1.64 |                                   |
| [ACh]Cl-Imidazole (1 : 3) | 303.15 | 52.8  | -5.91 | -5.08 | -6.14 | -6.02 | Li et al. (2018) <sup>1</sup>     |
| [ACh]Cl-Imidazole (1 : 3) | 303.15 | 91    | -5.22 | -4.53 | -5.59 | -5.56 |                                   |
| [ACh]Cl-Imidazole (1 : 3) | 303.15 | 200.3 | -4.57 | -3.75 | -4.79 | -4.73 |                                   |
| [ACh]Cl-Imidazole (1 : 3) | 303.15 | 291.4 | -4.20 | -3.38 | -4.40 | -4.34 |                                   |
| [ACh]Cl-Imidazole (1 : 3) | 303.15 | 385.4 | -3.98 | -3.10 | -4.10 | -4.06 |                                   |
| [ACh]Cl-Imidazole (1 : 3) | 303.15 | 478.6 | -3.75 | -2.88 | -3.87 | -3.86 |                                   |
| [ACh]Cl-Imidazole (1 : 3) | 303.15 | 567.6 | -3.59 | -2.71 | -3.69 | -3.70 |                                   |
| [ACh]Cl-Imidazole (1 : 3) | 313.15 | 29.2  | -6.03 | -5.90 | -6.89 | -6.53 |                                   |
| [ACh]Cl-Imidazole (1 : 3) | 313.15 | 59.9  | -5.68 | -5.19 | -6.16 | -6.09 |                                   |
| [ACh]Cl-Imidazole (1 : 3) | 313.15 | 87.8  | -5.34 | -4.80 | -5.78 | -5.76 |                                   |
| [ACh]Cl-Imidazole (1 : 3) | 313.15 | 140.2 | -4.99 | -4.34 | -5.30 | -5.28 |                                   |
| [ACh]Cl-Imidazole (1 : 3) | 313.15 | 233.6 | -4.57 | -3.83 | -4.77 | -4.74 |                                   |
| [ACh]Cl-Imidazole (1 : 3) | 313.15 | 337   | -4.28 | -3.46 | -4.39 | -4.37 |                                   |
| [ACh]Cl-Imidazole (1 : 3) | 313.15 | 424.5 | -4.06 | -3.23 | -4.15 | -4.15 |                                   |
| [ACh]Cl-Imidazole (1 : 3) | 313.15 | 522.8 | -3.87 | -3.03 | -3.92 | -3.95 |                                   |
| [ACh]Cl-Imidazole (1 : 3) | 313.15 | 583.6 | -3.78 | -2.92 | -3.80 | -3.84 |                                   |
| [ACh]Cl-Imidazole (1 : 3) | 323.15 | 26.3  | -6.57 | -6.23 | -7.13 | -6.73 |                                   |
| [ACh]Cl-Imidazole (1 : 3) | 323.15 | 58    | -5.88 | -5.44 | -6.33 | -6.26 |                                   |
| [ACh]Cl-Imidazole (1 : 3) | 323.15 | 87.5  | -5.63 | -5.02 | -5.92 | -5.92 |                                   |
| [ACh]Cl-Imidazole (1 : 3) | 323.15 | 139.1 | -5.22 | -4.56 | -5.45 | -5.45 |                                   |
| [ACh]Cl-Imidazole (1 : 3) | 323.15 | 238.7 | -4.80 | -4.02 | -4.89 | -4.87 |                                   |

|                           |        |       |       |       |       |       |                                 |
|---------------------------|--------|-------|-------|-------|-------|-------|---------------------------------|
| [ACh]Cl-Imidazole (1 : 3) | 323.15 | 337.1 | -4.47 | -3.68 | -4.53 | -4.53 |                                 |
| [ACh]Cl-Imidazole (1 : 3) | 323.15 | 426   | -4.26 | -3.44 | -4.28 | -4.30 |                                 |
| [ACh]Cl-Imidazole (1 : 3) | 323.15 | 531   | -4.06 | -3.23 | -4.04 | -4.09 |                                 |
| [ACh]Cl-Imidazole (1 : 3) | 323.15 | 587.3 | -3.96 | -3.12 | -3.93 | -3.99 |                                 |
| [ACh]Cl-Imidazole (1 : 3) | 333.15 | 28.6  | -7.13 | -6.34 | -7.17 | -6.82 |                                 |
| [ACh]Cl-Imidazole (1 : 3) | 333.15 | 58.3  | -6.44 | -5.63 | -6.46 | -6.40 |                                 |
| [ACh]Cl-Imidazole (1 : 3) | 333.15 | 87.1  | -6.07 | -5.23 | -6.05 | -6.06 |                                 |
| [ACh]Cl-Imidazole (1 : 3) | 333.15 | 146.1 | -5.57 | -4.71 | -5.52 | -5.54 |                                 |
| [ACh]Cl-Imidazole (1 : 3) | 333.15 | 239.7 | -5.08 | -4.22 | -5.01 | -5.01 |                                 |
| [ACh]Cl-Imidazole (1 : 3) | 333.15 | 354.3 | -4.70 | -3.83 | -4.60 | -4.62 |                                 |
| [ACh]Cl-Imidazole (1 : 3) | 333.15 | 432.2 | -4.49 | -3.63 | -4.39 | -4.43 |                                 |
| [ACh]Cl-Imidazole (1 : 3) | 333.15 | 525.8 | -4.30 | -3.44 | -4.18 | -4.24 |                                 |
| [ACh]Cl-Imidazole (1 : 3) | 333.15 | 591.6 | -4.19 | -3.32 | -4.05 | -4.13 |                                 |
| [Ch]Cl-Guaiacol (1 : 3)   | 293.15 | 51.5  | -6.17 | -4.43 | -5.59 | -6.15 | Liu et al. (2017) <sup>14</sup> |
| [Ch]Cl-Guaiacol (1 : 3)   | 293.15 | 138.1 | -5.20 | -3.45 | -4.58 | -5.27 |                                 |
| [Ch]Cl-Guaiacol (1 : 3)   | 293.15 | 236.7 | -4.67 | -2.90 | -4.02 | -4.70 |                                 |
| [Ch]Cl-Guaiacol (1 : 3)   | 293.15 | 329.2 | -4.34 | -2.57 | -3.67 | -4.36 |                                 |
| [Ch]Cl-Guaiacol (1 : 3)   | 293.15 | 427.5 | -4.08 | -2.30 | -3.39 | -4.11 |                                 |
| [Ch]Cl-Guaiacol (1 : 3)   | 293.15 | 529.4 | -3.84 | -2.09 | -3.16 | -3.90 |                                 |
| [Ch]Cl-Guaiacol (1 : 3)   | 303.15 | 55.3  | -6.21 | -4.61 | -5.67 | -6.23 |                                 |
| [Ch]Cl-Guaiacol (1 : 3)   | 303.15 | 132.3 | -5.40 | -3.73 | -4.78 | -5.45 |                                 |
| [Ch]Cl-Guaiacol (1 : 3)   | 303.15 | 243.8 | -4.80 | -3.12 | -4.15 | -4.81 |                                 |
| [Ch]Cl-Guaiacol (1 : 3)   | 303.15 | 335.5 | -4.48 | -2.80 | -3.81 | -4.49 |                                 |
| [Ch]Cl-Guaiacol (1 : 3)   | 303.15 | 433.8 | -4.23 | -2.54 | -3.53 | -4.24 |                                 |
| [Ch]Cl-Guaiacol (1 : 3)   | 303.15 | 533.2 | -4.03 | -2.33 | -3.31 | -4.04 |                                 |
| [Ch]Cl-Guaiacol (1 : 3)   | 313.15 | 57.5  | -6.38 | -4.79 | -5.77 | -6.34 |                                 |
| [Ch]Cl-Guaiacol (1 : 3)   | 313.15 | 145.7 | -5.50 | -3.86 | -4.82 | -5.49 |                                 |
| [Ch]Cl-Guaiacol (1 : 3)   | 313.15 | 233.2 | -5.04 | -3.39 | -4.33 | -4.99 |                                 |

|                          |        |       |       |       |       |       |                                 |
|--------------------------|--------|-------|-------|-------|-------|-------|---------------------------------|
| [Ch]Cl-Guaiacol (1 : 3)  | 313.15 | 330.3 | -4.68 | -3.04 | -3.97 | -4.64 |                                 |
| [Ch]Cl-Guaiacol (1 : 3)  | 313.15 | 429.6 | -4.41 | -2.77 | -3.69 | -4.39 |                                 |
| [Ch]Cl-Guaiacol (1 : 3)  | 313.15 | 529.4 | -4.20 | -2.56 | -3.46 | -4.18 |                                 |
| [Ch]Cl-Guaiacol (1 : 3)  | 323.15 | 63.1  | -6.57 | -4.91 | -5.80 | -6.39 |                                 |
| [Ch]Cl-Guaiacol (1 : 3)  | 323.15 | 160.6 | -5.55 | -3.97 | -4.85 | -5.51 |                                 |
| [Ch]Cl-Guaiacol (1 : 3)  | 323.15 | 239.9 | -5.17 | -3.57 | -4.43 | -5.09 |                                 |
| [Ch]Cl-Guaiacol (1 : 3)  | 323.15 | 341.4 | -4.79 | -3.21 | -4.06 | -4.74 |                                 |
| [Ch]Cl-Guaiacol (1 : 3)  | 323.15 | 442.6 | -4.54 | -2.95 | -3.78 | -4.49 |                                 |
| [Ch]Cl-Guaiacol (1 : 3)  | 323.15 | 536.5 | -4.36 | -2.76 | -3.57 | -4.30 |                                 |
| [DEA]Cl-Guaiacol (1 : 3) | 293.15 | 45.1  | -6.03 | -4.59 | -5.74 | -5.97 | Liu et al. (2017) <sup>14</sup> |
| [DEA]Cl-Guaiacol (1 : 3) | 293.15 | 137.1 | -5.04 | -3.48 | -4.61 | -5.03 |                                 |
| [DEA]Cl-Guaiacol (1 : 3) | 293.15 | 222.8 | -4.55 | -2.99 | -4.11 | -4.53 |                                 |
| [DEA]Cl-Guaiacol (1 : 3) | 293.15 | 320.6 | -4.17 | -2.62 | -3.73 | -4.16 |                                 |
| [DEA]Cl-Guaiacol (1 : 3) | 293.15 | 414.9 | -3.91 | -2.36 | -3.45 | -3.90 |                                 |
| [DEA]Cl-Guaiacol (1 : 3) | 293.15 | 517.7 | -3.69 | -2.13 | -3.20 | -3.64 |                                 |
| [DEA]Cl-Guaiacol (1 : 3) | 303.15 | 53.9  | -6.03 | -4.66 | -5.72 | -5.97 |                                 |
| [DEA]Cl-Guaiacol (1 : 3) | 303.15 | 133.6 | -5.12 | -3.75 | -4.80 | -5.19 |                                 |
| [DEA]Cl-Guaiacol (1 : 3) | 303.15 | 241.5 | -4.58 | -3.15 | -4.18 | -4.59 |                                 |
| [DEA]Cl-Guaiacol (1 : 3) | 303.15 | 339.1 | -4.25 | -2.81 | -3.82 | -4.25 |                                 |
| [DEA]Cl-Guaiacol (1 : 3) | 303.15 | 428.8 | -4.02 | -2.57 | -3.57 | -4.00 |                                 |
| [DEA]Cl-Guaiacol (1 : 3) | 303.15 | 513.5 | -3.84 | -2.39 | -3.37 | -3.79 |                                 |
| [DEA]Cl-Guaiacol (1 : 3) | 313.15 | 59.2  | -6.03 | -4.79 | -5.77 | -6.03 |                                 |
| [DEA]Cl-Guaiacol (1 : 3) | 313.15 | 182.9 | -4.99 | -3.66 | -4.62 | -5.00 |                                 |
| [DEA]Cl-Guaiacol (1 : 3) | 313.15 | 271.2 | -4.61 | -3.26 | -4.20 | -4.61 |                                 |
| [DEA]Cl-Guaiacol (1 : 3) | 313.15 | 357.5 | -4.34 | -2.98 | -3.91 | -4.33 |                                 |
| [DEA]Cl-Guaiacol (1 : 3) | 313.15 | 436.4 | -4.14 | -2.78 | -3.69 | -4.12 |                                 |
| [DEA]Cl-Guaiacol (1 : 3) | 313.15 | 524.6 | -3.97 | -2.60 | -3.49 | -3.91 |                                 |
| [DEA]Cl-Guaiacol (1 : 3) | 323.15 | 56.6  | -6.27 | -5.05 | -5.94 | -6.17 |                                 |

|                          |        |       |       |       |       |       |                                 |
|--------------------------|--------|-------|-------|-------|-------|-------|---------------------------------|
| [DEA]Cl-Guaiacol (1 : 3) | 323.15 | 143.4 | -5.36 | -4.11 | -5.00 | -5.36 |                                 |
| [DEA]Cl-Guaiacol (1 : 3) | 323.15 | 246   | -4.83 | -3.57 | -4.44 | -4.82 |                                 |
| [DEA]Cl-Guaiacol (1 : 3) | 323.15 | 331.9 | -4.55 | -3.27 | -4.12 | -4.53 |                                 |
| [DEA]Cl-Guaiacol (1 : 3) | 323.15 | 428.9 | -4.29 | -3.01 | -3.85 | -4.27 |                                 |
| [DEA]Cl-Guaiacol (1 : 3) | 323.15 | 525.4 | -4.09 | -2.81 | -3.62 | -4.03 |                                 |
| [ACh]Cl-Guaiacol (1 : 3) | 293.15 | 53.7  | -5.95 | -4.37 | -5.52 | -5.93 | Liu et al. (2017) <sup>14</sup> |
| [ACh]Cl-Guaiacol (1 : 3) | 293.15 | 144.3 | -5.02 | -3.38 | -4.51 | -5.01 |                                 |
| [ACh]Cl-Guaiacol (1 : 3) | 293.15 | 234.1 | -4.50 | -2.89 | -4.01 | -4.49 |                                 |
| [ACh]Cl-Guaiacol (1 : 3) | 293.15 | 331.7 | -4.14 | -2.54 | -3.64 | -4.14 |                                 |
| [ACh]Cl-Guaiacol (1 : 3) | 293.15 | 428.8 | -3.88 | -2.28 | -3.37 | -3.90 |                                 |
| [ACh]Cl-Guaiacol (1 : 3) | 293.15 | 528.6 | -3.67 | -2.07 | -3.14 | -3.71 |                                 |
| [ACh]Cl-Guaiacol (1 : 3) | 303.15 | 53.8  | -6.07 | -4.61 | -5.67 | -6.06 |                                 |
| [ACh]Cl-Guaiacol (1 : 3) | 303.15 | 139.6 | -5.17 | -3.65 | -4.70 | -5.18 |                                 |
| [ACh]Cl-Guaiacol (1 : 3) | 303.15 | 227.1 | -4.68 | -3.16 | -4.20 | -4.66 |                                 |
| [ACh]Cl-Guaiacol (1 : 3) | 303.15 | 329.5 | -4.31 | -2.79 | -3.81 | -4.29 |                                 |
| [ACh]Cl-Guaiacol (1 : 3) | 303.15 | 431.7 | -4.05 | -2.52 | -3.52 | -4.03 |                                 |
| [ACh]Cl-Guaiacol (1 : 3) | 303.15 | 531.2 | -3.84 | -2.31 | -3.29 | -3.84 |                                 |
| [ACh]Cl-Guaiacol (1 : 3) | 313.15 | 54.1  | -6.27 | -4.83 | -5.80 | -6.18 |                                 |
| [ACh]Cl-Guaiacol (1 : 3) | 313.15 | 147.8 | -5.28 | -3.82 | -4.78 | -5.25 |                                 |
| [ACh]Cl-Guaiacol (1 : 3) | 313.15 | 235   | -4.82 | -3.35 | -4.30 | -4.76 |                                 |
| [ACh]Cl-Guaiacol (1 : 3) | 313.15 | 338   | -4.45 | -2.99 | -3.92 | -4.40 |                                 |
| [ACh]Cl-Guaiacol (1 : 3) | 313.15 | 434.5 | -4.20 | -2.74 | -3.65 | -4.16 |                                 |
| [ACh]Cl-Guaiacol (1 : 3) | 313.15 | 535.3 | -3.99 | -2.53 | -3.42 | -3.97 |                                 |
| [ACh]Cl-Guaiacol (1 : 3) | 323.15 | 55.9  | -6.32 | -5.00 | -5.90 | -6.27 |                                 |
| [ACh]Cl-Guaiacol (1 : 3) | 323.15 | 143.5 | -5.38 | -4.06 | -4.94 | -5.40 |                                 |
| [ACh]Cl-Guaiacol (1 : 3) | 323.15 | 239.4 | -4.89 | -3.54 | -4.41 | -4.87 |                                 |
| [ACh]Cl-Guaiacol (1 : 3) | 323.15 | 337.9 | -4.56 | -3.20 | -4.05 | -4.52 |                                 |
| [ACh]Cl-Guaiacol (1 : 3) | 323.15 | 438   | -4.31 | -2.94 | -3.77 | -4.28 |                                 |

|                          |        |       |       |       |       |       |                                     |
|--------------------------|--------|-------|-------|-------|-------|-------|-------------------------------------|
| [ACh]Cl-Guaiacol (1 : 3) | 323.15 | 533   | -4.12 | -2.74 | -3.56 | -4.09 |                                     |
| [ACh]Cl-LEV (1 : 3)      | 303.15 | 65.7  | -5.20 | -4.83 | -5.89 | -5.36 | Deng et al.<br>(2016) <sup>15</sup> |
| [ACh]Cl-LEV (1 : 3)      | 303.15 | 120.4 | -4.66 | -4.23 | -5.28 | -4.83 |                                     |
| [ACh]Cl-LEV (1 : 3)      | 303.15 | 200   | -4.21 | -3.72 | -4.76 | -4.31 |                                     |
| [ACh]Cl-LEV (1 : 3)      | 303.15 | 283.4 | -3.87 | -3.37 | -4.40 | -3.95 |                                     |
| [ACh]Cl-LEV (1 : 3)      | 303.15 | 388.3 | -3.57 | -3.06 | -4.06 | -3.63 |                                     |
| [ACh]Cl-LEV (1 : 3)      | 303.15 | 474.2 | -3.39 | -2.86 | -3.85 | -3.42 |                                     |
| [ACh]Cl-LEV (1 : 3)      | 303.15 | 542.7 | -3.26 | -2.72 | -3.70 | -3.27 |                                     |
| [ACh]Cl-LEV (1 : 3)      | 313.15 | 72.3  | -5.40 | -4.96 | -5.93 | -5.49 |                                     |
| [ACh]Cl-LEV (1 : 3)      | 313.15 | 132.3 | -4.88 | -4.36 | -5.32 | -4.94 |                                     |
| [ACh]Cl-LEV (1 : 3)      | 313.15 | 215.1 | -4.37 | -3.87 | -4.82 | -4.45 |                                     |
| [ACh]Cl-LEV (1 : 3)      | 313.15 | 315.4 | -4.02 | -3.49 | -4.42 | -4.06 |                                     |
| [ACh]Cl-LEV (1 : 3)      | 313.15 | 410.2 | -3.79 | -3.23 | -4.14 | -3.79 |                                     |
| [ACh]Cl-LEV (1 : 3)      | 313.15 | 511.8 | -3.58 | -3.00 | -3.90 | -3.55 |                                     |
| [ACh]Cl-LEV (1 : 3)      | 313.15 | 570.1 | -3.47 | -2.90 | -3.79 | -3.43 |                                     |
| [ACh]Cl-LEV (1 : 3)      | 323.15 | 77.5  | -5.66 | -5.10 | -5.99 | -5.62 |                                     |
| [ACh]Cl-LEV (1 : 3)      | 323.15 | 129.9 | -5.15 | -4.58 | -5.47 | -5.15 |                                     |
| [ACh]Cl-LEV (1 : 3)      | 323.15 | 220.1 | -4.64 | -4.05 | -4.92 | -4.61 |                                     |
| [ACh]Cl-LEV (1 : 3)      | 323.15 | 317.1 | -4.28 | -3.69 | -4.54 | -4.24 |                                     |
| [ACh]Cl-LEV (1 : 3)      | 323.15 | 414.7 | -4.01 | -3.42 | -4.26 | -3.97 |                                     |
| [ACh]Cl-LEV (1 : 3)      | 323.15 | 512.3 | -3.81 | -3.21 | -4.03 | -3.74 |                                     |
| [ACh]Cl-LEV (1 : 3)      | 323.15 | 576.4 | -3.69 | -3.09 | -3.90 | -3.61 |                                     |
| [ACh]Cl-LEV (1 : 3)      | 333.15 | 83    | -5.68 | -5.22 | -6.04 | -5.73 |                                     |
| [ACh]Cl-LEV (1 : 3)      | 333.15 | 133.5 | -5.24 | -4.74 | -5.55 | -5.29 |                                     |
| [ACh]Cl-LEV (1 : 3)      | 333.15 | 223.6 | -4.78 | -4.23 | -5.02 | -4.77 |                                     |
| [ACh]Cl-LEV (1 : 3)      | 333.15 | 320.6 | -4.45 | -3.87 | -4.65 | -4.41 |                                     |
| [ACh]Cl-LEV (1 : 3)      | 333.15 | 415.2 | -4.20 | -3.61 | -4.37 | -4.14 |                                     |
| [ACh]Cl-LEV (1 : 3)      | 333.15 | 513.3 | -4.00 | -3.40 | -4.14 | -3.91 |                                     |

|                     |        |       |       |       |       |       |                                     |
|---------------------|--------|-------|-------|-------|-------|-------|-------------------------------------|
| [ACh]CI-LEV (1 : 3) | 333.15 | 571.6 | -3.90 | -3.29 | -4.02 | -3.79 |                                     |
| [TEA]CI-LEV (1 : 3) | 303.15 | 66.1  | -5.43 | -4.61 | -5.67 | -5.51 | Deng et al.<br>(2016) <sup>15</sup> |
| [TEA]CI-LEV (1 : 3) | 303.15 | 125.6 | -4.80 | -3.97 | -5.02 | -4.93 |                                     |
| [TEA]CI-LEV (1 : 3) | 303.15 | 211.6 | -4.29 | -3.46 | -4.49 | -4.38 |                                     |
| [TEA]CI-LEV (1 : 3) | 303.15 | 302.8 | -3.97 | -3.11 | -4.13 | -4.01 |                                     |
| [TEA]CI-LEV (1 : 3) | 303.15 | 404.1 | -3.70 | -2.83 | -3.83 | -3.71 |                                     |
| [TEA]CI-LEV (1 : 3) | 303.15 | 500.2 | -3.49 | -2.62 | -3.61 | -3.47 |                                     |
| [TEA]CI-LEV (1 : 3) | 303.15 | 561.6 | -3.38 | -2.51 | -3.49 | -3.33 |                                     |
| [TEA]CI-LEV (1 : 3) | 313.15 | 77.6  | -5.57 | -4.68 | -5.65 | -5.58 |                                     |
| [TEA]CI-LEV (1 : 3) | 313.15 | 131.8 | -5.04 | -4.15 | -5.12 | -5.09 |                                     |
| [TEA]CI-LEV (1 : 3) | 313.15 | 219.8 | -4.55 | -3.65 | -4.60 | -4.55 |                                     |
| [TEA]CI-LEV (1 : 3) | 313.15 | 316.9 | -4.17 | -3.29 | -4.22 | -4.18 |                                     |
| [TEA]CI-LEV (1 : 3) | 313.15 | 416.9 | -3.90 | -3.02 | -3.94 | -3.89 |                                     |
| [TEA]CI-LEV (1 : 3) | 313.15 | 516.4 | -3.68 | -2.81 | -3.71 | -3.65 |                                     |
| [TEA]CI-LEV (1 : 3) | 313.15 | 581.3 | -3.56 | -2.70 | -3.59 | -3.51 |                                     |
| [TEA]CI-LEV (1 : 3) | 323.15 | 78    | -5.66 | -4.89 | -5.78 | -5.76 |                                     |
| [TEA]CI-LEV (1 : 3) | 323.15 | 144.1 | -5.07 | -4.28 | -5.16 | -5.19 |                                     |
| [TEA]CI-LEV (1 : 3) | 323.15 | 229.1 | -4.61 | -3.82 | -4.69 | -4.70 |                                     |
| [TEA]CI-LEV (1 : 3) | 323.15 | 325.9 | -4.26 | -3.47 | -4.32 | -4.34 |                                     |
| [TEA]CI-LEV (1 : 3) | 323.15 | 421.6 | -4.01 | -3.22 | -4.05 | -4.07 |                                     |
| [TEA]CI-LEV (1 : 3) | 323.15 | 526   | -3.80 | -3.00 | -3.82 | -3.82 |                                     |
| [TEA]CI-LEV (1 : 3) | 323.15 | 585.4 | -3.70 | -2.90 | -3.70 | -3.69 |                                     |
| [TEA]CI-LEV (1 : 3) | 333.15 | 84    | -5.88 | -5.01 | -5.83 | -5.87 |                                     |
| [TEA]CI-LEV (1 : 3) | 333.15 | 140.7 | -5.30 | -4.50 | -5.31 | -5.38 |                                     |
| [TEA]CI-LEV (1 : 3) | 333.15 | 228.8 | -4.78 | -4.02 | -4.81 | -4.88 |                                     |
| [TEA]CI-LEV (1 : 3) | 333.15 | 331.2 | -4.41 | -3.65 | -4.43 | -4.50 |                                     |
| [TEA]CI-LEV (1 : 3) | 333.15 | 429.2 | -4.15 | -3.39 | -4.15 | -4.23 |                                     |
| [TEA]CI-LEV (1 : 3) | 333.15 | 529.2 | -3.94 | -3.19 | -3.93 | -3.99 |                                     |

|                     |        |       |       |       |       |       |                                     |
|---------------------|--------|-------|-------|-------|-------|-------|-------------------------------------|
| [TEA]Cl-LEV (1 : 3) | 333.15 | 583.3 | -3.84 | -3.09 | -3.83 | -3.87 |                                     |
| [TEA]Br-LEV (1 : 3) | 303.15 | 68.7  | -5.50 | -4.52 | -5.58 | -5.50 | Deng et al.<br>(2016) <sup>15</sup> |
| [TEA]Br-LEV (1 : 3) | 303.15 | 122.4 | -4.92 | -3.95 | -5.00 | -4.98 |                                     |
| [TEA]Br-LEV (1 : 3) | 303.15 | 210.3 | -4.41 | -3.42 | -4.45 | -4.43 |                                     |
| [TEA]Br-LEV (1 : 3) | 303.15 | 305.1 | -4.03 | -3.06 | -4.08 | -4.04 |                                     |
| [TEA]Br-LEV (1 : 3) | 303.15 | 402.4 | -3.76 | -2.79 | -3.79 | -3.75 |                                     |
| [TEA]Br-LEV (1 : 3) | 303.15 | 500.5 | -3.55 | -2.58 | -3.57 | -3.50 |                                     |
| [TEA]Br-LEV (1 : 3) | 303.15 | 564.4 | -3.43 | -2.47 | -3.44 | -3.36 |                                     |
| [TEA]Br-LEV (1 : 3) | 313.15 | 84.2  | -5.38 | -4.55 | -5.52 | -5.46 |                                     |
| [TEA]Br-LEV (1 : 3) | 313.15 | 139.1 | -4.95 | -4.05 | -5.01 | -4.99 |                                     |
| [TEA]Br-LEV (1 : 3) | 313.15 | 230.1 | -4.47 | -3.55 | -4.50 | -4.47 |                                     |
| [TEA]Br-LEV (1 : 3) | 313.15 | 329.1 | -4.13 | -3.20 | -4.14 | -4.10 |                                     |
| [TEA]Br-LEV (1 : 3) | 313.15 | 428.9 | -3.88 | -2.95 | -3.86 | -3.82 |                                     |
| [TEA]Br-LEV (1 : 3) | 313.15 | 525.9 | -3.69 | -2.75 | -3.65 | -3.59 |                                     |
| [TEA]Br-LEV (1 : 3) | 313.15 | 587.7 | -3.58 | -2.65 | -3.53 | -3.45 |                                     |
| [TEA]Br-LEV (1 : 3) | 323.15 | 83.1  | -5.71 | -4.77 | -5.66 | -5.59 |                                     |
| [TEA]Br-LEV (1 : 3) | 323.15 | 138.5 | -5.20 | -4.26 | -5.15 | -5.12 |                                     |
| [TEA]Br-LEV (1 : 3) | 323.15 | 236.2 | -4.67 | -3.74 | -4.60 | -4.58 |                                     |
| [TEA]Br-LEV (1 : 3) | 323.15 | 323.8 | -4.35 | -3.43 | -4.28 | -4.25 |                                     |
| [TEA]Br-LEV (1 : 3) | 323.15 | 423.9 | -4.08 | -3.16 | -4.00 | -3.97 |                                     |
| [TEA]Br-LEV (1 : 3) | 323.15 | 528.3 | -3.87 | -2.95 | -3.77 | -3.71 |                                     |
| [TEA]Br-LEV (1 : 3) | 323.15 | 578.8 | -3.77 | -2.86 | -3.67 | -3.60 |                                     |
| [TEA]Br-LEV (1 : 3) | 333.15 | 81.8  | -5.81 | -4.98 | -5.80 | -5.72 |                                     |
| [TEA]Br-LEV (1 : 3) | 333.15 | 141   | -5.28 | -4.44 | -5.25 | -5.22 |                                     |
| [TEA]Br-LEV (1 : 3) | 333.15 | 233.4 | -4.79 | -3.94 | -4.74 | -4.71 |                                     |
| [TEA]Br-LEV (1 : 3) | 333.15 | 327.9 | -4.47 | -3.61 | -4.38 | -4.36 |                                     |
| [TEA]Br-LEV (1 : 3) | 333.15 | 429.6 | -4.19 | -3.34 | -4.10 | -4.07 |                                     |
| [TEA]Br-LEV (1 : 3) | 333.15 | 529.4 | -3.99 | -3.14 | -3.88 | -3.83 |                                     |



|                     |        |       |       |       |       |       |                                     |
|---------------------|--------|-------|-------|-------|-------|-------|-------------------------------------|
| [TEA]Br-LEV (1 : 3) | 333.15 | 587.8 | -3.90 | -3.04 | -3.77 | -3.70 |                                     |
| [TBA]Cl-LEV (1 : 3) | 303.15 | 63.2  | -5.24 | -4.51 | -5.57 | -5.07 | Deng et al.<br>(2016) <sup>15</sup> |
| [TBA]Cl-LEV (1 : 3) | 303.15 | 118.8 | -4.62 | -3.89 | -4.94 | -4.54 |                                     |
| [TBA]Cl-LEV (1 : 3) | 303.15 | 200.6 | -4.12 | -3.38 | -4.41 | -4.03 |                                     |
| [TBA]Cl-LEV (1 : 3) | 303.15 | 293   | -3.73 | -3.01 | -4.03 | -3.65 |                                     |
| [TBA]Cl-LEV (1 : 3) | 303.15 | 389.8 | -3.45 | -2.73 | -3.74 | -3.36 |                                     |
| [TBA]Cl-LEV (1 : 3) | 303.15 | 494.3 | -3.22 | -2.51 | -3.50 | -3.10 |                                     |
| [TBA]Cl-LEV (1 : 3) | 303.15 | 559.1 | -3.09 | -2.40 | -3.37 | -2.96 |                                     |
| [TBA]Cl-LEV (1 : 3) | 313.15 | 69.7  | -5.13 | -4.64 | -5.62 | -5.20 |                                     |
| [TBA]Cl-LEV (1 : 3) | 313.15 | 127.3 | -4.61 | -4.05 | -5.01 | -4.69 |                                     |
| [TBA]Cl-LEV (1 : 3) | 313.15 | 210.9 | -4.16 | -3.55 | -4.50 | -4.19 |                                     |
| [TBA]Cl-LEV (1 : 3) | 313.15 | 310   | -3.82 | -3.17 | -4.11 | -3.80 |                                     |
| [TBA]Cl-LEV (1 : 3) | 313.15 | 409.1 | -3.55 | -2.91 | -3.82 | -3.52 |                                     |
| [TBA]Cl-LEV (1 : 3) | 313.15 | 509.6 | -3.34 | -2.70 | -3.60 | -3.28 |                                     |
| [TBA]Cl-LEV (1 : 3) | 313.15 | 578.6 | -3.21 | -2.58 | -3.46 | -3.14 |                                     |
| [TBA]Cl-LEV (1 : 3) | 323.15 | 79.1  | -5.38 | -4.73 | -5.62 | -5.29 |                                     |
| [TBA]Cl-LEV (1 : 3) | 323.15 | 131.6 | -4.91 | -4.22 | -5.11 | -4.84 |                                     |
| [TBA]Cl-LEV (1 : 3) | 323.15 | 229.6 | -4.34 | -3.67 | -4.54 | -4.30 |                                     |
| [TBA]Cl-LEV (1 : 3) | 323.15 | 323.4 | -4.00 | -3.34 | -4.19 | -3.96 |                                     |
| [TBA]Cl-LEV (1 : 3) | 323.15 | 424.2 | -3.73 | -3.07 | -3.91 | -3.68 |                                     |
| [TBA]Cl-LEV (1 : 3) | 323.15 | 524.4 | -3.52 | -2.87 | -3.69 | -3.45 |                                     |
| [TBA]Cl-LEV (1 : 3) | 323.15 | 591.6 | -3.40 | -2.75 | -3.56 | -3.30 |                                     |
| [TBA]Cl-LEV (1 : 3) | 333.15 | 85    | -5.52 | -4.85 | -5.67 | -5.40 |                                     |
| [TBA]Cl-LEV (1 : 3) | 333.15 | 144.5 | -4.98 | -4.33 | -5.13 | -4.93 |                                     |
| [TBA]Cl-LEV (1 : 3) | 333.15 | 236.5 | -4.49 | -3.84 | -4.63 | -4.44 |                                     |
| [TBA]Cl-LEV (1 : 3) | 333.15 | 335.5 | -4.15 | -3.49 | -4.27 | -4.10 |                                     |
| [TBA]Cl-LEV (1 : 3) | 333.15 | 431.7 | -3.89 | -3.25 | -4.01 | -3.84 |                                     |
| [TBA]Cl-LEV (1 : 3) | 333.15 | 533   | -3.67 | -3.04 | -3.79 | -3.60 |                                     |

|                       |        |       |       |       |       |       |                                  |
|-----------------------|--------|-------|-------|-------|-------|-------|----------------------------------|
| [TBA]Cl-LEV (1 : 3)   | 333.15 | 589.8 | -3.56 | -2.95 | -3.68 | -3.48 |                                  |
| [TBA]Br-LEV (1 : 3)   | 303.15 | 70.2  | -5.19 | -4.35 | -5.41 | -5.23 | Deng et al. (2016) <sup>15</sup> |
| [TBA]Br-LEV (1 : 3)   | 303.15 | 122.9 | -4.61 | -3.80 | -4.85 | -4.75 |                                  |
| [TBA]Br-LEV (1 : 3)   | 303.15 | 206.2 | -4.12 | -3.29 | -4.33 | -4.24 |                                  |
| [TBA]Br-LEV (1 : 3)   | 303.15 | 301.7 | -3.75 | -2.93 | -3.95 | -3.86 |                                  |
| [TBA]Br-LEV (1 : 3)   | 303.15 | 401.5 | -3.47 | -2.66 | -3.66 | -3.56 |                                  |
| [TBA]Br-LEV (1 : 3)   | 303.15 | 500.4 | -3.26 | -2.45 | -3.44 | -3.32 |                                  |
| [TBA]Br-LEV (1 : 3)   | 303.15 | 568.2 | -3.14 | -2.34 | -3.31 | -3.16 |                                  |
| [TBA]Br-LEV (1 : 3)   | 313.15 | 82.6  | -5.20 | -4.41 | -5.39 | -5.23 |                                  |
| [TBA]Br-LEV (1 : 3)   | 313.15 | 198   | -4.33 | -3.55 | -4.51 | -4.42 |                                  |
| [TBA]Br-LEV (1 : 3)   | 313.15 | 290.6 | -3.95 | -3.18 | -4.12 | -4.04 |                                  |
| [TBA]Br-LEV (1 : 3)   | 313.15 | 400.4 | -3.63 | -2.87 | -3.79 | -3.71 |                                  |
| [TBA]Br-LEV (1 : 3)   | 313.15 | 499.9 | -3.41 | -2.66 | -3.57 | -3.46 |                                  |
| [TBA]Br-LEV (1 : 3)   | 313.15 | 568.4 | -3.29 | -2.54 | -3.43 | -3.30 |                                  |
| [TBA]Br-LEV (1 : 3)   | 323.15 | 101.1 | -5.19 | -4.42 | -5.31 | -5.19 |                                  |
| [TBA]Br-LEV (1 : 3)   | 323.15 | 201.4 | -4.57 | -3.74 | -4.62 | -4.53 |                                  |
| [TBA]Br-LEV (1 : 3)   | 323.15 | 306.9 | -4.11 | -3.33 | -4.19 | -4.11 |                                  |
| [TBA]Br-LEV (1 : 3)   | 323.15 | 402.3 | -3.83 | -3.07 | -3.91 | -3.83 |                                  |
| [TBA]Br-LEV (1 : 3)   | 323.15 | 502.9 | -3.60 | -2.86 | -3.68 | -3.58 |                                  |
| [TBA]Br-LEV (1 : 3)   | 323.15 | 566.6 | -3.48 | -2.74 | -3.55 | -3.44 |                                  |
| [TBA]Br-LEV (1 : 3)   | 333.15 | 85.3  | -5.57 | -4.78 | -5.60 | -5.44 |                                  |
| [TBA]Br-LEV (1 : 3)   | 333.15 | 142.3 | -5.04 | -4.28 | -5.09 | -4.99 |                                  |
| [TBA]Br-LEV (1 : 3)   | 333.15 | 230.7 | -4.52 | -3.80 | -4.59 | -4.52 |                                  |
| [TBA]Br-LEV (1 : 3)   | 333.15 | 326   | -4.18 | -3.46 | -4.24 | -4.17 |                                  |
| [TBA]Br-LEV (1 : 3)   | 333.15 | 423.2 | -3.91 | -3.21 | -3.97 | -3.90 |                                  |
| [TBA]Br-LEV (1 : 3)   | 333.15 | 523.5 | -3.70 | -3.00 | -3.75 | -3.65 |                                  |
| [TBA]Br-LEV (1 : 3)   | 333.15 | 586.4 | -3.59 | -2.90 | -3.63 | -3.51 |                                  |
| [Ch]Cl-Phenol (1 : 3) | 313.15 | 2100  | -2.44 | -1.34 | -1.97 | -2.60 | Ji et al. (2016) <sup>11</sup>   |

|                                  |        |       |       |       |       |       |                                 |
|----------------------------------|--------|-------|-------|-------|-------|-------|---------------------------------|
| [Ch]Cl-Phenol (1 : 3)            | 313.15 | 3660  | -1.99 | -1.02 | -1.37 | -2.13 |                                 |
| [TMA]Cl-Phenol (1 : 3)           | 313.15 | 2360  | -2.36 | -1.19 | -1.77 | -2.68 | Ji et al. (2016) <sup>11</sup>  |
| [TMA]Cl-Phenol (1 : 3)           | 313.15 | 4470  | -1.97 | -0.79 | -1.01 | -2.20 |                                 |
| [TEA]Cl-Phenol (1 : 3)           | 313.15 | 2120  | -2.60 | -1.28 | -1.91 | -2.74 | Ji et al. (2016) <sup>11</sup>  |
| [TEA]Cl-Phenol (1 : 3)           | 313.15 | 3410  | -2.17 | -0.94 | -1.35 | -2.40 |                                 |
| [TBA]Br-HexA (1 : 3)             | 303.15 | 556   | -2.85 | -2.31 | -3.29 | -2.89 | Luo et al. (2021) <sup>10</sup> |
| [TBA]Br-HexA (1 : 3)             | 303.15 | 650   | -2.70 | -2.17 | -3.13 | -2.74 |                                 |
| [TBA]Br-HexA (1 : 3)             | 303.15 | 747   | -2.55 | -2.04 | -2.99 | -2.60 |                                 |
| [TBA]Br-HexA (1 : 3)             | 303.15 | 910   | -2.37 | -1.87 | -2.79 | -2.41 |                                 |
| [TBA]Br-HexA (1 : 3)             | 303.15 | 987   | -2.29 | -1.80 | -2.70 | -2.34 |                                 |
| [TBA]Br-HexA (1 : 3)             | 303.15 | 1090  | -2.18 | -1.71 | -2.60 | -2.24 |                                 |
| [TBA]Br-HexA (1 : 3)             | 303.15 | 1183  | -2.11 | -1.64 | -2.51 | -2.17 |                                 |
| [TBA]Br-HexA (1 : 3)             | 313.15 | 466   | -3.24 | -2.68 | -3.58 | -3.22 |                                 |
| [TBA]Br-HexA (1 : 3)             | 313.15 | 580   | -2.99 | -2.47 | -3.36 | -3.02 |                                 |
| [TBA]Br-HexA (1 : 3)             | 313.15 | 688   | -2.88 | -2.31 | -3.18 | -2.85 |                                 |
| [TBA]Br-HexA (1 : 3)             | 313.15 | 838   | -2.64 | -2.13 | -2.98 | -2.66 |                                 |
| [TBA]Br-HexA (1 : 3)             | 313.15 | 946   | -2.53 | -2.03 | -2.85 | -2.54 |                                 |
| [TBA]Br-HexA (1 : 3)             | 313.15 | 1044  | -2.45 | -1.94 | -2.75 | -2.45 |                                 |
| [TBA]Br-HexA (1 : 3)             | 313.15 | 1146  | -2.36 | -1.86 | -2.65 | -2.36 |                                 |
| [TBA]Br-HexA (1 : 3)             | 323.15 | 502   | -3.37 | -2.79 | -3.61 | -3.31 |                                 |
| [TBA]Br-HexA (1 : 3)             | 323.15 | 644   | -3.14 | -2.56 | -3.36 | -3.07 |                                 |
| [TBA]Br-HexA (1 : 3)             | 323.15 | 748   | -2.92 | -2.42 | -3.20 | -2.92 |                                 |
| [TBA]Br-HexA (1 : 3)             | 323.15 | 861   | -2.81 | -2.29 | -3.05 | -2.78 |                                 |
| [TBA]Br-HexA (1 : 3)             | 323.15 | 977   | -2.67 | -2.18 | -2.92 | -2.66 |                                 |
| [TBA]Br-HexA (1 : 3)             | 323.15 | 1083  | -2.63 | -2.09 | -2.81 | -2.56 |                                 |
| [TBA]Br-HexA (1 : 3)             | 323.15 | 1112  | -2.57 | -2.06 | -2.78 | -2.53 |                                 |
| Betain-1,2-propanediol (1 : 3.5) | 308.15 | 185.5 | -5.40 | -4.08 | -5.09 | -5.31 | He et al. (2022) <sup>16</sup>  |
| Betain-1,2-propanediol (1 : 3.5) | 308.15 | 297.8 | -4.89 | -3.61 | -4.60 | -4.81 |                                 |

|                                  |        |       |       |       |       |       |                                |
|----------------------------------|--------|-------|-------|-------|-------|-------|--------------------------------|
| Betain-1,2-propanediol (1 : 3.5) | 308.15 | 401.5 | -4.55 | -3.31 | -4.28 | -4.53 |                                |
| Betain-1,2-propanediol (1 : 3.5) | 308.15 | 502.3 | -4.34 | -3.09 | -4.03 | -4.34 |                                |
| Betain-1,2-propanediol (1 : 3.5) | 308.15 | 602   | -4.14 | -2.91 | -3.83 | -4.18 |                                |
| Betain-1,2-propanediol (1 : 3.5) | 318.15 | 195   | -5.52 | -4.23 | -5.17 | -5.43 |                                |
| Betain-1,2-propanediol (1 : 3.5) | 318.15 | 313   | -5.01 | -3.76 | -4.68 | -4.94 |                                |
| Betain-1,2-propanediol (1 : 3.5) | 318.15 | 430   | -4.65 | -3.44 | -4.34 | -4.65 |                                |
| Betain-1,2-propanediol (1 : 3.5) | 318.15 | 527.8 | -4.43 | -3.24 | -4.11 | -4.47 |                                |
| Betain-1,2-propanediol (1 : 3.5) | 318.15 | 633   | -4.23 | -3.06 | -3.91 | -4.31 |                                |
| Betain-1,2-propanediol (1 : 3.5) | 328.15 | 204.5 | -5.63 | -4.37 | -5.25 | -5.52 |                                |
| Betain-1,2-propanediol (1 : 3.5) | 328.15 | 327.8 | -5.10 | -3.90 | -4.75 | -5.04 |                                |
| Betain-1,2-propanediol (1 : 3.5) | 328.15 | 442   | -4.73 | -3.60 | -4.43 | -4.76 |                                |
| Betain-1,2-propanediol (1 : 3.5) | 328.15 | 552.5 | -4.52 | -3.38 | -4.18 | -4.57 |                                |
| Betain-1,2-propanediol (1 : 3.5) | 328.15 | 662.8 | -4.31 | -3.20 | -3.98 | -4.40 |                                |
| Betain-1,2-propanediol (1 : 3.5) | 338.15 | 213.5 | -5.71 | -4.50 | -5.32 | -5.61 |                                |
| Betain-1,2-propanediol (1 : 3.5) | 338.15 | 341.8 | -5.19 | -4.03 | -4.82 | -5.14 |                                |
| Betain-1,2-propanediol (1 : 3.5) | 338.15 | 461.3 | -4.82 | -3.73 | -4.50 | -4.87 |                                |
| Betain-1,2-propanediol (1 : 3.5) | 338.15 | 576.3 | -4.60 | -3.51 | -4.25 | -4.67 |                                |
| Betain-1,2-propanediol (1 : 3.5) | 338.15 | 691.8 | -4.38 | -3.32 | -4.05 | -4.50 |                                |
| Betain-1,2-propanediol (1 : 3.5) | 348.15 | 222.3 | -5.81 | -4.62 | -5.38 | -5.71 |                                |
| Betain-1,2-propanediol (1 : 3.5) | 348.15 | 355.5 | -5.26 | -4.15 | -4.89 | -5.24 |                                |
| Betain-1,2-propanediol (1 : 3.5) | 348.15 | 480   | -4.88 | -3.85 | -4.56 | -4.97 |                                |
| Betain-1,2-propanediol (1 : 3.5) | 348.15 | 599.5 | -4.66 | -3.63 | -4.31 | -4.77 |                                |
| Betain-1,2-propanediol (1 : 3.5) | 348.15 | 719.8 | -4.45 | -3.45 | -4.11 | -4.60 |                                |
| Betain-1,2-propanediol (1 : 4)   | 308.15 | 193.8 | -5.36 | -4.05 | -5.07 | -5.22 | He et al. (2022) <sup>16</sup> |
| Betain-1,2-propanediol (1 : 4)   | 308.15 | 303.3 | -4.85 | -3.60 | -4.60 | -4.75 |                                |
| Betain-1,2-propanediol (1 : 4)   | 308.15 | 405.3 | -4.52 | -3.32 | -4.28 | -4.48 |                                |
| Betain-1,2-propanediol (1 : 4)   | 308.15 | 504.5 | -4.33 | -3.10 | -4.04 | -4.29 |                                |
| Betain-1,2-propanediol (1 : 4)   | 308.15 | 605   | -4.12 | -2.92 | -3.84 | -4.14 |                                |

|                                |        |       |       |       |       |       |                                     |
|--------------------------------|--------|-------|-------|-------|-------|-------|-------------------------------------|
| Betain-1,2-propanediol (1 : 4) | 318.15 | 202.8 | -5.50 | -4.20 | -5.17 | -5.34 |                                     |
| Betain-1,2-propanediol (1 : 4) | 318.15 | 317.8 | -4.96 | -3.75 | -4.70 | -4.88 |                                     |
| Betain-1,2-propanediol (1 : 4) | 318.15 | 420   | -4.66 | -3.48 | -4.39 | -4.62 |                                     |
| Betain-1,2-propanediol (1 : 4) | 318.15 | 528.5 | -4.42 | -3.25 | -4.14 | -4.42 |                                     |
| Betain-1,2-propanediol (1 : 4) | 318.15 | 634   | -4.21 | -3.07 | -3.93 | -4.27 |                                     |
| Betain-1,2-propanediol (1 : 4) | 328.15 | 211   | -5.57 | -4.35 | -5.27 | -5.44 |                                     |
| Betain-1,2-propanediol (1 : 4) | 328.15 | 331.8 | -5.05 | -3.89 | -4.79 | -4.98 |                                     |
| Betain-1,2-propanediol (1 : 4) | 328.15 | 438.5 | -4.74 | -3.62 | -4.48 | -4.72 |                                     |
| Betain-1,2-propanediol (1 : 4) | 328.15 | 552   | -4.51 | -3.39 | -4.23 | -4.52 |                                     |
| Betain-1,2-propanediol (1 : 4) | 328.15 | 662.5 | -4.30 | -3.20 | -4.02 | -4.37 |                                     |
| Betain-1,2-propanediol (1 : 4) | 338.15 | 220   | -5.68 | -4.48 | -5.35 | -5.53 |                                     |
| Betain-1,2-propanediol (1 : 4) | 338.15 | 345.5 | -5.13 | -4.03 | -4.87 | -5.08 |                                     |
| Betain-1,2-propanediol (1 : 4) | 338.15 | 456.8 | -4.83 | -3.75 | -4.57 | -4.83 |                                     |
| Betain-1,2-propanediol (1 : 4) | 338.15 | 574.5 | -4.58 | -3.52 | -4.31 | -4.63 |                                     |
| Betain-1,2-propanediol (1 : 4) | 338.15 | 689.8 | -4.37 | -3.34 | -4.10 | -4.47 |                                     |
| Betain-1,2-propanediol (1 : 4) | 348.15 | 225.8 | -5.78 | -4.61 | -5.45 | -5.65 |                                     |
| Betain-1,2-propanediol (1 : 4) | 348.15 | 359   | -5.22 | -4.15 | -4.95 | -5.19 |                                     |
| Betain-1,2-propanediol (1 : 4) | 348.15 | 474.3 | -4.89 | -3.87 | -4.65 | -4.94 |                                     |
| Betain-1,2-propanediol (1 : 4) | 348.15 | 596.8 | -4.65 | -3.64 | -4.39 | -4.74 |                                     |
| Betain-1,2-propanediol (1 : 4) | 348.15 | 716.8 | -4.43 | -3.46 | -4.17 | -4.57 |                                     |
| [Ch]Cl-DEG (1 : 4)             | 293.15 | 110.4 | -5.55 | -4.02 | -5.14 | -5.61 | <u>Li et al. (2014)<sup>7</sup></u> |
| [Ch]Cl-DEG (1 : 4)             | 293.15 | 210.5 | -4.84 | -3.38 | -4.47 | -4.86 |                                     |
| [Ch]Cl-DEG (1 : 4)             | 293.15 | 313.8 | -4.40 | -2.98 | -4.05 | -4.43 |                                     |
| [Ch]Cl-DEG (1 : 4)             | 293.15 | 412.3 | -4.11 | -2.70 | -3.75 | -4.15 |                                     |
| [Ch]Cl-DEG (1 : 4)             | 293.15 | 508.8 | -3.89 | -2.49 | -3.51 | -3.95 |                                     |
| [Ch]Cl-DEG (1 : 4)             | 303.15 | 115.8 | -5.68 | -4.22 | -5.28 | -5.74 |                                     |
| [Ch]Cl-DEG (1 : 4)             | 303.15 | 218.4 | -5.02 | -3.58 | -4.62 | -5.01 |                                     |
| [Ch]Cl-DEG (1 : 4)             | 303.15 | 318.7 | -4.62 | -3.20 | -4.22 | -4.60 |                                     |

|                    |        |       |       |       |       |       |                                |
|--------------------|--------|-------|-------|-------|-------|-------|--------------------------------|
| [Ch]Cl-DEG (1 : 4) | 303.15 | 417.2 | -4.32 | -2.93 | -3.92 | -4.33 |                                |
| [Ch]Cl-DEG (1 : 4) | 303.15 | 519   | -4.09 | -2.71 | -3.68 | -4.11 |                                |
| [Ch]Cl-DEG (1 : 4) | 313.15 | 116.5 | -5.81 | -4.43 | -5.45 | -5.90 |                                |
| [Ch]Cl-DEG (1 : 4) | 313.15 | 217.1 | -5.13 | -3.81 | -4.80 | -5.19 |                                |
| [Ch]Cl-DEG (1 : 4) | 313.15 | 313.5 | -4.73 | -3.44 | -4.41 | -4.79 |                                |
| [Ch]Cl-DEG (1 : 4) | 313.15 | 416   | -4.43 | -3.16 | -4.10 | -4.51 |                                |
| [Ch]Cl-DEG (1 : 4) | 313.15 | 518.2 | -4.22 | -2.94 | -3.85 | -4.29 |                                |
| [Ch]Cl-DEG (1 : 4) | 323.15 | 116.7 | -6.07 | -4.64 | -5.60 | -6.06 |                                |
| [Ch]Cl-DEG (1 : 4) | 323.15 | 221.2 | -5.40 | -4.00 | -4.94 | -5.34 |                                |
| [Ch]Cl-DEG (1 : 4) | 323.15 | 327.4 | -4.93 | -3.60 | -4.52 | -4.92 |                                |
| [Ch]Cl-DEG (1 : 4) | 323.15 | 419.2 | -4.65 | -3.35 | -4.25 | -4.67 |                                |
| [Ch]Cl-DEG (1 : 4) | 323.15 | 526.9 | -4.41 | -3.12 | -3.99 | -4.44 |                                |
| [Ch]Cl-FA (1 : 4)  | 303.15 | 82.5  | -5.74 | -4.50 | -5.58 | -5.83 | Lu et al. (2015) <sup>12</sup> |
| [Ch]Cl-FA (1 : 4)  | 303.15 | 212.1 | -4.80 | -3.56 | -4.60 | -4.85 |                                |
| [Ch]Cl-FA (1 : 4)  | 303.15 | 319.3 | -4.37 | -3.14 | -4.16 | -4.43 |                                |
| [Ch]Cl-FA (1 : 4)  | 303.15 | 412.5 | -4.10 | -2.89 | -3.88 | -4.18 |                                |
| [Ch]Cl-FA (1 : 4)  | 303.15 | 519.3 | -3.89 | -2.65 | -3.62 | -3.95 |                                |
| [Ch]Cl-FA (1 : 4)  | 303.15 | 581.5 | -3.78 | -2.54 | -3.49 | -3.83 |                                |
| [Ch]Cl-FA (1 : 4)  | 313.15 | 70.3  | -5.99 | -4.89 | -5.91 | -6.11 |                                |
| [Ch]Cl-FA (1 : 4)  | 313.15 | 192.2 | -5.05 | -3.88 | -4.87 | -5.10 |                                |
| [Ch]Cl-FA (1 : 4)  | 313.15 | 295.4 | -4.62 | -3.45 | -4.42 | -4.65 |                                |
| [Ch]Cl-FA (1 : 4)  | 313.15 | 403.5 | -4.32 | -3.13 | -4.07 | -4.34 |                                |
| [Ch]Cl-FA (1 : 4)  | 313.15 | 502.8 | -4.10 | -2.91 | -3.83 | -4.12 |                                |
| [Ch]Cl-FA (1 : 4)  | 313.15 | 568.8 | -4.00 | -2.78 | -3.69 | -3.99 |                                |
| [Ch]Cl-FA (1 : 4)  | 323.15 | 65.2  | -6.17 | -5.17 | -6.15 | -6.29 |                                |
| [Ch]Cl-FA (1 : 4)  | 323.15 | 188.1 | -5.24 | -4.11 | -5.06 | -5.25 |                                |
| [Ch]Cl-FA (1 : 4)  | 323.15 | 296.2 | -4.77 | -3.65 | -4.57 | -4.77 |                                |
| [Ch]Cl-FA (1 : 4)  | 323.15 | 399.3 | -4.47 | -3.35 | -4.25 | -4.48 |                                |

|                    |        |       |       |       |       |       |                                |
|--------------------|--------|-------|-------|-------|-------|-------|--------------------------------|
| [Ch]Cl-FA (1 : 4)  | 323.15 | 494.2 | -4.25 | -3.13 | -4.01 | -4.26 |                                |
| [Ch]Cl-FA (1 : 4)  | 323.15 | 565.8 | -4.11 | -3.00 | -3.85 | -4.12 |                                |
| [Ch]Cl-FA (1 : 4)  | 333.15 | 86.8  | -6.12 | -5.07 | -6.00 | -6.15 |                                |
| [Ch]Cl-FA (1 : 4)  | 333.15 | 220.3 | -5.22 | -4.14 | -5.04 | -5.20 |                                |
| [Ch]Cl-FA (1 : 4)  | 333.15 | 326.1 | -4.83 | -3.74 | -4.62 | -4.80 |                                |
| [Ch]Cl-FA (1 : 4)  | 333.15 | 426.6 | -4.53 | -3.47 | -4.32 | -4.53 |                                |
| [Ch]Cl-FA (1 : 4)  | 333.15 | 529.6 | -4.34 | -3.25 | -4.08 | -4.31 |                                |
| [Ch]Cl-FA (1 : 4)  | 333.15 | 585.4 | -4.23 | -3.15 | -3.96 | -4.20 |                                |
| [Ch]Cl-LEV (1 : 4) | 303.15 | 72.5  | -5.55 | -4.75 | -5.82 | -5.59 | Lu et al. (2015) <sup>12</sup> |
| [Ch]Cl-LEV (1 : 4) | 303.15 | 201.2 | -4.52 | -3.73 | -4.77 | -4.62 |                                |
| [Ch]Cl-LEV (1 : 4) | 303.15 | 305.3 | -4.09 | -3.31 | -4.32 | -4.19 |                                |
| [Ch]Cl-LEV (1 : 4) | 303.15 | 410.6 | -3.79 | -3.01 | -4.00 | -3.89 |                                |
| [Ch]Cl-LEV (1 : 4) | 303.15 | 508.4 | -3.57 | -2.79 | -3.76 | -3.66 |                                |
| [Ch]Cl-LEV (1 : 4) | 303.15 | 574.9 | -3.45 | -2.67 | -3.62 | -3.52 |                                |
| [Ch]Cl-LEV (1 : 4) | 313.15 | 60    | -5.84 | -5.16 | -6.19 | -5.90 |                                |
| [Ch]Cl-LEV (1 : 4) | 313.15 | 176.9 | -4.77 | -4.08 | -5.08 | -4.92 |                                |
| [Ch]Cl-LEV (1 : 4) | 313.15 | 282.4 | -4.31 | -3.61 | -4.58 | -4.45 |                                |
| [Ch]Cl-LEV (1 : 4) | 313.15 | 380.1 | -3.99 | -3.31 | -4.26 | -4.14 |                                |
| [Ch]Cl-LEV (1 : 4) | 313.15 | 485.1 | -3.77 | -3.06 | -3.99 | -3.88 |                                |
| [Ch]Cl-LEV (1 : 4) | 313.15 | 565.9 | -3.60 | -2.91 | -3.81 | -3.71 |                                |
| [Ch]Cl-LEV (1 : 4) | 323.15 | 83    | -5.74 | -5.04 | -6.02 | -5.80 |                                |
| [Ch]Cl-LEV (1 : 4) | 323.15 | 219.6 | -4.78 | -4.07 | -5.01 | -4.86 |                                |
| [Ch]Cl-LEV (1 : 4) | 323.15 | 321.1 | -4.38 | -3.68 | -4.60 | -4.47 |                                |
| [Ch]Cl-LEV (1 : 4) | 323.15 | 423.5 | -4.09 | -3.41 | -4.30 | -4.19 |                                |
| [Ch]Cl-LEV (1 : 4) | 323.15 | 523.8 | -3.89 | -3.19 | -4.06 | -3.96 |                                |
| [Ch]Cl-LEV (1 : 4) | 323.15 | 584.2 | -3.78 | -3.08 | -3.94 | -3.83 |                                |
| [Ch]Cl-LEV (1 : 4) | 333.15 | 82.6  | -6.03 | -5.24 | -6.17 | -5.94 |                                |
| [Ch]Cl-LEV (1 : 4) | 333.15 | 218.5 | -4.93 | -4.26 | -5.16 | -5.01 |                                |

|                       |        |       |       |       |       |       |                                              |
|-----------------------|--------|-------|-------|-------|-------|-------|----------------------------------------------|
| [Ch]Cl-LEV (1 : 4)    | 333.15 | 326   | -4.58 | -3.86 | -4.73 | -4.61 |                                              |
| [Ch]Cl-LEV (1 : 4)    | 333.15 | 426.2 | -4.28 | -3.59 | -4.44 | -4.33 |                                              |
| [Ch]Cl-LEV (1 : 4)    | 333.15 | 528.5 | -4.09 | -3.37 | -4.20 | -4.09 |                                              |
| [Ch]Cl-LEV (1 : 4)    | 333.15 | 587.4 | -3.99 | -3.27 | -4.08 | -3.97 |                                              |
| [Ch]Cl-Phenol (1 : 4) | 293.15 | 108.2 | -5.45 | -3.87 | -4.99 | -5.41 | <a href="#">Li et al. (2014)<sup>7</sup></a> |
| [Ch]Cl-Phenol (1 : 4) | 293.15 | 212.1 | -4.79 | -3.19 | -4.28 | -4.69 |                                              |
| [Ch]Cl-Phenol (1 : 4) | 293.15 | 312.6 | -4.38 | -2.79 | -3.86 | -4.28 |                                              |
| [Ch]Cl-Phenol (1 : 4) | 293.15 | 401.6 | -4.12 | -2.53 | -3.58 | -4.03 |                                              |
| [Ch]Cl-Phenol (1 : 4) | 293.15 | 509.2 | -3.85 | -2.29 | -3.31 | -3.79 |                                              |
| [Ch]Cl-Phenol (1 : 4) | 303.15 | 115   | -5.66 | -4.06 | -5.12 | -5.53 |                                              |
| [Ch]Cl-Phenol (1 : 4) | 303.15 | 220   | -5.01 | -3.40 | -4.44 | -4.83 |                                              |
| [Ch]Cl-Phenol (1 : 4) | 303.15 | 323.9 | -4.59 | -3.01 | -4.02 | -4.43 |                                              |
| [Ch]Cl-Phenol (1 : 4) | 303.15 | 420.9 | -4.30 | -2.74 | -3.73 | -4.16 |                                              |
| [Ch]Cl-Phenol (1 : 4) | 303.15 | 523.3 | -4.06 | -2.52 | -3.48 | -3.94 |                                              |
| [Ch]Cl-Phenol (1 : 4) | 313.15 | 117.1 | -5.74 | -4.27 | -5.28 | -5.68 |                                              |
| [Ch]Cl-Phenol (1 : 4) | 313.15 | 214.2 | -5.08 | -3.66 | -4.65 | -5.03 |                                              |
| [Ch]Cl-Phenol (1 : 4) | 313.15 | 320.4 | -4.65 | -3.25 | -4.22 | -4.61 |                                              |
| [Ch]Cl-Phenol (1 : 4) | 313.15 | 415.8 | -4.38 | -2.99 | -3.93 | -4.35 |                                              |
| [Ch]Cl-Phenol (1 : 4) | 313.15 | 504.5 | -4.15 | -2.79 | -3.71 | -4.15 |                                              |
| [Ch]Cl-Phenol (1 : 4) | 323.15 | 118.2 | -5.91 | -4.47 | -5.44 | -5.83 |                                              |
| [Ch]Cl-Phenol (1 : 4) | 323.15 | 221.4 | -5.28 | -3.84 | -4.78 | -5.16 |                                              |
| [Ch]Cl-Phenol (1 : 4) | 323.15 | 325.1 | -4.84 | -3.45 | -4.37 | -4.76 |                                              |
| [Ch]Cl-Phenol (1 : 4) | 323.15 | 418.4 | -4.52 | -3.20 | -4.09 | -4.50 |                                              |
| [Ch]Cl-Phenol (1 : 4) | 323.15 | 529.1 | -4.33 | -2.96 | -3.82 | -4.26 |                                              |
| [Ch]Cl-TEG (1 : 4)    | 293.15 | 119   | -5.12 | -3.42 | -4.54 | -5.28 | <a href="#">Li et al. (2014)<sup>7</sup></a> |
| [Ch]Cl-TEG (1 : 4)    | 293.15 | 215   | -4.51 | -2.83 | -3.92 | -4.59 |                                              |
| [Ch]Cl-TEG (1 : 4)    | 293.15 | 322.1 | -4.07 | -2.42 | -3.49 | -4.14 |                                              |
| [Ch]Cl-TEG (1 : 4)    | 293.15 | 404.3 | -3.82 | -2.19 | -3.24 | -3.89 |                                              |



|                                  |        |       |       |       |       |       |                                      |
|----------------------------------|--------|-------|-------|-------|-------|-------|--------------------------------------|
| [Ch]Cl-TEG (1 : 4)               | 293.15 | 513.5 | -3.58 | -1.95 | -2.97 | -3.63 |                                      |
| [Ch]Cl-TEG (1 : 4)               | 303.15 | 109.3 | -5.32 | -3.75 | -4.81 | -5.53 |                                      |
| [Ch]Cl-TEG (1 : 4)               | 303.15 | 211.5 | -4.61 | -3.09 | -4.13 | -4.78 |                                      |
| [Ch]Cl-TEG (1 : 4)               | 303.15 | 310.4 | -4.21 | -2.70 | -3.72 | -4.35 |                                      |
| [Ch]Cl-TEG (1 : 4)               | 303.15 | 410.5 | -3.91 | -2.42 | -3.41 | -4.05 |                                      |
| [Ch]Cl-TEG (1 : 4)               | 303.15 | 513   | -3.70 | -2.19 | -3.16 | -3.80 |                                      |
| [Ch]Cl-TEG (1 : 4)               | 313.15 | 119.6 | -5.47 | -3.88 | -4.89 | -5.58 |                                      |
| [Ch]Cl-TEG (1 : 4)               | 313.15 | 219.3 | -4.82 | -3.27 | -4.26 | -4.89 |                                      |
| [Ch]Cl-TEG (1 : 4)               | 313.15 | 315.2 | -4.39 | -2.91 | -3.88 | -4.49 |                                      |
| [Ch]Cl-TEG (1 : 4)               | 313.15 | 415   | -4.09 | -2.63 | -3.58 | -4.19 |                                      |
| [Ch]Cl-TEG (1 : 4)               | 313.15 | 519   | -3.90 | -2.41 | -3.33 | -3.94 |                                      |
| [Ch]Cl-TEG (1 : 4)               | 323.15 | 118.8 | -5.71 | -4.10 | -5.07 | -5.72 |                                      |
| [Ch]Cl-TEG (1 : 4)               | 323.15 | 221.4 | -5.02 | -3.48 | -4.42 | -5.02 |                                      |
| [Ch]Cl-TEG (1 : 4)               | 323.15 | 318.6 | -4.65 | -3.11 | -4.03 | -4.62 |                                      |
| [Ch]Cl-TEG (1 : 4)               | 323.15 | 420.2 | -4.31 | -2.83 | -3.73 | -4.32 |                                      |
| [Ch]Cl-TEG (1 : 4)               | 323.15 | 520.3 | -4.09 | -2.62 | -3.49 | -4.07 |                                      |
| [MTPP]Br-1,2-PRO (1 : 4)         | 298.15 | 220   | -5.84 | -3.47 | -4.54 | -5.14 | Sarmad et al.<br>(2017) <sup>6</sup> |
| [MTPP]Br-1,2-PRO (1 : 4)         | 298.15 | 528   | -4.39 | -2.64 | -3.63 | -4.21 |                                      |
| [MTPP]Br-1,2-PRO (1 : 4)         | 298.15 | 861   | -3.53 | -2.19 | -3.10 | -3.61 |                                      |
| [MTPP]Br-1,2-PRO (1 : 4)         | 298.15 | 1120  | -3.28 | -1.96 | -2.81 | -3.28 |                                      |
| [MTPP]Br-1,2-propanediol (1 : 4) | 298.15 | 1547  | -3.03 | -1.69 | -2.43 | -2.90 |                                      |
| [MTPP]Br-1,2-propanediol (1 : 4) | 298.15 | 1834  | -2.80 | -1.54 | -2.22 | -2.73 |                                      |
| [MTPP]Br-1,2-propanediol (1 : 4) | 298.15 | 2026  | -2.69 | -1.27 | -1.89 | -2.64 |                                      |
| [MTPP]Br-AC (1 : 4)              | 298.15 | 173   | -4.75 | -3.81 | -4.89 | -4.55 | Sarmad et al.<br>(2017) <sup>6</sup> |
| [MTPP]Br-AC (1 : 4)              | 298.15 | 380   | -3.70 | -3.05 | -4.08 | -3.67 |                                      |
| [MTPP]Br-AC (1 : 4)              | 298.15 | 652   | -3.11 | -2.55 | -3.51 | -3.05 |                                      |
| [MTPP]Br-AC (1 : 4)              | 298.15 | 938   | -2.55 | -2.22 | -3.11 | -2.57 |                                      |

|                               |        |       |       |       |       |       |                                      |
|-------------------------------|--------|-------|-------|-------|-------|-------|--------------------------------------|
| [MTPP]Br-AC (1 : 4)           | 298.15 | 1134  | -2.23 | -2.05 | -2.90 | -2.32 |                                      |
| [MTPP]Br-AC (1 : 4)           | 298.15 | 1524  | -1.75 | -1.80 | -2.55 | -1.94 |                                      |
| [MTPP]Br-AC (1 : 4)           | 298.15 | 1843  | -1.55 | -1.64 | -2.31 | -1.71 |                                      |
| [MTPP]Br-AC (1 : 4)           | 298.15 | 2014  | -1.33 | -1.57 | -2.19 | -1.62 |                                      |
| [TMA]Cl-AC (1 : 4)            | 298.15 | 294   | -4.79 | -3.68 | -4.73 | -4.85 | Sarmad et al.<br>(2017) <sup>6</sup> |
| [TMA]Cl-AC (1 : 4)            | 298.15 | 519   | -3.90 | -3.11 | -4.11 | -4.29 |                                      |
| [TMA]Cl-AC (1 : 4)            | 298.15 | 731   | -3.82 | -2.77 | -3.71 | -3.98 |                                      |
| [TMA]Cl-AC (1 : 4)            | 298.15 | 1015  | -3.65 | -2.44 | -3.31 | -3.68 |                                      |
| [TMA]Cl-AC (1 : 4)            | 298.15 | 1312  | -3.47 | -2.17 | -2.97 | -3.45 |                                      |
| [TMA]Cl-AC (1 : 4)            | 298.15 | 1741  | -3.12 | -1.88 | -2.57 | -3.23 |                                      |
| [TPA]Cl-EA (1 : 4)            | 298.15 | 481   | -3.49 | -2.44 | -3.44 | -3.19 | Sarmad et al.<br>(2017) <sup>6</sup> |
| [TPA]Cl-EA (1 : 4)            | 298.15 | 784   | -2.88 | -2.00 | -2.93 | -2.72 |                                      |
| [TPA]Cl-EA (1 : 4)            | 298.15 | 1057  | -2.52 | -1.74 | -2.60 | -2.44 |                                      |
| [TPA]Cl-EA (1 : 4)            | 298.15 | 1317  | -2.34 | -1.56 | -2.35 | -2.24 |                                      |
| [TPA]Cl-EA (1 : 4)            | 298.15 | 1700  | -2.23 | -1.22 | -1.93 | -2.04 |                                      |
| [TPA]Cl-EA (1 : 4)            | 298.15 | 2009  | -2.14 | -1.08 | -1.71 | -1.92 |                                      |
| [MTPP]Br-GLY (1 : 4)          | 298.15 | 161   | -6.64 | -3.55 | -4.63 | -6.38 | Sarmad et al.<br>(2017) <sup>6</sup> |
| [MTPP]Br-GLY (1 : 4)          | 298.15 | 443   | -5.35 | -2.59 | -3.60 | -5.25 |                                      |
| [MTPP]Br-GLY (1 : 4)          | 298.15 | 875   | -4.14 | -1.98 | -2.89 | -4.36 |                                      |
| [MTPP]Br-GLY (1 : 4)          | 298.15 | 1225  | -3.55 | -1.70 | -2.52 | -3.86 |                                      |
| [MTPP]Br-GLY (1 : 4)          | 298.15 | 1696  | -3.32 | -1.26 | -1.97 | -3.41 |                                      |
| [MTPP]Br-GLY (1 : 4)          | 298.15 | 2026  | -3.21 | -1.10 | -1.73 | -3.20 |                                      |
| [Ch]Cl-1,4-butanediol (1 : 4) | 293.15 | 109.5 | -5.78 | -4.17 | -5.29 | -5.73 | Chen et al.<br>(2014) <sup>13</sup>  |
| [Ch]Cl-1,4-butanediol (1 : 4) | 293.15 | 214.5 | -5.08 | -3.49 | -4.58 | -4.93 |                                      |
| [Ch]Cl-1,4-butanediol (1 : 4) | 293.15 | 316.4 | -4.68 | -3.10 | -4.17 | -4.50 |                                      |
| [Ch]Cl-1,4-butanediol (1 : 4) | 293.15 | 411.6 | -4.40 | -2.83 | -3.88 | -4.23 |                                      |

|                               |        |       |       |       |       |       |                                     |
|-------------------------------|--------|-------|-------|-------|-------|-------|-------------------------------------|
| [Ch]Cl-1,4-butanediol (1 : 4) | 293.15 | 513.4 | -4.17 | -2.61 | -3.62 | -4.02 |                                     |
| [Ch]Cl-1,4-butanediol (1 : 4) | 303.15 | 105.8 | -5.91 | -4.44 | -5.50 | -5.96 |                                     |
| [Ch]Cl-1,4-butanediol (1 : 4) | 303.15 | 205.8 | -5.26 | -3.77 | -4.81 | -5.18 |                                     |
| [Ch]Cl-1,4-butanediol (1 : 4) | 303.15 | 304.7 | -4.80 | -3.37 | -4.39 | -4.74 |                                     |
| [Ch]Cl-1,4-butanediol (1 : 4) | 303.15 | 403.3 | -4.51 | -3.09 | -4.08 | -4.46 |                                     |
| [Ch]Cl-1,4-butanediol (1 : 4) | 303.15 | 503.6 | -4.31 | -2.86 | -3.83 | -4.24 |                                     |
| [Ch]Cl-1,4-butanediol (1 : 4) | 313.15 | 119.5 | -5.95 | -4.53 | -5.54 | -6.01 |                                     |
| [Ch]Cl-1,4-butanediol (1 : 4) | 313.15 | 223.2 | -5.32 | -3.90 | -4.89 | -5.27 |                                     |
| [Ch]Cl-1,4-butanediol (1 : 4) | 313.15 | 312.5 | -4.95 | -3.56 | -4.53 | -4.90 |                                     |
| [Ch]Cl-1,4-butanediol (1 : 4) | 313.15 | 410   | -4.65 | -3.29 | -4.23 | -4.63 |                                     |
| [Ch]Cl-1,4-butanediol (1 : 4) | 313.15 | 507.2 | -4.43 | -3.07 | -3.99 | -4.42 |                                     |
| [Ch]Cl-1,4-butanediol (1 : 4) | 323.15 | 123   | -6.12 | -4.70 | -5.66 | -6.15 |                                     |
| [Ch]Cl-1,4-butanediol (1 : 4) | 323.15 | 221.6 | -5.55 | -4.11 | -5.05 | -5.45 |                                     |
| [Ch]Cl-1,4-butanediol (1 : 4) | 323.15 | 332.6 | -5.08 | -3.70 | -4.61 | -5.01 |                                     |
| [Ch]Cl-1,4-butanediol (1 : 4) | 323.15 | 425.3 | -4.82 | -3.45 | -4.34 | -4.77 |                                     |
| [Ch]Cl-1,4-butanediol (1 : 4) | 323.15 | 519   | -4.59 | -3.25 | -4.12 | -4.57 |                                     |
| [Ch]Cl-2,3-butanediol (1 : 4) | 293.15 | 107.1 | -5.57 | -4.22 | -5.34 | -5.53 | Chen et al.<br>(2014) <sup>13</sup> |
| [Ch]Cl-2,3-butanediol (1 : 4) | 293.15 | 207.2 | -4.95 | -3.55 | -4.65 | -4.79 |                                     |
| [Ch]Cl-2,3-butanediol (1 : 4) | 293.15 | 309.7 | -4.52 | -3.15 | -4.22 | -4.36 |                                     |
| [Ch]Cl-2,3-butanediol (1 : 4) | 293.15 | 403   | -4.21 | -2.88 | -3.93 | -4.09 |                                     |
| [Ch]Cl-2,3-butanediol (1 : 4) | 293.15 | 508.5 | -3.97 | -2.64 | -3.66 | -3.87 |                                     |
| [Ch]Cl-2,3-butanediol (1 : 4) | 303.15 | 117.6 | -5.66 | -4.35 | -5.41 | -5.62 |                                     |
| [Ch]Cl-2,3-butanediol (1 : 4) | 303.15 | 218.7 | -4.99 | -3.72 | -4.76 | -4.93 |                                     |
| [Ch]Cl-2,3-butanediol (1 : 4) | 303.15 | 320.1 | -4.59 | -3.34 | -4.35 | -4.52 |                                     |
| [Ch]Cl-2,3-butanediol (1 : 4) | 303.15 | 409.2 | -4.31 | -3.09 | -4.08 | -4.28 |                                     |
| [Ch]Cl-2,3-butanediol (1 : 4) | 303.15 | 511.2 | -4.09 | -2.86 | -3.83 | -4.05 |                                     |
| [Ch]Cl-2,3-butanediol (1 : 4) | 313.15 | 110.9 | -5.81 | -4.61 | -5.63 | -5.86 |                                     |
| [Ch]Cl-2,3-butanediol (1 : 4) | 313.15 | 217.2 | -5.10 | -3.93 | -4.92 | -5.11 |                                     |

|                                |        |       |       |       |       |       |                                     |
|--------------------------------|--------|-------|-------|-------|-------|-------|-------------------------------------|
| [Ch]Cl-2,3-butanediol (1 : 4)  | 313.15 | 318   | -4.74 | -3.55 | -4.52 | -4.71 |                                     |
| [Ch]Cl-2,3-butanediol (1 : 4)  | 313.15 | 414.9 | -4.44 | -3.28 | -4.22 | -4.44 |                                     |
| [Ch]Cl-2,3-butanediol (1 : 4)  | 313.15 | 511   | -4.23 | -3.07 | -3.99 | -4.23 |                                     |
| [Ch]Cl-2,3-butanediol (1 : 4)  | 323.15 | 116.4 | -5.81 | -4.75 | -5.72 | -5.97 |                                     |
| [Ch]Cl-2,3-butanediol (1 : 4)  | 323.15 | 214.1 | -5.26 | -4.14 | -5.08 | -5.29 |                                     |
| [Ch]Cl-2,3-butanediol (1 : 4)  | 323.15 | 315.9 | -4.85 | -3.75 | -4.67 | -4.88 |                                     |
| [Ch]Cl-2,3-butanediol (1 : 4)  | 323.15 | 425.7 | -4.55 | -3.45 | -4.34 | -4.58 |                                     |
| [Ch]Cl-2,3-butanediol (1 : 4)  | 323.15 | 512.5 | -4.34 | -3.26 | -4.13 | -4.39 |                                     |
| [Ch]Cl-1,2-propanediol (1 : 4) | 293.15 | 104.4 | -5.78 | -4.54 | -5.66 | -5.98 | Chen et al.<br>(2014) <sup>13</sup> |
| [Ch]Cl-1,2-propanediol (1 : 4) | 293.15 | 209.6 | -5.05 | -3.84 | -4.93 | -5.17 |                                     |
| [Ch]Cl-1,2-propanediol (1 : 4) | 293.15 | 307.6 | -4.67 | -3.45 | -4.52 | -4.76 |                                     |
| [Ch]Cl-1,2-propanediol (1 : 4) | 293.15 | 401.1 | -4.37 | -3.18 | -4.23 | -4.50 |                                     |
| [Ch]Cl-1,2-propanediol (1 : 4) | 293.15 | 501.5 | -4.10 | -2.96 | -3.98 | -4.30 |                                     |
| [Ch]Cl-1,2-propanediol (1 : 4) | 303.15 | 117.2 | -5.91 | -4.64 | -5.71 | -6.03 |                                     |
| [Ch]Cl-1,2-propanediol (1 : 4) | 303.15 | 220.1 | -5.30 | -4.01 | -5.05 | -5.30 |                                     |
| [Ch]Cl-1,2-propanediol (1 : 4) | 303.15 | 321.7 | -4.89 | -3.63 | -4.64 | -4.90 |                                     |
| [Ch]Cl-1,2-propanediol (1 : 4) | 303.15 | 415.6 | -4.60 | -3.37 | -4.36 | -4.65 |                                     |
| [Ch]Cl-1,2-propanediol (1 : 4) | 303.15 | 517.5 | -4.35 | -3.15 | -4.11 | -4.45 |                                     |
| [Ch]Cl-1,2-propanediol (1 : 4) | 313.15 | 121.6 | -6.17 | -4.81 | -5.82 | -6.15 |                                     |
| [Ch]Cl-1,2-propanediol (1 : 4) | 313.15 | 225.2 | -5.45 | -4.19 | -5.17 | -5.44 |                                     |
| [Ch]Cl-1,2-propanediol (1 : 4) | 313.15 | 325.1 | -5.12 | -3.82 | -4.78 | -5.06 |                                     |
| [Ch]Cl-1,2-propanediol (1 : 4) | 313.15 | 421.4 | -4.82 | -3.56 | -4.49 | -4.81 |                                     |
| [Ch]Cl-1,2-propanediol (1 : 4) | 313.15 | 525.6 | -4.55 | -3.33 | -4.25 | -4.60 |                                     |
| [Ch]Cl-1,2-propanediol (1 : 4) | 323.15 | 122.5 | -6.21 | -4.98 | -5.95 | -6.29 |                                     |
| [Ch]Cl-1,2-propanediol (1 : 4) | 323.15 | 226.6 | -5.63 | -4.36 | -5.31 | -5.59 |                                     |
| [Ch]Cl-1,2-propanediol (1 : 4) | 323.15 | 326.5 | -5.26 | -4.00 | -4.91 | -5.20 |                                     |
| [Ch]Cl-1,2-propanediol (1 : 4) | 323.15 | 425   | -4.95 | -3.73 | -4.62 | -4.95 |                                     |
| [Ch]Cl-1,2-propanediol (1 : 4) | 323.15 | 519.8 | -4.74 | -3.53 | -4.40 | -4.76 |                                     |

|                               |        |       |       |       |       |       |                                       |
|-------------------------------|--------|-------|-------|-------|-------|-------|---------------------------------------|
| Betain-DEG (1 : 4)            | 308.15 | 200.5 | -4.85 | -3.65 | -4.67 | -4.82 | He et al. (2022) <sup>16</sup>        |
| Betain-DEG (1 : 4)            | 308.15 | 343.3 | -4.28 | -3.12 | -4.10 | -4.25 |                                       |
| Betain-DEG (1 : 4)            | 308.15 | 439.8 | -4.01 | -2.87 | -3.83 | -4.01 |                                       |
| Betain-DEG (1 : 4)            | 308.15 | 525   | -3.83 | -2.70 | -3.64 | -3.84 |                                       |
| Betain-DEG (1 : 4)            | 308.15 | 632.5 | -3.63 | -2.52 | -3.43 | -3.67 |                                       |
| Betain-DEG (1 : 4)            | 318.15 | 223.3 | -4.93 | -3.76 | -4.72 | -4.87 |                                       |
| Betain-DEG (1 : 4)            | 318.15 | 362.8 | -4.41 | -3.28 | -4.21 | -4.37 |                                       |
| Betain-DEG (1 : 4)            | 318.15 | 464.5 | -4.13 | -3.03 | -3.94 | -4.13 |                                       |
| Betain-DEG (1 : 4)            | 318.15 | 554.3 | -3.94 | -2.86 | -3.74 | -3.96 |                                       |
| Betain-DEG (1 : 4)            | 318.15 | 668.5 | -3.75 | -2.67 | -3.53 | -3.78 |                                       |
| Betain-DEG (1 : 4)            | 328.15 | 234   | -5.02 | -3.91 | -4.83 | -4.96 |                                       |
| Betain-DEG (1 : 4)            | 328.15 | 381.3 | -4.52 | -3.43 | -4.31 | -4.46 |                                       |
| Betain-DEG (1 : 4)            | 328.15 | 488.5 | -4.24 | -3.18 | -4.04 | -4.22 |                                       |
| Betain-DEG (1 : 4)            | 328.15 | 583   | -4.05 | -3.01 | -3.84 | -4.05 |                                       |
| Betain-DEG (1 : 4)            | 328.15 | 703.3 | -3.85 | -2.82 | -3.62 | -3.87 |                                       |
| Betain-DEG (1 : 4)            | 338.15 | 245.5 | -5.15 | -4.05 | -4.92 | -5.05 |                                       |
| Betain-DEG (1 : 4)            | 338.15 | 399   | -4.62 | -3.57 | -4.40 | -4.56 |                                       |
| Betain-DEG (1 : 4)            | 338.15 | 511.5 | -4.34 | -3.32 | -4.13 | -4.32 |                                       |
| Betain-DEG (1 : 4)            | 338.15 | 610.5 | -4.14 | -3.15 | -3.93 | -4.15 |                                       |
| Betain-DEG (1 : 4)            | 338.15 | 736.8 | -3.95 | -2.96 | -3.71 | -3.96 |                                       |
| Betain-DEG (1 : 4)            | 348.15 | 256.3 | -5.26 | -4.18 | -5.01 | -5.15 |                                       |
| Betain-DEG (1 : 4)            | 348.15 | 416.3 | -4.71 | -3.70 | -4.49 | -4.66 |                                       |
| Betain-DEG (1 : 4)            | 348.15 | 533.8 | -4.43 | -3.45 | -4.21 | -4.42 |                                       |
| Betain-DEG (1 : 4)            | 348.15 | 637.3 | -4.23 | -3.28 | -4.01 | -4.24 |                                       |
| Betain-DEG (1 : 4)            | 348.15 | 769.3 | -4.04 | -3.09 | -3.79 | -4.05 |                                       |
| [Ch]Cl-1,2-butanediol (1 : 4) | 303.15 | 371.3 | -4.43 | -3.24 | -4.24 | -4.22 | Hagbakhsh et al. (2022) <sup>17</sup> |
| [Ch]Cl-1,2-butanediol (1 : 4) | 303.15 | 797.5 | -3.66 | -2.46 | -3.36 | -3.51 |                                       |

|                               |        |        |       |       |       |       |                                      |
|-------------------------------|--------|--------|-------|-------|-------|-------|--------------------------------------|
| [Ch]Cl-1,2-butanediol (1 : 4) | 303.15 | 1225.5 | -3.23 | -2.01 | -2.81 | -3.12 |                                      |
| [Ch]Cl-1,2-butanediol (1 : 4) | 303.15 | 1646.3 | -2.88 | -1.70 | -2.39 | -2.89 |                                      |
| [Ch]Cl-1,2-butanediol (1 : 4) | 303.15 | 2076.8 | -2.67 | -1.44 | -2.03 | -2.73 |                                      |
| [Ch]Cl-1,2-butanediol (1 : 4) | 303.15 | 2507.8 | -2.49 | -1.23 | -1.71 | -2.62 |                                      |
| [Ch]Cl-1,2-butanediol (1 : 4) | 303.15 | 2956.8 | -2.33 | -1.16 | -1.53 | -2.51 |                                      |
| [Ch]Cl-1,2-butanediol (1 : 4) | 313.15 | 388.3  | -4.56 | -3.40 | -4.35 | -4.36 |                                      |
| [Ch]Cl-1,2-butanediol (1 : 4) | 313.15 | 835.8  | -3.79 | -2.62 | -3.46 | -3.64 |                                      |
| [Ch]Cl-1,2-butanediol (1 : 4) | 313.15 | 1285.5 | -3.35 | -2.17 | -2.90 | -3.25 |                                      |
| [Ch]Cl-1,2-butanediol (1 : 4) | 313.15 | 1729.8 | -3.00 | -1.86 | -2.48 | -3.01 |                                      |
| [Ch]Cl-1,2-butanediol (1 : 4) | 313.15 | 2186   | -2.79 | -1.61 | -2.12 | -2.86 |                                      |
| [Ch]Cl-1,2-butanediol (1 : 4) | 313.15 | 2644.3 | -2.61 | -1.39 | -1.80 | -2.74 |                                      |
| [Ch]Cl-1,2-butanediol (1 : 4) | 313.15 | 3125   | -2.45 | -1.26 | -1.54 | -2.63 |                                      |
| [Ch]Cl-1,2-butanediol (1 : 4) | 323.15 | 404.5  | -4.66 | -3.55 | -4.44 | -4.47 |                                      |
| [Ch]Cl-1,2-butanediol (1 : 4) | 323.15 | 871.5  | -3.89 | -2.77 | -3.55 | -3.75 |                                      |
| [Ch]Cl-1,2-butanediol (1 : 4) | 323.15 | 1343.3 | -3.46 | -2.32 | -2.99 | -3.35 |                                      |
| [Ch]Cl-1,2-butanediol (1 : 4) | 323.15 | 1808.8 | -3.09 | -2.01 | -2.57 | -3.12 |                                      |
| [Ch]Cl-1,2-butanediol (1 : 4) | 323.15 | 2289   | -2.87 | -1.76 | -2.20 | -2.96 |                                      |
| [Ch]Cl-1,2-butanediol (1 : 4) | 323.15 | 2775   | -2.70 | -1.55 | -1.87 | -2.84 |                                      |
| [Ch]Cl-1,2-butanediol (1 : 4) | 323.15 | 3285.3 | -2.54 | -1.36 | -1.56 | -2.72 |                                      |
| [Ch]Cl-1,2-butanediol (1 : 4) | 333.15 | 420.5  | -4.76 | -3.68 | -4.53 | -4.58 |                                      |
| [Ch]Cl-1,2-butanediol (1 : 4) | 333.15 | 907    | -3.99 | -2.90 | -3.63 | -3.84 |                                      |
| [Ch]Cl-1,2-butanediol (1 : 4) | 333.15 | 1399.8 | -3.56 | -2.46 | -3.07 | -3.44 |                                      |
| [Ch]Cl-1,2-butanediol (1 : 4) | 333.15 | 1886.3 | -3.17 | -2.15 | -2.64 | -3.21 |                                      |
| [Ch]Cl-1,2-butanediol (1 : 4) | 333.15 | 2391.8 | -2.96 | -1.90 | -2.27 | -3.05 |                                      |
| [Ch]Cl-1,2-butanediol (1 : 4) | 333.15 | 2903.8 | -2.79 | -1.69 | -1.93 | -2.92 |                                      |
| [Ch]Cl-1,2-butanediol (1 : 4) | 333.15 | 3443.3 | -2.62 | -1.50 | -1.62 | -2.80 |                                      |
| [Ch]Cl-DEG (1 : 4)            | 303.15 | 524.2  | -4.08 | -2.70 | -3.67 | -4.10 | Haider et al.<br>(2018) <sup>9</sup> |
| [Ch]Cl-DEG (1 : 4)            | 303.15 | 617.3  | -3.92 | -2.54 | -3.48 | -3.94 |                                      |

|                         |        |        |       |       |       |       |                                   |
|-------------------------|--------|--------|-------|-------|-------|-------|-----------------------------------|
| [Ch]Cl-DEG (1 : 4)      | 303.15 | 726.5  | -3.75 | -2.37 | -3.29 | -3.77 |                                   |
| [Ch]Cl-DEG (1 : 4)      | 303.15 | 846.3  | -3.60 | -2.22 | -3.11 | -3.61 |                                   |
| [Ch]Cl-DEG (1 : 4)      | 303.15 | 924.3  | -3.51 | -2.13 | -3.00 | -3.52 |                                   |
| [Ch]Cl-DEG (1 : 4)      | 303.15 | 1032.2 | -3.40 | -2.02 | -2.86 | -3.41 |                                   |
| [Ch]Cl-DEG (1 : 4)      | 303.15 | 1119.7 | -3.32 | -1.93 | -2.75 | -3.32 |                                   |
| [TBA]Br-EG (1 : 4)      | 303.15 | 542.8  | -3.97 | -2.89 | -3.85 | -4.04 | Haider et al. (2018) <sup>9</sup> |
| [TBA]Br-EG (1 : 4)      | 303.15 | 669.5  | -3.71 | -2.70 | -3.63 | -3.84 |                                   |
| [TBA]Br-EG (1 : 4)      | 303.15 | 802.1  | -3.53 | -2.54 | -3.43 | -3.66 |                                   |
| [TBA]Br-EG (1 : 4)      | 303.15 | 832.5  | -3.48 | -2.50 | -3.39 | -3.62 |                                   |
| [TBA]Br-EG (1 : 4)      | 303.15 | 1075.9 | -3.23 | -2.28 | -3.11 | -3.37 |                                   |
| [TBA]Br-EG (1 : 4)      | 303.15 | 1374.2 | -3.00 | -2.06 | -2.82 | -3.14 |                                   |
| [TBA]Br-DEG (1 : 4)     | 303.15 | 590    | -3.06 | -2.29 | -3.24 | -3.45 | Haider et al. (2018) <sup>9</sup> |
| [TBA]Br-DEG (1 : 4)     | 303.15 | 639.9  | -2.99 | -2.22 | -3.15 | -3.37 |                                   |
| [TBA]Br-DEG (1 : 4)     | 303.15 | 756.9  | -2.82 | -2.07 | -2.98 | -3.19 |                                   |
| [TBA]Br-DEG (1 : 4)     | 303.15 | 908.8  | -2.54 | -1.91 | -2.78 | -3.00 |                                   |
| [TBA]Br-DEG (1 : 4)     | 303.15 | 1047.7 | -2.41 | -1.79 | -2.63 | -2.85 |                                   |
| [TBA]Br-MDA (1 : 4)     | 303.15 | 502.5  | -2.21 | -2.20 | -3.17 | -2.40 | Haider et al. (2018) <sup>9</sup> |
| [TBA]Br-MDA (1 : 4)     | 303.15 | 664.3  | -1.96 | -1.95 | -2.88 | -2.09 |                                   |
| [TBA]Br-MDA (1 : 4)     | 303.15 | 711.9  | -1.78 | -1.89 | -2.81 | -2.01 |                                   |
| [TBA]Br-MDA (1 : 4)     | 303.15 | 834    | -1.68 | -1.76 | -2.65 | -1.82 |                                   |
| [TBA]Br-MDA (1 : 4)     | 303.15 | 904    | -1.60 | -1.69 | -2.57 | -1.73 |                                   |
| [TBA]Br-MDA (1 : 4)     | 303.15 | 1021   | -1.49 | -1.59 | -2.44 | -1.58 |                                   |
| [Ch]Cl-Guaiacol (1 : 4) | 293.15 | 52.1   | -6.12 | -4.36 | -5.49 | -6.01 | Liu et al. (2017) <sup>14</sup>   |
| [Ch]Cl-Guaiacol (1 : 4) | 293.15 | 143.2  | -5.12 | -3.34 | -4.45 | -5.08 |                                   |
| [Ch]Cl-Guaiacol (1 : 4) | 293.15 | 231.9  | -4.64 | -2.86 | -3.95 | -4.57 |                                   |
| [Ch]Cl-Guaiacol (1 : 4) | 293.15 | 326.5  | -4.30 | -2.51 | -3.58 | -4.23 |                                   |

|                          |        |       |       |       |       |       |                                 |
|--------------------------|--------|-------|-------|-------|-------|-------|---------------------------------|
| [Ch]Cl-Guaiacol (1 : 4)  | 293.15 | 430   | -4.02 | -2.23 | -3.27 | -3.97 |                                 |
| [Ch]Cl-Guaiacol (1 : 4)  | 293.15 | 526   | -3.81 | -2.02 | -3.04 | -3.79 |                                 |
| [Ch]Cl-Guaiacol (1 : 4)  | 303.15 | 100.3 | -5.66 | -3.95 | -5.01 | -5.60 |                                 |
| [Ch]Cl-Guaiacol (1 : 4)  | 303.15 | 151.3 | -5.22 | -3.53 | -4.59 | -5.17 |                                 |
| [Ch]Cl-Guaiacol (1 : 4)  | 303.15 | 264.2 | -4.67 | -2.97 | -4.00 | -4.59 |                                 |
| [Ch]Cl-Guaiacol (1 : 4)  | 303.15 | 341.7 | -4.41 | -2.71 | -3.72 | -4.34 |                                 |
| [Ch]Cl-Guaiacol (1 : 4)  | 303.15 | 437.4 | -4.16 | -2.46 | -3.45 | -4.11 |                                 |
| [Ch]Cl-Guaiacol (1 : 4)  | 303.15 | 545.9 | -3.94 | -2.24 | -3.20 | -3.90 |                                 |
| [Ch]Cl-Guaiacol (1 : 4)  | 313.15 | 53.4  | -6.57 | -4.80 | -5.83 | -6.28 |                                 |
| [Ch]Cl-Guaiacol (1 : 4)  | 313.15 | 142.5 | -5.43 | -3.82 | -4.83 | -5.39 |                                 |
| [Ch]Cl-Guaiacol (1 : 4)  | 313.15 | 235.9 | -4.93 | -3.31 | -4.30 | -4.86 |                                 |
| [Ch]Cl-Guaiacol (1 : 4)  | 313.15 | 335.5 | -4.58 | -2.96 | -3.92 | -4.51 |                                 |
| [Ch]Cl-Guaiacol (1 : 4)  | 313.15 | 431.8 | -4.33 | -2.70 | -3.64 | -4.28 |                                 |
| [Ch]Cl-Guaiacol (1 : 4)  | 313.15 | 542.9 | -4.10 | -2.47 | -3.38 | -4.06 |                                 |
| [Ch]Cl-Guaiacol (1 : 4)  | 323.15 | 54.7  | -6.57 | -4.99 | -5.97 | -6.40 |                                 |
| [Ch]Cl-Guaiacol (1 : 4)  | 323.15 | 143.6 | -5.57 | -4.02 | -4.98 | -5.52 |                                 |
| [Ch]Cl-Guaiacol (1 : 4)  | 323.15 | 238.5 | -5.07 | -3.51 | -4.45 | -4.99 |                                 |
| [Ch]Cl-Guaiacol (1 : 4)  | 323.15 | 336.7 | -4.71 | -3.17 | -4.08 | -4.66 |                                 |
| [Ch]Cl-Guaiacol (1 : 4)  | 323.15 | 435.2 | -4.46 | -2.91 | -3.80 | -4.41 |                                 |
| [Ch]Cl-Guaiacol (1 : 4)  | 323.15 | 535.3 | -4.26 | -2.70 | -3.56 | -4.22 |                                 |
| [DEA]Cl-Guaiacol (1 : 4) | 293.15 | 49.6  | -5.99 | -4.43 | -5.56 | -5.95 | Liu et al. (2017) <sup>14</sup> |
| [DEA]Cl-Guaiacol (1 : 4) | 293.15 | 134.6 | -5.01 | -3.42 | -4.54 | -5.05 |                                 |
| [DEA]Cl-Guaiacol (1 : 4) | 293.15 | 224.4 | -4.50 | -2.91 | -4.00 | -4.50 |                                 |
| [DEA]Cl-Guaiacol (1 : 4) | 293.15 | 323.1 | -4.14 | -2.54 | -3.60 | -4.11 |                                 |
| [DEA]Cl-Guaiacol (1 : 4) | 293.15 | 411.3 | -3.89 | -2.29 | -3.34 | -3.84 |                                 |
| [DEA]Cl-Guaiacol (1 : 4) | 293.15 | 516.1 | -3.65 | -2.06 | -3.08 | -3.57 |                                 |
| [DEA]Cl-Guaiacol (1 : 4) | 303.15 | 61.7  | -5.88 | -4.46 | -5.53 | -5.92 |                                 |
| [DEA]Cl-Guaiacol (1 : 4) | 303.15 | 142.6 | -5.07 | -3.61 | -4.67 | -5.13 |                                 |



|                          |        |       |       |       |       |       |                                 |
|--------------------------|--------|-------|-------|-------|-------|-------|---------------------------------|
| [DEA]Cl-Guaiacol (1 : 4) | 303.15 | 227.5 | -4.61 | -3.14 | -4.18 | -4.63 |                                 |
| [DEA]Cl-Guaiacol (1 : 4) | 303.15 | 345.8 | -4.19 | -2.72 | -3.73 | -4.18 |                                 |
| [DEA]Cl-Guaiacol (1 : 4) | 303.15 | 425.4 | -3.98 | -2.51 | -3.50 | -3.96 |                                 |
| [DEA]Cl-Guaiacol (1 : 4) | 303.15 | 524.8 | -3.78 | -2.29 | -3.26 | -3.71 |                                 |
| [DEA]Cl-Guaiacol (1 : 4) | 313.15 | 54.2  | -6.21 | -4.81 | -5.84 | -6.15 |                                 |
| [DEA]Cl-Guaiacol (1 : 4) | 313.15 | 141.1 | -5.24 | -3.85 | -4.86 | -5.29 |                                 |
| [DEA]Cl-Guaiacol (1 : 4) | 313.15 | 242.2 | -4.71 | -3.31 | -4.29 | -4.71 |                                 |
| [DEA]Cl-Guaiacol (1 : 4) | 313.15 | 346.8 | -4.34 | -2.95 | -3.90 | -4.33 |                                 |
| [DEA]Cl-Guaiacol (1 : 4) | 313.15 | 431.8 | -4.12 | -2.72 | -3.66 | -4.09 |                                 |
| [DEA]Cl-Guaiacol (1 : 4) | 313.15 | 529.2 | -3.92 | -2.52 | -3.43 | -3.85 |                                 |
| [DEA]Cl-Guaiacol (1 : 4) | 323.15 | 58.9  | -6.27 | -4.94 | -5.92 | -6.22 |                                 |
| [DEA]Cl-Guaiacol (1 : 4) | 323.15 | 148.4 | -5.30 | -4.01 | -4.97 | -5.37 |                                 |
| [DEA]Cl-Guaiacol (1 : 4) | 323.15 | 230.1 | -4.88 | -3.57 | -4.51 | -4.90 |                                 |
| [DEA]Cl-Guaiacol (1 : 4) | 323.15 | 337.7 | -4.48 | -3.18 | -4.10 | -4.50 |                                 |
| [DEA]Cl-Guaiacol (1 : 4) | 323.15 | 430.4 | -4.24 | -2.94 | -3.83 | -4.24 |                                 |
| [DEA]Cl-Guaiacol (1 : 4) | 323.15 | 526.8 | -4.05 | -2.73 | -3.60 | -4.00 |                                 |
| [ACh]Cl-Guaiacol (1 : 4) | 293.15 | 55.1  | -5.95 | -4.28 | -5.41 | -5.92 | Liu et al. (2017) <sup>14</sup> |
| [ACh]Cl-Guaiacol (1 : 4) | 293.15 | 138.4 | -4.99 | -3.36 | -4.47 | -5.06 |                                 |
| [ACh]Cl-Guaiacol (1 : 4) | 293.15 | 227.6 | -4.50 | -2.86 | -3.95 | -4.52 |                                 |
| [ACh]Cl-Guaiacol (1 : 4) | 293.15 | 326.4 | -4.15 | -2.49 | -3.56 | -4.17 |                                 |
| [ACh]Cl-Guaiacol (1 : 4) | 293.15 | 422.1 | -3.89 | -2.23 | -3.28 | -3.93 |                                 |
| [ACh]Cl-Guaiacol (1 : 4) | 293.15 | 524.9 | -3.68 | -2.01 | -3.03 | -3.74 |                                 |
| [ACh]Cl-Guaiacol (1 : 4) | 303.15 | 54.8  | -6.12 | -4.53 | -5.61 | -6.06 |                                 |
| [ACh]Cl-Guaiacol (1 : 4) | 303.15 | 140.6 | -5.19 | -3.59 | -4.65 | -5.18 |                                 |
| [ACh]Cl-Guaiacol (1 : 4) | 303.15 | 263.7 | -4.53 | -2.96 | -3.98 | -4.52 |                                 |
| [ACh]Cl-Guaiacol (1 : 4) | 303.15 | 338.6 | -4.28 | -2.70 | -3.71 | -4.28 |                                 |
| [ACh]Cl-Guaiacol (1 : 4) | 303.15 | 431.8 | -4.03 | -2.46 | -3.45 | -4.06 |                                 |
| [ACh]Cl-Guaiacol (1 : 4) | 303.15 | 558.6 | -3.78 | -2.20 | -3.15 | -3.83 |                                 |

|                          |        |        |       |       |       |       |                                     |
|--------------------------|--------|--------|-------|-------|-------|-------|-------------------------------------|
| [ACh]Cl-Guaiacol (1 : 4) | 313.15 | 55.5   | -6.12 | -4.74 | -5.77 | -6.19 |                                     |
| [ACh]Cl-Guaiacol (1 : 4) | 313.15 | 140.8  | -5.24 | -3.81 | -4.82 | -5.33 |                                     |
| [ACh]Cl-Guaiacol (1 : 4) | 313.15 | 235.8  | -4.73 | -3.29 | -4.28 | -4.78 |                                     |
| [ACh]Cl-Guaiacol (1 : 4) | 313.15 | 330.2  | -4.41 | -2.96 | -3.92 | -4.45 |                                     |
| [ACh]Cl-Guaiacol (1 : 4) | 313.15 | 438.8  | -4.13 | -2.67 | -3.60 | -4.19 |                                     |
| [ACh]Cl-Guaiacol (1 : 4) | 313.15 | 531.5  | -3.94 | -2.47 | -3.39 | -4.02 |                                     |
| [ACh]Cl-Guaiacol (1 : 4) | 323.15 | 53     | -6.38 | -5.00 | -5.98 | -6.36 |                                     |
| [ACh]Cl-Guaiacol (1 : 4) | 323.15 | 165.3  | -5.24 | -3.86 | -4.82 | -5.29 |                                     |
| [ACh]Cl-Guaiacol (1 : 4) | 323.15 | 241.6  | -4.85 | -3.48 | -4.42 | -4.90 |                                     |
| [ACh]Cl-Guaiacol (1 : 4) | 323.15 | 339.3  | -4.52 | -3.14 | -4.05 | -4.57 |                                     |
| [ACh]Cl-Guaiacol (1 : 4) | 323.15 | 437.4  | -4.25 | -2.88 | -3.77 | -4.34 |                                     |
| [ACh]Cl-Guaiacol (1 : 4) | 323.15 | 536    | -4.06 | -2.68 | -3.54 | -4.15 |                                     |
| [TBP]Br-Phenol (1 : 4)   | 313.15 | 234.5  | -3.54 | -3.33 | -4.32 | -3.67 | Wang et al.<br>(2019) <sup>18</sup> |
| [TBP]Br-Phenol (1 : 4)   | 313.15 | 463.6  | -2.94 | -2.67 | -3.60 | -2.96 |                                     |
| [TBP]Br-Phenol (1 : 4)   | 313.15 | 737    | -2.35 | -2.23 | -3.09 | -2.44 |                                     |
| [TBP]Br-Phenol (1 : 4)   | 313.15 | 932    | -2.09 | -2.01 | -2.82 | -2.15 |                                     |
| [TBP]Br-Phenol (1 : 4)   | 313.15 | 1188.8 | -1.85 | -1.77 | -2.53 | -1.85 |                                     |
| [TBP]Br-Phenol (1 : 4)   | 313.15 | 1578.5 | -1.59 | -1.50 | -2.16 | -1.53 |                                     |
| [TBP]Br-Phenol (1 : 4)   | 323.15 | 163.8  | -3.97 | -3.89 | -4.85 | -4.11 |                                     |
| [TBP]Br-Phenol (1 : 4)   | 323.15 | 399    | -3.22 | -3.02 | -3.92 | -3.18 |                                     |
| [TBP]Br-Phenol (1 : 4)   | 323.15 | 608.4  | -2.69 | -2.61 | -3.46 | -2.73 |                                     |
| [TBP]Br-Phenol (1 : 4)   | 323.15 | 786.9  | -2.39 | -2.36 | -3.17 | -2.42 |                                     |
| [TBP]Br-Phenol (1 : 4)   | 323.15 | 1018.7 | -2.09 | -2.12 | -2.87 | -2.11 |                                     |
| [TBP]Br-Phenol (1 : 4)   | 323.15 | 1241.2 | -1.90 | -1.93 | -2.62 | -1.87 |                                     |
| [TBP]Br-Phenol (1 : 4)   | 333.15 | 203.4  | -4.00 | -3.87 | -4.77 | -3.95 |                                     |
| [TBP]Br-Phenol (1 : 4)   | 333.15 | 481.2  | -3.19 | -3.03 | -3.86 | -3.06 |                                     |
| [TBP]Br-Phenol (1 : 4)   | 333.15 | 601.7  | -2.84 | -2.81 | -3.62 | -2.81 |                                     |
| [TBP]Br-Phenol (1 : 4)   | 333.15 | 856    | -2.42 | -2.47 | -3.21 | -2.40 |                                     |

|                         |        |        |       |       |       |       |                                     |
|-------------------------|--------|--------|-------|-------|-------|-------|-------------------------------------|
| [TBP]Br-Phenol (1 : 4)  | 333.15 | 1024.7 | -2.16 | -2.30 | -3.00 | -2.18 |                                     |
| [TBP]Br-Phenol (1 : 4)  | 333.15 | 1272.9 | -1.94 | -2.09 | -2.73 | -1.93 |                                     |
| [TBP]Br-DEG (1 : 4)     | 313.15 | 183.5  | -3.75 | -3.60 | -4.60 | -3.65 | Wang et al.<br>(2019) <sup>18</sup> |
| [TBP]Br-DEG (1 : 4)     | 313.15 | 379.8  | -3.03 | -2.90 | -3.85 | -2.87 |                                     |
| [TBP]Br-DEG (1 : 4)     | 313.15 | 621.6  | -2.42 | -2.45 | -3.34 | -2.38 |                                     |
| [TBP]Br-DEG (1 : 4)     | 313.15 | 892.3  | -2.02 | -2.12 | -2.95 | -1.99 |                                     |
| [TBP]Br-DEG (1 : 4)     | 313.15 | 1024.5 | -1.85 | -2.00 | -2.80 | -1.84 |                                     |
| [TBP]Br-DEG (1 : 4)     | 313.15 | 1398.1 | -1.55 | -1.74 | -2.44 | -1.51 |                                     |
| [TBP]Br-DEG (1 : 4)     | 323.15 | 94.4   | -4.34 | -4.46 | -5.44 | -4.51 |                                     |
| [TBP]Br-DEG (1 : 4)     | 323.15 | 270.7  | -3.56 | -3.43 | -4.36 | -3.36 |                                     |
| [TBP]Br-DEG (1 : 4)     | 323.15 | 464.2  | -2.75 | -2.91 | -3.80 | -2.81 |                                     |
| [TBP]Br-DEG (1 : 4)     | 323.15 | 700.8  | -2.33 | -2.53 | -3.35 | -2.38 |                                     |
| [TBP]Br-DEG (1 : 4)     | 323.15 | 895.4  | -2.04 | -2.30 | -3.08 | -2.10 |                                     |
| [TBP]Br-DEG (1 : 4)     | 323.15 | 1148   | -1.79 | -2.08 | -2.80 | -1.82 |                                     |
| [TBP]Br-DEG (1 : 4)     | 333.15 | 164.8  | -4.08 | -4.11 | -5.02 | -4.02 |                                     |
| [TBP]Br-DEG (1 : 4)     | 333.15 | 397.4  | -3.19 | -3.25 | -4.11 | -3.08 |                                     |
| [TBP]Br-DEG (1 : 4)     | 333.15 | 642.3  | -2.56 | -2.79 | -3.59 | -2.57 |                                     |
| [TBP]Br-DEG (1 : 4)     | 333.15 | 903.8  | -2.13 | -2.47 | -3.21 | -2.18 |                                     |
| [TBP]Br-DEG (1 : 4)     | 333.15 | 1103.6 | -1.89 | -2.29 | -2.98 | -1.95 |                                     |
| [TBP]Br-DEG (1 : 4)     | 333.15 | 1396.5 | -1.63 | -2.08 | -2.69 | -1.69 |                                     |
| [ATPP]Br-Phenol (1 : 4) | 313.15 | 218.2  | -3.51 | -3.41 | -4.40 | -3.43 | Wang et al.<br>(2019) <sup>18</sup> |
| [ATPP]Br-Phenol (1 : 4) | 313.15 | 397.4  | -2.80 | -2.83 | -3.77 | -2.83 |                                     |
| [ATPP]Br-Phenol (1 : 4) | 313.15 | 631.6  | -2.31 | -2.38 | -3.27 | -2.32 |                                     |
| [ATPP]Br-Phenol (1 : 4) | 313.15 | 886.6  | -1.95 | -2.06 | -2.89 | -1.90 |                                     |
| [ATPP]Br-Phenol (1 : 4) | 313.15 | 1093.3 | -1.73 | -1.86 | -2.64 | -1.63 |                                     |
| [ATPP]Br-Phenol (1 : 4) | 313.15 | 1333.2 | -1.54 | -1.67 | -2.39 | -1.39 |                                     |
| [ATPP]Br-Phenol (1 : 4) | 323.15 | 231.4  | -3.38 | -3.56 | -4.50 | -3.54 |                                     |

|                         |        |        |       |       |       |       |                                   |
|-------------------------|--------|--------|-------|-------|-------|-------|-----------------------------------|
| [ATPP]Br-Phenol (1 : 4) | 323.15 | 415.3  | -3.03 | -2.99 | -3.88 | -2.95 |                                   |
| [ATPP]Br-Phenol (1 : 4) | 323.15 | 683.8  | -2.44 | -2.51 | -3.34 | -2.39 |                                   |
| [ATPP]Br-Phenol (1 : 4) | 323.15 | 904.6  | -2.08 | -2.24 | -3.01 | -2.04 |                                   |
| [ATPP]Br-Phenol (1 : 4) | 323.15 | 1125.7 | -1.80 | -2.03 | -2.75 | -1.75 |                                   |
| [ATPP]Br-Phenol (1 : 4) | 323.15 | 1325.9 | -1.62 | -1.87 | -2.55 | -1.55 |                                   |
| [ATPP]Br-Phenol (1 : 4) | 333.15 | 182.7  | -3.90 | -3.99 | -4.90 | -3.93 |                                   |
| [ATPP]Br-Phenol (1 : 4) | 333.15 | 472.8  | -2.94 | -3.05 | -3.89 | -2.97 |                                   |
| [ATPP]Br-Phenol (1 : 4) | 333.15 | 664.5  | -2.55 | -2.72 | -3.51 | -2.58 |                                   |
| [ATPP]Br-Phenol (1 : 4) | 333.15 | 821.3  | -2.27 | -2.52 | -3.27 | -2.31 |                                   |
| [ATPP]Br-Phenol (1 : 4) | 333.15 | 1066.4 | -1.96 | -2.27 | -2.96 | -1.96 |                                   |
| [ATPP]Br-Phenol (1 : 4) | 333.15 | 1345.1 | -1.72 | -2.04 | -2.67 | -1.67 |                                   |
| [ATPP]Br-DEG (1 : 4)    | 303.15 | 160    | -3.34 | -3.52 | -4.57 | -3.66 | Ghaedi et al (2017) <sup>19</sup> |
| [ATPP]Br-DEG (1 : 4)    | 303.15 | 340    | -2.57 | -2.80 | -3.81 | -2.86 |                                   |
| [ATPP]Br-DEG (1 : 4)    | 303.15 | 491    | -2.18 | -2.46 | -3.43 | -2.48 |                                   |
| [ATPP]Br-DEG (1 : 4)    | 303.15 | 739    | -1.75 | -2.09 | -3.01 | -2.02 |                                   |
| [ATPP]Br-DEG (1 : 4)    | 303.15 | 870    | -1.52 | -1.95 | -2.83 | -1.83 |                                   |
| [ATPP]Br-TEG (1 : 4)    | 303.15 | 142    | -3.32 | -3.19 | -4.25 | -3.69 |                                   |
| [ATPP]Br-TEG (1 : 4)    | 303.15 | 333    | -2.46 | -2.39 | -3.40 | -2.79 |                                   |
| [ATPP]Br-TEG (1 : 4)    | 303.15 | 490    | -2.06 | -2.04 | -3.01 | -2.36 |                                   |
| [ATPP]Br-TEG (1 : 4)    | 303.15 | 718    | -1.65 | -1.71 | -2.62 | -1.87 |                                   |
| [ATPP]Br-TEG (1 : 4)    | 303.15 | 874    | -1.41 | -1.54 | -2.42 | -1.57 |                                   |
| [ATPP]Br-TEG (1 : 4)    | 303.15 | 1070   | -1.20 | -1.31 | -2.14 | -1.26 |                                   |
| [Ch]Cl-Phenol (1 : 4)   | 313.15 | 2360   | -2.36 | -1.35 | -1.82 | -2.58 | Ji et al. (2016) <sup>11</sup>    |
| [Ch]Cl-Phenol (1 : 4)   | 313.15 | 4470   | -1.97 | -0.77 | -0.73 | -1.97 |                                   |
| [TBA]Br-HexA (1 : 4)    | 303.15 | 506    | -2.92 | -2.45 | -3.42 | -2.96 | Luo et al. (2021) <sup>10</sup>   |
| [TBA]Br-HexA (1 : 4)    | 303.15 | 623    | -2.74 | -2.26 | -3.20 | -2.78 |                                   |
| [TBA]Br-HexA (1 : 4)    | 303.15 | 826    | -2.52 | -2.01 | -2.90 | -2.54 |                                   |

|                      |        |      |       |       |       |       |                                 |
|----------------------|--------|------|-------|-------|-------|-------|---------------------------------|
| [TBA]Br-HexA (1 : 4) | 303.15 | 930  | -2.36 | -1.90 | -2.77 | -2.43 |                                 |
| [TBA]Br-HexA (1 : 4) | 303.15 | 1035 | -2.29 | -1.81 | -2.65 | -2.34 |                                 |
| [TBA]Br-HexA (1 : 4) | 303.15 | 1125 | -2.20 | -1.73 | -2.55 | -2.27 |                                 |
| [TBA]Br-HexA (1 : 4) | 303.15 | 1335 | -2.04 | -1.58 | -2.35 | -2.14 |                                 |
| [TBA]Br-HexA (1 : 4) | 313.15 | 521  | -3.11 | -2.63 | -3.54 | -3.10 |                                 |
| [TBA]Br-HexA (1 : 4) | 313.15 | 627  | -2.91 | -2.45 | -3.34 | -2.94 |                                 |
| [TBA]Br-HexA (1 : 4) | 313.15 | 754  | -2.81 | -2.28 | -3.14 | -2.78 |                                 |
| [TBA]Br-HexA (1 : 4) | 313.15 | 829  | -2.67 | -2.20 | -3.04 | -2.70 |                                 |
| [TBA]Br-HexA (1 : 4) | 313.15 | 911  | -2.61 | -2.11 | -2.93 | -2.61 |                                 |
| [TBA]Br-HexA (1 : 4) | 313.15 | 990  | -2.49 | -2.03 | -2.84 | -2.54 |                                 |
| [TBA]Br-HexA (1 : 4) | 313.15 | 1170 | -2.40 | -1.88 | -2.64 | -2.40 |                                 |
| [TBA]Br-HexA (1 : 4) | 323.15 | 457  | -3.48 | -2.94 | -3.83 | -3.37 |                                 |
| [TBA]Br-HexA (1 : 4) | 323.15 | 540  | -3.32 | -2.78 | -3.65 | -3.23 |                                 |
| [TBA]Br-HexA (1 : 4) | 323.15 | 652  | -3.16 | -2.60 | -3.44 | -3.06 |                                 |
| [TBA]Br-HexA (1 : 4) | 323.15 | 723  | -3.03 | -2.51 | -3.33 | -2.97 |                                 |
| [TBA]Br-HexA (1 : 4) | 323.15 | 847  | -2.90 | -2.36 | -3.15 | -2.83 |                                 |
| [TBA]Br-HexA (1 : 4) | 323.15 | 993  | -2.73 | -2.21 | -2.97 | -2.69 |                                 |
| [TBA]Br-HexA (1 : 4) | 323.15 | 1145 | -2.59 | -2.08 | -2.80 | -2.57 |                                 |
| [TEA]Br-HexA (1 : 4) | 303.15 | 483  | -3.33 | -2.56 | -3.53 | -3.21 | Luo et al. (2021) <sup>10</sup> |
| [TEA]Br-HexA (1 : 4) | 303.15 | 578  | -3.13 | -2.39 | -3.34 | -3.05 |                                 |
| [TEA]Br-HexA (1 : 4) | 303.15 | 661  | -3.07 | -2.26 | -3.19 | -2.94 |                                 |
| [TEA]Br-HexA (1 : 4) | 303.15 | 824  | -2.78 | -2.05 | -2.94 | -2.74 |                                 |
| [TEA]Br-HexA (1 : 4) | 303.15 | 922  | -2.68 | -1.95 | -2.82 | -2.64 |                                 |
| [TEA]Br-HexA (1 : 4) | 303.15 | 1024 | -2.56 | -1.85 | -2.69 | -2.55 |                                 |
| [TEA]Br-HexA (1 : 4) | 303.15 | 1263 | -2.35 | -1.66 | -2.44 | -2.38 |                                 |
| [TEA]Br-HexA (1 : 4) | 313.15 | 388  | -3.71 | -2.98 | -3.92 | -3.58 |                                 |
| [TEA]Br-HexA (1 : 4) | 313.15 | 456  | -3.57 | -2.82 | -3.75 | -3.43 |                                 |
| [TEA]Br-HexA (1 : 4) | 313.15 | 585  | -3.32 | -2.58 | -3.48 | -3.21 |                                 |

|                                |        |       |       |       |       |       |                                |
|--------------------------------|--------|-------|-------|-------|-------|-------|--------------------------------|
| [TEA]Br-HexA (1 : 4)           | 313.15 | 714   | -3.10 | -2.39 | -3.26 | -3.03 |                                |
| [TEA]Br-HexA (1 : 4)           | 313.15 | 856   | -2.89 | -2.22 | -3.05 | -2.87 |                                |
| [TEA]Br-HexA (1 : 4)           | 313.15 | 992   | -2.74 | -2.08 | -2.88 | -2.74 |                                |
| [TEA]Br-HexA (1 : 4)           | 313.15 | 1161  | -2.55 | -1.93 | -2.69 | -2.61 |                                |
| [TEA]Br-HexA (1 : 4)           | 323.15 | 458   | -3.69 | -3.01 | -3.89 | -3.59 |                                |
| [TEA]Br-HexA (1 : 4)           | 323.15 | 553   | -3.49 | -2.83 | -3.69 | -3.42 |                                |
| [TEA]Br-HexA (1 : 4)           | 323.15 | 626   | -3.38 | -2.71 | -3.55 | -3.31 |                                |
| [TEA]Br-HexA (1 : 4)           | 323.15 | 718   | -3.23 | -2.57 | -3.39 | -3.18 |                                |
| [TEA]Br-HexA (1 : 4)           | 323.15 | 804   | -3.11 | -2.46 | -3.27 | -3.08 |                                |
| [TEA]Br-HexA (1 : 4)           | 323.15 | 947   | -2.94 | -2.31 | -3.07 | -2.93 |                                |
| [TEA]Br-HexA (1 : 4)           | 323.15 | 1114  | -2.83 | -2.16 | -2.88 | -2.79 |                                |
| Betain-1,2-propanediol (1 : 5) | 308.15 | 190.8 | -5.26 | -4.08 | -5.13 | -5.17 | He et al. (2022) <sup>16</sup> |
| Betain-1,2-propanediol (1 : 5) | 308.15 | 302.3 | -4.82 | -3.62 | -4.63 | -4.68 |                                |
| Betain-1,2-propanediol (1 : 5) | 308.15 | 404.3 | -4.49 | -3.33 | -4.31 | -4.42 |                                |
| Betain-1,2-propanediol (1 : 5) | 308.15 | 506.5 | -4.27 | -3.11 | -4.06 | -4.23 |                                |
| Betain-1,2-propanediol (1 : 5) | 308.15 | 606.5 | -4.06 | -2.93 | -3.84 | -4.08 |                                |
| Betain-1,2-propanediol (1 : 5) | 318.15 | 208   | -5.40 | -4.19 | -5.22 | -5.24 |                                |
| Betain-1,2-propanediol (1 : 5) | 318.15 | 317.5 | -4.98 | -3.77 | -4.76 | -4.81 |                                |
| Betain-1,2-propanediol (1 : 5) | 318.15 | 424.8 | -4.61 | -3.48 | -4.44 | -4.54 |                                |
| Betain-1,2-propanediol (1 : 5) | 318.15 | 531.8 | -4.37 | -3.26 | -4.18 | -4.35 |                                |
| Betain-1,2-propanediol (1 : 5) | 318.15 | 637   | -4.17 | -3.08 | -3.97 | -4.21 |                                |
| Betain-1,2-propanediol (1 : 5) | 328.15 | 211.3 | -5.55 | -4.36 | -5.37 | -5.36 |                                |
| Betain-1,2-propanediol (1 : 5) | 328.15 | 332.3 | -5.08 | -3.91 | -4.88 | -4.90 |                                |
| Betain-1,2-propanediol (1 : 5) | 328.15 | 444.3 | -4.71 | -3.62 | -4.55 | -4.65 |                                |
| Betain-1,2-propanediol (1 : 5) | 328.15 | 556.3 | -4.47 | -3.39 | -4.29 | -4.46 |                                |
| Betain-1,2-propanediol (1 : 5) | 328.15 | 666.5 | -4.25 | -3.21 | -4.08 | -4.31 |                                |
| Betain-1,2-propanediol (1 : 5) | 338.15 | 213.5 | -5.68 | -4.52 | -5.52 | -5.49 |                                |
| Betain-1,2-propanediol (1 : 5) | 338.15 | 338.8 | -5.19 | -4.06 | -5.01 | -5.03 |                                |

|                                |        |       |       |       |       |       |                                 |
|--------------------------------|--------|-------|-------|-------|-------|-------|---------------------------------|
| Betain-1,2-propanediol (1 : 5) | 338.15 | 463.5 | -4.80 | -3.74 | -4.66 | -4.75 |                                 |
| Betain-1,2-propanediol (1 : 5) | 338.15 | 573.3 | -4.56 | -3.53 | -4.42 | -4.57 |                                 |
| Betain-1,2-propanediol (1 : 5) | 338.15 | 687.3 | -4.34 | -3.35 | -4.20 | -4.42 |                                 |
| Betain-1,2-propanediol (1 : 5) | 348.15 | 215   | -5.84 | -4.67 | -5.65 | -5.63 |                                 |
| Betain-1,2-propanediol (1 : 5) | 348.15 | 344.5 | -5.28 | -4.20 | -5.14 | -5.15 |                                 |
| Betain-1,2-propanediol (1 : 5) | 348.15 | 482   | -4.88 | -3.86 | -4.76 | -4.86 |                                 |
| Betain-1,2-propanediol (1 : 5) | 348.15 | 593.5 | -4.64 | -3.65 | -4.52 | -4.68 |                                 |
| Betain-1,2-propanediol (1 : 5) | 348.15 | 729   | -4.41 | -3.45 | -4.27 | -4.50 |                                 |
| [Ch]Cl-Guaiacol (1 : 5)        | 293.15 | 52.8  | -6.03 | -4.31 | -5.42 | -5.97 | Liu et al. (2017) <sup>14</sup> |
| [Ch]Cl-Guaiacol (1 : 5)        | 293.15 | 139.8 | -5.13 | -3.33 | -4.41 | -5.07 |                                 |
| [Ch]Cl-Guaiacol (1 : 5)        | 293.15 | 246.1 | -4.53 | -2.76 | -3.81 | -4.47 |                                 |
| [Ch]Cl-Guaiacol (1 : 5)        | 293.15 | 331.1 | -4.23 | -2.46 | -3.48 | -4.19 |                                 |
| [Ch]Cl-Guaiacol (1 : 5)        | 293.15 | 419.5 | -3.99 | -2.21 | -3.21 | -3.97 |                                 |
| [Ch]Cl-Guaiacol (1 : 5)        | 293.15 | 528.4 | -3.76 | -1.97 | -2.94 | -3.77 |                                 |
| [Ch]Cl-Guaiacol (1 : 5)        | 303.15 | 46.9  | -6.38 | -4.67 | -5.77 | -6.21 |                                 |
| [Ch]Cl-Guaiacol (1 : 5)        | 303.15 | 145.2 | -5.26 | -3.54 | -4.60 | -5.19 |                                 |
| [Ch]Cl-Guaiacol (1 : 5)        | 303.15 | 239.4 | -4.73 | -3.03 | -4.07 | -4.67 |                                 |
| [Ch]Cl-Guaiacol (1 : 5)        | 303.15 | 330.4 | -4.41 | -2.71 | -3.72 | -4.35 |                                 |
| [Ch]Cl-Guaiacol (1 : 5)        | 303.15 | 431.8 | -4.13 | -2.44 | -3.41 | -4.11 |                                 |
| [Ch]Cl-Guaiacol (1 : 5)        | 303.15 | 538.9 | -3.91 | -2.21 | -3.15 | -3.91 |                                 |
| [Ch]Cl-Guaiacol (1 : 5)        | 313.15 | 55.3  | -6.27 | -4.73 | -5.81 | -6.25 |                                 |
| [Ch]Cl-Guaiacol (1 : 5)        | 313.15 | 140.7 | -5.40 | -3.80 | -4.85 | -5.39 |                                 |
| [Ch]Cl-Guaiacol (1 : 5)        | 313.15 | 235.9 | -4.88 | -3.28 | -4.30 | -4.84 |                                 |
| [Ch]Cl-Guaiacol (1 : 5)        | 313.15 | 331.8 | -4.54 | -2.93 | -3.92 | -4.51 |                                 |
| [Ch]Cl-Guaiacol (1 : 5)        | 313.15 | 434.8 | -4.25 | -2.66 | -3.62 | -4.26 |                                 |
| [Ch]Cl-Guaiacol (1 : 5)        | 313.15 | 536.4 | -4.05 | -2.44 | -3.37 | -4.07 |                                 |
| [Ch]Cl-Guaiacol (1 : 5)        | 323.15 | 48.5  | -6.50 | -5.07 | -6.14 | -6.48 |                                 |
| [Ch]Cl-Guaiacol (1 : 5)        | 323.15 | 146.3 | -5.52 | -3.97 | -5.00 | -5.49 |                                 |

|                          |        |       |       |       |       |       |                                 |
|--------------------------|--------|-------|-------|-------|-------|-------|---------------------------------|
| [Ch]Cl-Guaiacol (1 : 5)  | 323.15 | 237.5 | -5.04 | -3.48 | -4.49 | -4.99 |                                 |
| [Ch]Cl-Guaiacol (1 : 5)  | 323.15 | 334.9 | -4.67 | -3.13 | -4.11 | -4.65 |                                 |
| [Ch]Cl-Guaiacol (1 : 5)  | 323.15 | 432   | -4.42 | -2.88 | -3.82 | -4.42 |                                 |
| [Ch]Cl-Guaiacol (1 : 5)  | 323.15 | 529.2 | -4.21 | -2.67 | -3.59 | -4.24 |                                 |
| [DEA]Cl-Guaiacol (1 : 5) | 293.15 | 48.8  | -5.95 | -4.40 | -5.51 | -5.95 | Liu et al. (2017) <sup>14</sup> |
| [DEA]Cl-Guaiacol (1 : 5) | 293.15 | 131.9 | -4.95 | -3.40 | -4.49 | -5.04 |                                 |
| [DEA]Cl-Guaiacol (1 : 5) | 293.15 | 245.3 | -4.35 | -2.77 | -3.83 | -4.35 |                                 |
| [DEA]Cl-Guaiacol (1 : 5) | 293.15 | 326.5 | -4.06 | -2.48 | -3.51 | -4.04 |                                 |
| [DEA]Cl-Guaiacol (1 : 5) | 293.15 | 419.2 | -3.81 | -2.23 | -3.22 | -3.77 |                                 |
| [DEA]Cl-Guaiacol (1 : 5) | 293.15 | 522.3 | -3.59 | -2.00 | -2.96 | -3.51 |                                 |
| [DEA]Cl-Guaiacol (1 : 5) | 303.15 | 57    | -5.91 | -4.49 | -5.59 | -5.98 |                                 |
| [DEA]Cl-Guaiacol (1 : 5) | 303.15 | 148.3 | -5.01 | -3.53 | -4.60 | -5.07 |                                 |
| [DEA]Cl-Guaiacol (1 : 5) | 303.15 | 244.9 | -4.49 | -3.03 | -4.06 | -4.52 |                                 |
| [DEA]Cl-Guaiacol (1 : 5) | 303.15 | 341.2 | -4.16 | -2.69 | -3.69 | -4.16 |                                 |
| [DEA]Cl-Guaiacol (1 : 5) | 303.15 | 424.4 | -3.94 | -2.47 | -3.44 | -3.92 |                                 |
| [DEA]Cl-Guaiacol (1 : 5) | 303.15 | 520.1 | -3.74 | -2.26 | -3.21 | -3.68 |                                 |
| [DEA]Cl-Guaiacol (1 : 5) | 313.15 | 58.8  | -6.03 | -4.69 | -5.77 | -6.10 |                                 |
| [DEA]Cl-Guaiacol (1 : 5) | 313.15 | 156   | -5.08 | -3.71 | -4.76 | -5.17 |                                 |
| [DEA]Cl-Guaiacol (1 : 5) | 313.15 | 273.6 | -4.52 | -3.14 | -4.16 | -4.56 |                                 |
| [DEA]Cl-Guaiacol (1 : 5) | 313.15 | 336.3 | -4.32 | -2.93 | -3.93 | -4.34 |                                 |
| [DEA]Cl-Guaiacol (1 : 5) | 313.15 | 428.6 | -4.07 | -2.69 | -3.65 | -4.07 |                                 |
| [DEA]Cl-Guaiacol (1 : 5) | 313.15 | 550.7 | -3.82 | -2.43 | -3.35 | -3.78 |                                 |
| [DEA]Cl-Guaiacol (1 : 5) | 323.15 | 59.9  | -6.21 | -4.88 | -5.95 | -6.23 |                                 |
| [DEA]Cl-Guaiacol (1 : 5) | 323.15 | 193.1 | -4.99 | -3.71 | -4.73 | -5.08 |                                 |
| [DEA]Cl-Guaiacol (1 : 5) | 323.15 | 253.3 | -4.73 | -3.43 | -4.44 | -4.79 |                                 |
| [DEA]Cl-Guaiacol (1 : 5) | 323.15 | 333.8 | -4.45 | -3.16 | -4.13 | -4.50 |                                 |
| [DEA]Cl-Guaiacol (1 : 5) | 323.15 | 431.5 | -4.19 | -2.89 | -3.84 | -4.22 |                                 |
| [DEA]Cl-Guaiacol (1 : 5) | 323.15 | 535.8 | -3.96 | -2.67 | -3.59 | -3.96 |                                 |



|                          |        |       |       |       |       |       |                                 |
|--------------------------|--------|-------|-------|-------|-------|-------|---------------------------------|
| [ACh]Cl-Guaiacol (1 : 5) | 293.15 | 49.3  | -6.07 | -4.36 | -5.47 | -5.98 | Liu et al. (2017) <sup>14</sup> |
| [ACh]Cl-Guaiacol (1 : 5) | 293.15 | 137.3 | -5.04 | -3.33 | -4.42 | -5.04 |                                 |
| [ACh]Cl-Guaiacol (1 : 5) | 293.15 | 230   | -4.49 | -2.81 | -3.87 | -4.48 |                                 |
| [ACh]Cl-Guaiacol (1 : 5) | 293.15 | 325.5 | -4.14 | -2.46 | -3.49 | -4.14 |                                 |
| [ACh]Cl-Guaiacol (1 : 5) | 293.15 | 421.7 | -3.87 | -2.20 | -3.19 | -3.91 |                                 |
| [ACh]Cl-Guaiacol (1 : 5) | 293.15 | 522.2 | -3.67 | -1.98 | -2.94 | -3.73 |                                 |
| [ACh]Cl-Guaiacol (1 : 5) | 303.15 | 52    | -6.07 | -4.55 | -5.65 | -6.09 |                                 |
| [ACh]Cl-Guaiacol (1 : 5) | 303.15 | 138.8 | -5.13 | -3.57 | -4.63 | -5.18 |                                 |
| [ACh]Cl-Guaiacol (1 : 5) | 303.15 | 222.9 | -4.66 | -3.09 | -4.13 | -4.67 |                                 |
| [ACh]Cl-Guaiacol (1 : 5) | 303.15 | 333.2 | -4.25 | -2.68 | -3.69 | -4.28 |                                 |
| [ACh]Cl-Guaiacol (1 : 5) | 303.15 | 428   | -4.00 | -2.43 | -3.41 | -4.06 |                                 |
| [ACh]Cl-Guaiacol (1 : 5) | 303.15 | 528.2 | -3.79 | -2.22 | -3.16 | -3.88 |                                 |
| [ACh]Cl-Guaiacol (1 : 5) | 313.15 | 49.9  | -6.38 | -4.82 | -5.90 | -6.27 |                                 |
| [ACh]Cl-Guaiacol (1 : 5) | 313.15 | 145   | -5.22 | -3.75 | -4.80 | -5.29 |                                 |
| [ACh]Cl-Guaiacol (1 : 5) | 313.15 | 237   | -4.73 | -3.26 | -4.28 | -4.77 |                                 |
| [ACh]Cl-Guaiacol (1 : 5) | 313.15 | 335.1 | -4.39 | -2.91 | -3.90 | -4.44 |                                 |
| [ACh]Cl-Guaiacol (1 : 5) | 313.15 | 432.8 | -4.13 | -2.65 | -3.61 | -4.21 |                                 |
| [ACh]Cl-Guaiacol (1 : 5) | 313.15 | 526.5 | -3.94 | -2.45 | -3.38 | -4.04 |                                 |
| [ACh]Cl-Guaiacol (1 : 5) | 323.15 | 48.6  | -6.44 | -5.05 | -6.12 | -6.42 |                                 |
| [ACh]Cl-Guaiacol (1 : 5) | 323.15 | 144.3 | -5.34 | -3.96 | -5.00 | -5.44 |                                 |
| [ACh]Cl-Guaiacol (1 : 5) | 323.15 | 238.7 | -4.85 | -3.46 | -4.47 | -4.91 |                                 |
| [ACh]Cl-Guaiacol (1 : 5) | 323.15 | 341.3 | -4.49 | -3.10 | -4.08 | -4.57 |                                 |
| [ACh]Cl-Guaiacol (1 : 5) | 323.15 | 436.2 | -4.23 | -2.85 | -3.80 | -4.35 |                                 |
| [ACh]Cl-Guaiacol (1 : 5) | 323.15 | 535.8 | -4.02 | -2.64 | -3.56 | -4.17 |                                 |
| [Ch]Cl-FA (1 : 5)        | 303.15 | 77.3  | -5.78 | -4.54 | -5.63 | -5.79 | Lu et al. (2015) <sup>12</sup>  |
| [Ch]Cl-FA (1 : 5)        | 303.15 | 210.2 | -4.77 | -3.54 | -4.58 | -4.75 |                                 |
| [Ch]Cl-FA (1 : 5)        | 303.15 | 316.5 | -4.38 | -3.12 | -4.13 | -4.33 |                                 |
| [Ch]Cl-FA (1 : 5)        | 303.15 | 414.7 | -4.09 | -2.85 | -3.83 | -4.06 |                                 |

|                    |        |       |       |       |       |       |                                |
|--------------------|--------|-------|-------|-------|-------|-------|--------------------------------|
| [Ch]Cl-FA (1 : 5)  | 303.15 | 516.3 | -3.88 | -2.63 | -3.57 | -3.85 |                                |
| [Ch]Cl-FA (1 : 5)  | 303.15 | 577.4 | -3.76 | -2.51 | -3.44 | -3.74 |                                |
| [Ch]Cl-FA (1 : 5)  | 313.15 | 70.9  | -5.99 | -4.85 | -5.92 | -5.99 |                                |
| [Ch]Cl-FA (1 : 5)  | 313.15 | 203.4 | -4.95 | -3.79 | -4.82 | -4.92 |                                |
| [Ch]Cl-FA (1 : 5)  | 313.15 | 304.7 | -4.55 | -3.38 | -4.39 | -4.50 |                                |
| [Ch]Cl-FA (1 : 5)  | 313.15 | 404.9 | -4.26 | -3.10 | -4.07 | -4.23 |                                |
| [Ch]Cl-FA (1 : 5)  | 313.15 | 505.2 | -4.04 | -2.87 | -3.81 | -4.01 |                                |
| [Ch]Cl-FA (1 : 5)  | 313.15 | 570.2 | -3.92 | -2.75 | -3.67 | -3.89 |                                |
| [Ch]Cl-FA (1 : 5)  | 323.15 | 71.3  | -6.07 | -5.05 | -6.11 | -6.11 |                                |
| [Ch]Cl-FA (1 : 5)  | 323.15 | 194.1 | -5.10 | -4.04 | -5.07 | -5.10 |                                |
| [Ch]Cl-FA (1 : 5)  | 323.15 | 301   | -4.67 | -3.60 | -4.59 | -4.64 |                                |
| [Ch]Cl-FA (1 : 5)  | 323.15 | 403.6 | -4.37 | -3.31 | -4.26 | -4.36 |                                |
| [Ch]Cl-FA (1 : 5)  | 323.15 | 502.8 | -4.15 | -3.08 | -4.01 | -4.14 |                                |
| [Ch]Cl-FA (1 : 5)  | 323.15 | 573.1 | -4.02 | -2.95 | -3.85 | -4.01 |                                |
| [Ch]Cl-FA (1 : 5)  | 333.15 | 74.9  | -6.21 | -5.19 | -6.24 | -6.17 |                                |
| [Ch]Cl-FA (1 : 5)  | 333.15 | 204.2 | -5.22 | -4.18 | -5.19 | -5.16 |                                |
| [Ch]Cl-FA (1 : 5)  | 333.15 | 315.2 | -4.78 | -3.75 | -4.72 | -4.71 |                                |
| [Ch]Cl-FA (1 : 5)  | 333.15 | 409.6 | -4.50 | -3.48 | -4.43 | -4.46 |                                |
| [Ch]Cl-FA (1 : 5)  | 333.15 | 511.7 | -4.29 | -3.26 | -4.17 | -4.24 |                                |
| [Ch]Cl-FA (1 : 5)  | 333.15 | 577.2 | -4.17 | -3.14 | -4.03 | -4.11 |                                |
| [Ch]Cl-LEV (1 : 5) | 303.15 | 71.5  | -5.50 | -4.74 | -5.83 | -5.59 | Lu et al. (2015) <sup>12</sup> |
| [Ch]Cl-LEV (1 : 5) | 303.15 | 188.9 | -4.49 | -3.77 | -4.82 | -4.66 |                                |
| [Ch]Cl-LEV (1 : 5) | 303.15 | 296.9 | -4.03 | -3.31 | -4.33 | -4.19 |                                |
| [Ch]Cl-LEV (1 : 5) | 303.15 | 401.7 | -3.74 | -3.01 | -3.99 | -3.89 |                                |
| [Ch]Cl-LEV (1 : 5) | 303.15 | 501.5 | -3.53 | -2.78 | -3.74 | -3.65 |                                |
| [Ch]Cl-LEV (1 : 5) | 303.15 | 566.7 | -3.40 | -2.66 | -3.59 | -3.51 |                                |
| [Ch]Cl-LEV (1 : 5) | 313.15 | 73.1  | -5.74 | -4.94 | -6.02 | -5.73 |                                |
| [Ch]Cl-LEV (1 : 5) | 313.15 | 200.1 | -4.65 | -3.93 | -4.97 | -4.76 |                                |

|                                |        |       |       |       |       |       |                                |
|--------------------------------|--------|-------|-------|-------|-------|-------|--------------------------------|
| [Ch]Cl-LEV (1 : 5)             | 313.15 | 308.4 | -4.19 | -3.50 | -4.50 | -4.32 |                                |
| [Ch]Cl-LEV (1 : 5)             | 313.15 | 412.2 | -3.91 | -3.21 | -4.17 | -4.02 |                                |
| [Ch]Cl-LEV (1 : 5)             | 313.15 | 511.4 | -3.70 | -2.99 | -3.92 | -3.79 |                                |
| [Ch]Cl-LEV (1 : 5)             | 313.15 | 573.7 | -3.57 | -2.87 | -3.79 | -3.66 |                                |
| [Ch]Cl-LEV (1 : 5)             | 323.15 | 75.6  | -5.81 | -5.11 | -6.17 | -5.84 |                                |
| [Ch]Cl-LEV (1 : 5)             | 323.15 | 208.8 | -4.79 | -4.09 | -5.11 | -4.86 |                                |
| [Ch]Cl-LEV (1 : 5)             | 323.15 | 315.9 | -4.36 | -3.68 | -4.66 | -4.44 |                                |
| [Ch]Cl-LEV (1 : 5)             | 323.15 | 418.4 | -4.05 | -3.40 | -4.35 | -4.15 |                                |
| [Ch]Cl-LEV (1 : 5)             | 323.15 | 517.2 | -3.85 | -3.18 | -4.10 | -3.92 |                                |
| [Ch]Cl-LEV (1 : 5)             | 323.15 | 579.9 | -3.73 | -3.07 | -3.97 | -3.79 |                                |
| [Ch]Cl-LEV (1 : 5)             | 333.15 | 78.9  | -5.91 | -5.26 | -6.31 | -5.92 |                                |
| [Ch]Cl-LEV (1 : 5)             | 333.15 | 216.1 | -4.91 | -4.25 | -5.25 | -4.95 |                                |
| [Ch]Cl-LEV (1 : 5)             | 333.15 | 319.2 | -4.51 | -3.86 | -4.83 | -4.56 |                                |
| [Ch]Cl-LEV (1 : 5)             | 333.15 | 417.3 | -4.23 | -3.59 | -4.53 | -4.28 |                                |
| [Ch]Cl-LEV (1 : 5)             | 333.15 | 519.7 | -4.02 | -3.37 | -4.28 | -4.05 |                                |
| [Ch]Cl-LEV (1 : 5)             | 333.15 | 581   | -3.92 | -3.26 | -4.14 | -3.92 |                                |
| Betain-1,2-propanediol (1 : 6) | 308.15 | 189.5 | -5.19 | -4.11 | -5.17 | -5.13 | He et al. (2022) <sup>16</sup> |
| Betain-1,2-propanediol (1 : 6) | 308.15 | 303.3 | -4.76 | -3.64 | -4.66 | -4.63 |                                |
| Betain-1,2-propanediol (1 : 6) | 308.15 | 403.8 | -4.43 | -3.35 | -4.34 | -4.37 |                                |
| Betain-1,2-propanediol (1 : 6) | 308.15 | 505   | -4.20 | -3.13 | -4.08 | -4.19 |                                |
| Betain-1,2-propanediol (1 : 6) | 308.15 | 604.5 | -4.01 | -2.95 | -3.86 | -4.04 |                                |
| Betain-1,2-propanediol (1 : 6) | 318.15 | 208   | -5.30 | -4.21 | -5.29 | -5.20 |                                |
| Betain-1,2-propanediol (1 : 6) | 318.15 | 318   | -4.85 | -3.78 | -4.82 | -4.76 |                                |
| Betain-1,2-propanediol (1 : 6) | 318.15 | 423.8 | -4.53 | -3.50 | -4.49 | -4.51 |                                |
| Betain-1,2-propanediol (1 : 6) | 318.15 | 529.8 | -4.29 | -3.27 | -4.23 | -4.32 |                                |
| Betain-1,2-propanediol (1 : 6) | 318.15 | 634.3 | -4.10 | -3.09 | -4.01 | -4.18 |                                |
| Betain-1,2-propanediol (1 : 6) | 328.15 | 213   | -5.40 | -4.36 | -5.46 | -5.31 |                                |
| Betain-1,2-propanediol (1 : 6) | 328.15 | 332.5 | -4.95 | -3.92 | -4.97 | -4.86 |                                |

|                                |        |       |       |       |       |       |                                |
|--------------------------------|--------|-------|-------|-------|-------|-------|--------------------------------|
| Betain-1,2-propanediol (1 : 6) | 328.15 | 443.3 | -4.63 | -3.63 | -4.64 | -4.61 |                                |
| Betain-1,2-propanediol (1 : 6) | 328.15 | 552.8 | -4.36 | -3.41 | -4.38 | -4.43 |                                |
| Betain-1,2-propanediol (1 : 6) | 328.15 | 663.3 | -4.19 | -3.23 | -4.15 | -4.28 |                                |
| Betain-1,2-propanediol (1 : 6) | 338.15 | 217.3 | -5.50 | -4.51 | -5.62 | -5.43 |                                |
| Betain-1,2-propanediol (1 : 6) | 338.15 | 346.5 | -5.04 | -4.04 | -5.11 | -4.97 |                                |
| Betain-1,2-propanediol (1 : 6) | 338.15 | 461.8 | -4.70 | -3.76 | -4.78 | -4.72 |                                |
| Betain-1,2-propanediol (1 : 6) | 338.15 | 576   | -4.43 | -3.54 | -4.51 | -4.53 |                                |
| Betain-1,2-propanediol (1 : 6) | 338.15 | 691.5 | -4.25 | -3.35 | -4.29 | -4.38 |                                |
| Betain-1,2-propanediol (1 : 6) | 348.15 | 226   | -5.57 | -4.63 | -5.76 | -5.54 |                                |
| Betain-1,2-propanediol (1 : 6) | 348.15 | 360.3 | -5.12 | -4.16 | -5.24 | -5.08 |                                |
| Betain-1,2-propanediol (1 : 6) | 348.15 | 480.5 | -4.78 | -3.87 | -4.90 | -4.83 |                                |
| Betain-1,2-propanediol (1 : 6) | 348.15 | 599.3 | -4.50 | -3.65 | -4.64 | -4.64 |                                |
| Betain-1,2-propanediol (1 : 6) | 348.15 | 719   | -4.32 | -3.47 | -4.41 | -4.49 |                                |
| Betain-DEG (1 : 6)             | 308.15 | 202.8 | -4.87 | -3.65 | -4.71 | -4.85 | He et al. (2022) <sup>16</sup> |
| Betain-DEG (1 : 6)             | 308.15 | 312.5 | -4.43 | -3.22 | -4.24 | -4.38 |                                |
| Betain-DEG (1 : 6)             | 308.15 | 413.3 | -4.12 | -2.94 | -3.92 | -4.11 |                                |
| Betain-DEG (1 : 6)             | 308.15 | 512.3 | -3.89 | -2.73 | -3.68 | -3.92 |                                |
| Betain-DEG (1 : 6)             | 308.15 | 622   | -3.68 | -2.54 | -3.44 | -3.75 |                                |
| Betain-DEG (1 : 6)             | 318.15 | 214.5 | -5.02 | -3.80 | -4.88 | -4.95 |                                |
| Betain-DEG (1 : 6)             | 318.15 | 330.5 | -4.56 | -3.37 | -4.41 | -4.50 |                                |
| Betain-DEG (1 : 6)             | 318.15 | 437.3 | -4.25 | -3.10 | -4.09 | -4.23 |                                |
| Betain-DEG (1 : 6)             | 318.15 | 540.8 | -4.01 | -2.89 | -3.84 | -4.04 |                                |
| Betain-DEG (1 : 6)             | 318.15 | 656   | -3.78 | -2.70 | -3.61 | -3.86 |                                |
| Betain-DEG (1 : 6)             | 328.15 | 226   | -5.15 | -3.95 | -5.04 | -5.04 |                                |
| Betain-DEG (1 : 6)             | 328.15 | 348   | -4.69 | -3.52 | -4.57 | -4.59 |                                |
| Betain-DEG (1 : 6)             | 328.15 | 460.5 | -4.37 | -3.24 | -4.25 | -4.33 |                                |
| Betain-DEG (1 : 6)             | 328.15 | 593.3 | -4.12 | -2.99 | -3.94 | -4.09 |                                |
| Betain-DEG (1 : 6)             | 328.15 | 692   | -3.90 | -2.84 | -3.75 | -3.95 |                                |

|                         |        |       |       |       |       |       |                                   |
|-------------------------|--------|-------|-------|-------|-------|-------|-----------------------------------|
| Betain-DEG (1 : 6)      | 338.15 | 237   | -5.28 | -4.09 | -5.19 | -5.12 |                                   |
| Betain-DEG (1 : 6)      | 338.15 | 364.8 | -4.80 | -3.66 | -4.71 | -4.69 |                                   |
| Betain-DEG (1 : 6)      | 338.15 | 483   | -4.48 | -3.38 | -4.39 | -4.42 |                                   |
| Betain-DEG (1 : 6)      | 338.15 | 597.5 | -4.23 | -3.17 | -4.13 | -4.23 |                                   |
| Betain-DEG (1 : 6)      | 338.15 | 726.8 | -4.01 | -2.97 | -3.89 | -4.04 |                                   |
| Betain-DEG (1 : 6)      | 348.15 | 247.5 | -5.40 | -4.21 | -5.33 | -5.22 |                                   |
| Betain-DEG (1 : 6)      | 348.15 | 381   | -4.91 | -3.78 | -4.85 | -4.78 |                                   |
| Betain-DEG (1 : 6)      | 348.15 | 504.5 | -4.60 | -3.51 | -4.53 | -4.52 |                                   |
| Betain-DEG (1 : 6)      | 348.15 | 624.3 | -4.33 | -3.29 | -4.27 | -4.32 |                                   |
| Betain-DEG (1 : 6)      | 348.15 | 759.8 | -4.11 | -3.10 | -4.02 | -4.14 |                                   |
| Betain-DEA (1 : 6)      | 313.5  | 600   | -2.50 | -2.70 | -3.62 | -2.88 | He et al. (2022) <sup>16</sup>    |
| [TBA]Br-MDA (1 : 6)     | 303.15 | 445.6 | -2.24 | -2.37 | -3.33 | -2.43 | Haider et al. (2018) <sup>9</sup> |
| [TBA]Br-MDA (1 : 6)     | 303.15 | 573   | -2.18 | -2.14 | -3.05 | -2.17 |                                   |
| [TBA]Br-MDA (1 : 6)     | 303.15 | 661.7 | -2.11 | -2.01 | -2.89 | -2.02 |                                   |
| [TBA]Br-MDA (1 : 6)     | 303.15 | 721   | -1.99 | -1.94 | -2.80 | -1.93 |                                   |
| [TBA]Br-MDA (1 : 6)     | 303.15 | 911.2 | -1.89 | -1.65 | -2.43 | -1.67 |                                   |
| [TBA]Br-MDA (1 : 6)     | 303.15 | 1096  | -1.80 | -1.48 | -2.19 | -1.47 |                                   |
| [TBA]Br-DEA (1 : 6)     | 303.15 | 523.4 | -3.44 | -2.51 | -3.44 | -3.11 | Haider et al. (2018) <sup>9</sup> |
| [TBA]Br-DEA (1 : 6)     | 303.15 | 663.5 | -2.99 | -2.29 | -3.17 | -2.87 |                                   |
| [TBA]Br-DEA (1 : 6)     | 303.15 | 710   | -2.83 | -2.23 | -3.09 | -2.81 |                                   |
| [TBA]Br-DEA (1 : 6)     | 303.15 | 814   | -2.65 | -2.11 | -2.93 | -2.67 |                                   |
| [TBA]Br-DEA (1 : 6)     | 303.15 | 971   | -2.41 | -1.95 | -2.71 | -2.49 |                                   |
| [ATPP]Br-Phenol (1 : 6) | 313.15 | 183.3 | -3.71 | -3.59 | -4.67 | -3.70 | Wang et al. (2019) <sup>18</sup>  |
| [ATPP]Br-Phenol (1 : 6) | 313.15 | 409.8 | -2.83 | -2.79 | -3.79 | -2.89 |                                   |
| [ATPP]Br-Phenol (1 : 6) | 313.15 | 669   | -2.40 | -2.31 | -3.21 | -2.39 |                                   |
| [ATPP]Br-Phenol (1 : 6) | 313.15 | 871.7 | -2.05 | -2.05 | -2.87 | -2.10 |                                   |

|                         |        |        |       |       |       |       |                                   |
|-------------------------|--------|--------|-------|-------|-------|-------|-----------------------------------|
| [ATPP]Br-Phenol (1 : 6) | 313.15 | 1098.5 | -1.80 | -1.82 | -2.55 | -1.84 |                                   |
| [ATPP]Br-Phenol (1 : 6) | 313.15 | 1320.3 | -1.63 | -1.69 | -2.33 | -1.65 |                                   |
| [ATPP]Br-Phenol (1 : 6) | 323.15 | 159.9  | -3.83 | -3.93 | -5.04 | -4.00 |                                   |
| [ATPP]Br-Phenol (1 : 6) | 323.15 | 327.3  | -3.08 | -3.22 | -4.27 | -3.28 |                                   |
| [ATPP]Br-Phenol (1 : 6) | 323.15 | 567.9  | -2.55 | -2.68 | -3.63 | -2.73 |                                   |
| [ATPP]Br-Phenol (1 : 6) | 323.15 | 818.9  | -2.36 | -2.32 | -3.17 | -2.33 |                                   |
| [ATPP]Br-Phenol (1 : 6) | 323.15 | 1088.3 | -2.05 | -2.03 | -2.79 | -2.01 |                                   |
| [ATPP]Br-Phenol (1 : 6) | 323.15 | 1328.9 | -1.81 | -1.83 | -2.49 | -1.80 |                                   |
| [ATPP]Br-Phenol (1 : 6) | 333.15 | 191.2  | -3.85 | -3.95 | -5.06 | -3.97 |                                   |
| [ATPP]Br-Phenol (1 : 6) | 333.15 | 457.2  | -2.96 | -3.08 | -4.10 | -3.10 |                                   |
| [ATPP]Br-Phenol (1 : 6) | 333.15 | 700.8  | -2.55 | -2.66 | -3.58 | -2.65 |                                   |
| [ATPP]Br-Phenol (1 : 6) | 333.15 | 978.4  | -2.32 | -2.33 | -3.15 | -2.27 |                                   |
| [ATPP]Br-Phenol (1 : 6) | 333.15 | 1123.6 | -2.15 | -2.19 | -2.95 | -2.11 |                                   |
| [ATPP]Br-Phenol (1 : 6) | 333.15 | 1387.3 | -1.91 | -1.98 | -2.64 | -1.89 |                                   |
| [TPA]Cl-AC (1 : 6)      | 298.15 | 350    | -3.89 | -3.27 | -4.25 | -3.51 | Sarmad et al. (2017) <sup>6</sup> |
| [TPA]Cl-AC (1 : 6)      | 298.15 | 554    | -3.26 | -2.83 | -3.74 | -3.10 |                                   |
| [TPA]Cl-AC (1 : 6)      | 298.15 | 826    | -2.87 | -2.46 | -3.26 | -2.78 |                                   |
| [TPA]Cl-AC (1 : 6)      | 298.15 | 1220   | -2.56 | -2.10 | -2.76 | -2.47 |                                   |
| [TPA]Cl-AC (1 : 6)      | 298.15 | 1652   | -2.28 | -1.84 | -2.32 | -2.26 |                                   |
| [TPA]Cl-AC (1 : 6)      | 298.15 | 2030   | -2.08 | -1.46 | -1.80 | -2.13 |                                   |
| [TBA]Br-EA (1 : 6)      | 298.15 | 1000   | -2.15 | -1.66 | -2.40 | -1.94 | Sarmad et al. (2017) <sup>6</sup> |
| [TBA]Br-DEA (1 : 6)     | 298.15 | 1000   | -2.25 | -1.83 | -2.57 | -2.37 | Sarmad et al. (2017) <sup>6</sup> |
| [MTPP]Br-EA (1 : 6)     | 298.15 | 1000   | -1.94 | -1.70 | -2.43 | -2.15 | Ali et al. (2016) <sup>20</sup>   |
| [Ch]Cl-EA (1 : 7)       | 298.15 | 182    | -2.94 | -3.64 | -4.68 | -3.38 | Sarmad et al. (2017) <sup>6</sup> |
| [Ch]Cl-EA (1 : 7)       | 298.15 | 346    | -2.13 | -2.99 | -3.96 | -2.63 |                                   |
| [Ch]Cl-EA (1 : 7)       | 298.15 | 651    | -1.83 | -2.35 | -3.18 | -2.08 |                                   |

|                       |        |        |       |       |       |       |                                   |
|-----------------------|--------|--------|-------|-------|-------|-------|-----------------------------------|
| [Ch]Cl-EA (1 : 7)     | 298.15 | 1010   | -1.79 | -1.89 | -2.56 | -1.73 |                                   |
| [Ch]Cl-EA (1 : 7)     | 298.15 | 1365   | -1.69 | -1.67 | -2.17 | -1.51 |                                   |
| [Ch]Cl-EA (1 : 7)     | 298.15 | 1741   | -1.61 | -1.44 | -1.77 | -1.36 |                                   |
| [Ch]Cl-EA (1 : 7)     | 298.15 | 2035   | -1.60 | -1.29 | -1.49 | -1.27 |                                   |
| [TBA]Br-EA (1 : 7)    | 298.15 | 381    | -3.05 | -2.67 | -3.62 | -2.70 | Sarmad et al. (2017) <sup>6</sup> |
| [TBA]Br-EA (1 : 7)    | 298.15 | 637    | -2.29 | -2.22 | -3.05 | -2.25 |                                   |
| [TBA]Br-EA (1 : 7)    | 298.15 | 940    | -1.79 | -1.75 | -2.44 | -1.93 |                                   |
| [TBA]Br-EA (1 : 7)    | 298.15 | 1251   | -1.61 | -1.49 | -2.04 | -1.70 |                                   |
| [TBA]Br-EA (1 : 7)    | 298.15 | 1627   | -1.55 | -1.25 | -1.63 | -1.52 |                                   |
| [TBA]Br-EA (1 : 7)    | 298.15 | 2040   | -1.51 | -1.05 | -1.25 | -1.38 |                                   |
| [TPA]Cl-EA (1 : 7)    | 298.15 | 357    | -2.10 | -2.79 | -3.75 | -2.42 | Sarmad et al. (2017) <sup>6</sup> |
| [TPA]Cl-EA (1 : 7)    | 298.15 | 645    | -1.95 | -2.25 | -3.07 | -1.89 |                                   |
| [TPA]Cl-EA (1 : 7)    | 298.15 | 952    | -1.72 | -1.82 | -2.50 | -1.57 |                                   |
| [TPA]Cl-EA (1 : 7)    | 298.15 | 1232   | -1.59 | -1.58 | -2.14 | -1.37 |                                   |
| [TPA]Cl-EA (1 : 7)    | 298.15 | 1673   | -1.52 | -1.30 | -1.66 | -1.16 |                                   |
| [TPA]Cl-EA (1 : 7)    | 298.15 | 2019   | -1.50 | -1.13 | -1.33 | -1.05 |                                   |
| [TBA]Br-MDA (1 : 7)   | 303.15 | 594.5  | -2.17 | -2.13 | -3.01 | -2.11 | Haider et al. (2018) <sup>9</sup> |
| [TBA]Br-MDA (1 : 7)   | 303.15 | 674.3  | -2.06 | -2.02 | -2.86 | -1.98 |                                   |
| [TBA]Br-MDA (1 : 7)   | 303.15 | 723.4  | -1.97 | -1.88 | -2.70 | -1.91 |                                   |
| [TBA]Br-MDA (1 : 7)   | 303.15 | 802.5  | -1.82 | -1.78 | -2.57 | -1.80 |                                   |
| [TBA]Br-MDA (1 : 7)   | 303.15 | 940.7  | -1.66 | -1.64 | -2.36 | -1.63 |                                   |
| [TBA]Br-MDA (1 : 7)   | 303.15 | 1034.5 | -1.62 | -1.55 | -2.23 | -1.53 |                                   |
| [MTPP]Br-EA (1 : 7)   | 298.15 | 1000   | -2.08 | -1.72 | -2.39 | -2.14 | Ali et al. (2016) <sup>20</sup>   |
| [MTPP]Br-EA (1 : 8)   | 298.15 | 1000   | -2.13 | -1.74 | -2.33 | -2.12 | Ali et al. (2016) <sup>20</sup>   |
| [ATPP]Br-DEG (1 : 10) | 303.15 | 156    | -3.56 | -3.69 | -4.80 | -3.49 | Ghaedi et al (2017) <sup>19</sup> |
| [ATPP]Br-DEG (1 : 10) | 303.15 | 340    | -2.76 | -2.95 | -3.93 | -2.64 |                                   |

|                       |        |      |       |       |       |       |                                      |
|-----------------------|--------|------|-------|-------|-------|-------|--------------------------------------|
| [ATPP]Br-DEG (1 : 10) | 303.15 | 490  | -2.37 | -2.61 | -3.49 | -2.30 |                                      |
| [ATPP]Br-DEG (1 : 10) | 303.15 | 734  | -1.93 | -2.24 | -2.96 | -1.93 |                                      |
| [ATPP]Br-DEG (1 : 10) | 303.15 | 884  | -1.71 | -1.98 | -2.60 | -1.76 |                                      |
| [ATPP]Br-TEG (1 : 10) | 303.15 | 149  | -3.52 | -3.22 | -4.33 | -3.68 | Ghaedi et al<br>(2017) <sup>19</sup> |
| [ATPP]Br-TEG (1 : 10) | 303.15 | 331  | -2.72 | -2.46 | -3.45 | -2.78 |                                      |
| [ATPP]Br-TEG (1 : 10) | 303.15 | 491  | -2.29 | -2.06 | -2.94 | -2.36 |                                      |
| [ATPP]Br-TEG (1 : 10) | 303.15 | 744  | -1.87 | -1.68 | -2.39 | -1.88 |                                      |
| [ATPP]Br-TEG (1 : 10) | 303.15 | 880  | -1.68 | -1.53 | -2.15 | -1.67 |                                      |
| [ATPP]Br-TEG (1 : 10) | 303.15 | 1080 | -1.45 | -1.35 | -1.84 | -1.41 |                                      |
| [ATPP]Br-TEG (1 : 10) | 303.15 | 1468 | -1.12 | -1.10 | -1.33 | -1.05 |                                      |
| [ATPP]Br-TEG (1 : 10) | 303.15 | 1953 | -0.80 | -0.87 | -0.78 | -0.78 |                                      |
| [ATPP]Br-DEG (1 : 16) | 303.15 | 166  | -3.74 | -3.67 | -4.82 | -3.43 | Ghaedi et al<br>(2017) <sup>19</sup> |
| [ATPP]Br-DEG (1 : 16) | 303.15 | 325  | -3.04 | -3.03 | -4.01 | -2.69 |                                      |
| [ATPP]Br-DEG (1 : 16) | 303.15 | 490  | -2.58 | -2.65 | -3.44 | -2.32 |                                      |
| [ATPP]Br-DEG (1 : 16) | 303.15 | 742  | -2.11 | -2.18 | -2.70 | -1.96 |                                      |
| [ATPP]Br-DEG (1 : 16) | 303.15 | 880  | -1.90 | -2.02 | -2.39 | -1.81 |                                      |
| [ATPP]Br-DEG (1 : 16) | 303.15 | 1105 | -1.63 | -1.80 | -1.92 | -1.62 |                                      |
| [ATPP]Br-DEG (1 : 16) | 303.15 | 1471 | -1.29 | -1.53 | -1.25 | -1.40 |                                      |
| [ATPP]Br-TEG (1 : 16) | 303.15 | 146  | -3.77 | -3.26 | -4.43 | -3.76 | Ghaedi et al<br>(2017) <sup>19</sup> |
| [ATPP]Br-TEG (1 : 16) | 303.15 | 323  | -2.97 | -2.47 | -3.45 | -2.85 |                                      |
| [ATPP]Br-TEG (1 : 16) | 303.15 | 492  | -2.49 | -2.07 | -2.87 | -2.41 |                                      |
| [ATPP]Br-TEG (1 : 16) | 303.15 | 744  | -2.03 | -1.69 | -2.21 | -1.94 |                                      |
| [ATPP]Br-TEG (1 : 16) | 303.15 | 887  | -1.82 | -1.54 | -1.90 | -1.74 |                                      |
| [ATPP]Br-TEG (1 : 16) | 303.15 | 1070 | -1.58 | -1.37 | -1.53 | -1.51 |                                      |
| [ATPP]Br-TEG (1 : 16) | 303.15 | 1471 | -1.25 | -1.11 | -0.83 | -1.17 |                                      |
| [ATPP]Br-TEG (1 : 16) | 303.15 | 1957 | -0.89 | -0.88 | -0.07 | -0.91 |                                      |



|                    |        |         |       |       |       |       |                                     |
|--------------------|--------|---------|-------|-------|-------|-------|-------------------------------------|
| [Ch]Cl-ECN (1 : 2) | 298.15 | 110.4   | -4.77 | -4.21 | -5.32 | -5.11 | Song et al.<br>(2020) <sup>21</sup> |
| [Ch]Cl-ECN (1 : 2) | 298.15 | 448.12  | -3.35 | -2.85 | -3.92 | -3.59 |                                     |
| [Ch]Cl-ECN (1 : 2) | 298.15 | 802.84  | -2.80 | -2.29 | -3.33 | -2.87 |                                     |
| [Ch]Cl-ECN (1 : 2) | 298.15 | 1119.38 | -2.51 | -1.98 | -2.98 | -2.41 |                                     |
| [Ch]Cl-ECN (1 : 2) | 298.15 | 1407.8  | -2.25 | -1.77 | -2.74 | -2.11 |                                     |
| [Ch]Cl-ECN (1 : 2) | 328.15 | 121.86  | -5.08 | -4.82 | -5.58 | -5.24 |                                     |
| [Ch]Cl-ECN (1 : 2) | 328.15 | 408.2   | -3.80 | -3.62 | -4.35 | -3.96 |                                     |
| [Ch]Cl-ECN (1 : 2) | 328.15 | 736.19  | -3.24 | -3.05 | -3.74 | -3.26 |                                     |
| [Ch]Cl-ECN (1 : 2) | 328.15 | 937.5   | -3.02 | -2.81 | -3.48 | -2.94 |                                     |
| [Ch]Cl-ECN (1 : 2) | 328.15 | 1140.2  | -2.76 | -2.62 | -3.27 | -2.67 |                                     |
| [Ch]Cl-ECN (1 : 2) | 328.15 | 1409.54 | -2.57 | -2.42 | -3.04 | -2.41 |                                     |
| [Ch]Cl-ECN (1 : 3) | 298.15 | 112.48  | -4.77 | -4.23 | -5.32 | -4.76 | Song et al.<br>(2020) <sup>21</sup> |
| [Ch]Cl-ECN (1 : 3) | 298.15 | 404.38  | -3.54 | -2.96 | -4.01 | -3.43 |                                     |
| [Ch]Cl-ECN (1 : 3) | 298.15 | 796.93  | -2.92 | -2.30 | -3.28 | -2.75 |                                     |
| [Ch]Cl-ECN (1 : 3) | 298.15 | 1134.65 | -2.59 | -1.96 | -2.88 | -2.38 |                                     |
| [Ch]Cl-ECN (1 : 3) | 298.15 | 1409.54 | -2.38 | -1.75 | -2.62 | -2.18 |                                     |
| [Ch]Cl-ECN (1 : 3) | 328.15 | 112.48  | -5.60 | -4.92 | -5.77 | -5.32 |                                     |
| [Ch]Cl-ECN (1 : 3) | 328.15 | 421.39  | -4.03 | -3.60 | -4.40 | -3.96 |                                     |
| [Ch]Cl-ECN (1 : 3) | 328.15 | 816.02  | -3.34 | -2.95 | -3.68 | -3.28 |                                     |
| [Ch]Cl-ECN (1 : 3) | 328.15 | 1138.47 | -3.01 | -2.62 | -3.29 | -2.91 |                                     |
| [Ch]Cl-ECN (1 : 3) | 328.15 | 1405.72 | -2.82 | -2.41 | -3.04 | -2.71 |                                     |

Cartesian coordinates (in Å) and calculated single point energy of calculation of triethylene glycol.

Triethyleneglycol (TEG)

# *B3LYP/6-311++G(d,p)*

**Energy:** -538.0865

|   |          |          |          |
|---|----------|----------|----------|
| C | 0.59685  | 0.47348  | 0.01593  |
| C | -0.59449 | -0.46890 | -0.01644 |
| O | 1.77069  | -0.31951 | -0.00850 |
| H | 0.56096  | 1.08913  | 0.92554  |
| H | 0.56295  | 1.14732  | -0.85141 |
| H | -0.55778 | -1.14549 | 0.84896  |
| H | -0.56167 | -1.08140 | -0.92807 |
| O | -1.77048 | 0.32224  | 0.01442  |
| C | -2.96454 | -0.43805 | -0.01739 |
| H | -3.01790 | -1.10221 | 0.86120  |
| H | -3.00411 | -1.06907 | -0.91641 |
| C | -4.14325 | 0.52894  | -0.01675 |
| H | -4.08413 | 1.18463  | 0.86009  |
| O | -5.38831 | -0.16311 | -0.07115 |
| H | -4.10417 | 1.15675  | -0.90803 |
| C | 2.96514  | 0.44352  | 0.01442  |
| C | 4.13492  | -0.52476 | -0.01528 |
| H | 3.01648  | 1.06000  | 0.92275  |
| H | 3.01594  | 1.11420  | -0.85461 |
| H | 4.07746  | -1.19199 | 0.85331  |
| O | 5.32478  | 0.26331  | 0.01162  |
| H | 4.07962  | -1.13480 | -0.92504 |
| H | 6.08677  | -0.32190 | -0.01330 |
| H | -5.53160 | -0.61402 | 0.76692  |

Triethyleneglycol (TEG)

# B3LYP/6-311++G(d,p) empiricaldispersion=gd3

**Energy:** -538.1035

|   |          |          |          |
|---|----------|----------|----------|
| C | 0.59685  | 0.47348  | 0.01593  |
| C | -0.59449 | -0.46890 | -0.01644 |
| O | 1.77069  | -0.31951 | -0.00850 |
| H | 0.56096  | 1.08913  | 0.92554  |
| H | 0.56295  | 1.14732  | -0.85141 |
| H | -0.55778 | -1.14549 | 0.84896  |
| H | -0.56167 | -1.08140 | -0.92807 |
| O | -1.77048 | 0.32224  | 0.01442  |
| C | -2.96454 | -0.43805 | -0.01739 |
| H | -3.01790 | -1.10221 | 0.86120  |
| H | -3.00411 | -1.06907 | -0.91641 |
| C | -4.14325 | 0.52894  | -0.01675 |
| H | -4.08413 | 1.18463  | 0.86009  |
| O | -5.38831 | -0.16311 | -0.07115 |
| H | -4.10417 | 1.15675  | -0.90803 |
| C | 2.96514  | 0.44352  | 0.01442  |
| C | 4.13492  | -0.52476 | -0.01528 |
| H | 3.01648  | 1.06000  | 0.92275  |
| H | 3.01594  | 1.11420  | -0.85461 |
| H | 4.07746  | -1.19199 | 0.85331  |
| O | 5.32478  | 0.26331  | 0.01162  |
| H | 4.07962  | -1.13480 | -0.92504 |
| H | 6.08677  | -0.32190 | -0.01330 |
| H | -5.53160 | -0.61402 | 0.76692  |

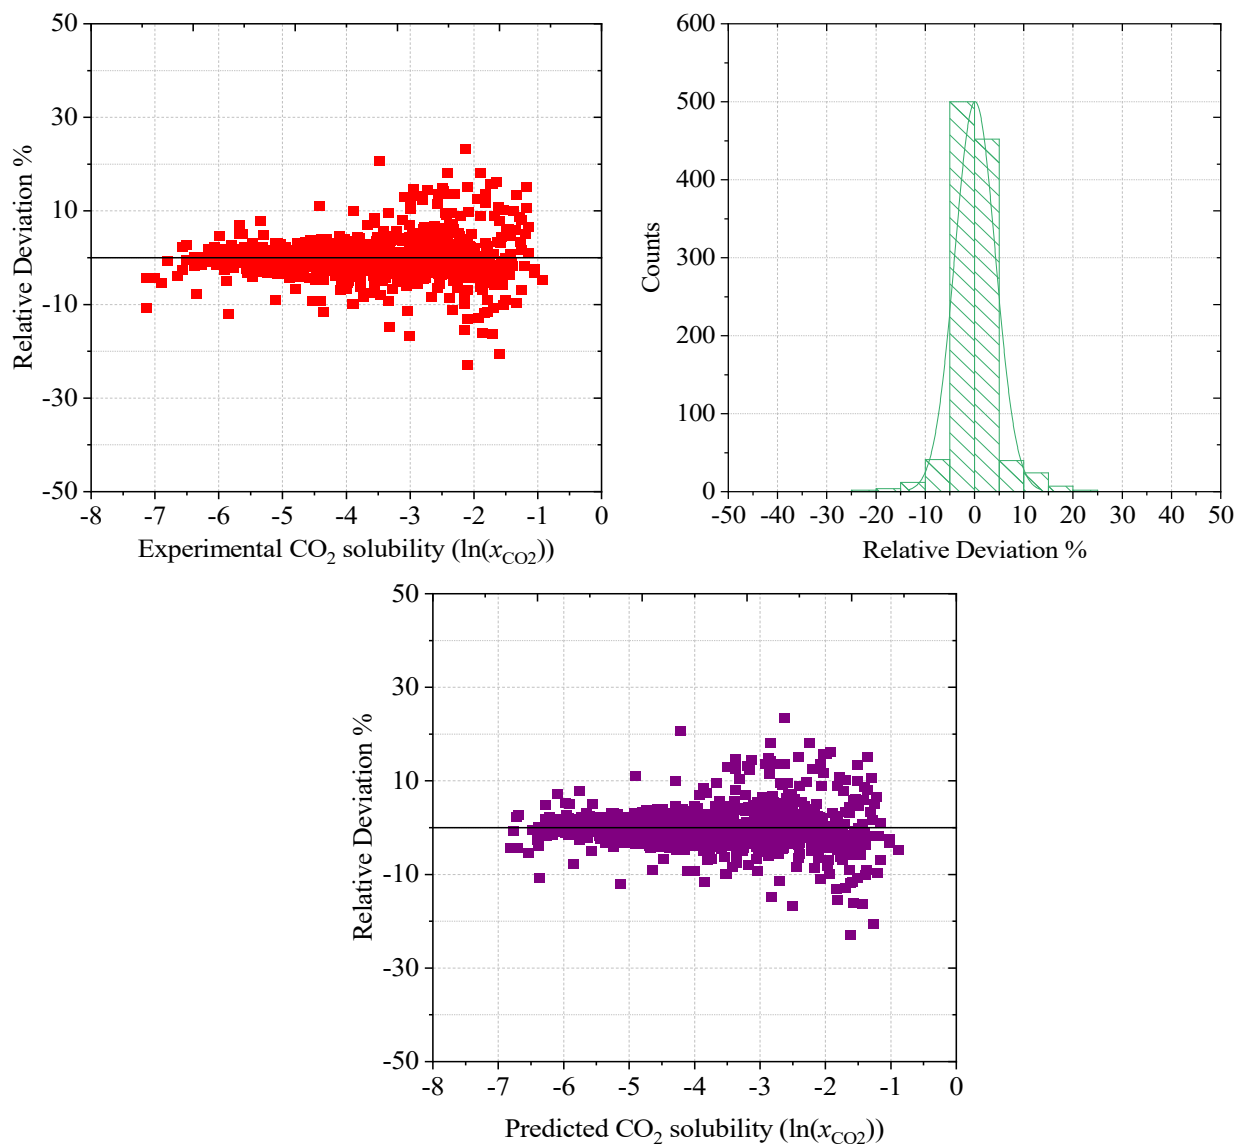

**Figure S1.** Statistical residual analysis of predicted CO<sub>2</sub> solubility data for training set

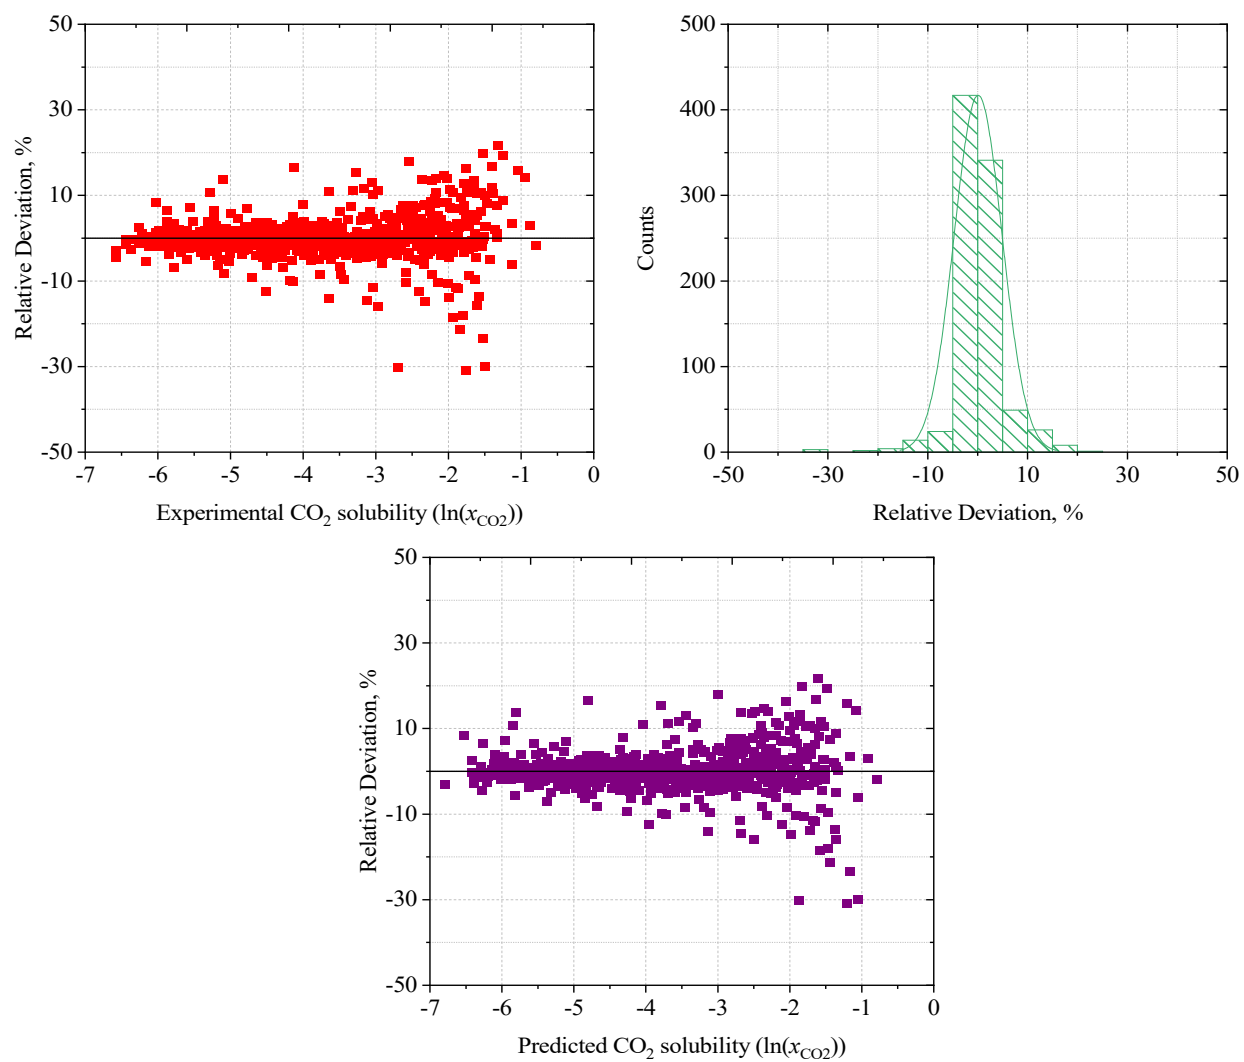

**Figure S2.** Statistical residual analysis of predicted CO<sub>2</sub> solubility data for testing set

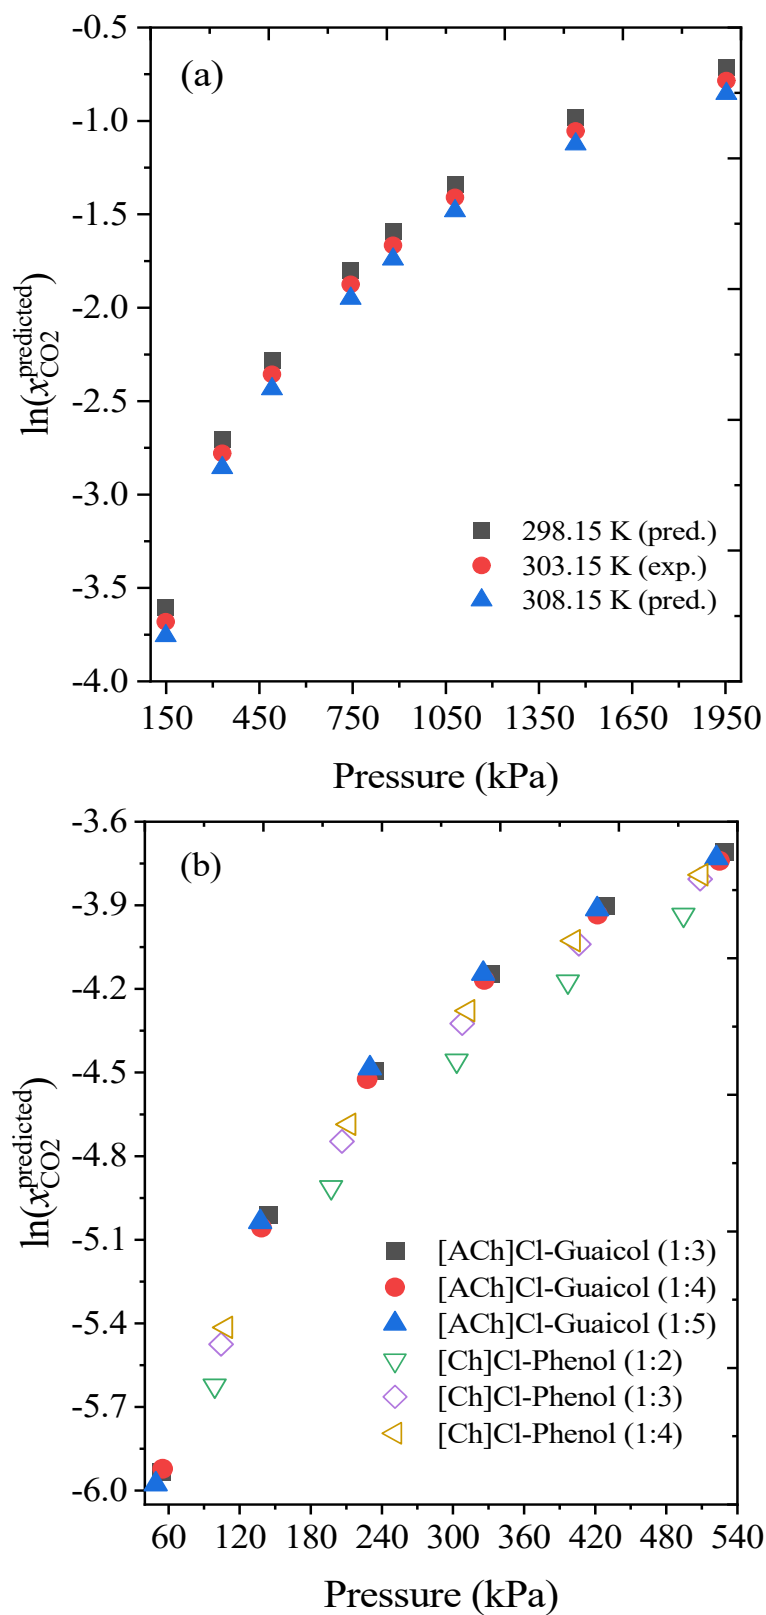

**Figure S3.** ANN-based machine learning predicted CO<sub>2</sub> solubility in (a) [ATTP]Br-TEG (1:10) DES at different temperatures and (b) effect of molar ratio of DESs.

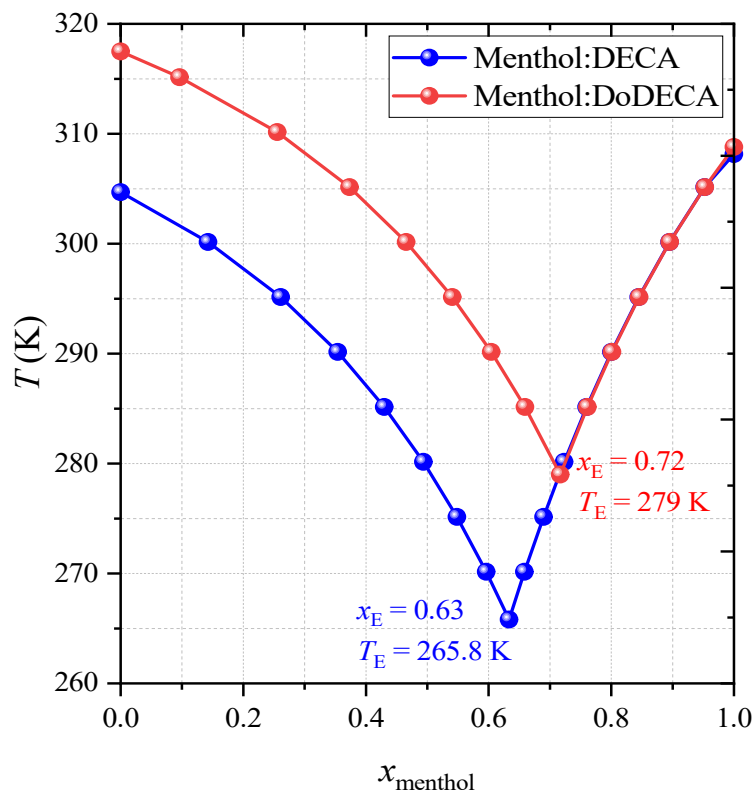

**Figure S4.** COSMO-RS predicted eutectic point composition of DES composed of menthol with decanoic acid/dodecanoic acid.

## References

1. X. Li, X. Liu and D. Deng, *J. Chem. Eng. Data*, 2018, **63**, 2091-2096.
2. A. Alhadid, J. Safarov, L. Mokrushina, K. Müller and M. Minceva, *Front. Chem.*, 2022, 300.
3. X. Li, M. Hou, B. Han, X. Wang and L. Zou, *J. Chem. Eng. Data*, 2008, **53**, 548-550.
4. L. F. Zubeir, D. J. Van Osch, M. A. Rocha, F. Banat and M. C. Kroon, *J. Chem. Eng. Data*, 2018, **63**, 913-919.
5. R. B. Leron and M.-H. Li, *Thermochim. Acta*, 2013, **551**, 14-19.
6. S. Sarmad, Y. Xie, J.-P. Mikkola and X. Ji, *New Journal of Chemistry*, 2017, **41**, 290-301.
7. G. Li, D. Deng, Y. Chen, H. Shan and N. Ai, *J. Chem. Thermodyn.*, 2014, **75**, 58-62.
8. L. F. Zubeir, M. H. Lacroix and M. C. Kroon, *J. Phy. Chem. B*, 2014, **118**, 14429-14441.
9. M. B. Haider, D. Jha, B. Marriyappan Sivagnanam and R. Kumar, *J. Chem. Eng. Data*, 2018, **63**, 2671-2680.
10. F. Luo, X. Liu, S. Chen, Y. Song, X. Yi, C. Xue, L. Sun and J. Li, *ACS Sustain. Chem. Eng.*, 2021, **9**, 10250-10265.
11. Y. Ji, Y. Hou, S. Ren, C. Yao and W. Wu, *Fluid Phase Equilib.*, 2016, **429**, 14-20.
12. M. Lu, G. Han, Y. Jiang, X. Zhang, D. Deng and N. Ai, *J. Chem. Thermodyn.*, 2015, **88**, 72-77.
13. Y. Chen, N. Ai, G. Li, H. Shan, Y. Cui and D. Deng, *J. Chem. Eng. Data*, 2014, **59**, 1247-1253.
14. X. Liu, B. Gao, Y. Jiang, N. Ai and D. Deng, *J. Chem. Eng. Data*, 2017, **62**, 1448-1455.
15. D. Deng, Y. Jiang, X. Liu, Z. Zhang and N. Ai, *J. Chem. Thermodyn.*, 2016, **103**, 212-217.
16. N. He, Q. Chen, J. Fan, F. Song, Y. Zhang and H. Mu, *Available at SSRN 4142018*, 2022.
17. R. Haghbakhsh, M. Keshtkar, A. Shariati and S. Raeissi, *Fluid Phase Equilib.*, 2022, **561**, 113535.
18. J. Wang, H. Cheng, Z. Song, L. Chen, L. Deng and Z. Qi, *Ind. Eng. Chem. Res.*, 2019, **58**, 17514-17523.
19. H. Ghaedi, M. Ayoub, S. Sufian, A. M. Shariff, S. M. Hailegiorgis and S. N. Khan, *J. Mol. Liq.*, 2017, **243**, 564-571.
20. E. Ali, M. K. Hadj-Kali, S. Mulyono and I. Alnashef, *International Journal of Greenhouse Gas Control*, 2016, **47**, 342-350.
21. Z. Song, X. Hu, H. Wu, M. Mei, S. Linke, T. Zhou, Z. Qi and K. SundmÄcher, *ACS Sustain. Chem. Eng.*, 2020, **8**, 8741-8751.
